# Supplementary material for: Nickel-catalyzed hydroalkenylation of styrene with phenylpropanal: theoretical studies on the mechanism, regioselectivity, and role of phenylboronic acid
Source: Royal Society of Chemistry journal article supplement (doi:10.1039/d0qo00573h), 2020-01-01
Supplement: d0qo00573h1.pdf [file d0qo00573h1.pdf]

## **Nickel-catalyzed hydroalkenylation of styrene with phenylpropanal: theoretical studies on the mechanism, regioselectivity, and role of phenylboronic acid**

Jing Zhang<sup>a,b</sup>, Jiaying Sun<sup>b</sup>, Zhangyu Yu<sup>a,b,\*</sup>, Lingli Han<sup>a,b,\*</sup>, Tao Liu<sup>a,b,\*</sup>

<sup>a</sup>Department of Chemistry and Chemical Engineering, Jining University, Qufu 273155, Shandong, China

<sup>b</sup>School of Chemistry and Chemical Engineering, Qufu Normal University, Qufu 273165, Shandong, China

*Correspondent author email addresses: zhy\_yu@126.com, hll\_2002@sina.com, liutao\_2005@126.com*

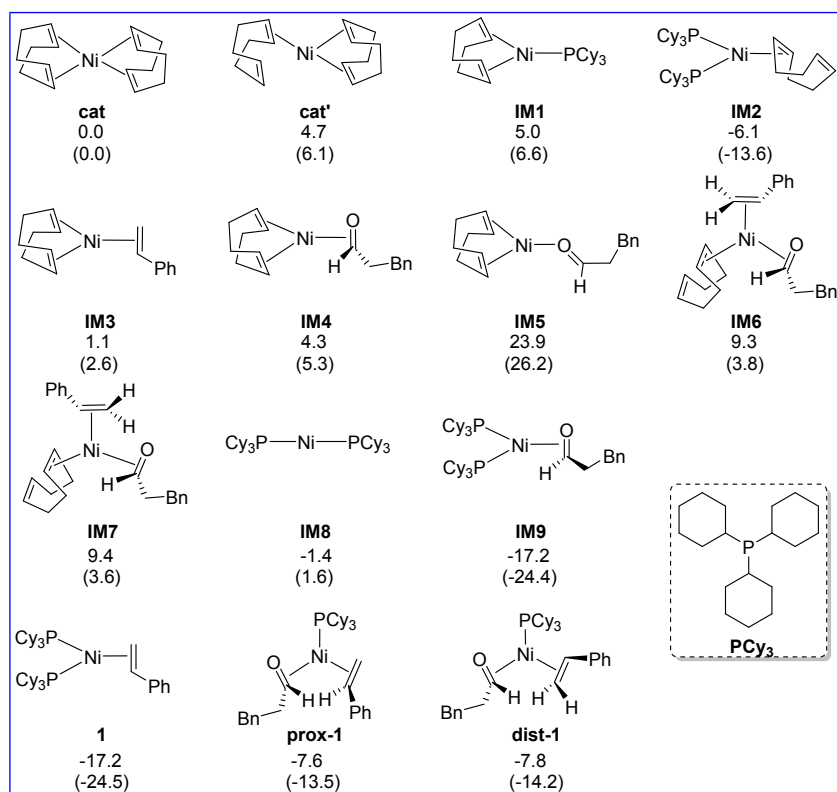

**Scheme S1** Relative stabilities of various Ni-adducts in ethanol solvent. The relative free energies and relative enthalpic energies (in parentheses) are given in kcal/mol, where the energy of **cat** is set to be the zero reference energy point.

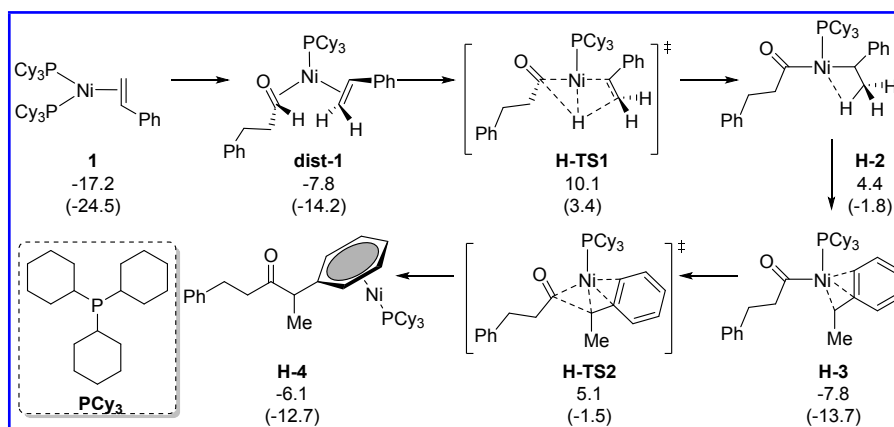

**Scheme S2** The mechanism of the nickel-catalyzed intermolecular hydroacylation of alkene to produce branched ketone **P3** in the absence of  $\text{PhB}(\text{OH})_2$  under this reaction condition. The relative free energies and relative enthalpic energies (in parentheses) are given in kcal/mol, where the energy of **cat** is set to be the zero reference energy point.

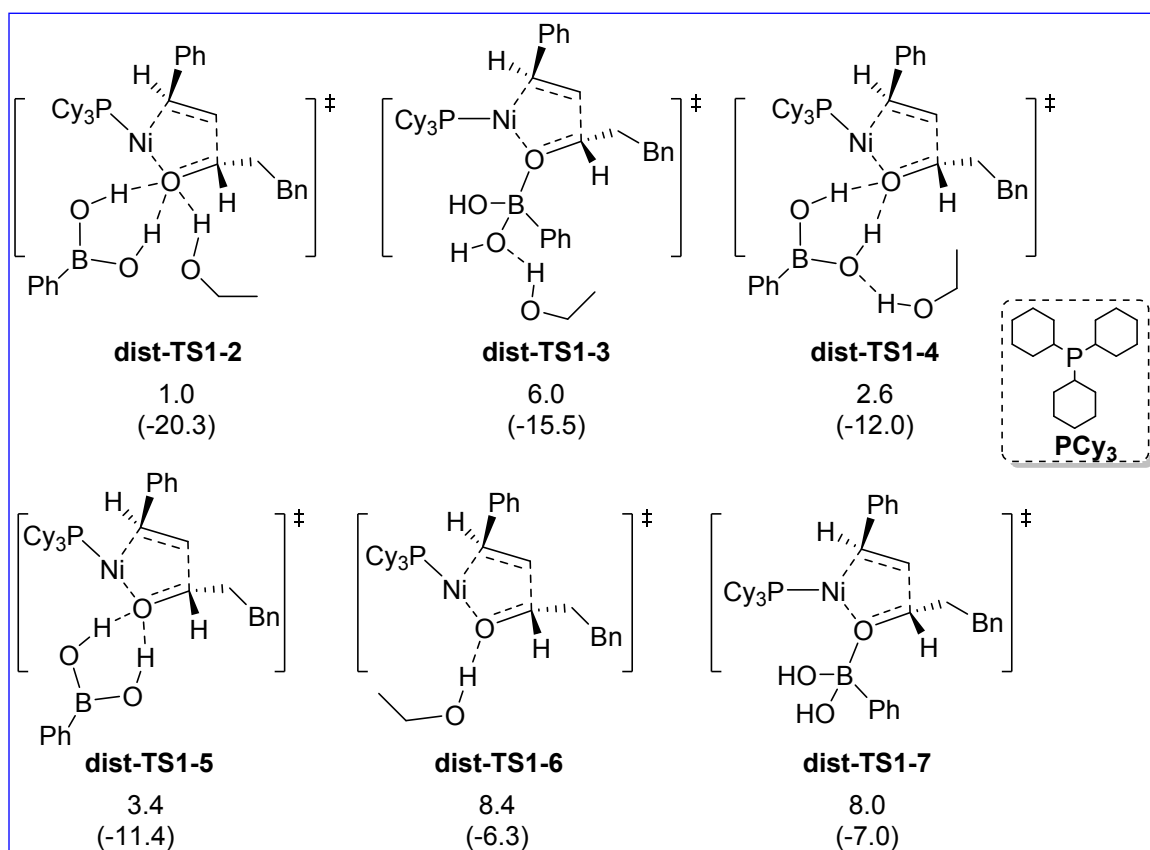

**Scheme S3** Other unfavorable **dist**-isomers of oxidative cyclization transition state in ethanol solvent. The relative free energies and relative enthalpic energies (in parentheses) are given in kcal/mol.

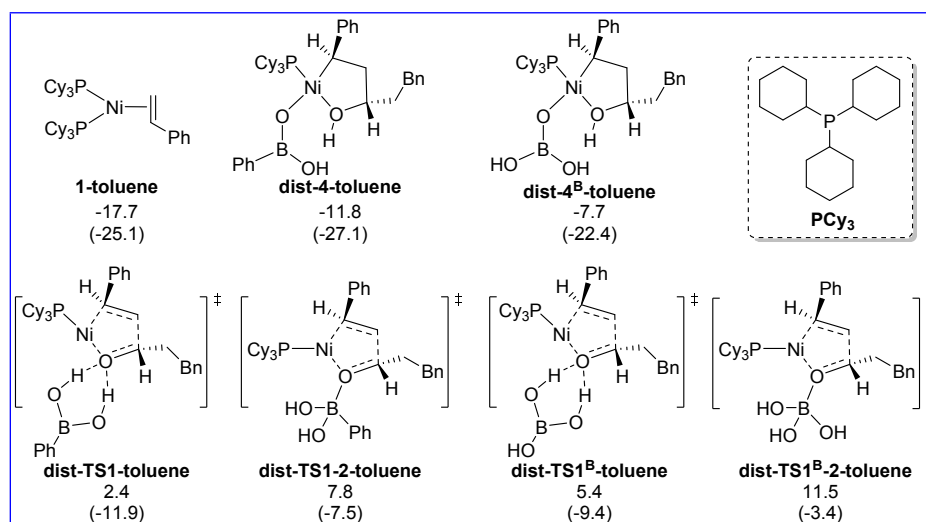

**Scheme S4** Other related structures in toluene. The relative free energies and relative enthalpic energies (in parentheses) are given in kcal/mol.

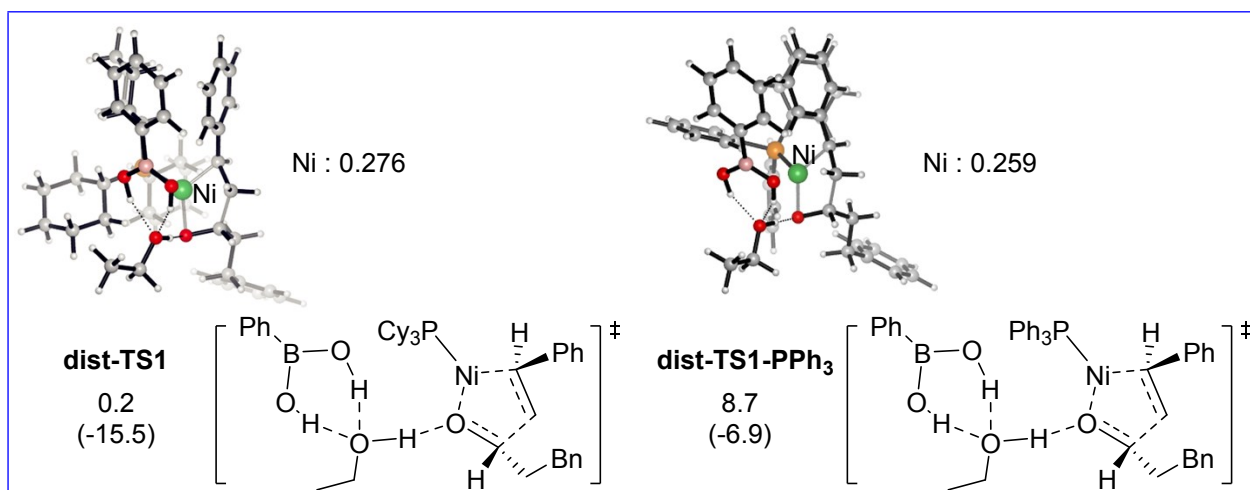

**Scheme S5** NBO charges ( $e$ ) in the optimized structures of transition states **dist-TS1** and **dist-TS1-PPh<sub>3</sub>** in ethanol solvent. The relative free energies and relative enthalpic energies (in parentheses) are given in kcal/mol.

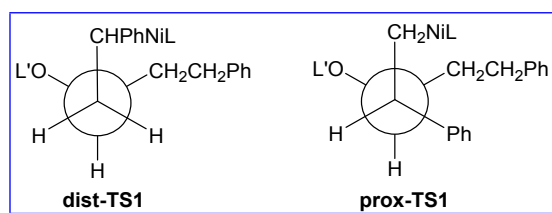

**Fig. S1** Newmann projections of the C–C bond that is being formed in **dist-TS1** and **prox-TS1**.

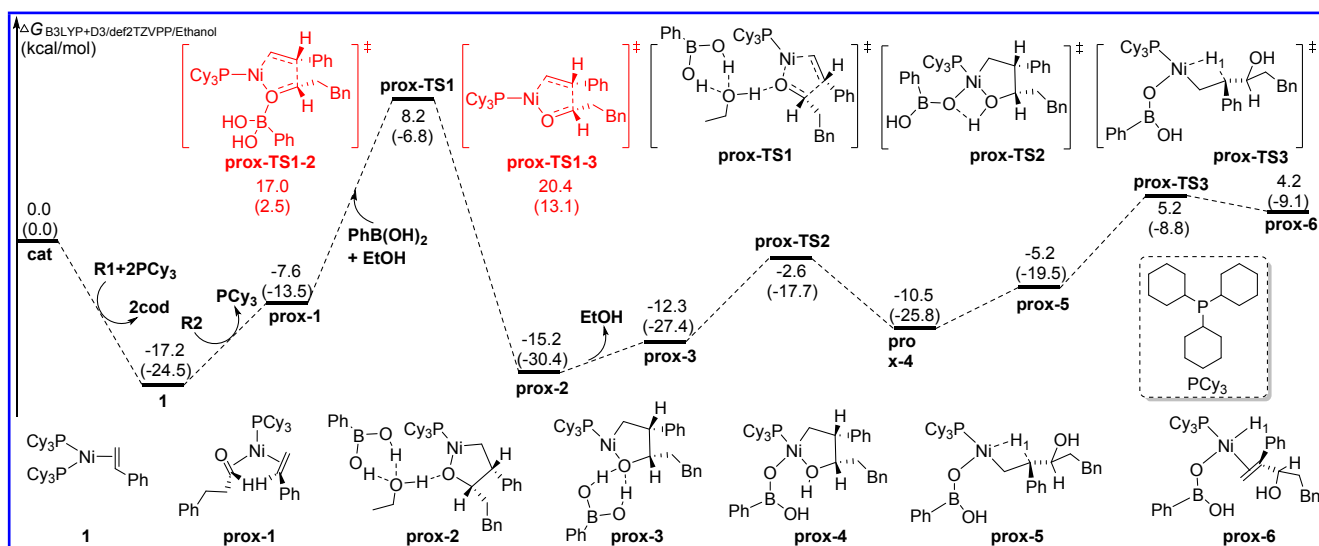

**Fig. S2** The unfavorable process for **prox**-isomer to generate branched product in ethanol solvent. The relative free energies and relative enthalpic energies (in parentheses) are given in kcal/mol.



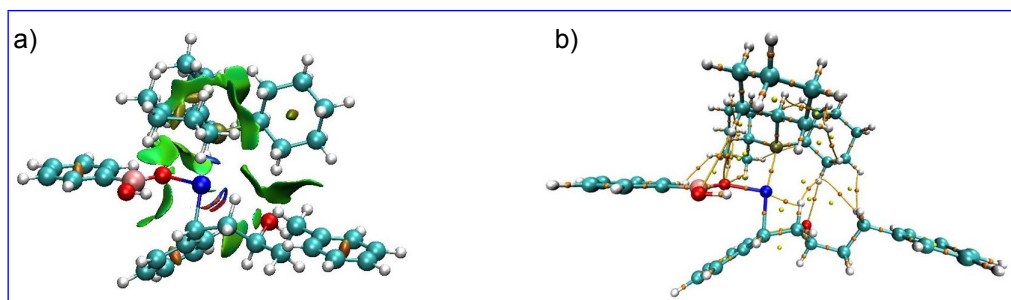

**Fig. S3** a) Noncovalent interactions analyses for **dist-5**. Blue, green, and red surfaces represent the strong interaction, weak interaction, and steric effect, respectively. b) Molecular graphs of **dist-5**. Orange and yellow dots represent the bond critical points (BCPs) and ring critical points (RCPs).

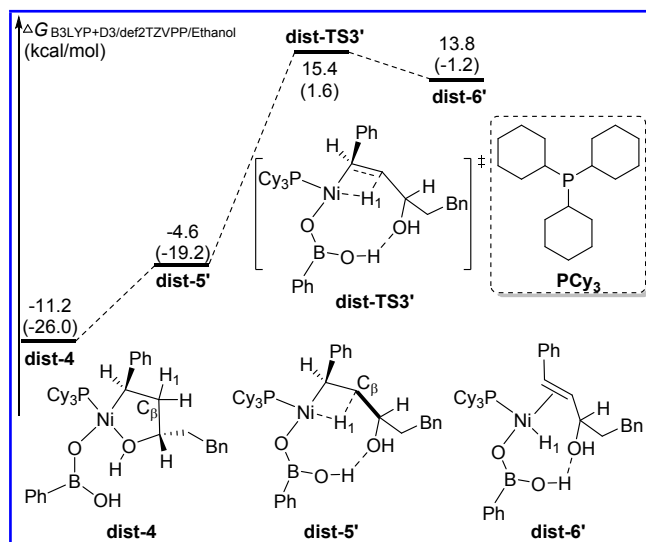

**Fig. S4** The unfavorable  $\beta$ -hydride elimination process caused by different position of  $\text{PhB(OH)}_2$  in ethanol solvent. The relative free energies and relative enthalpic energies (in parentheses) are given in kcal/mol. The bond distances are given in Å.

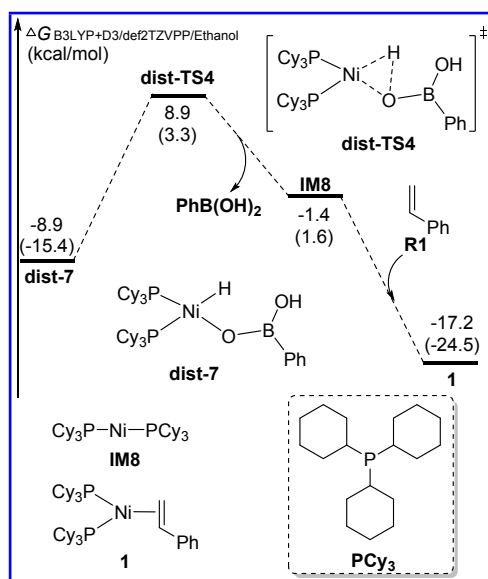

**Fig. S5** The reductive elimination process from **dist-7** in ethanol solvent. The relative free energies and relative enthalpic energies (in parentheses) are given in kcal/mol.

## Cartesian coordinates and sum of electronic and thermal Gibbs energies for all of the calculated structure

|                                              |              |             |             |                                              |              |             |             |
|----------------------------------------------|--------------|-------------|-------------|----------------------------------------------|--------------|-------------|-------------|
| <b>cat</b>                                   |              |             |             | H                                            | -0.75732600  | 2.36879500  | 0.95898900  |
| Sum of electronic and thermal Free Energies= | -2131.991568 |             |             | Ni                                           | -0.00000100  | 0.00002100  | -0.00003700 |
| C                                            | 1.50816200   | 0.46273200  | -1.47924000 |                                              |              |             |             |
| C                                            | 1.36554900   | 1.53460900  | -0.61195200 |                                              |              |             |             |
| H                                            | 0.97655200   | 0.53052900  | -2.42569000 | <b>cat'</b>                                  |              |             |             |
| C                                            | 2.61442200   | -0.58562500 | -1.42410200 | Sum of electronic and thermal Free Energies= | -2131.985163 |             |             |
| H                                            | 3.52816100   | -0.13892000 | -1.02288900 | C                                            | 2.13611400   | 1.23363600  | -0.79844400 |
| H                                            | 2.85838300   | -0.89841400 | -2.44546600 | C                                            | 1.46713900   | 1.62708600  | 0.34315700  |
| C                                            | 2.22501900   | 1.83758300  | 0.60197100  | H                                            | 1.82899100   | 1.69413700  | -1.73772000 |
| H                                            | 3.13172000   | 2.38916700  | 0.30713100  | C                                            | 3.41788200   | 0.41601200  | -0.84377200 |
| H                                            | 1.65388600   | 2.51512300  | 1.24678500  | H                                            | 4.03858300   | 0.64696000  | 0.02479200  |
| H                                            | 0.75730000   | 2.36863000  | -0.95943100 | H                                            | 4.00019100   | 0.71404000  | -1.72194000 |
| C                                            | 2.61438200   | 0.58563700  | 1.42420500  | C                                            | 1.82815600   | 1.29525700  | 1.77961200  |
| H                                            | 3.52812400   | 0.13895200  | 1.02298000  | H                                            | 2.56072500   | 2.01682400  | 2.17042900  |
| H                                            | 2.85834000   | 0.89841200  | 2.44557400  | H                                            | 0.91968900   | 1.42822900  | 2.37785000  |
| C                                            | 2.22508300   | -1.83756700 | -0.60184700 | H                                            | 0.70564500   | 2.39930500  | 0.23335700  |
| H                                            | 1.65400500   | -2.51515200 | -1.24666100 | C                                            | 2.35615700   | -0.14890400 | 1.99563300  |
| H                                            | 3.13179800   | -2.38910000 | -0.30695500 | H                                            | 3.42823500   | -0.19438700 | 1.79207700  |
| C                                            | 1.50813700   | -0.46273000 | 1.47932200  | H                                            | 2.23611400   | -0.40441600 | 3.05380200  |
| C                                            | 1.36555900   | -1.53460000 | 0.61203800  | C                                            | 3.16373800   | -1.11645800 | -0.92812400 |
| H                                            | 0.97644400   | -0.53048600 | 2.42572600  | H                                            | 2.95793500   | -1.37956900 | -1.97147900 |
| H                                            | 0.75725700   | -2.36859900 | 0.95947000  | H                                            | 4.08413700   | -1.65198100 | -0.65266100 |
| C                                            | -1.50812900  | -0.46301400 | -1.47921600 | C                                            | 1.61981400   | -1.17610200 | 1.15143200  |
| C                                            | -1.36551600  | -1.53472700 | -0.61173300 | C                                            | 1.99197800   | -1.61350500 | -0.10159600 |
| H                                            | -0.97647500  | -0.53095800 | -2.42563100 | H                                            | 0.82925400   | -1.73123300 | 1.65606400  |
| C                                            | -2.61440200  | 0.58534000  | -1.42429500 | H                                            | 1.50487800   | -2.51049200 | -0.48457900 |
| H                                            | -3.52813600  | 0.13870900  | -1.02299000 | C                                            | -3.90607500  | 0.90942900  | 0.40937600  |
| H                                            | -2.85836400  | 0.89791800  | -2.44572300 | C                                            | -4.24380500  | -0.39055700 | 0.33705700  |
| C                                            | -2.22501400  | -1.83748800 | 0.60222300  | H                                            | -4.74153600  | 1.61131200  | 0.39358400  |
| H                                            | -3.13170300  | -2.38913200 | 0.30745900  | C                                            | -2.54291400  | 1.57767200  | 0.42016900  |
| H                                            | -1.65389500  | -2.51490700 | 1.24717500  | H                                            | -1.85812600  | 1.13089300  | 1.14593200  |
| H                                            | -0.75723200  | -2.36879400 | -0.95903700 | H                                            | -2.68606300  | 2.61579000  | 0.73958300  |
| C                                            | -2.61441000  | -0.58539600 | 1.42421900  | C                                            | -3.40071400  | -1.64244900 | 0.32782200  |
| H                                            | -3.52815500  | -0.13880000 | 1.02289900  | H                                            | -3.74026300  | -2.26855700 | 1.16730700  |
| H                                            | -2.85837900  | -0.89798800 | 2.44564200  | H                                            | -3.65351000  | -2.21929900 | -0.57439400 |
| C                                            | -2.22506800  | 1.83744800  | -0.60229400 | H                                            | -5.31485600  | -0.59972800 | 0.28640300  |
| H                                            | -1.65395100  | 2.51488200  | -1.24723200 | C                                            | -1.87225000  | -1.48868500 | 0.41649600  |
| H                                            | -3.13178000  | 2.38906500  | -0.30755000 | H                                            | -1.62553900  | -0.86820900 | 1.28207200  |
| C                                            | -1.50818400  | 0.46300400  | 1.47916600  | H                                            | -1.45156000  | -2.47593400 | 0.64222500  |
| C                                            | -1.36559100  | 1.53471500  | 0.61168300  | C                                            | -1.87208000  | 1.58798600  | -0.97019200 |
| H                                            | -0.97653700  | 0.53096100  | 2.42558300  | H                                            | -2.64426000  | 1.81975600  | -1.71975900 |

|    |             |             |             |
|----|-------------|-------------|-------------|
| H  | -1.16469900 | 2.42608800  | -1.01443300 |
| C  | -1.17903000 | -0.99403200 | -0.84950400 |
| C  | -1.13622500 | 0.32219100  | -1.38966900 |
| H  | -1.00002500 | -1.79860900 | -1.56912300 |
| H  | -0.86697600 | 0.35640700  | -2.45123900 |
| Ni | 0.52449000  | -0.11245700 | -0.38803100 |

|   |            |             |             |
|---|------------|-------------|-------------|
| H | 1.58083500 | 0.87141700  | 1.34549500  |
| H | 1.58079500 | -0.87088800 | 1.34588800  |
| H | 3.90992600 | 0.00042300  | 1.49722700  |
| O | 3.90992500 | -0.00006600 | -0.52510900 |

**P1**

Sum of electronic and thermal Free Energies= -733.70725

|   |             |             |             |
|---|-------------|-------------|-------------|
| C | 0.99524500  | 0.73407500  | 0.94094700  |
| H | 0.28075000  | 1.32742400  | 1.50803100  |
| C | 2.27461800  | 1.15761200  | 0.94039200  |
| H | 2.48070000  | 2.08662500  | 1.47318500  |
| C | -5.51062800 | -0.99713100 | -0.57482100 |
| C | -4.23238800 | -1.12325300 | -0.01726900 |
| C | -3.45938400 | 0.01106300  | 0.28319400  |
| C | -4.00005700 | 1.27843800  | 0.00804900  |
| C | -5.27774200 | 1.41140100  | -0.54932900 |
| C | -6.03872500 | 0.27246200  | -0.84366800 |
| H | -6.09489800 | -1.88742500 | -0.79593500 |
| H | -3.83085800 | -2.11366300 | 0.19029600  |
| H | -3.41630100 | 2.16883100  | 0.23527500  |
| H | -5.68002700 | 2.40161500  | -0.75063500 |
| H | -7.03221900 | 0.37306200  | -1.27390900 |
| C | -2.05909300 | -0.13068200 | 0.84152000  |
| C | -1.00952600 | -0.23706100 | -0.28328600 |
| H | -1.99345700 | -1.02361600 | 1.47113800  |
| H | -1.83550400 | 0.72797900  | 1.48297400  |
| C | 0.43783200  | -0.45271700 | 0.19239500  |
| H | -1.28196000 | -1.07389000 | -0.93998400 |
| H | -1.03927300 | 0.66512800  | -0.90673000 |
| H | 1.05507400  | -0.62302900 | -0.70049300 |
| O | 0.54079800  | -1.61322100 | 1.05693300  |
| H | 0.16514800  | -2.36989100 | 0.57463800  |
| C | 3.45229800  | 0.55919300  | 0.27866700  |
| C | 4.48924200  | 1.41316400  | -0.15279400 |
| C | 3.60782300  | -0.82998000 | 0.08407700  |
| C | 5.62289400  | 0.90596000  | -0.79340500 |
| H | 4.39794700  | 2.48561700  | 0.00760300  |
| C | 4.74564400  | -1.33681300 | -0.55215900 |
| H | 2.85269500  | -1.51151800 | 0.46320400  |
| C | 5.75398200  | -0.47385300 | -1.00046300 |
| H | 6.40496300  | 1.58420500  | -1.12595800 |
| H | 4.85082600  | -2.41068100 | -0.68791300 |
| H | 6.63778800  | -0.87227200 | -1.49254100 |

**R1**

Sum of electronic and thermal Free Energies= -309.58862

|   |             |             |             |
|---|-------------|-------------|-------------|
| C | -1.78606300 | -1.04921200 | 0.00004700  |
| C | -0.40698400 | -1.28606200 | -0.00000100 |
| C | 0.51651600  | -0.22155100 | -0.00004900 |
| C | 0.01035000  | 1.09599000  | -0.00006700 |
| C | -1.36507200 | 1.33387300  | -0.00002100 |
| C | -2.27201700 | 0.26302500  | 0.00004000  |
| H | -2.47832100 | -1.88760000 | 0.00008800  |
| H | -0.03962200 | -2.31037300 | 0.00000300  |
| H | 0.69182700  | 1.94221200  | -0.00013200 |
| H | -1.73438800 | 2.35660200  | -0.00004000 |
| H | -3.34249000 | 0.45232300  | 0.00007300  |
| C | 1.95980400  | -0.53289200 | -0.00008200 |
| H | 2.19799400  | -1.59690800 | -0.00026900 |
| C | 2.98476000  | 0.33758900  | 0.00011300  |
| H | 4.01207300  | -0.01688100 | 0.00006600  |
| H | 2.84516500  | 1.41606700  | 0.00033000  |

**R2**

Sum of electronic and thermal Free Energies= -424.137215

|   |             |             |             |
|---|-------------|-------------|-------------|
| C | -2.53545100 | 1.21000200  | 0.08368700  |
| C | -1.16271200 | 1.20682300  | -0.19228500 |
| C | -0.45772800 | -0.00008300 | -0.33432800 |
| C | -1.16282700 | -1.20690200 | -0.19213300 |
| C | -2.53556800 | -1.20991300 | 0.08384100  |
| C | -3.22760300 | 0.00008600  | 0.22356200  |
| H | -3.06446500 | 2.15466500  | 0.18589200  |
| H | -0.63354900 | 2.15179000  | -0.30185700 |
| H | -0.63375500 | -2.15193300 | -0.30158200 |
| H | -3.06467200 | -2.15451300 | 0.18616700  |
| H | -4.29411600 | 0.00015100  | 0.43496400  |
| C | 1.03548800  | -0.00016300 | -0.58785600 |
| C | 1.83354200  | 0.00011800  | 0.72431100  |
| H | 1.32085400  | 0.87801700  | -1.17570900 |
| H | 1.32082600  | -0.87861700 | -1.17531200 |
| C | 3.32918100  | 0.00003500  | 0.55115100  |

|                                                           |             |             |             |   |             |             |             |
|-----------------------------------------------------------|-------------|-------------|-------------|---|-------------|-------------|-------------|
| <b>P2</b>                                                 |             |             |             | H | -1.30285700 | -2.09726900 | -0.77681800 |
| Sum of electronic and thermal Free Energies= -733.705561  |             |             |             | C | -2.97640100 | -1.95893800 | 1.40546500  |
| C                                                         | -2.08223800 | 1.35671100  | -0.69371800 | H | -1.97023400 | -0.05104000 | 1.39523500  |
| C                                                         | -2.79024000 | 1.87597000  | -1.71155400 | H | -0.88183800 | -1.42049800 | 1.60195300  |
| H                                                         | -3.60617400 | 1.32781800  | -2.17686400 | C | -3.98003300 | -1.47977000 | -0.87204400 |
| C                                                         | 4.60381000  | 0.06392300  | 0.80409900  | H | -2.99340000 | 0.43824500  | -0.97152100 |
| C                                                         | 3.25336800  | 0.37573300  | 1.00156800  | H | -2.58248300 | -0.63471200 | -2.30641900 |
| C                                                         | 2.26104100  | -0.13005400 | 0.14447200  | C | -4.23315200 | -1.51221600 | 0.64304300  |
| C                                                         | 2.65783900  | -0.95734900 | -0.91946700 | H | -3.15749400 | -1.93295500 | 2.48737800  |
| C                                                         | 4.00715900  | -1.27275300 | -1.12298200 | H | -2.74633200 | -3.00241900 | 1.14751900  |
| C                                                         | 4.98651500  | -0.76226400 | -0.26114200 | H | -4.86891800 | -1.11121400 | -1.39915900 |
| H                                                         | 5.35604400  | 0.46149200  | 1.48162600  | H | -3.80088500 | -2.50331400 | -1.23028000 |
| H                                                         | 2.96446000  | 1.01667600  | 1.83289100  | H | -5.07582200 | -2.17571000 | 0.87357200  |
| H                                                         | 1.90277400  | -1.36029500 | -1.59225700 | H | -4.51991800 | -0.50641900 | 0.98193300  |
| H                                                         | 4.29331600  | -1.91818700 | -1.95031200 | C | -0.21219800 | 1.59363800  | -0.30601900 |
| H                                                         | 6.03446600  | -1.00800800 | -0.41514600 | C | 0.30356900  | 1.81928100  | 1.13134900  |
| C                                                         | 0.80682900  | 0.24600700  | 0.33365300  | C | 0.34527300  | 2.68557400  | -1.24811500 |
| C                                                         | 0.47045200  | 1.56666900  | -0.38837300 | H | -1.30387500 | 1.72208800  | -0.28415200 |
| H                                                         | 0.58190400  | 0.35700000  | 1.39939300  | C | -0.04662600 | 3.23094400  | 1.63597900  |
| H                                                         | 0.16821100  | -0.55627100 | -0.04257700 | H | 1.39392300  | 1.70249300  | 1.15646200  |
| C                                                         | -0.92561900 | 2.16508100  | -0.11600500 | H | -0.10589000 | 1.07128900  | 1.81601100  |
| H                                                         | 1.20974900  | 2.32372900  | -0.09256000 | C | 0.01437800  | 4.09991100  | -0.74103200 |
| H                                                         | 0.58350300  | 1.43688200  | -1.47129300 | H | 1.43602400  | 2.57793400  | -1.32892000 |
| H                                                         | -0.94580300 | 3.14364000  | -0.61477700 | H | -0.05631400 | 2.54774200  | -2.25891600 |
| O                                                         | -1.15213400 | 2.36439700  | 1.29555400  | C | 0.50532300  | 4.31492400  | 0.69835200  |
| H                                                         | -0.37754200 | 2.82891900  | 1.65497200  | H | 0.34575500  | 3.36914400  | 2.65138600  |
| H                                                         | -2.57674900 | 2.86623900  | -2.10802400 | H | -1.13946600 | 3.32983500  | 1.70256800  |
| C                                                         | -2.38208400 | -0.01660700 | -0.18985100 | H | 0.45420300  | 4.84943300  | -1.41092600 |
| C                                                         | -2.52994300 | -1.07682600 | -1.10580400 | H | -1.07483900 | 4.24517200  | -0.77543400 |
| C                                                         | -2.52352600 | -0.29700500 | 1.18308400  | H | 0.21704700  | 5.31165200  | 1.05469700  |
| C                                                         | -2.81200200 | -2.37503000 | -0.66802900 | H | 1.60399100  | 4.27799700  | 0.71417000  |
| H                                                         | -2.39721300 | -0.88485600 | -2.16742800 | C | 1.41956200  | -0.89086500 | -0.07972100 |
| C                                                         | -2.80972700 | -1.59447900 | 1.62040000  | C | 1.48004900  | -2.42363200 | -0.25214700 |
| H                                                         | -2.40464400 | 0.50384200  | 1.90325600  | C | 2.76349100  | -0.26000600 | -0.50841500 |
| C                                                         | -2.95323700 | -2.64044800 | 0.69965000  | H | 1.26757200  | -0.68169400 | 0.98630800  |
| H                                                         | -2.91167700 | -3.17888600 | -1.39359700 | C | 2.67019300  | -3.03142800 | 0.51191700  |
| H                                                         | -2.91970300 | -1.78933600 | 2.68471800  | H | 1.57031700  | -2.66950000 | -1.32011000 |
| H                                                         | -3.16822200 | -3.64925200 | 1.04354500  | H | 0.55415600  | -2.88877200 | 0.10222300  |
|                                                           |             |             |             | C | 3.94816400  | -0.86106300 | 0.26611400  |
|                                                           |             |             |             | H | 2.91241300  | -0.43156800 | -1.58381300 |
|                                                           |             |             |             | H | 2.74483700  | 0.82609800  | -0.36763400 |
| <b>PCy<sub>3</sub></b>                                    |             |             |             | C | 4.00259900  | -2.38706200 | 0.10232700  |
| Sum of electronic and thermal Free Energies= -1046.842554 |             |             |             | H | 2.70262100  | -4.11515700 | 0.34389700  |
| P                                                         | 0.01624800  | -0.12597400 | -1.07502600 | H | 2.51430200  | -2.88330200 | 1.58985500  |
| C                                                         | -1.49971200 | -1.06250800 | -0.46192900 | H | 4.88600500  | -0.40615900 | -0.07623800 |
| C                                                         | -1.76631600 | -1.07425500 | 1.05558900  | H | 3.84570600  | -0.61282000 | 1.33198800  |
| C                                                         | -2.76316500 | -0.60586200 | -1.22498500 |   |             |             |             |

|   |            |             |             |
|---|------------|-------------|-------------|
| H | 4.82589000 | -2.80652100 | 0.69366600  |
| H | 4.21211000 | -2.62846400 | -0.94946500 |

**PhB(OH)<sub>2</sub>**

Sum of electronic and thermal Free Energies= -408.254108

|   |             |             |             |
|---|-------------|-------------|-------------|
| C | 1.93432600  | -1.22305500 | -0.00000400 |
| C | 0.53603000  | -1.20124400 | -0.00000600 |
| C | -0.17952400 | 0.01506100  | 0.00000100  |
| C | 0.56573900  | 1.21218800  | 0.00000900  |
| C | 1.96510900  | 1.19992300  | 0.00001200  |
| C | 2.65282600  | -0.02012400 | 0.00000400  |
| H | 2.46452100  | -2.17250900 | -0.00000900 |
| H | -0.01356800 | -2.13913800 | -0.00001100 |
| H | 0.06378900  | 2.17862600  | 0.00001700  |
| H | 2.51771100  | 2.13630100  | 0.00002000  |
| H | 3.74016300  | -0.03301400 | 0.00000700  |
| B | -1.74930900 | -0.00052800 | 0.00000200  |
| O | -2.54280000 | 1.12855600  | -0.00001800 |
| H | -2.04246700 | 1.95803700  | -0.00004200 |
| O | -2.39145900 | -1.21818900 | 0.00000700  |
| H | -3.35656800 | -1.10510000 | -0.00000100 |

**EtOH**

Sum of electronic and thermal Free Energies= -155.022738

|   |             |             |             |
|---|-------------|-------------|-------------|
| C | -1.22888600 | -0.22468700 | 0.00000600  |
| C | 0.07910900  | 0.55110100  | 0.00001300  |
| H | -1.30099500 | -0.86062500 | 0.88868900  |
| H | -2.07810700 | 0.46675100  | 0.00003700  |
| H | -1.30101700 | -0.86057500 | -0.88871000 |
| H | 0.13860400  | 1.19602000  | -0.88827700 |
| H | 0.13861700  | 1.19598000  | 0.88833200  |
| O | 1.16307900  | -0.39926100 | -0.00001500 |
| H | 1.99693100  | 0.09805700  | -0.00007000 |

**1**

Sum of electronic and thermal Free Energies= -3911.416693

|    |            |            |             |
|----|------------|------------|-------------|
| Ni | 0.02295100 | 0.66921700 | 0.71059000  |
| C  | 2.07726700 | 2.83323400 | 1.11224800  |
| C  | 3.45116100 | 2.94341900 | 1.42275300  |
| C  | 1.58095500 | 3.68615400 | 0.09862700  |
| C  | 4.28254800 | 3.85626800 | 0.76506200  |
| H  | 3.87380700 | 2.30869500 | 2.19826000  |
| C  | 2.40407600 | 4.60891400 | -0.54791200 |

|   |             |             |             |
|---|-------------|-------------|-------------|
| H | 0.53791400  | 3.60697600  | -0.19201900 |
| C | 3.76576900  | 4.70385100  | -0.22282600 |
| H | 5.33659900  | 3.90937700  | 1.03036900  |
| H | 1.98719800  | 5.24626200  | -1.32522700 |
| H | 4.40908900  | 5.41456100  | -0.73577400 |
| P | 1.57213800  | -0.80383900 | -0.04617800 |
| C | 2.85931700  | 0.14660500  | -1.03644200 |
| C | 4.18979900  | -0.48823800 | -1.50052800 |
| C | 2.16443500  | 0.84830900  | -2.22389600 |
| H | 3.11844300  | 0.93515800  | -0.32084500 |
| C | 5.11577100  | 0.59475500  | -2.08175900 |
| H | 4.01462700  | -1.22630900 | -2.28474200 |
| H | 4.68894800  | -1.02040000 | -0.68686100 |
| C | 3.08872800  | 1.87752500  | -2.89680800 |
| H | 1.85045100  | 0.09666900  | -2.96237800 |
| H | 1.25630100  | 1.34895000  | -1.86723300 |
| C | 4.44968100  | 1.28048500  | -3.28515600 |
| H | 6.07164400  | 0.14597400  | -2.38031500 |
| H | 5.34015500  | 1.34346400  | -1.30910200 |
| H | 2.59119500  | 2.29874700  | -3.78004900 |
| H | 3.24913600  | 2.70583000  | -2.19850300 |
| H | 5.10217500  | 2.06428700  | -3.69006100 |
| H | 4.31189900  | 0.53861500  | -4.08505500 |
| C | 1.04890300  | -2.29260100 | -1.10038500 |
| C | 2.11460400  | -3.03605700 | -1.92993600 |
| C | 0.25383600  | -3.30773800 | -0.25323400 |
| H | 0.35085300  | -1.84511600 | -1.81331100 |
| C | 1.50259200  | -4.18111400 | -2.76135700 |
| H | 2.89778700  | -3.43403000 | -1.27066000 |
| H | 2.59722100  | -2.34680300 | -2.62237000 |
| C | -0.38324700 | -4.41316200 | -1.10832600 |
| H | 0.92863300  | -3.78661900 | 0.46695500  |
| H | -0.51311600 | -2.79467500 | 0.32744000  |
| C | 0.68732900  | -5.16291200 | -1.91125000 |
| H | 2.30217000  | -4.70846700 | -3.29650800 |
| H | 0.84755000  | -3.74569900 | -3.52904600 |
| H | -0.93751500 | -5.10485400 | -0.46179300 |
| H | -1.11473600 | -3.97202600 | -1.79866600 |
| H | 0.22768400  | -5.92853400 | -2.54831000 |
| H | 1.35750800  | -5.68742400 | -1.21543900 |
| C | 2.49766000  | -1.61800100 | 1.38955700  |
| C | 3.68972200  | -0.80960600 | 1.94656800  |
| C | 1.50852600  | -1.89601400 | 2.54911600  |
| H | 2.88761800  | -2.57789600 | 1.02263700  |
| C | 4.38130400  | -1.55198700 | 3.10307100  |
| H | 3.33057500  | 0.15488400  | 2.31218800  |

|   |             |             |             |                                              |             |             |              |
|---|-------------|-------------|-------------|----------------------------------------------|-------------|-------------|--------------|
| H | 4.42477100  | -0.59034400 | 1.17135500  | C                                            | -3.11341800 | -0.53425900 | 1.39837600   |
| C | 2.18222900  | -2.63111900 | 3.71861500  | C                                            | -2.69720900 | -1.99524100 | 1.65329200   |
| H | 1.10489100  | -0.93532700 | 2.89449600  | C                                            | -3.04588600 | 0.24620300  | 2.72567900   |
| H | 0.64931000  | -2.47513000 | 2.20727800  | H                                            | -4.15469900 | -0.54240200 | 1.05873100   |
| C | 3.40095100  | -1.85994700 | 4.24332100  | C                                            | -3.58914900 | -2.64965400 | 2.72306800   |
| H | 5.22110200  | -0.95083600 | 3.47376400  | H                                            | -1.65343000 | -2.01251600 | 1.99104400   |
| H | 4.80769800  | -2.49224300 | 2.72539300  | H                                            | -2.74950500 | -2.58678500 | 0.73375000   |
| H | 1.45348200  | -2.78911400 | 4.52360900  | C                                            | -3.96194900 | -0.38067100 | 3.78816600   |
| H | 2.50080900  | -3.62762200 | 3.38059100  | H                                            | -2.01160800 | 0.22196600  | 3.08476900   |
| H | 3.90184000  | -2.42691600 | 5.03782400  | H                                            | -3.29633600 | 1.30211500  | 2.57837200   |
| H | 3.06300800  | -0.91461600 | 4.69121500  | C                                            | -3.58809600 | -1.85039400 | 4.03477600   |
| P | -2.08436000 | 0.30385300  | 0.06428200  | H                                            | -3.25382200 | -3.67860400 | 2.90345400   |
| C | -2.32033400 | -0.82862200 | -1.42376400 | H                                            | -4.61682400 | -2.71472000 | 2.33871000   |
| C | -3.76256600 | -1.22750100 | -1.79462400 | H                                            | -3.89432700 | 0.19058000  | 4.72241500   |
| C | -1.59611400 | -0.25184600 | -2.65930200 | H                                            | -5.00697000 | -0.31880100 | 3.45285200   |
| H | -1.78993800 | -1.74211900 | -1.13807000 | H                                            | -4.27518700 | -2.30592800 | 4.75842800   |
| C | -3.77530700 | -2.22747800 | -2.96519700 | H                                            | -2.58388800 | -1.89295100 | 4.48001700   |
| H | -4.32868300 | -0.33639700 | -2.09224300 | C                                            | 1.20979300  | 1.88446800  | 1.84091800   |
| H | -4.28247300 | -1.66268600 | -0.93443800 | C                                            | -0.18730700 | 2.11666700  | 2.02702400   |
| C | -1.61263500 | -1.23717200 | -3.83992800 | H                                            | -0.64421600 | 1.74512800  | 2.94415500   |
| H | -2.08810000 | 0.67542900  | -2.98017900 | H                                            | -0.62180000 | 3.05325000  | 1.68777300   |
| H | -0.57007000 | 0.02102200  | -2.39678900 | H                                            | 1.72745700  | 1.32286200  | 2.61710900   |
| C | -3.04516600 | -1.66406200 | -4.19385100 |                                              |             |             |              |
| H | -4.81037400 | -2.48453400 | -3.22260400 |                                              |             |             |              |
| H | -3.28824600 | -3.16004300 | -2.64779800 | <b>dist-1</b>                                |             |             |              |
| H | -1.12258700 | -0.78219200 | -4.70959900 | Sum of electronic and thermal Free Energies= |             |             | -3288.699574 |
| H | -1.02698100 | -2.12896600 | -3.58115100 | Ni                                           | -0.18021400 | -1.10617000 | -0.19774000  |
| H | -3.03243000 | -2.40505400 | -5.00253700 | P                                            | 0.97567500  | 0.81917600  | 0.06456600   |
| H | -3.59838800 | -0.79214600 | -4.57081000 | C                                            | 2.04262200  | 1.30874700  | -1.38885600  |
| C | -3.17049300 | 1.77256900  | -0.48931400 | C                                            | 2.97951400  | 2.51760300  | -1.19612800  |
| C | -4.65975100 | 1.74398400  | -0.08046600 | C                                            | 1.20078000  | 1.50669700  | -2.66899600  |
| C | -2.56336400 | 3.14360200  | -0.14943800 | H                                            | 2.66818000  | 0.42159800  | -1.54574300  |
| H | -3.14688800 | 1.69219300  | -1.58286000 | C                                            | 3.90002000  | 2.68658900  | -2.41874200  |
| C | -5.43912700 | 2.88480400  | -0.76061600 | H                                            | 2.37992500  | 3.42819100  | -1.07050600  |
| H | -4.74961100 | 1.85302500  | 1.00710600  | H                                            | 3.58563900  | 2.40886600  | -0.29097700  |
| H | -5.12479200 | 0.78932600  | -0.34011300 | C                                            | 2.11007300  | 1.65791800  | -3.89988200  |
| C | -3.33325500 | 4.28593600  | -0.83088700 | H                                            | 0.59193600  | 2.41480200  | -2.57345800  |
| H | -2.58555400 | 3.29284000  | 0.93632200  | H                                            | 0.49785200  | 0.67851200  | -2.80476400  |
| H | -1.51106700 | 3.16098000  | -0.44776800 | C                                            | 3.09494000  | 2.82441300  | -3.72059000  |
| C | -4.82216500 | 4.25742400  | -0.45537500 | H                                            | 4.54794500  | 3.56060500  | -2.27908100  |
| H | -6.48751000 | 2.85735500  | -0.43807500 | H                                            | 4.56026400  | 1.81076800  | -2.48995400  |
| H | -5.43833600 | 2.72007900  | -1.84748400 | H                                            | 1.49979600  | 1.81078600  | -4.79830000  |
| H | -2.88799100 | 5.25049100  | -0.55638700 | H                                            | 2.67079800  | 0.72506600  | -4.05240600  |
| H | -3.23193500 | 4.18914900  | -1.92137900 | H                                            | 3.77246500  | 2.88601100  | -4.58089100  |
| H | -5.36751300 | 5.04730800  | -0.98657000 | H                                            | 2.53018400  | 3.76702800  | -3.69416800  |
| H | -4.92593400 | 4.46731400  | 0.61870200  | C                                            | -0.10273000 | 2.34835300  | 0.32592300   |



|   |             |             |             |                                              |              |             |             |
|---|-------------|-------------|-------------|----------------------------------------------|--------------|-------------|-------------|
| C | 0.46263800  | 3.42511100  | 1.27658300  | H                                            | 1.10576800   | -3.69227900 | 0.42684300  |
| C | -1.55278900 | 1.99421700  | 0.711178400 | C                                            | 4.47659800   | -3.65350600 | -0.08279100 |
| H | -0.14513700 | 2.79725800  | -0.67456000 | H                                            | 5.47067700   | -2.53503500 | -1.64118900 |
| C | -0.43503600 | 4.67564500  | 1.28434500  | H                                            | 3.19245400   | -4.63868900 | 1.35014300  |
| H | 0.52066600  | 3.02653400  | 2.29652500  | H                                            | 5.39621500   | -4.05242200 | 0.33792100  |
| H | 1.48011700  | 3.70768700  | 0.98984400  | C                                            | -3.07041100  | -1.69026200 | -0.05285600 |
| C | -2.44641900 | 3.24375000  | 0.72516200  | H                                            | -3.29465300  | -2.52433700 | -0.72682600 |
| H | -1.56546000 | 1.51489700  | 1.69613100  | H                                            | -2.97532500  | -0.78720100 | -0.66537100 |
| H | -1.94724300 | 1.24723900  | 0.01633500  | C                                            | -4.23002600  | -1.49002000 | 0.95247400  |
| C | -1.88455200 | 4.32888300  | 1.65590700  | H                                            | -4.38618800  | -2.41710900 | 1.51636700  |
| H | -0.02794000 | 5.41637400  | 1.98372900  | H                                            | -3.92376900  | -0.72072200 | 1.66945800  |
| H | -0.41616500 | 5.13772800  | 0.28716000  | C                                            | -5.50856400  | -1.07232900 | 0.26114000  |
| H | -3.46392100 | 2.96856800  | 1.03139100  | C                                            | -5.72523200  | 0.27657100  | -0.07235700 |
| H | -2.52208200 | 3.64628500  | -0.29526900 | C                                            | -6.47988500  | -2.01561300 | -0.11187700 |
| H | -2.51201900 | 5.22798500  | 1.61965200  | C                                            | -6.87993500  | 0.67325300  | -0.75605400 |
| H | -1.91210500 | 3.96361900  | 2.69232700  | H                                            | -4.98211500  | 1.02111900  | 0.20882400  |
| C | 2.15058500  | 0.75147100  | 1.51829300  | C                                            | -7.63792600  | -1.62482000 | -0.79673800 |
| C | 3.35589500  | -0.16656400 | 1.22933400  | H                                            | -6.32953400  | -3.06453400 | 0.13749600  |
| C | 1.40238400  | 0.25862900  | 2.77528100  | C                                            | -7.84236600  | -0.27788500 | -1.12207500 |
| H | 2.52725700  | 1.76369700  | 1.70816000  | H                                            | -7.03103900  | 1.72223900  | -1.00066200 |
| C | 4.29563000  | -0.25600900 | 2.44257600  | H                                            | -8.38033000  | -2.36998500 | -1.07336900 |
| H | 2.99429600  | -1.16925700 | 0.98267100  | H                                            | -8.74161900  | 0.02793000  | -1.65133200 |
| H | 3.91935700  | 0.18477000  | 0.35977100  | H                                            | -1.56562900  | -2.98384800 | 0.97465400  |
| C | 2.34068600  | 0.17360600  | 3.98937700  |                                              |              |             |             |
| H | 0.97312400  | -0.72741400 | 2.56365600  |                                              |              |             |             |
| H | 0.55346600  | 0.91254600  | 3.00197300  | <b>dist-TS1</b>                              |              |             |             |
| C | 3.54919000  | -0.72873800 | 3.69820600  | Sum of electronic and thermal Free Energies= | -3851.949911 |             |             |
| H | 5.12419700  | -0.93689900 | 2.21150800  | C                                            | 0.23299600   | -0.31619200 | -2.20678100 |
| H | 4.73887200  | 0.73179700  | 2.63376100  | C                                            | 0.60740300   | 1.15820700  | -2.51571100 |
| H | 1.78613700  | -0.19984700 | 4.85932700  | Ni                                           | 0.53656900   | 0.37835300  | -0.50015100 |
| H | 2.69459700  | 1.18182400  | 4.24828500  | C                                            | 1.73451700   | 1.96696600  | -1.60344000 |
| H | 4.22699900  | -0.75191000 | 4.56054100  | H                                            | 1.67522600   | 2.96475300  | -2.06435900 |
| H | 3.19898400  | -1.75872300 | 3.54010300  | C                                            | 3.12852000   | 1.36579700  | -1.84829500 |
| C | -0.42760600 | -2.55877600 | -1.57631900 | H                                            | 3.33257600   | 1.30953800  | -2.92477900 |
| C | 0.84711500  | -1.97851200 | -1.70722300 | H                                            | 3.14197900   | 0.33734100  | -1.46652400 |
| C | -1.75623700 | -1.94132600 | 0.66961900  | C                                            | 4.23830300   | 2.17287000  | -1.15095400 |
| O | -1.25062900 | -0.99082500 | 1.40524400  | H                                            | 4.29055300   | 3.17202500  | -1.60096800 |
| H | -0.54845200 | -3.55586200 | -1.15890800 | H                                            | 3.95465700   | 2.30259600  | -0.10265900 |
| H | -1.21901000 | -2.25431000 | -2.25951800 | C                                            | 5.58005000   | 1.48150300  | -1.25048300 |
| H | 1.01169600  | -1.28025900 | -2.52397700 | C                                            | 6.42505600   | 1.68488700  | -2.35455100 |
| C | 2.08079400  | -2.58815800 | -1.15764700 | C                                            | 5.98425800   | 0.56705300  | -0.26339400 |
| C | 3.33248600  | -2.27757900 | -1.72228300 | C                                            | 7.63810000   | 0.99473900  | -2.47011000 |
| C | 2.05595500  | -3.45934700 | -0.04690400 | H                                            | 6.13029900   | 2.39024500  | -3.12969400 |
| C | 4.51640400  | -2.79943800 | -1.19140700 | C                                            | 7.19350300   | -0.12856300 | -0.37354000 |
| H | 3.37976500  | -1.61461200 | -2.58375900 | H                                            | 5.34392400   | 0.39949900  | 0.59958300  |
| C | 3.23640500  | -3.98346900 | 0.48317100  | C                                            | 8.02659200   | 0.08239000  | -1.47983500 |

|   |             |             |             |   |             |             |             |
|---|-------------|-------------|-------------|---|-------------|-------------|-------------|
| H | 8.27997700  | 1.16875100  | -3.33079100 | H | 3.03807100  | -0.47342200 | 0.93371100  |
| H | 7.48378100  | -0.83405000 | 0.40173600  | H | 2.66318300  | -0.82197400 | 2.61549300  |
| H | 8.96793500  | -0.45465100 | -1.56817400 | C | -3.65009500 | -4.01552500 | 0.68890600  |
| H | 1.09256600  | 1.16826100  | -3.49547200 | H | -2.25002500 | -5.61033100 | 1.17774300  |
| H | -0.28020700 | 1.79348200  | -2.57847000 | H | -1.98875400 | -4.87261200 | -0.40224100 |
| H | 1.04001100  | -1.00062900 | -2.48768200 | H | -4.64016100 | -2.17263600 | 0.08465600  |
| C | -1.07508500 | -0.81789000 | -2.69041600 | H | -3.45966600 | -2.77007000 | -1.07168800 |
| C | -1.15762600 | -2.10058900 | -3.27153000 | C | -0.06866700 | 0.74586300  | 5.33874200  |
| C | -2.26514800 | -0.06687700 | -2.58777000 | H | -0.57276000 | -1.27941100 | 5.95531200  |
| C | -2.37139600 | -2.60544400 | -3.74838800 | H | -1.80631000 | -0.49018400 | 4.97441300  |
| H | -0.25579500 | -2.70431500 | -3.35436000 | H | 0.31145800  | 2.60938000  | 4.27923700  |
| C | -3.47861100 | -0.56917100 | -3.05881100 | H | -1.25946300 | 1.88902500  | 3.93580900  |
| H | -2.24232500 | 0.91451700  | -2.12376900 | C | 4.51015500  | -2.85288200 | 0.47288800  |
| C | -3.53875600 | -1.83870000 | -3.65081000 | H | 3.56046400  | -4.19019800 | -0.95678100 |
| H | -2.40529200 | -3.59709100 | -4.19370500 | H | 3.15069300  | -4.52045400 | 0.72582200  |
| H | -4.38156500 | 0.02476500  | -2.94698100 | H | 4.99933600  | -1.47819400 | 2.08749500  |
| H | -4.48571800 | -2.22982400 | -4.01448800 | H | 4.03544300  | -2.86430200 | 2.58262100  |
| P | 0.14670400  | -1.13624900 | 0.95042800  | H | -4.38601000 | -4.68009900 | 0.21969000  |
| C | -1.19104200 | -2.36185900 | 0.51325900  | H | -3.95474200 | -3.89591300 | 1.73850600  |
| C | -0.31802800 | -0.37826500 | 2.59861300  | H | -0.51768000 | 1.22505900  | 6.21715800  |
| C | 1.69494900  | -2.15129100 | 1.18016400  | H | 0.99694300  | 0.60076500  | 5.56580000  |
| C | -1.18638500 | -3.72129000 | 1.24379300  | H | 5.40567600  | -3.47190300 | 0.60531200  |
| C | -2.58781200 | -1.71244000 | 0.59283800  | H | 4.74956300  | -2.11123500 | -0.30070000 |
| H | -0.99069600 | -2.55515000 | -0.54763200 | O | 1.47054300  | 2.07756100  | -0.21983800 |
| C | -0.16534100 | -1.30143400 | 3.82495400  | B | -3.20252900 | 2.39723100  | -0.08572400 |
| C | 0.37458900  | 0.97970600  | 2.85180100  | C | -4.60049100 | 1.78312900  | -0.44952900 |
| H | -1.38371200 | -0.15674700 | 2.46303400  | C | -5.32206300 | 2.23733300  | -1.57141900 |
| C | 2.05205600  | -2.86874800 | -0.14030700 | C | -5.16003000 | 0.74348500  | 0.31761900  |
| C | 2.88460400  | -1.28902600 | 1.65236900  | C | -6.55282800 | 1.67085900  | -1.92150200 |
| H | 1.48424500  | -2.90474800 | 1.94986300  | H | -4.90543900 | 3.03540800  | -2.18146700 |
| C | -2.25341200 | -4.65339600 | 0.64166200  | C | -6.38896600 | 0.16925400  | -0.02531600 |
| H | -1.40528500 | -3.57643500 | 2.30756900  | H | -4.61741400 | 0.37425800  | 1.18372300  |
| H | -0.20592900 | -4.20344000 | 1.18384100  | C | -7.08786700 | 0.63109200  | -1.14850900 |
| C | -3.65486800 | -2.64389600 | -0.00120200 | H | -7.09152800 | 2.03099900  | -2.79512000 |
| H | -2.84003800 | -1.51212400 | 1.64238700  | H | -6.80043700 | -0.63855300 | 0.57577700  |
| H | -2.59224300 | -0.74887500 | 0.07656200  | H | -8.04126800 | 0.18368000  | -1.42033900 |
| C | -0.72155000 | -0.62209800 | 5.09000500  | O | -2.67068700 | 3.36392500  | -0.91096800 |
| H | 0.89491600  | -1.53811200 | 3.97928900  | H | -1.80060700 | 3.66587100  | -0.55376400 |
| H | -0.68054400 | -2.25239600 | 3.66754600  | O | -2.54265400 | 1.94059700  | 1.03347200  |
| C | -0.19968000 | 1.65428600  | 4.10712600  | H | -1.67787900 | 2.40632300  | 1.11253200  |
| H | 1.45257600  | 0.83718900  | 2.98522400  | C | 0.09097200  | 4.59937600  | 1.46570500  |
| H | 0.25883000  | 1.63212400  | 1.98503600  | C | -1.07925100 | 5.14683900  | 2.27096700  |
| C | 3.32831100  | -3.71237600 | 0.00263800  | H | 0.58720100  | 5.40636300  | 0.90886700  |
| H | 2.20992100  | -2.10904300 | -0.91565600 | H | 0.83541400  | 4.14702100  | 2.13469600  |
| H | 1.22518300  | -3.49924600 | -0.48308100 | H | -0.73869300 | 5.92803000  | 2.95898200  |
| C | 4.16898600  | -2.12535700 | 1.78024600  | H | -1.83569400 | 5.57709900  | 1.60582500  |

|                                              |              |             |             |   |             |             |             |
|----------------------------------------------|--------------|-------------|-------------|---|-------------|-------------|-------------|
| H                                            | -1.54861000  | 4.35010200  | 2.85732500  | C | -1.48463400 | 2.65651200  | 0.12960700  |
| O                                            | -0.39107600  | 3.60565900  | 0.54913000  | C | 1.57239600  | 3.99132000  | 0.34727300  |
| H                                            | 0.39549300   | 3.04172300  | 0.18508900  | C | 2.78924000  | 1.76639800  | 0.23354600  |
|                                              |              |             |             | H | 1.37333000  | 2.49464700  | -1.19271100 |
|                                              |              |             |             | C | -0.41414100 | 2.72102500  | 3.16397900  |
| <b>dist-2</b>                                |              |             |             | C | -0.43026000 | 0.18652200  | 2.92307700  |
| Sum of electronic and thermal Free Energies= | -3851.978858 |             |             | H | 1.23182000  | 1.48259400  | 2.55410400  |
| C                                            | -0.31917900  | -0.66836800 | -1.95907600 | C | -1.55727000 | 3.00773400  | -1.37109800 |
| C                                            | -0.57819200  | -2.16882500 | -2.22973400 | C | -2.78622200 | 1.94638000  | 0.56530300  |
| Ni                                           | -0.45350800  | -0.51535400 | -0.03392700 | H | -1.38539300 | 3.58758700  | 0.70088000  |
| C                                            | -1.64216400  | -2.66499600 | -1.25180500 | C | 2.78198300  | 4.68539000  | -0.30255000 |
| H                                            | -1.66752400  | -3.76673500 | -1.24074200 | H | 1.68471400  | 4.03477700  | 1.43756100  |
| C                                            | -3.04993100  | -2.14639000 | -1.57671300 | H | 0.65573100  | 4.53608500  | 0.09805900  |
| H                                            | -3.34357500  | -2.47019900 | -2.58408500 | C | 3.99892600  | 2.46630000  | -0.40628300 |
| H                                            | -3.02355800  | -1.05041500 | -1.58204600 | H | 2.93477600  | 1.73876100  | 1.32137500  |
| C                                            | -4.10241900  | -2.60509800 | -0.55160200 | H | 2.72771800  | 0.72920400  | -0.10560800 |
| H                                            | -4.21738500  | -3.69432800 | -0.61092500 | C | -0.16388600 | 2.56183500  | 4.67396900  |
| H                                            | -3.72071000  | -2.37181700 | 0.44778500  | H | -1.49386900 | 2.80515500  | 2.99682300  |
| C                                            | -5.43504000  | -1.92466400 | -0.77326600 | H | 0.03172000  | 3.65486200  | 2.80959000  |
| C                                            | -6.43695900  | -2.51464300 | -1.56125300 | C | -0.20996200 | 0.04193000  | 4.43746500  |
| C                                            | -5.67407900  | -0.64404500 | -0.24401600 | H | -1.50307400 | 0.12491600  | 2.70087800  |
| C                                            | -7.64205900  | -1.84658300 | -1.81531100 | H | 0.04790100  | -0.66545300 | 2.42201400  |
| H                                            | -6.27196300  | -3.50581400 | -1.98020300 | C | -2.79803000 | 3.85942400  | -1.68778700 |
| C                                            | -6.87331400  | 0.03051500  | -0.49649400 | H | -1.60631100 | 2.07873700  | -1.95080800 |
| H                                            | -4.91038200  | -0.17445400 | 0.37189500  | H | -0.65515300 | 3.53690500  | -1.69464300 |
| C                                            | -7.86438400  | -0.56903600 | -1.28557300 | C | -4.02230800 | 2.80543900  | 0.25712900  |
| H                                            | -8.40633500  | -2.32253100 | -2.42559500 | H | -2.85993300 | 0.99037000  | 0.02967300  |
| H                                            | -7.03680000  | 1.02114300  | -0.07809300 | H | -2.76427000 | 1.70236900  | 1.63148600  |
| H                                            | -8.79859500  | -0.04849200 | -1.48207900 | C | 4.08829700  | 3.94113100  | 0.01167300  |
| H                                            | -0.85276000  | -2.32774400 | -3.28403400 | H | 2.83983100  | 5.72498400  | 0.04226900  |
| H                                            | 0.33544000   | -2.74048200 | -2.04187400 | H | 2.63386700  | 4.71863300  | -1.39096700 |
| H                                            | -1.16932500  | -0.06948600 | -2.30636100 | H | 4.91619600  | 1.93423800  | -0.13232900 |
| C                                            | 0.94566700   | -0.13896400 | -2.54223500 | H | 3.91094700  | 2.39819400  | -1.49697200 |
| C                                            | 0.94205800   | 0.99935500  | -3.37292800 | C | -0.76179600 | 1.25088000  | 5.20609200  |
| C                                            | 2.18457900   | -0.76918600 | -2.30318900 | H | -0.58967600 | 3.41989500  | 5.20776100  |
| C                                            | 2.12250500   | 1.48089500  | -3.94930400 | H | 0.91806800  | 2.57321900  | 4.86510700  |
| H                                            | 0.00289100   | 1.50786600  | -3.57728500 | H | -0.67640600 | -0.88542100 | 4.78999900  |
| C                                            | 3.36624900   | -0.29001100 | -2.86834500 | H | 0.86735800  | -0.05140200 | 4.63085100  |
| H                                            | 2.22138300   | -1.63334500 | -1.64801100 | C | -4.09094500 | 3.16612900  | -1.23286100 |
| C                                            | 3.34102100   | 0.83761900  | -3.70122500 | H | -2.83360300 | 4.06706100  | -2.76397300 |
| H                                            | 2.09058100   | 2.36089100  | -4.58774500 | H | -2.70746000 | 4.82954300  | -1.17983400 |
| H                                            | 4.30720100   | -0.78481700 | -2.64240700 | H | -4.92924900 | 2.27234500  | 0.56456200  |
| H                                            | 4.26129800   | 1.21710600  | -4.13857800 | H | -3.98000100 | 3.72578800  | 0.85597300  |
| P                                            | -0.00333300  | 1.58437400  | 0.50597200  | H | 4.93273100  | 4.42780300  | -0.49159400 |
| C                                            | 1.48399800   | 2.51885300  | -0.10160800 | H | 4.28507800  | 4.00172700  | 1.09160300  |
| C                                            | 0.14893500   | 1.51630400  | 2.38214900  | H | -0.55317500 | 1.14438900  | 6.27726300  |

|                                              |              |             |             |   |             |             |             |
|----------------------------------------------|--------------|-------------|-------------|---|-------------|-------------|-------------|
| H                                            | -1.85486900  | 1.28189900  | 5.09614800  | C | 5.98425800  | 0.56705300  | -0.26339400 |
| H                                            | -4.95735700  | 3.80831900  | -1.43098000 | C | 7.63810000  | 0.99473900  | -2.47011000 |
| H                                            | -4.23588400  | 2.24690500  | -1.81755200 | H | 6.13029900  | 2.39024500  | -3.12969400 |
| O                                            | -1.22861600  | -2.19697500 | 0.03059200  | C | 7.19350300  | -0.12856300 | -0.37354000 |
| B                                            | 3.12485300   | -2.63467000 | 0.66898600  | H | 5.34392400  | 0.39949900  | 0.59958300  |
| C                                            | 4.49410100   | -2.21245800 | 0.02746500  | C | 8.02659200  | 0.08239000  | -1.47983500 |
| C                                            | 5.10160600   | -3.00327700 | -0.96809600 | H | 8.27997700  | 1.16875100  | -3.33079100 |
| C                                            | 5.13490000   | -1.01564100 | 0.40138300  | H | 7.48378100  | -0.83405000 | 0.40173600  |
| C                                            | 6.30109700   | -2.61304400 | -1.57420400 | H | 8.96793500  | -0.45465100 | -1.56817400 |
| H                                            | 4.61998400   | -3.92788300 | -1.27750100 | H | 1.09256600  | 1.16826100  | -3.49547200 |
| C                                            | 6.33724200   | -0.62014900 | -0.19476900 | H | -0.28020700 | 1.79348200  | -2.57847000 |
| H                                            | 4.67729900   | -0.38461900 | 1.15868600  | H | 1.04001100  | -1.00062900 | -2.48768200 |
| C                                            | 6.92215500   | -1.41768100 | -1.18715100 | C | -1.07508500 | -0.81789000 | -2.69041600 |
| H                                            | 6.74968000   | -3.23269100 | -2.34741500 | C | -1.15762600 | -2.10058900 | -3.27153000 |
| H                                            | 6.81659600   | 0.30869400  | 0.10572400  | C | -2.26514800 | -0.06687700 | -2.58777000 |
| H                                            | 7.85296700   | -1.10881300 | -1.65740900 | C | -2.37139600 | -2.60544400 | -3.74838800 |
| O                                            | 2.55938600   | -3.83226400 | 0.28490500  | H | -0.25579500 | -2.70431500 | -3.35436000 |
| H                                            | 1.70836900   | -3.97259200 | 0.75900300  | C | -3.47861100 | -0.56917100 | -3.05881100 |
| O                                            | 2.52045700   | -1.79395600 | 1.57582800  | H | -2.24232500 | 0.91451700  | -2.12376900 |
| H                                            | 1.64453200   | -2.17034500 | 1.82931800  | C | -3.53875600 | -1.83870000 | -3.65081000 |
| C                                            | -0.47765800  | -3.70340900 | 2.90662500  | H | -2.40529200 | -3.59709100 | -4.19370500 |
| C                                            | 0.48252600   | -3.84605600 | 4.07867000  | H | -4.38156500 | 0.02476500  | -2.94698100 |
| H                                            | -1.02057300  | -4.64302100 | 2.73572400  | H | -4.48571800 | -2.22982400 | -4.01448800 |
| H                                            | -1.21946600  | -2.92009400 | 3.11195500  | P | 0.14670400  | -1.13624900 | 0.95042800  |
| H                                            | -0.06023500  | -4.13699300 | 4.98434200  | C | -1.19104200 | -2.36185900 | 0.51325900  |
| H                                            | 1.23679500   | -4.61107400 | 3.86568000  | C | -0.31802800 | -0.37826500 | 2.59861300  |
| H                                            | 0.99671100   | -2.89924900 | 4.27451000  | C | 1.69494900  | -2.15129100 | 1.18016400  |
| O                                            | 0.26578100   | -3.35447500 | 1.72810900  | C | -1.18638500 | -3.72129000 | 1.24379300  |
| H                                            | -0.36864000  | -2.99049200 | 1.01017300  | C | -2.58781200 | -1.71244000 | 0.59283800  |
|                                              |              |             |             | H | -0.99069600 | -2.55515000 | -0.54763200 |
|                                              |              |             |             | C | -0.16534100 | -1.30143400 | 3.82495400  |
| <b>dist-3</b>                                |              |             |             | C | 0.37458900  | 0.97970600  | 2.85180100  |
| Sum of electronic and thermal Free Energies= | -3696.954608 |             |             | H | -1.38371200 | -0.15674700 | 2.46303400  |
| C                                            | 0.23299600   | -0.31619200 | -2.20678100 | C | 2.05205600  | -2.86874800 | -0.14030700 |
| C                                            | 0.60740300   | 1.15820700  | -2.51571100 | C | 2.88460400  | -1.28902600 | 1.65236900  |
| Ni                                           | 0.53656900   | 0.37835300  | -0.50015100 | H | 1.48424500  | -2.90474800 | 1.94986300  |
| C                                            | 1.73451700   | 1.96696600  | -1.60344000 | C | -2.25341200 | -4.65339600 | 0.64166200  |
| H                                            | 1.67522600   | 2.96475300  | -2.06435900 | H | -1.40528500 | -3.57643500 | 2.30756900  |
| C                                            | 3.12852000   | 1.36579700  | -1.84829500 | H | -0.20592900 | -4.20344000 | 1.18384100  |
| H                                            | 3.33257600   | 1.30953800  | -2.92477900 | C | -3.65486800 | -2.64389600 | -0.00120200 |
| H                                            | 3.14197900   | 0.33734100  | -1.46652400 | H | -2.84003800 | -1.51212400 | 1.64238700  |
| C                                            | 4.23830300   | 2.17287000  | -1.15095400 | H | -2.59224300 | -0.74887500 | 0.07656200  |
| H                                            | 4.29055300   | 3.17202500  | -1.60096800 | C | -0.72155000 | -0.62209800 | 5.09000500  |
| H                                            | 3.95465700   | 2.30259600  | -0.10265900 | H | 0.89491600  | -1.53811200 | 3.97928900  |
| C                                            | 5.58005000   | 1.48150300  | -1.25048300 | H | -0.68054400 | -2.25239600 | 3.66754600  |
| C                                            | 6.42505600   | 1.68488700  | -2.35455100 | C | -0.19968000 | 1.65428600  | 4.10712600  |

|   |             |             |             |                                              |              |             |             |
|---|-------------|-------------|-------------|----------------------------------------------|--------------|-------------|-------------|
| H | 1.45257600  | 0.83718900  | 2.98522400  | C                                            | 0.09097200   | 4.59937600  | 1.46570500  |
| H | 0.25883000  | 1.63212400  | 1.98503600  | C                                            | -1.07925100  | 5.14683900  | 2.27096700  |
| C | 3.32831100  | -3.71237600 | 0.00263800  | H                                            | 0.58720100   | 5.40636300  | 0.90886700  |
| H | 2.20992100  | -2.10904300 | -0.91565600 | H                                            | 0.83541400   | 4.14702100  | 2.13469600  |
| H | 1.22518300  | -3.49924600 | -0.48308100 | H                                            | -0.73869300  | 5.92803000  | 2.95898200  |
| C | 4.16898600  | -2.12535700 | 1.78024600  | H                                            | -1.83569400  | 5.57709900  | 1.60582500  |
| H | 3.03807100  | -0.47342200 | 0.93371100  | H                                            | -1.54861000  | 4.35010200  | 2.85732500  |
| H | 2.66318300  | -0.82197400 | 2.61549300  | O                                            | -0.39107600  | 3.60565900  | 0.54913000  |
| C | -3.65009500 | -4.01552500 | 0.68890600  | H                                            | 0.39549300   | 3.04172300  | 0.18508900  |
| H | -2.25002500 | -5.61033100 | 1.17774300  |                                              |              |             |             |
| H | -1.98875400 | -4.87261200 | -0.40224100 |                                              |              |             |             |
| H | -4.64016100 | -2.17263600 | 0.08465600  | <b>dist-TS2</b>                              |              |             |             |
| H | -3.45966600 | -2.77007000 | -1.07168800 | Sum of electronic and thermal Free Energies= | -3696.937293 |             |             |
| C | -0.06866700 | 0.74586300  | 5.33874200  | Ni                                           | 0.25537100   | -0.59133100 | -0.00971700 |
| H | -0.57276000 | -1.27941100 | 5.95531200  | C                                            | 2.08561400   | -2.67082000 | 0.08113500  |
| H | -1.80631000 | -0.49018400 | 4.97441300  | H                                            | 2.37230100   | -3.69817100 | -0.18409800 |
| H | 0.31145800  | 2.60938000  | 4.27923700  | C                                            | 0.54519300   | -2.50600700 | 0.05615000  |
| H | -1.25946300 | 1.88902500  | 3.93580900  | H                                            | 0.13994800   | -2.96346700 | 0.95861800  |
| C | 4.51015500  | -2.85288200 | 0.47288800  | C                                            | 7.97499400   | 0.93906600  | 0.32383100  |
| H | 3.56046400  | -4.19019800 | -0.95678100 | C                                            | 6.62367800   | 0.57788200  | 0.37639000  |
| H | 3.15069300  | -4.52045400 | 0.72582200  | C                                            | 6.23785700   | -0.73896100 | 0.68180100  |
| H | 4.99933600  | -1.47819400 | 2.08749500  | C                                            | 7.24362100   | -1.68729300 | 0.93096300  |
| H | 4.03544300  | -2.86430200 | 2.58262100  | C                                            | 8.59772600   | -1.33243900 | 0.87917100  |
| H | -4.38601000 | -4.68009900 | 0.21969000  | C                                            | 8.96895800   | -0.01648900 | 0.57496700  |
| H | -3.95474200 | -3.89591300 | 1.73850600  | H                                            | 8.25260400   | 1.96450800  | 0.09066800  |
| H | -0.51768000 | 1.22505900  | 6.21715800  | H                                            | 5.85758600   | 1.32647800  | 0.18083800  |
| H | 0.99694300  | 0.60076500  | 5.56580000  | H                                            | 6.96435300   | -2.71195500 | 1.17022100  |
| H | 5.40567600  | -3.47190300 | 0.60531200  | H                                            | 9.36125100   | -2.08084800 | 1.07882300  |
| H | 4.74956300  | -2.11123500 | -0.30070000 | H                                            | 10.01930400  | 0.26216200  | 0.53717600  |
| O | 1.47054300  | 2.07756100  | -0.21983800 | C                                            | 4.77572600   | -1.12919500 | 0.69056700  |
| B | -3.20252900 | 2.39723100  | -0.08572400 | C                                            | 4.27864300   | -1.51989500 | -0.71635500 |
| C | -4.60049100 | 1.78312900  | -0.44952900 | H                                            | 4.16914900   | -0.29272600 | 1.05324500  |
| C | -5.32206300 | 2.23733300  | -1.57141900 | H                                            | 4.62184000   | -1.96248000 | 1.38367700  |
| C | -5.16003000 | 0.74348500  | 0.31761900  | C                                            | 2.76024000   | -1.66008900 | -0.83932000 |
| C | -6.55282800 | 1.67085900  | -1.92150200 | H                                            | 4.59688500   | -0.75117000 | -1.43094700 |
| H | -4.90543900 | 3.03540800  | -2.18146700 | H                                            | 4.75074400   | -2.45821800 | -1.03248400 |
| C | -6.38896600 | 0.16925400  | -0.02531600 | H                                            | 2.52433400   | -1.89431000 | -1.88313700 |
| H | -4.61741400 | 0.37425800  | 1.18372300  | O                                            | 2.12579100   | -0.40705100 | -0.48652300 |
| C | -7.08786700 | 0.63109200  | -1.14850900 | C                                            | -0.20452200  | 6.10513400  | -0.91969600 |
| H | -7.09152800 | 2.03099900  | -2.79512000 | C                                            | 0.56010900   | 4.96168300  | -0.66136100 |
| H | -6.80043700 | -0.63855300 | 0.57577700  | C                                            | 0.29805000   | 3.73949100  | -1.31205800 |
| H | -8.04126800 | 0.18368000  | -1.42033900 | C                                            | -0.74930200  | 3.71321200  | -2.25374800 |
| O | -2.67068700 | 3.36392500  | -0.91096800 | C                                            | -1.52126800  | 4.84985400  | -2.52091000 |
| H | -1.80060700 | 3.66587100  | -0.55376400 | C                                            | -1.25349200  | 6.04991100  | -1.84797400 |
| O | -2.54265400 | 1.94059700  | 1.03347200  | H                                            | 0.00929200   | 7.03503700  | -0.39685000 |
| H | -1.67787900 | 2.40632300  | 1.11253200  | H                                            | 1.36562700   | 5.01089400  | 0.06766800  |

|   |             |             |             |                                              |              |             |             |
|---|-------------|-------------|-------------|----------------------------------------------|--------------|-------------|-------------|
| H | -0.96026900 | 2.78166300  | -2.77150800 | H                                            | -1.70814600  | 0.39132200  | -2.11721500 |
| H | -2.33090400 | 4.80233500  | -3.24635800 | H                                            | -2.55228400  | 1.73419600  | -1.37650100 |
| H | -1.85506700 | 6.93438300  | -2.04608600 | C                                            | -4.45406600  | -1.62328800 | -2.20817600 |
| B | 1.09049500  | 2.41165900  | -0.97289800 | H                                            | -2.47292500  | -2.06166700 | -1.49595900 |
| O | 2.14494300  | 2.54908600  | -0.05516000 | H                                            | -3.71528500  | -2.29693000 | -0.28308100 |
| H | 2.50613800  | 1.66834300  | 0.15310700  | C                                            | -1.51000500  | 4.04303400  | 2.89543600  |
| O | 0.74509500  | 1.21845500  | -1.50169000 | H                                            | -3.46039700  | 4.40940900  | 2.00291400  |
| H | 1.72529300  | 0.30773900  | -1.22825400 | H                                            | -2.14235400  | 4.27353300  | 0.83689100  |
| C | -0.14511200 | -3.10283500 | -1.13817700 | H                                            | 0.45624100   | 3.31236800  | 3.47182700  |
| C | -0.93703600 | -4.25652200 | -0.97571800 | H                                            | 0.27745400   | 3.62839800  | 1.74877600  |
| C | -0.06111000 | -2.54837500 | -2.43391800 | C                                            | -4.15376300  | -2.98657500 | 3.84833700  |
| C | -1.62062400 | -4.83124300 | -2.05273500 | H                                            | -5.70141900  | -1.46348300 | 3.69625800  |
| H | -1.03046900 | -4.70058600 | 0.01309200  | H                                            | -4.23247700  | -0.92671400 | 4.50991500  |
| C | -0.74227000 | -3.11780700 | -3.51225300 | H                                            | -2.30677800  | -4.13916900 | 3.84834400  |
| H | 0.49392700  | -1.62791500 | -2.59079200 | H                                            | -2.18211200  | -2.56004000 | 4.61979600  |
| C | -1.52798000 | -4.26344300 | -3.32891900 | C                                            | -4.02070500  | -0.71516300 | -3.36822700 |
| H | -2.23331700 | -5.71559200 | -1.89297200 | H                                            | -3.37026600  | 1.33798200  | -3.69036100 |
| H | -0.67669800 | -2.65465900 | -4.49398300 | H                                            | -4.65759300  | 1.15981800  | -2.50025300 |
| H | -2.06925900 | -4.69817500 | -4.16553400 | H                                            | -4.61833500  | -2.64697900 | -2.56561900 |
| H | 2.42125500  | -2.48834600 | 1.10675300  | H                                            | -5.41181400  | -1.26782900 | -1.80198200 |
| P | -1.79670600 | -0.21742700 | 0.74973100  | H                                            | -1.25817400  | 5.10485700  | 3.00621400  |
| C | -1.58743800 | 1.58200300  | 1.23560300  | H                                            | -1.95527900  | 3.72133200  | 3.84778100  |
| C | -2.54842900 | -1.03749700 | 2.26416900  | H                                            | -4.51192100  | -3.38515500 | 4.80511100  |
| C | -3.10802500 | -0.21405200 | -0.57661900 | H                                            | -4.60460300  | -3.60310900 | 3.05786900  |
| C | -2.87165200 | 2.36883400  | 1.55985200  | H                                            | -4.79340700  | -0.69226400 | -4.14649000 |
| C | -0.55216500 | 1.74207100  | 2.37246100  | H                                            | -3.11450100  | -1.13290500 | -3.82775200 |
| H | -1.14762800 | 2.02305600  | 0.33447800  |                                              |              |             |             |
| C | -4.08917600 | -0.94290000 | 2.34823500  |                                              |              |             |             |
| C | -2.07303600 | -2.49025900 | 2.46405200  | <b>dist-4</b>                                |              |             |             |
| H | -2.13850500 | -0.45230500 | 3.09703400  | Sum of electronic and thermal Free Energies= | -3696.950552 |             |             |
| C | -2.68564500 | 0.71065300  | -1.73595700 | Ni                                           | 0.01603600   | -0.60718000 | -0.36481800 |
| C | -3.39439500 | -1.63750700 | -1.09563200 | C                                            | 1.27175700   | -3.01800400 | 0.19506300  |
| H | -4.02611300 | 0.18698400  | -0.13056600 | H                                            | 1.32825400   | -4.11514900 | 0.24327500  |
| C | -2.54114800 | 3.85727000  | 1.77183000  | C                                            | -0.17520000  | -2.53481600 | -0.06612000 |
| H | -3.32820500 | 1.97096300  | 2.47469500  | H                                            | -0.75736600  | -2.82833500 | 0.80242100  |
| H | -3.61050700 | 2.26458800  | 0.75865200  | C                                            | 7.37422200   | 0.04241300  | 0.33508000  |
| C | -0.23766100 | 3.22562900  | 2.62661900  | C                                            | 6.01604200   | -0.29615900 | 0.34286700  |
| H | -0.94136100 | 1.29445200  | 3.29599600  | C                                            | 5.58733900   | -1.54539700 | 0.82438500  |
| H | 0.37246600  | 1.20639000  | 2.12580700  | C                                            | 6.55292100   | -2.44844500 | 1.29764800  |
| C | -4.60712000 | -1.53073400 | 3.67184100  | C                                            | 7.91337900   | -2.11503900 | 1.29087000  |
| H | -4.54230900 | -1.50066100 | 1.52159300  | C                                            | 8.32925400   | -0.86740200 | 0.80860300  |
| H | -4.42290900 | 0.09341500  | 2.24898300  | H                                            | 7.68714800   | 1.01562800  | -0.03616000 |
| C | -2.62501700 | -3.09284900 | 3.76670600  | H                                            | 5.27973500   | 0.41715500  | -0.02440700 |
| H | -2.38518300 | -3.10591500 | 1.61079800  | H                                            | 6.23748300   | -3.41886900 | 1.67683700  |
| H | -0.98105600 | -2.51280700 | 2.49159400  | H                                            | 8.64665300   | -2.82610800 | 1.66437300  |
| C | -3.72608900 | 0.70590800  | -2.86717100 | H                                            | 9.38447900   | -0.60520500 | 0.80543600  |

|   |             |             |             |                  |             |             |             |
|---|-------------|-------------|-------------|------------------|-------------|-------------|-------------|
| C | 4.12141100  | -1.91783500 | 0.78331700  | H                | -1.94553400 | 0.20173800  | 3.08949400  |
| C | 3.72705900  | -2.58287300 | -0.55443300 | C                | -2.91383800 | 1.20380300  | -1.63675100 |
| H | 3.51484400  | -1.01814400 | 0.92861500  | C                | -3.60226900 | -1.12502700 | -0.93631400 |
| H | 3.88412300  | -2.59124000 | 1.61274700  | H                | -4.05283400 | 0.70370300  | 0.12075100  |
| C | 2.23398500  | -2.52157600 | -0.87243900 | C                | -2.05442500 | 4.24398000  | 1.92975500  |
| H | 4.26206100  | -2.09162600 | -1.37617600 | H                | -2.81535300 | 2.38351300  | 2.71750800  |
| H | 4.04693800  | -3.63124900 | -0.56176900 | H                | -3.38083600 | 2.74880700  | 1.08746000  |
| H | 2.04233900  | -3.04071200 | -1.81665300 | C                | 0.33663100  | 3.47325400  | 2.28072800  |
| O | 1.83786200  | -1.11668900 | -1.04930600 | H                | -0.33508200 | 1.57518000  | 3.06003600  |
| C | 2.22813600  | 5.74081900  | -1.66582100 | H                | 0.70736000  | 1.42767500  | 1.64607500  |
| C | 2.35012300  | 4.39959400  | -1.27981800 | C                | -4.34974400 | -0.70245100 | 3.99705800  |
| C | 1.29275900  | 3.48465200  | -1.45338200 | H                | -4.45268700 | -1.03931800 | 1.86648600  |
| C | 0.10351000  | 3.96745000  | -2.03524600 | H                | -4.28227700 | 0.65182300  | 2.31553300  |
| C | -0.03187800 | 5.30543700  | -2.42401100 | C                | -2.35510700 | -2.23927900 | 4.20509100  |
| C | 1.03339400  | 6.19827800  | -2.23892500 | H                | -2.37524100 | -2.63478300 | 2.08135900  |
| H | 3.05747000  | 6.42997500  | -1.51894000 | H                | -0.85127300 | -1.96611600 | 2.66971600  |
| H | 3.27771900  | 4.05567600  | -0.82700400 | C                | -4.10368500 | 1.24855200  | -2.61045400 |
| H | -0.72395700 | 3.27540100  | -2.17266300 | H                | -2.01239900 | 0.84895500  | -2.14903200 |
| H | -0.96229800 | 5.65530800  | -2.86714500 | H                | -2.69287700 | 2.21850100  | -1.29163500 |
| H | 0.93316500  | 7.23980800  | -2.53687800 | C                | -4.80765900 | -1.07083800 | -1.88601600 |
| B | 1.37836900  | 1.97176400  | -0.97563800 | H                | -2.75114300 | -1.55117400 | -1.47202900 |
| O | 2.58602200  | 1.61177000  | -0.33710600 | H                | -3.80853900 | -1.80017600 | -0.09874000 |
| H | 2.52304300  | 0.66589500  | -0.11906000 | C                | -0.80937600 | 4.33984900  | 2.82515000  |
| O | 0.35609900  | 1.13730500  | -1.15709500 | H                | -2.87635600 | 4.83325500  | 2.35468500  |
| H | 2.10720600  | -0.76462500 | -1.91601300 | H                | -1.82755300 | 4.67562000  | 0.94503500  |
| C | -0.83649200 | -3.15499600 | -1.27143600 | H                | 1.19707600  | 3.50742300  | 2.96041900  |
| C | -1.82238300 | -4.14650200 | -1.08818600 | H                | 0.67498500  | 3.87768600  | 1.31863900  |
| C | -0.56431600 | -2.76078100 | -2.59943800 | C                | -3.87090800 | -2.10285700 | 4.40340900  |
| C | -2.51467000 | -4.70627800 | -2.16680400 | H                | -5.43966600 | -0.62670500 | 4.09310400  |
| H | -2.06674800 | -4.46656000 | -0.07690600 | H                | -3.91872300 | 0.04242400  | 4.68053300  |
| C | -1.25165000 | -3.31582500 | -3.68334200 | H                | -2.02604900 | -3.25677500 | 4.44869400  |
| H | 0.15962700  | -1.97391900 | -2.78857200 | H                | -1.83591400 | -1.56363400 | 4.89937100  |
| C | -2.23494800 | -4.29141000 | -3.47521400 | C                | -4.51517600 | -0.15383100 | -3.08264500 |
| H | -3.27819100 | -5.45987800 | -1.98576700 | H                | -3.84823900 | 1.88139200  | -3.46942000 |
| H | -1.02876800 | -2.97477800 | -4.69200000 | H                | -4.95905500 | 1.72510100  | -2.11066900 |
| H | -2.77754400 | -4.71583600 | -4.31646800 | H                | -5.04725600 | -2.08421200 | -2.23054000 |
| H | 1.58047200  | -2.63317500 | 1.17245200  | H                | -5.68929900 | -0.69912800 | -1.34464400 |
| P | -1.74993700 | 0.17417400  | 0.72123800  | H                | -0.48649400 | 5.38441000  | 2.91377600  |
| C | -1.34996800 | 1.94363200  | 1.16449600  | H                | -1.06957100 | 4.00124900  | 3.83828900  |
| C | -2.40911900 | -0.48455200 | 2.37011600  | H                | -4.14033700 | -2.31053600 | 5.44601200  |
| C | -3.21104400 | 0.27929700  | -0.43786600 | H                | -4.38506900 | -2.85321000 | 3.78639700  |
| C | -2.50417400 | 2.78287400  | 1.74394300  | H                | -5.38937000 | -0.09191000 | -3.74236700 |
| C | -0.10851000 | 2.01521800  | 2.07923300  | H                | -3.69872900 | -0.59073200 | -3.67484500 |
| H | -1.06066800 | 2.37282500  | 0.20327900  |                  |             |             |             |
| C | -3.93883500 | -0.35795800 | 2.55460400  |                  |             |             |             |
| C | -1.93897500 | -1.89594100 | 2.76495400  | <b>dist-TS1'</b> |             |             |             |

|                                                           |             |             |             |   |             |             |             |
|-----------------------------------------------------------|-------------|-------------|-------------|---|-------------|-------------|-------------|
| Sum of electronic and thermal Free Energies= -3288.661992 |             |             |             | C | 0.40565700  | -2.83980700 | -1.34778000 |
| C                                                         | -0.22372000 | 1.55872700  | 1.25032100  | H | 2.02167700  | -1.68971200 | -2.15738400 |
| C                                                         | -1.76261300 | 1.42572600  | 1.14936200  | C | 2.87870000  | -0.10488500 | 2.51501800  |
| Ni                                                        | -0.27935000 | 0.08553500  | 0.07784800  | C | 1.38852500  | -2.14738600 | 2.32438900  |
| C                                                         | -2.51011000 | 0.78614800  | -0.19667300 | H | 3.30314200  | -1.86504600 | 1.36369900  |
| O                                                         | -1.99289300 | -0.39633700 | -0.73605500 | C | 5.24315900  | 1.25700800  | -1.36329900 |
| H                                                         | -2.47910700 | 1.60302700  | -0.94236100 | H | 4.38717300  | -0.70562600 | -1.64177200 |
| C                                                         | -3.97501000 | 0.59792500  | 0.23574700  | H | 4.74398600  | -0.32384400 | 0.04132300  |
| H                                                         | -4.35876500 | 1.51873600  | 0.69513800  | C | 3.24750200  | 2.32194700  | -2.51459100 |
| H                                                         | -4.01596700 | -0.19146500 | 0.99678800  | H | 2.32374600  | 0.38981200  | -2.80973800 |
| C                                                         | -4.87023700 | 0.20476200  | -0.95387500 | H | 1.32672700  | 1.51600800  | -1.88886100 |
| H                                                         | -4.83347000 | 1.00202500  | -1.70655700 | C | 2.92306900  | -4.27454500 | -1.97880800 |
| H                                                         | -4.44809800 | -0.69390100 | -1.41360900 | H | 2.66156500  | -3.68102400 | 0.07714500  |
| C                                                         | -6.30260500 | -0.04181900 | -0.53358800 | H | 3.85733700  | -2.72310200 | -0.78747100 |
| C                                                         | -7.26349400 | 0.98189300  | -0.58925400 | C | 0.45546300  | -3.93232000 | -2.42837700 |
| C                                                         | -6.69523000 | -1.29448400 | -0.02953200 | H | 0.10964200  | -3.28851900 | -0.39039700 |
| C                                                         | -8.57796000 | 0.76347700  | -0.15709600 | H | -0.36394500 | -2.10208400 | -1.59343200 |
| H                                                         | -6.98001300 | 1.95877700  | -0.97729400 | C | 3.43943700  | -0.64554400 | 3.84127400  |
| C                                                         | -8.00680700 | -1.51960800 | 0.40462500  | H | 2.02709300  | 0.54771400  | 2.73129200  |
| H                                                         | -5.96519900 | -2.10063300 | 0.02008900  | H | 3.63550100  | 0.51168300  | 2.01971500  |
| C                                                         | -8.95526700 | -0.48958000 | 0.34270600  | C | 1.94076300  | -2.67780900 | 3.65697300  |
| H                                                         | -9.30700200 | 1.56877600  | -0.21305300 | H | 0.48167400  | -1.55376200 | 2.50555000  |
| H                                                         | -8.29030300 | -2.49757300 | 0.78723200  | H | 1.08756600  | -2.98674600 | 1.68871800  |
| H                                                         | -9.97558700 | -0.66264100 | 0.67646200  | C | 4.71143300  | 1.87937500  | -2.66405700 |
| H                                                         | -2.11260300 | 0.83681700  | 2.00200400  | H | 6.27135900  | 0.90167100  | -1.50253600 |
| H                                                         | -2.20926100 | 2.42331200  | 1.20679500  | H | 5.27508900  | 2.02487400  | -0.57784800 |
| H                                                         | 0.13063000  | 1.30473100  | 2.25140900  | H | 2.86753300  | 2.71083300  | -3.46724800 |
| C                                                         | 0.42713700  | 2.78604500  | 0.72775100  | H | 3.18229800  | 3.14278700  | -1.78981100 |
| C                                                         | 1.56707800  | 3.31681100  | 1.36677900  | C | 1.56042700  | -4.96166300 | -2.14959900 |
| C                                                         | -0.04390000 | 3.44851900  | -0.42661000 | H | 3.69574200  | -5.01265400 | -1.73155100 |
| C                                                         | 2.21237300  | 4.45459500  | 0.87419100  | H | 3.22013200  | -3.80999200 | -2.92936300 |
| H                                                         | 1.95156000  | 2.83169700  | 2.26065900  | H | -0.52060700 | -4.42797000 | -2.49576600 |
| C                                                         | 0.59703000  | 4.58725500  | -0.91917100 | H | 0.63851600  | -3.46062300 | -3.40417100 |
| H                                                         | -0.91376900 | 3.05920600  | -0.94745500 | C | 2.41575800  | -1.53346600 | 4.56408700  |
| C                                                         | 1.73078000  | 5.09835700  | -0.27279100 | H | 3.73748800  | 0.19356500  | 4.48132000  |
| H                                                         | 3.09128200  | 4.83942900  | 1.38628400  | H | 4.34839400  | -1.22852900 | 3.63785100  |
| H                                                         | 0.21688200  | 5.07374000  | -1.81450400 | H | 1.17159300  | -3.27346200 | 4.16298800  |
| H                                                         | 2.23295300  | 5.98135600  | -0.65991100 | H | 2.78284500  | -3.35386600 | 3.45332000  |
| P                                                         | 1.70753100  | -0.67454700 | -0.02068600 | H | 5.33675800  | 2.73082400  | -2.95904000 |
| C                                                         | 2.89675000  | 0.57095500  | -0.71708200 | H | 4.78468300  | 1.13758100  | -3.47198600 |
| C                                                         | 1.78021000  | -2.15053800 | -1.19032000 | H | 1.60619400  | -5.70097700 | -2.95844500 |
| C                                                         | 2.42157900  | -1.25740900 | 1.59911900  | H | 1.31772700  | -5.51193800 | -1.22954100 |
| C                                                         | 4.35141300  | 0.09464200  | -0.89205300 | H | 2.84664200  | -1.93490600 | 5.48913000  |
| C                                                         | 2.35422600  | 1.16677400  | -2.03429600 | H | 1.55063400  | -0.92142600 | 4.85561900  |
| H                                                         | 2.88264800  | 1.37783200  | 0.02595800  |   |             |             |             |
| C                                                         | 2.87502900  | -3.19522300 | -0.88289600 |   |             |             |             |



|                                              |              |             |             |   |             |             |             |
|----------------------------------------------|--------------|-------------|-------------|---|-------------|-------------|-------------|
| <b>dist-2'</b>                               |              |             |             | C | 3.72445200  | -1.99519400 | 1.75829700  |
| Sum of electronic and thermal Free Energies= | -3288.687987 |             |             | C | 1.55295500  | -1.08865500 | 2.73321800  |
| C                                            | -0.32525100  | 1.52623600  | 0.98693600  | H | 1.73840700  | -2.69088500 | 1.33280400  |
| C                                            | -1.78962900  | 1.40261600  | 1.46552100  | C | 2.97923600  | 1.09231900  | -1.77261700 |
| Ni                                           | -0.22784700  | 0.04704200  | -0.23902400 | C | 3.40284300  | 1.43426500  | 0.70773200  |
| C                                            | -2.68476400  | 1.20992200  | 0.23934000  | H | 4.14957300  | -0.20038500 | -0.48628400 |
| O                                            | -1.97738800  | 0.38511400  | -0.67351300 | C | 3.09116300  | -3.53514100 | -3.06192700 |
| H                                            | -2.86543500  | 2.19908800  | -0.22299700 | H | 3.53210500  | -3.27679600 | -0.96469700 |
| C                                            | -4.04739400  | 0.60357300  | 0.59039800  | H | 3.97014000  | -1.88906400 | -1.95842500 |
| H                                            | -4.54835000  | 1.22959800  | 1.34195800  | C | 0.65448100  | -3.98914100 | -2.53037000 |
| H                                            | -3.88242900  | -0.38179100 | 1.04660100  | H | 1.02413300  | -3.73753300 | -0.41870500 |
| C                                            | -4.96178600  | 0.44788000  | -0.63916900 | H | -0.21264500 | -2.65943700 | -1.05183800 |
| H                                            | -5.14506100  | 1.43861000  | -1.07353400 | C | 3.90901200  | -2.87182300 | 3.00968200  |
| H                                            | -4.42318000  | -0.13855600 | -1.39091300 | H | 4.25601600  | -1.04932000 | 1.91059200  |
| C                                            | -6.27746300  | -0.21742400 | -0.30024100 | H | 4.18975700  | -2.47924500 | 0.89520800  |
| C                                            | -7.40397800  | 0.54241200  | 0.05867800  | C | 1.75406300  | -1.96147600 | 3.98224000  |
| C                                            | -6.39063500  | -1.61886500 | -0.28565400 | H | 1.97462500  | -0.09264300 | 2.91826300  |
| C                                            | -8.60785600  | -0.07567000 | 0.41998900  | H | 0.48491000  | -0.94560100 | 2.53427400  |
| H                                            | -7.33773000  | 1.62910600  | 0.05279400  | C | 4.07604500  | 2.12043500  | -2.09385000 |
| C                                            | -7.59061500  | -2.24353900 | 0.07481500  | H | 2.00476000  | 1.59729600  | -1.73345300 |
| H                                            | -5.52940100  | -2.22510700 | -0.56156300 | H | 2.92542600  | 0.35598900  | -2.58171700 |
| C                                            | -8.70613400  | -1.47316500 | 0.43018000  | C | 4.50331000  | 2.45379400  | 0.37266500  |
| H                                            | -9.46853300  | 0.53203000  | 0.69042000  | H | 2.46170600  | 1.96949200  | 0.84714200  |
| H                                            | -7.65705300  | -3.32927100 | 0.07560300  | H | 3.63470700  | 0.94482100  | 1.65796000  |
| H                                            | -9.64022200  | -1.95561300 | 0.70793700  | C | 2.00875300  | -4.61279100 | -2.89959100 |
| H                                            | -1.86381700  | 0.50794800  | 2.09804400  | H | 4.06240300  | -3.99839100 | -3.27370600 |
| H                                            | -2.08857200  | 2.26755200  | 2.08010300  | H | 2.84744400  | -2.89975400 | -3.92469800 |
| H                                            | 0.35042800   | 1.38006700  | 1.83653700  | H | -0.09380000 | -4.77301700 | -2.36289400 |
| C                                            | 0.01250400   | 2.83414100  | 0.31733100  | H | 0.29290300  | -3.37838600 | -3.36899200 |
| C                                            | 0.71032100   | 3.82054300  | 1.04280300  | C | 3.24205900  | -2.24184600 | 4.24164700  |
| C                                            | -0.34526000  | 3.13677800  | -1.01255200 | H | 4.97882300  | -3.02922600 | 3.19288200  |
| C                                            | 1.04787100   | 5.05143300  | 0.46857700  | H | 3.46954600  | -3.86187800 | 2.82448600  |
| H                                            | 1.00320100   | 3.61638900  | 2.07123800  | H | 1.29950300  | -1.47202200 | 4.85211100  |
| C                                            | -0.00934800  | 4.36403400  | -1.59169500 | H | 1.22523000  | -2.91467900 | 3.84212300  |
| H                                            | -0.87034000  | 2.38285100  | -1.59236800 | C | 4.22988400  | 3.15126100  | -0.96738600 |
| C                                            | 0.69243200   | 5.32929100  | -0.85653600 | H | 3.84026100  | 2.62010000  | -3.04134900 |
| H                                            | 1.59729700   | 5.78673700  | 1.05232100  | H | 5.03066100  | 1.59565700  | -2.24043500 |
| H                                            | -0.28712200  | 4.56469200  | -2.62433500 | H | 4.57123100  | 3.19230300  | 1.18087800  |
| H                                            | 0.96420500   | 6.27871500  | -1.31172600 | H | 5.47471300  | 1.94135600  | 0.32706200  |
| P                                            | 1.81586200   | -0.76723600 | -0.05918900 | H | 1.91688100  | -5.20107800 | -3.82048700 |
| C                                            | 1.84305900   | -2.01224100 | -1.46441900 | H | 2.31206100  | -5.31059300 | -2.10640600 |
| C                                            | 2.22799800   | -1.72169300 | 1.49623100  | H | 3.35917200  | -2.89682800 | 5.11342900  |
| C                                            | 3.22874100   | 0.39253900  | -0.41740300 | H | 3.75061900  | -1.29775200 | 4.48319600  |
| C                                            | 3.20226100   | -2.65414800 | -1.80486400 | H | 5.03819400  | 3.85448600  | -1.20297000 |
| C                                            | 0.76459200   | -3.10456900 | -1.27669500 | H | 3.30601500  | 3.73900100  | -0.88526100 |
| H                                            | 1.52998800   | -1.40512000 | -2.32547800 |   |             |             |             |

**H-TS1**

Sum of electronic and thermal Free Energies= -3288.666206

|    |             |             |             |   |             |             |             |
|----|-------------|-------------|-------------|---|-------------|-------------|-------------|
|    |             |             |             | C | 0.50172900  | 2.66684600  | 2.25157100  |
|    |             |             |             | H | 1.31803000  | 0.72952800  | 1.71928600  |
|    |             |             |             | H | 0.70268300  | 1.65903600  | 0.35121600  |
| Ni | -0.55845500 | 0.06592000  | -1.85795800 | C | 0.08342900  | 2.39394500  | 3.70346800  |
| C  | 1.08042000  | -0.81956200 | -2.20845800 | H | -1.54378600 | 1.44962800  | 4.79843800  |
| O  | 1.22885700  | -1.92822500 | -2.72990900 | H | -2.05343300 | 2.31420100  | 3.34723300  |
| C  | -1.98813900 | 2.62776600  | -1.25400200 | H | 1.49552100  | 3.13060400  | 2.21906500  |
| C  | -0.80465600 | 3.39094000  | -1.36286200 | H | -0.19665600 | 3.38360800  | 1.80539400  |
| C  | -0.65701200 | 4.59451700  | -0.67132600 | H | 0.03350700  | 3.33564000  | 4.26382900  |
| C  | -1.68135900 | 5.06703400  | 0.16153700  | H | 0.84498200  | 1.77200600  | 4.19525700  |
| C  | -2.85188400 | 4.31048900  | 0.29850200  | C | 0.37364800  | -2.02949300 | 0.68509000  |
| C  | -3.00193600 | 3.10828200  | -0.40001100 | C | 0.63896300  | -2.30449600 | 2.17782700  |
| H  | 0.01218400  | 3.02301400  | -1.97970100 | C | 0.11729400  | -3.35764400 | -0.06176300 |
| H  | 0.26741500  | 5.15938000  | -0.76798700 | H | 1.29594600  | -1.60188200 | 0.27554000  |
| H  | -1.56154000 | 6.00048100  | 0.70556100  | C | 1.78695900  | -3.31466600 | 2.36597200  |
| H  | -3.65154200 | 4.65748300  | 0.94902400  | H | -0.27212200 | -2.68292300 | 2.66000000  |
| H  | -3.92199400 | 2.53848200  | -0.28979400 | H | 0.91701700  | -1.38211800 | 2.68926100  |
| C  | 2.31257200  | -0.03591300 | -1.73480900 | C | 1.28182300  | -4.34317300 | 0.12086800  |
| H  | 2.49524700  | 0.74338100  | -2.48721000 | H | -0.79557900 | -3.82174200 | 0.33298400  |
| H  | 2.05012800  | 0.50184900  | -0.81976300 | H | -0.03618700 | -3.17010000 | -1.12584700 |
| C  | 3.57776300  | -0.88746600 | -1.51226900 | C | 1.54559600  | -4.62420400 | 1.60548000  |
| H  | 3.30492400  | -1.77906400 | -0.93764100 | H | 1.92600400  | -3.50999900 | 3.43631100  |
| H  | 3.95491800  | -1.24199200 | -2.47576000 | H | 2.71988900  | -2.85752100 | 2.00604000  |
| C  | 4.63933000  | -0.10451700 | -0.77319500 | H | 1.05890900  | -5.27488700 | -0.41338300 |
| C  | 5.67214600  | 0.55647200  | -1.45742200 | H | 2.18520200  | -3.92216700 | -0.34089200 |
| C  | 4.57755500  | 0.02396600  | 0.62636200  | H | 2.40370900  | -5.29696900 | 1.72432300  |
| C  | 6.61832600  | 1.32431700  | -0.76585000 | H | 0.67512200  | -5.13922100 | 2.03598100  |
| H  | 5.73676900  | 0.46905500  | -2.54051000 | C | -2.59008000 | -1.55146900 | 0.38597100  |
| C  | 5.51908700  | 0.78921400  | 1.32256900  | C | -3.73718000 | -0.58021200 | 0.75011600  |
| H  | 3.78441800  | -0.48194100 | 1.17470300  | C | -2.96072900 | -2.28299600 | -0.92867000 |
| C  | 6.54507400  | 1.44467900  | 0.62765700  | H | -2.50107200 | -2.29212600 | 1.19290700  |
| H  | 7.41251100  | 1.82605000  | -1.31400200 | C | -5.07619700 | -1.32489300 | 0.88772400  |
| H  | 5.45508900  | 0.87267000  | 2.40511900  | H | -3.83486400 | 0.17674900  | -0.03346600 |
| H  | 7.27942300  | 2.03877400  | 1.16618200  | H | -3.53275100 | -0.04003100 | 1.67506400  |
| C  | -1.57352300 | 1.15278800  | -3.27029500 | C | -4.30045100 | -3.02689800 | -0.80894000 |
| H  | -2.04771800 | 0.45432800  | -3.95802800 | H | -3.02142600 | -1.53807600 | -1.73321500 |
| H  | -1.04286100 | 1.96342500  | -3.76423400 | H | -2.18191600 | -2.98547200 | -1.22683100 |
| H  | -0.04208300 | 0.30200500  | -3.22630500 | C | -5.43729300 | -2.08239600 | -0.39702300 |
| P  | -0.90792700 | -0.72581700 | 0.21146100  | H | -5.86576300 | -0.60810300 | 1.14435500  |
| C  | -0.84677300 | 0.64693500  | 1.48325800  | H | -5.00855800 | -2.03479900 | 1.72391200  |
| C  | -1.21020000 | 0.35294900  | 2.95732500  | H | -4.53443400 | -3.51489700 | -1.76294800 |
| C  | 0.50370900  | 1.39062300  | 1.39348600  | H | -4.20116400 | -3.82592600 | -0.06081200 |
| H  | -1.60643500 | 1.33662400  | 1.09505300  | H | -6.37088000 | -2.64187400 | -0.26175500 |
| C  | -1.26790600 | 1.66495400  | 3.75883900  | H | -5.61436500 | -1.35761000 | -1.20420000 |
| H  | -0.46003900 | -0.29003400 | 3.41948200  | C | -2.18051400 | 1.37402600  | -2.01073700 |
| H  | -2.16006100 | -0.18142200 | 3.03722000  | H | -3.10307600 | 0.83774600  | -1.81022100 |

**H-2**

Sum of electronic and thermal Free Energies= -3288.676182

|    |             |             |             |   |             |             |             |
|----|-------------|-------------|-------------|---|-------------|-------------|-------------|
|    |             |             |             | H | -2.31090900 | -0.30126700 | 2.98957100  |
|    |             |             |             | C | 0.29743600  | 2.63996800  | 2.38309000  |
|    |             |             |             | H | 1.19848300  | 0.73305400  | 1.87343600  |
|    |             |             |             | H | 0.63385400  | 1.66380400  | 0.48343300  |
| Ni | -0.55124000 | 0.12307700  | -1.73637700 | C | -0.18646600 | 2.33194800  | 3.80762100  |
| C  | 1.13377400  | -0.69213000 | -2.11439700 | H | -1.83298800 | 1.31669100  | 4.80605200  |
| O  | 1.31174500  | -1.71417000 | -2.79089200 | H | -2.29937000 | 2.18858300  | 3.34468200  |
| C  | -2.02898700 | 2.59370200  | -1.24774900 | H | 1.27597000  | 3.13541500  | 2.40981400  |
| C  | -0.87905300 | 3.41892000  | -1.29290500 | H | -0.39924500 | 3.34035400  | 1.90891300  |
| C  | -0.80739100 | 4.60753700  | -0.56374000 | H | -0.29675200 | 3.26307000  | 4.37689900  |
| C  | -1.87737900 | 5.01357600  | 0.24632500  | H | 0.56931100  | 1.72830800  | 4.33016700  |
| C  | -3.01859100 | 4.20286600  | 0.31699100  | C | 0.39434000  | -2.02112700 | 0.71063300  |
| C  | -3.09310900 | 3.01691800  | -0.41853700 | C | 0.57485400  | -2.35309200 | 2.20487200  |
| H  | -0.02554800 | 3.11267200  | -1.89460900 | C | 0.23978100  | -3.32233400 | -0.10793200 |
| H  | 0.09348600  | 5.21525000  | -0.61651400 | H | 1.32088300  | -1.53712500 | 0.37975400  |
| H  | -1.81825200 | 5.93637000  | 0.81787100  | C | 1.74973500  | -3.32590000 | 2.42244100  |
| H  | -3.85693200 | 4.49844200  | 0.94440700  | H | -0.34869400 | -2.78844200 | 2.60892300  |
| H  | -3.99297100 | 2.40851300  | -0.35742900 | H | 0.78030500  | -1.44509400 | 2.77301800  |
| C  | 2.36323800  | 0.06418900  | -1.58380200 | C | 1.43283200  | -4.26686200 | 0.10470500  |
| H  | 2.48187800  | 0.95156200  | -2.22257700 | H | -0.67317200 | -3.84097100 | 0.21121400  |
| H  | 2.12424700  | 0.45671600  | -0.59096800 | H | 0.13912000  | -3.09271900 | -1.17046400 |
| C  | 3.66759700  | -0.75440900 | -1.53878100 | C | 1.61354900  | -4.60636200 | 1.58970000  |
| H  | 3.46041400  | -1.70778900 | -1.03982600 | H | 1.82799000  | -3.56643400 | 3.48966800  |
| H  | 3.98151900  | -0.99711000 | -2.55797400 | H | 2.68349700  | -2.81571100 | 2.14560600  |
| C  | 4.75891400  | -0.01293300 | -0.80146800 | H | 1.28500100  | -5.18046300 | -0.48388100 |
| C  | 5.72150200  | 0.74517700  | -1.48820000 | H | 2.34527300  | -3.78868500 | -0.27722900 |
| C  | 4.79890200  | -0.02390900 | 0.60484000  | H | 2.49051900  | -5.24895800 | 1.73442300  |
| C  | 6.69746800  | 1.47137000  | -0.79329700 | H | 0.74047100  | -5.17579800 | 1.93845800  |
| H  | 5.70750800  | 0.76621400  | -2.57646700 | C | -2.57188200 | -1.62891900 | 0.29051200  |
| C  | 5.77093500  | 0.69921400  | 1.30453500  | C | -3.75882900 | -0.68920600 | 0.60369500  |
| H  | 4.06121100  | -0.60584500 | 1.15535600  | C | -2.85289500 | -2.34573200 | -1.05407800 |
| C  | 6.72592800  | 1.45198100  | 0.60698900  | H | -2.50217000 | -2.38013000 | 1.08985600  |
| H  | 7.43598300  | 2.04928900  | -1.34430100 | C | -5.08655200 | -1.46425700 | 0.65518800  |
| H  | 5.78634600  | 0.67398600  | 2.39181900  | H | -3.82317700 | 0.07500700  | -0.17587600 |
| H  | 7.48387600  | 2.01311500  | 1.14817800  | H | -3.61912400 | -0.15951600 | 1.54668700  |
| C  | -1.42314300 | 1.23730400  | -3.33390700 | C | -4.17917400 | -3.12201500 | -1.01911400 |
| H  | -1.97508300 | 0.64492800  | -4.06571300 | H | -2.88893300 | -1.58496500 | -1.84509700 |
| H  | -1.11439500 | 2.19176200  | -3.76808100 | H | -2.04308800 | -3.02494600 | -1.32188900 |
| H  | -0.37755000 | 0.69608900  | -3.30871900 | C | -5.35872500 | -2.20969800 | -0.65808800 |
| P  | -0.91208000 | -0.75140100 | 0.22535200  | H | -5.90456000 | -0.76785500 | 0.87652800  |
| C  | -0.94728200 | 0.59679500  | 1.51902900  | H | -5.05116500 | -2.18501600 | 1.48409500  |
| C  | -1.37502300 | 0.26283500  | 2.96680500  | H | -4.34803400 | -3.59980800 | -1.99184600 |
| C  | 0.38575900  | 1.37682400  | 1.51040600  | H | -4.10301000 | -3.93053600 | -0.27850300 |
| H  | -1.70518300 | 1.27203200  | 1.10282600  | H | -6.28523800 | -2.79180200 | -0.58295800 |
| C  | -1.51396100 | 1.55836400  | 3.78479000  | H | -5.50714100 | -1.47678500 | -1.46364200 |
| H  | -0.62830100 | -0.36582700 | 3.45451400  | C | -2.11092200 | 1.33177300  | -2.00471500 |

|                                              |              |             |             |   |             |             |             |
|----------------------------------------------|--------------|-------------|-------------|---|-------------|-------------|-------------|
| H                                            | -3.09728500  | 0.87234400  | -1.99093700 | C | -3.72288600 | 0.82121500  | 2.89680000  |
|                                              |              |             |             | H | -2.20640900 | 1.42446500  | 1.47257600  |
|                                              |              |             |             | H | -3.60589700 | 0.65562900  | 0.74125600  |
| <b>prox-1</b>                                |              |             |             | C | -2.03306000 | -0.58245500 | 4.14964500  |
| Sum of electronic and thermal Free Energies= | -3288.699761 |             |             | H | -0.45969400 | -0.01765400 | 2.76521000  |
| Ni                                           | 0.06712000   | 0.88844100  | -0.40061400 | H | -0.71349200 | -1.75213300 | 2.90125100  |
| H                                            | 1.52255600   | 2.78304800  | 0.63352600  | C | -2.81119400 | 0.74126000  | 4.12961200  |
| P                                            | -1.24902200  | -0.90188900 | -0.01164500 | H | -4.23259500 | 1.79190700  | 2.85875300  |
| C                                            | -2.64376900  | -1.14846800 | -1.25406100 | H | -4.50611100 | 0.05370600  | 2.97241600  |
| C                                            | -3.92160000  | -1.88923200 | -0.80441200 | H | -1.35322900 | -0.61153500 | 5.01024000  |
| C                                            | -2.12501500  | -1.75779200 | -2.57437000 | H | -2.73965800 | -1.41522400 | 4.27651700  |
| H                                            | -2.94203900  | -0.11470500 | -1.47446300 | H | -3.40045300 | 0.85284100  | 5.04813600  |
| C                                            | -4.99864000  | -1.82398400 | -1.90352200 | H | -2.09868100 | 1.57776900  | 4.10433400  |
| H                                            | -3.69203200  | -2.93876400 | -0.58753700 | C | 0.11661900  | 2.44312700  | -1.71087000 |
| H                                            | -4.32744600  | -1.45830800 | 0.11507700  | C | -0.43345400 | 1.28038900  | -2.28418900 |
| C                                            | -3.19343600  | -1.67879200 | -3.67703200 | H | -1.50237600 | 1.19553500  | -2.46540400 |
| H                                            | -1.87121700  | -2.81301200 | -2.41027200 | H | 0.18360600  | 0.70241500  | -2.97223200 |
| H                                            | -1.20668500  | -1.25879200 | -2.89893200 | C | 7.50162100  | 0.61864200  | -0.74217000 |
| C                                            | -4.48943300  | -2.37951000 | -3.24162600 | C | 7.54887100  | -0.76188300 | -0.97365200 |
| H                                            | -5.89006200  | -2.37366500 | -1.57739500 | C | 6.46538500  | -1.56303500 | -0.58709700 |
| H                                            | -5.30498000  | -0.77707200 | -2.03852000 | C | 5.34747900  | -0.98468000 | 0.02391700  |
| H                                            | -2.80789600  | -2.12901400 | -4.59985500 | C | 5.28810100  | 0.40002000  | 0.26304400  |
| H                                            | -3.40368800  | -0.62386400 | -3.90187400 | C | 6.37925100  | 1.19184800  | -0.12988200 |
| H                                            | -5.25973300  | -2.27234500 | -4.01498100 | H | 8.33848800  | 1.24836100  | -1.03551100 |
| H                                            | -4.29566600  | -3.45611800 | -3.13410700 | H | 8.41995200  | -1.20902700 | -1.44646400 |
| C                                            | -0.29635000  | -2.51457000 | 0.00853300  | H | 6.49364900  | -2.63666000 | -0.75895300 |
| C                                            | -1.02231300  | -3.72549500 | 0.62889400  | H | 4.51030100  | -1.61377200 | 0.32182400  |
| C                                            | 1.11671700   | -2.33561300 | 0.60704200  | H | 6.35134400  | 2.26564000  | 0.04656100  |
| H                                            | -0.15002900  | -2.72660000 | -1.05875200 | C | 4.04965700  | 1.01339800  | 0.87697800  |
| C                                            | -0.17676000  | -5.00545900 | 0.49994600  | H | 4.29569300  | 1.96123600  | 1.36933900  |
| H                                            | -1.22432400  | -3.53526600 | 1.68978600  | H | 3.64113300  | 0.34504200  | 1.64250500  |
| H                                            | -1.99226200  | -3.88015000 | 0.14753200  | C | 2.94283600  | 1.25533400  | -0.17849800 |
| C                                            | 1.94350800   | -3.62317600 | 0.46915700  | H | 2.77218800  | 0.32085900  | -0.72529600 |
| H                                            | 1.04826600   | -2.06105200 | 1.66437800  | H | 3.27292500  | 2.00465700  | -0.90697500 |
| H                                            | 1.61815800   | -1.49936700 | 0.11228100  | C | 1.64226400  | 1.70022000  | 0.47050400  |
| C                                            | 1.22413400   | -4.82366400 | 1.10248900  | O | 1.02723700  | 0.89115900  | 1.28848200  |
| H                                            | -0.69678500  | -5.84095000 | 0.98451200  | H | 1.13403700  | 2.71803100  | -1.98186600 |
| H                                            | -0.08140400  | -5.26558100 | -0.56369300 | C | -0.67394800 | 3.52657000  | -1.08718100 |
| H                                            | 2.92831100   | -3.48196900 | 0.93221000  | C | -0.05128700 | 4.75136100  | -0.77103000 |
| H                                            | 2.12130500   | -3.82805100 | -0.59618900 | C | -2.03632600 | 3.37320600  | -0.74796700 |
| H                                            | 1.81575500   | -5.73772800 | 0.96972600  | C | -0.75808000 | 5.78378400  | -0.14596000 |
| H                                            | 1.13283600   | -4.65860900 | 2.18546300  | H | 0.99933700  | 4.89186900  | -1.01810300 |
| C                                            | -2.15057200  | -0.73038400 | 1.61763500  | C | -2.74293400 | 4.40263500  | -0.12371600 |
| C                                            | -2.92717800  | 0.60621100  | 1.60026400  | H | -2.53844400 | 2.43277800  | -0.95369800 |
| C                                            | -1.22970000  | -0.78899300 | 2.85366700  | C | -2.10967400 | 5.61632100  | 0.18200300  |
| H                                            | -2.86771000  | -1.55738300 | 1.69227500  | H | -0.25368100 | 6.71911100  | 0.08577800  |

|                                              |              |             |             |   |             |             |             |
|----------------------------------------------|--------------|-------------|-------------|---|-------------|-------------|-------------|
| H                                            | -3.78954200  | 4.25583000  | 0.13370600  | C | -3.81145100 | -0.23584000 | -2.73470800 |
| H                                            | -2.66054800  | 6.41621600  | 0.67053200  | H | -3.56970500 | -0.95190600 | -0.71876700 |
|                                              |              |             |             | H | -2.53715200 | 0.41233400  | -1.09889100 |
|                                              |              |             |             | C | -2.57523400 | -4.39423700 | 2.12355900  |
| <b>prox-TS1</b>                              |              |             |             | H | -0.68601200 | -4.38583700 | 1.07744700  |
| Sum of electronic and thermal Free Energies= | -3851.937369 |             |             | H | -2.08048400 | -4.25991300 | 0.01654100  |
| C                                            | 0.25921300   | 1.20242400  | -1.47464500 | C | -1.86422200 | -2.39508900 | 3.51221200  |
| C                                            | 0.86844200   | 2.25197000  | -0.54613500 | H | 0.04834400  | -2.31837400 | 2.50486800  |
| Ni                                           | 0.35060800   | 0.20284600  | 0.08202700  | H | -0.86821800 | -0.83016800 | 2.38282600  |
| C                                            | 1.84250500   | 1.68483200  | 0.81963700  | C | 2.49853700  | -3.33338200 | -2.72755400 |
| H                                            | 1.96209900   | 2.66861400  | 1.29411200  | H | 1.79201900  | -1.37156900 | -2.14573700 |
| C                                            | 3.19831200   | 1.13902000  | 0.34890400  | H | 0.63181300  | -2.29964600 | -3.09181500 |
| H                                            | 3.70779300   | 1.86665700  | -0.28706000 | C | 2.90522600  | -3.96551900 | -0.31591300 |
| H                                            | 3.03521300   | 0.24185700  | -0.26168100 | H | 2.21353700  | -2.02580300 | 0.36024200  |
| C                                            | 4.11251700   | 0.77301300  | 1.53370300  | H | 1.33424700  | -3.37900400 | 1.05255200  |
| H                                            | 4.35073500   | 1.68369800  | 2.09697000  | C | -4.36086500 | -1.53759400 | -3.33752700 |
| H                                            | 3.56038600   | 0.10934700  | 2.20466900  | H | -3.64498400 | -3.47293400 | -4.03189900 |
| C                                            | 5.38117000   | 0.10245500  | 1.05526200  | H | -2.59742300 | -2.11907200 | -4.45238400 |
| C                                            | 6.51442000   | 0.85335200  | 0.70055200  | H | -4.63074800 | 0.43288500  | -2.45264300 |
| C                                            | 5.42799200   | -1.29194800 | 0.88844900  | H | -3.20954000 | 0.29142500  | -3.48836800 |
| C                                            | 7.66176200   | 0.23002800  | 0.19415500  | C | -2.05018400 | -3.91990600 | 3.48723200  |
| H                                            | 6.49707900   | 1.93515600  | 0.82136500  | H | -2.65006700 | -5.48826000 | 2.10293400  |
| C                                            | 6.56951700   | -1.92137700 | 0.37980200  | H | -3.59033900 | -4.00337100 | 1.96777700  |
| H                                            | 4.56035400   | -1.88899100 | 1.16008400  | H | -1.43704900 | -2.07810400 | 4.47147700  |
| C                                            | 7.69310300   | -1.16130800 | 0.02955800  | H | -2.84261300 | -1.90396200 | 3.42208100  |
| H                                            | 8.53026300   | 0.82847200  | -0.07156900 | C | 3.55448600  | -3.49969200 | -1.62596900 |
| H                                            | 6.58147500   | -3.00197400 | 0.25659000  | H | 2.96106800  | -2.95760300 | -3.64811100 |
| H                                            | 8.58280200   | -1.64678300 | -0.36423700 | H | 2.06450300  | -4.31402600 | -2.96747400 |
| H                                            | 0.05329000   | 2.77103800  | -0.03296100 | H | 3.65698000  | -4.04528300 | 0.47851800  |
| H                                            | 0.88724700   | 0.87210000  | -2.30476000 | H | 2.48600200  | -4.97193000 | -0.45350400 |
| P                                            | -0.59265500  | -1.62463600 | -0.43741600 | H | -4.94125200 | -1.32330800 | -4.24314300 |
| C                                            | -1.79376200  | -1.49105900 | -1.85120700 | H | -5.05369100 | -1.99855500 | -2.61921600 |
| C                                            | -1.52492200  | -2.38140600 | 0.99984900  | H | -2.73329300 | -4.23396000 | 4.28574600  |
| C                                            | 0.71738200   | -2.83803800 | -0.97452700 | H | -1.08377700 | -4.40369200 | 3.68776100  |
| C                                            | -2.35932400  | -2.80859200 | -2.41565900 | H | 4.32756200  | -4.21038300 | -1.94189400 |
| C                                            | -2.93869700  | -0.52033000 | -1.50402600 | H | 4.05781000  | -2.53857200 | -1.45584500 |
| H                                            | -1.19119900  | -1.01415200 | -2.63517700 | O | 1.22526900  | 0.79866400  | 1.71582400  |
| C                                            | -1.67217400  | -3.91791400 | 0.97135300  | B | -3.41821300 | 1.76839300  | 1.17673100  |
| C                                            | -0.96324600  | -1.91843200 | 2.36278800  | C | -4.71495900 | 1.76840000  | 0.29053400  |
| H                                            | -2.52551500  | -1.94016600 | 0.90644100  | C | -4.95520900 | 2.79056200  | -0.64813300 |
| C                                            | 1.37602500   | -2.37699700 | -2.29249100 | C | -5.66160900 | 0.72988400  | 0.39036600  |
| C                                            | 1.78624500   | -3.00977900 | 0.12764600  | C | -6.09632100 | 2.77912300  | -1.45894400 |
| H                                            | 0.22828600   | -3.80568600 | -1.14369900 | H | -4.23419300 | 3.59868200  | -0.74791700 |
| C                                            | -3.23085200  | -2.53028400 | -3.65410300 | C | -6.80348800 | 0.70741700  | -0.41757900 |
| H                                            | -2.97713000  | -3.29895700 | -1.65411800 | H | -5.49126700 | -0.07486000 | 1.10173000  |
| H                                            | -1.55493100  | -3.50534700 | -2.67561500 | C | -7.02370400 | 1.73497700  | -1.34519400 |

|                                              |              |             |             |   |             |             |             |
|----------------------------------------------|--------------|-------------|-------------|---|-------------|-------------|-------------|
| H                                            | -6.26141900  | 3.57562000  | -2.18108000 | C | -7.16038800 | -1.55614900 | -0.60622700 |
| H                                            | -7.51825800  | -0.10791800 | -0.33065500 | H | -6.56890400 | 0.51686300  | -0.66128900 |
| H                                            | -7.90832800  | 1.71904700  | -1.97776700 | C | -5.55278300 | -3.13712300 | -1.48173100 |
| O                                            | -2.50250900  | 2.78629200  | 1.02134000  | H | -3.70693200 | -2.29487500 | -2.21107300 |
| H                                            | -1.75935900  | 2.65749900  | 1.65892200  | C | -6.79906800 | -2.87882100 | -0.89990400 |
| O                                            | -3.23477700  | 0.74726300  | 2.08331600  | H | -8.12806500 | -1.34397900 | -0.15707400 |
| H                                            | -2.38233400  | 0.87362900  | 2.55912300  | H | -5.25980200 | -4.15936000 | -1.70971000 |
| C                                            | -0.51327900  | 2.32782100  | 4.21515200  | H | -7.48138100 | -3.69591600 | -0.67813200 |
| C                                            | -1.80126000  | 2.85336400  | 4.83289700  | H | -0.80230900 | 3.14489400  | 0.10123900  |
| H                                            | 0.22560900   | 3.13533400  | 4.12061700  | H | -1.18778400 | 0.54012000  | 1.65712300  |
| H                                            | -0.07596900  | 1.54342600  | 4.84752900  | P | 0.93122400  | -1.39166800 | 0.47231400  |
| H                                            | -1.60545400  | 3.27719600  | 5.82345700  | C | 1.76193700  | -0.96133300 | 2.07723500  |
| H                                            | -2.23970200  | 3.63422300  | 4.20239300  | C | 2.23332900  | -2.17668100 | -0.62927100 |
| H                                            | -2.53389800  | 2.04642100  | 4.94041200  | C | -0.30074600 | -2.73792600 | 0.88569600  |
| O                                            | -0.80661500  | 1.78810000  | 2.91647900  | C | 2.39553800  | -2.13604500 | 2.84787300  |
| H                                            | 0.04375700   | 1.41273100  | 2.48163200  | C | 2.78853800  | 0.17180700  | 1.88735600  |
| H                                            | -0.74358100  | 1.45705800  | -1.82413900 | H | 0.94101200  | -0.55709200 | 2.68401400  |
| C                                            | 1.73187700   | 3.30489700  | -1.21583300 | C | 2.44910000  | -3.69183100 | -0.42826400 |
| C                                            | 1.72138600   | 4.61083100  | -0.69596500 | C | 1.95526900  | -1.84197500 | -2.11468700 |
| C                                            | 2.56383000   | 3.03705100  | -2.31686200 | H | 3.16121300  | -1.66070300 | -0.34951900 |
| C                                            | 2.51722100   | 5.61905100  | -1.25219100 | C | -1.22991000 | -2.34350000 | 2.05297600  |
| H                                            | 1.07961700   | 4.84306800  | 0.15185700  | C | -1.14464300 | -3.09379000 | -0.35935600 |
| C                                            | 3.36235700   | 4.04052100  | -2.87446800 | H | 0.26643700  | -3.62566900 | 1.18991400  |
| H                                            | 2.60497900   | 2.03745000  | -2.73887300 | C | 2.93458100  | -1.66050400 | 4.20907000  |
| C                                            | 3.34407600   | 5.33806700  | -2.34602800 | H | 3.22650900  | -2.54768400 | 2.26191400  |
| H                                            | 2.48717500   | 6.62214800  | -0.83328700 | H | 1.67459700  | -2.94732100 | 2.99619800  |
| H                                            | 4.00045600   | 3.80798400  | -3.72383800 | C | 3.31447200  | 0.65628200  | 3.24687800  |
| H                                            | 3.96228300   | 6.11827900  | -2.78308300 | H | 3.63377700  | -0.18555400 | 1.28826100  |
|                                              |              |             |             | H | 2.34682100  | 1.00175600  | 1.32968700  |
|                                              |              |             |             | C | 3.55997500  | -4.21999300 | -1.35131200 |
| <b>prox-2</b>                                |              |             |             | H | 1.52495900  | -4.23424400 | -0.65938000 |
| Sum of electronic and thermal Free Energies= | -3851.974237 |             |             | H | 2.69244100  | -3.91499900 | 0.61452400  |
| C                                            | -0.63160100  | 1.21512600  | 0.99965500  | C | 3.03305400  | -2.42347500 | -3.04580600 |
| C                                            | -1.49440400  | 2.39705700  | 0.50431100  | H | 0.97602200  | -2.24302200 | -2.40745100 |
| Ni                                           | -0.14678700  | 0.22579600  | -0.56043700 | H | 1.90948600  | -0.75454000 | -2.24531200 |
| C                                            | -2.27365300  | 1.89989400  | -0.73526200 | C | -2.23299500 | -3.46629300 | 2.36575700  |
| H                                            | -2.71769600  | 2.76140600  | -1.26074800 | H | -1.78595600 | -1.43861100 | 1.78113000  |
| C                                            | -3.38575100  | 0.88555000  | -0.44317000 | H | -0.65264200 | -2.10800700 | 2.95255800  |
| H                                            | -4.14071100  | 1.33113100  | 0.21395500  | C | -2.15885900 | -4.20720000 | -0.05178400 |
| H                                            | -2.95165400  | 0.03062200  | 0.08965200  | H | -1.68027800 | -2.19347400 | -0.69120800 |
| C                                            | -4.05474200  | 0.37963500  | -1.73429200 | H | -0.50437700 | -3.40134300 | -1.19192600 |
| H                                            | -4.57712700  | 1.21741800  | -2.21433600 | C | 3.93001200  | -0.50057400 | 4.04840900  |
| H                                            | -3.26950000  | 0.05252800  | -2.42154400 | H | 3.40768700  | -2.50041500 | 4.73207800  |
| C                                            | -5.02349500  | -0.75315200 | -1.47452800 | H | 2.09114400  | -1.33269800 | 4.83256300  |
| C                                            | -6.27976200  | -0.50710300 | -0.89197800 | H | 4.05487000  | 1.44787500  | 3.08998300  |
| C                                            | -4.67595700  | -2.08231400 | -1.76413800 | H | 2.48601900  | 1.09829900  | 3.81825200  |

|   |             |             |             |                                              |             |             |             |
|---|-------------|-------------|-------------|----------------------------------------------|-------------|-------------|-------------|
| C | 3.23835800  | -3.92818500 | -2.82378500 | C                                            | -3.18640800 | 5.15447500  | 2.55164800  |
| H | 3.68657600  | -5.29757100 | -1.19171000 | H                                            | -1.83314800 | 5.06394400  | 0.87712900  |
| H | 4.51363700  | -3.74366100 | -1.08391000 | C                                            | -3.85515900 | 3.02554100  | 3.48053200  |
| H | 2.76337700  | -2.21942600 | -4.08887500 | H                                            | -3.03858300 | 1.27887400  | 2.53591100  |
| H | 3.98507400  | -1.90987700 | -2.86092000 | C                                            | -3.91890100 | 4.42506500  | 3.49637000  |
| C | -3.06475700 | -3.83286500 | 1.12903700  | H                                            | -3.22363000 | 6.24151600  | 2.55385300  |
| H | -2.88802500 | -3.15177200 | 3.18718000  | H                                            | -4.41894700 | 2.44748800  | 4.20933000  |
| H | -1.68510000 | -4.35179100 | 2.71699400  | H                                            | -4.52827000 | 4.93909700  | 4.23582300  |
| H | -2.76172900 | -4.41019200 | -0.94439900 |                                              |             |             |             |
| H | -1.61537300 | -5.13343200 | 0.18174000  |                                              |             |             |             |
| H | 4.26340500  | -0.14898000 | 5.03235300  | <b>dist-5</b>                                |             |             |             |
| H | 4.82378600  | -0.86340900 | 3.52127100  | Sum of electronic and thermal Free Energies= |             |             |             |
| H | 4.04160600  | -4.29959900 | -3.47144100 | Ni                                           | -0.30231700 | -0.54335200 | 0.23681400  |
| H | 2.32447800  | -4.46901800 | -3.10746400 | C                                            | 1.34056500  | -1.93468100 | 0.36034100  |
| H | -3.74958200 | -4.65805700 | 1.35888500  | H                                            | 1.87332200  | -1.93244900 | 1.31325900  |
| H | -3.68803900 | -2.97592600 | 0.84281200  | C                                            | -0.04996000 | -2.43031100 | 0.57715400  |
| O | -1.27760000 | 1.30984100  | -1.57600700 | H                                            | -0.24824200 | -2.68036400 | 1.62064600  |
| B | 2.92943900  | 2.26139400  | -1.46183900 | C                                            | 8.17893800  | -1.42864600 | -0.34406100 |
| C | 4.25204000  | 1.72960700  | -0.80465100 | C                                            | 6.82826800  | -1.26288600 | -0.67536600 |
| C | 4.83215300  | 2.36443300  | 0.30982000  | C                                            | 5.82723500  | -1.35694700 | 0.30549000  |
| C | 4.85944200  | 0.55315900  | -1.28261500 | C                                            | 6.21305300  | -1.62179400 | 1.63051000  |
| C | 5.96795700  | 1.83734800  | 0.93381100  | C                                            | 7.56136100  | -1.78793900 | 1.96822400  |
| H | 4.37314700  | 3.26739800  | 0.70557300  | C                                            | 8.55080200  | -1.69258500 | 0.98039500  |
| C | 5.98650500  | 0.00910500  | -0.65798800 | H                                            | 8.93954100  | -1.34835500 | -1.11728400 |
| H | 4.42723900  | 0.05392700  | -2.14424800 | H                                            | 6.54807500  | -1.05512200 | -1.70658600 |
| C | 6.54275600  | 0.65162600  | 0.45650200  | H                                            | 5.45051400  | -1.69550400 | 2.40411700  |
| H | 6.39639200  | 2.33707400  | 1.79971500  | H                                            | 7.84038500  | -1.98824000 | 3.00014300  |
| H | 6.42687400  | -0.91259500 | -1.03223500 | H                                            | 9.59891400  | -1.81881800 | 1.24067300  |
| H | 7.41599900  | 0.23137000  | 0.95033000  | C                                            | 4.36619800  | -1.22181700 | -0.06292900 |
| O | 2.24838100  | 3.29377300  | -0.85429200 | C                                            | 3.71427500  | -2.58844000 | -0.34601600 |
| H | 1.42483700  | 3.49041400  | -1.35994300 | H                                            | 4.26177100  | -0.59492700 | -0.95135300 |
| O | 2.48904900  | 1.66738500  | -2.62451700 | H                                            | 3.83012000  | -0.71543100 | 0.74717500  |
| H | 1.63752500  | 2.08104900  | -2.90591400 | C                                            | 2.23725000  | -2.51264700 | -0.75767100 |
| C | -0.51174800 | 3.93609600  | -3.57370900 | H                                            | 4.27003400  | -3.09007800 | -1.14880800 |
| C | 0.47466700  | 4.93295900  | -4.16514300 | H                                            | 3.79704500  | -3.23466000 | 0.53648500  |
| H | -1.32872700 | 4.46288100  | -3.06106200 | H                                            | 1.88814700  | -3.53147400 | -0.96966600 |
| H | -0.95723500 | 3.31963800  | -4.36680400 | O                                            | 2.06001900  | -1.69937900 | -1.93313400 |
| H | -0.02667300 | 5.58911500  | -4.88470000 | C                                            | -6.79409900 | -1.62159800 | 1.84082700  |
| H | 0.91187800  | 5.55380700  | -3.37573000 | C                                            | -5.42333800 | -1.46689700 | 2.08706700  |
| H | 1.28673700  | 4.40886400  | -4.68054600 | C                                            | -4.52132300 | -1.15039100 | 1.05193300  |
| O | 0.17861500  | 3.09543600  | -2.63901100 | C                                            | -5.04779100 | -0.99557700 | -0.24649500 |
| H | -0.46017000 | 2.39483900  | -2.22931500 | C                                            | -6.41485900 | -1.14783200 | -0.50512100 |
| H | 0.25141500  | 1.56629500  | 1.54536600  | C                                            | -7.29408000 | -1.46182000 | 0.54132700  |
| C | -2.32781200 | 3.08235300  | 1.57305800  | H                                            | -7.47190300 | -1.86562100 | 2.65647300  |
| C | -2.40081700 | 4.48635300  | 1.60466600  | H                                            | -5.04461000 | -1.59359800 | 3.09915100  |
| C | -3.06894300 | 2.36479700  | 2.53026700  | H                                            | -4.36530000 | -0.75610000 | -1.05849200 |

|   |             |             |             |                                              |             |             |             |
|---|-------------|-------------|-------------|----------------------------------------------|-------------|-------------|-------------|
| H | -6.79722900 | -1.02477300 | -1.51655900 | H                                            | 2.23703500  | 0.63113700  | -1.37896700 |
| H | -8.35756000 | -1.58155000 | 0.34570200  | C                                            | 3.89719600  | 3.69385500  | -1.49726500 |
| B | -2.96477300 | -0.97446200 | 1.29859200  | H                                            | 2.85029000  | 5.57896000  | -1.20273100 |
| O | -2.52041300 | -1.25132500 | 2.60644400  | H                                            | 2.26075800  | 4.62696700  | -2.56418500 |
| H | -1.56054600 | -1.10002000 | 2.63330500  | H                                            | 4.48947400  | 1.62583200  | -1.81850200 |
| O | -2.17196200 | -0.56712800 | 0.30866800  | H                                            | 3.27412000  | 2.21702600  | -2.94874900 |
| H | 2.54564300  | -2.11835500 | -2.66313000 | H                                            | 4.66216500  | 4.11593000  | -2.16031300 |
| C | -0.84001800 | -3.26277200 | -0.35004400 | H                                            | 4.31504900  | 3.70776400  | -0.48064900 |
| C | -1.80689200 | -4.13968800 | 0.18806900  | C                                            | -0.37321400 | 2.57782500  | 1.49214600  |
| C | -0.75611000 | -3.16469200 | -1.75721200 | C                                            | -1.75131000 | 2.36237000  | 2.15021600  |
| C | -2.64900700 | -4.88981600 | -0.63608300 | C                                            | 0.75203700  | 2.07623400  | 2.42514800  |
| H | -1.90669900 | -4.21952300 | 1.26858600  | H                                            | -0.24072800 | 3.65322200  | 1.32603600  |
| C | -1.59408900 | -3.91975000 | -2.58129200 | C                                            | -1.81761200 | 3.02386300  | 3.53653500  |
| H | -0.04672200 | -2.47282500 | -2.19929500 | H                                            | -1.94086900 | 1.28911600  | 2.24802800  |
| C | -2.54655300 | -4.78798300 | -2.02997000 | H                                            | -2.54693800 | 2.76641200  | 1.51577600  |
| H | -3.38830900 | -5.55199000 | -0.19090800 | C                                            | 0.68079400  | 2.73707300  | 3.81027500  |
| H | -1.51170700 | -3.82171300 | -3.66179700 | H                                            | 0.65279100  | 0.98649400  | 2.53500900  |
| H | -3.20146500 | -5.36916800 | -2.67459200 | H                                            | 1.73612000  | 2.25526800  | 1.97788800  |
| H | 1.34274200  | -0.77490900 | 0.11848700  | C                                            | -0.69525500 | 2.52390200  | 4.45760900  |
| P | -0.23005800 | 1.69498200  | -0.14718200 | H                                            | -2.79769800 | 2.82743900  | 3.98808700  |
| C | -1.74482900 | 2.14232200  | -1.12551500 | H                                            | -1.73360200 | 4.11390200  | 3.42268400  |
| C | -1.97069700 | 3.64046700  | -1.39407700 | H                                            | 1.47386400  | 2.33503000  | 4.45247700  |
| C | -1.79157200 | 1.32682500  | -2.43522300 | H                                            | 0.87176400  | 3.81436200  | 3.70654500  |
| H | -2.55749500 | 1.76234100  | -0.49688400 | H                                            | -0.74312700 | 3.03219800  | 5.42827800  |
| C | -3.30442500 | 3.86489600  | -2.12881000 | H                                            | -0.83988700 | 1.45169000  | 4.65238600  |
| H | -1.15529900 | 4.03219600  | -2.01567100 |                                              |             |             |             |
| H | -1.95918800 | 4.20964800  | -0.45723800 |                                              |             |             |             |
| C | -3.11971400 | 1.56033200  | -3.17416700 | <b>dist-TS3</b>                              |             |             |             |
| H | -0.96086200 | 1.61872500  | -3.09267300 | Sum of electronic and thermal Free Energies= |             |             |             |
| H | -1.66727600 | 0.26369100  | -2.20398600 | Ni                                           | -0.16490000 | -0.48703200 | 0.25419900  |
| C | -3.36817200 | 3.05455600  | -3.43310100 | C                                            | 1.20573900  | -2.07855000 | 0.34645300  |
| H | -3.43961000 | 4.93346100  | -2.33665200 | H                                            | 1.78746300  | -1.96823300 | 1.25992200  |
| H | -4.13118100 | 3.56129600  | -1.47155800 | C                                            | -0.12211800 | -2.50426600 | 0.56646300  |
| H | -3.12371400 | 1.00313700  | -4.11903600 | H                                            | -0.40475600 | -2.63277600 | 1.61063000  |
| H | -3.94046900 | 1.15765400  | -2.56474200 | C                                            | 8.05033800  | -1.73648800 | -0.29099600 |
| H | -4.33929900 | 3.19916800  | -3.92215000 | C                                            | 6.72186900  | -1.49071300 | -0.66033200 |
| H | -2.60413000 | 3.43192500  | -4.12770100 | C                                            | 5.68499400  | -1.55841000 | 0.28483100  |
| C | 1.19677500  | 2.51042300  | -1.05994100 | C                                            | 6.01227100  | -1.87972700 | 1.61317900  |
| C | 1.52141900  | 3.96070800  | -0.64149600 | C                                            | 7.33810800  | -2.12560600 | 1.98900800  |
| C | 2.46850400  | 1.63994100  | -1.02968300 | C                                            | 8.36368800  | -2.05527900 | 1.03655000  |
| H | 0.85028600  | 2.53676000  | -2.10230600 | H                                            | 8.83959700  | -1.67521800 | -1.03676900 |
| C | 2.62708000  | 4.55625900  | -1.53042500 | H                                            | 6.48737600  | -1.23966000 | -1.69336400 |
| H | 1.86653300  | 3.97508400  | 0.39968700  | H                                            | 5.22134200  | -1.93387800 | 2.35945300  |
| H | 0.62937000  | 4.59246400  | -0.68738000 | H                                            | 7.57175800  | -2.36801500 | 3.02318300  |
| C | 3.58644200  | 2.24388300  | -1.89518200 | H                                            | 9.39465200  | -2.24306600 | 1.32653600  |
| H | 2.82459300  | 1.54402600  | 0.00489700  | C                                            | 4.24617300  | -1.33223600 | -0.12422900 |



|   |             |             |             |                                              |             |            |              |
|---|-------------|-------------|-------------|----------------------------------------------|-------------|------------|--------------|
| C | 3.53708700  | -2.65064000 | -0.48924300 | H                                            | -1.55709000 | 0.20831200 | -2.15237700  |
| H | 4.20513500  | -0.66194800 | -0.98570500 | C                                            | -3.28036700 | 2.96126100 | -3.43303000  |
| H | 3.70791600  | -0.83265800 | 0.68804400  | H                                            | -3.35963300 | 4.86253800 | -2.37645600  |
| C | 2.05464700  | -2.49443500 | -0.86220500 | H                                            | -4.03916200 | 3.50478500 | -1.47949300  |
| H | 4.06132000  | -3.11498300 | -1.33423900 | H                                            | -3.02351300 | 0.89769800 | -4.07678700  |
| H | 3.61103000  | -3.35897400 | 0.34515100  | H                                            | -3.83646800 | 1.07853400 | -2.52331600  |
| H | 1.68247500  | -3.47825200 | -1.18081900 | H                                            | -4.25432600 | 3.08926300 | -3.92101700  |
| O | 1.87810500  | -1.56750900 | -1.95131800 | H                                            | -2.52155100 | 3.32901800 | -4.13840600  |
| C | -6.68785100 | -1.60310800 | 1.90699100  | C                                            | 1.28450400  | 2.50777800 | -1.05958100  |
| C | -5.32428100 | -1.39602200 | 2.15560400  | C                                            | 1.58243700  | 3.97050000 | -0.66074300  |
| C | -4.42053800 | -1.11143400 | 1.11285200  | C                                            | 2.57843100  | 1.67328500 | -1.04073100  |
| C | -4.93875400 | -1.04316200 | -0.19638100 | H                                            | 0.92387900  | 2.51619300 | -2.09724900  |
| C | -6.29800500 | -1.24963800 | -0.45807400 | C                                            | 2.65281300  | 4.58342000 | -1.58064700  |
| C | -7.17894700 | -1.53063500 | 0.59639600  | H                                            | 1.95171300  | 4.00092400 | 0.37187100   |
| H | -7.36667500 | -1.82106600 | 2.72921100  | H                                            | 0.67678600  | 4.58310200 | -0.69177000  |
| H | -4.95239100 | -1.45725300 | 3.17636200  | C                                            | 3.66285800  | 2.29295100 | -1.93673800  |
| H | -4.25520200 | -0.83185900 | -1.01532500 | H                                            | 2.95610800  | 1.60162900 | -0.01192900  |
| H | -6.67304100 | -1.19503100 | -1.47830000 | H                                            | 2.36375000  | 0.65530100 | -1.36895400  |
| H | -8.23645600 | -1.69234000 | 0.39840400  | C                                            | 3.94585100  | 3.75550600 | -1.56593100  |
| B | -2.86889500 | -0.88620600 | 1.35792400  | H                                            | 2.85523600  | 5.61538300 | -1.26904600  |
| O | -2.42549700 | -1.12385900 | 2.67938900  | H                                            | 2.26179600  | 4.63259300 | -2.60657900  |
| H | -1.47355100 | -0.93024200 | 2.71027100  | H                                            | 4.58089600  | 1.69588700 | -1.86807800  |
| O | -2.07318700 | -0.49209400 | 0.37133700  | H                                            | 3.33132900  | 2.24291800 | -2.98365600  |
| H | 2.33835400  | -1.93707200 | -2.72388500 | H                                            | 4.68365600  | 4.18859500 | -2.25229100  |
| C | -1.02720100 | -3.18754100 | -0.37978100 | H                                            | 4.38628500  | 3.79456100 | -0.55958900  |
| C | -2.01734900 | -4.04358400 | 0.14124400  | C                                            | -0.26767100 | 2.59891200 | 1.50274600   |
| C | -0.99345300 | -2.98257300 | -1.77508500 | C                                            | -1.65056000 | 2.42757100 | 2.16224100   |
| C | -2.93075600 | -4.68816800 | -0.69719200 | C                                            | 0.85138400  | 2.10139700 | 2.44512800   |
| H | -2.07845800 | -4.19495400 | 1.21679100  | H                                            | -0.11661500 | 3.66733500 | 1.31172400   |
| C | -1.90649500 | -3.62672400 | -2.61292800 | C                                            | -1.70202900 | 3.12517900 | 3.53132800   |
| H | -0.27160400 | -2.28783300 | -2.19221800 | H                                            | -1.86468900 | 1.36281800 | 2.28674500   |
| C | -2.87920500 | -4.48520800 | -2.08205000 | H                                            | -2.43614600 | 2.83283200 | 1.51618600   |
| H | -3.68862800 | -5.34009600 | -0.26910000 | C                                            | 0.79016300  | 2.79458900 | 3.81458300   |
| H | -1.86883700 | -3.44719900 | -3.68522100 | H                                            | 0.73954000  | 1.01563000 | 2.57551400   |
| H | -3.59351500 | -4.97854200 | -2.73671000 | H                                            | 1.83650400  | 2.25793800 | 1.99142500   |
| H | 1.28046000  | -0.35741000 | 0.12222700  | C                                            | -0.59059100 | 2.62313300 | 4.46451200   |
| P | -0.13049500 | 1.69467600  | -0.12290000 | H                                            | -2.68609900 | 2.96132000 | 3.98702000   |
| C | -1.64717000 | 2.10870700  | -1.11207600 | H                                            | -1.59416800 | 4.20999000 | 3.39080300   |
| C | -1.87896600 | 3.60027200  | -1.41226300 | H                                            | 1.57451100  | 2.39196000 | 4.46694700   |
| C | -1.68902800 | 1.26531800  | -2.40458600 | H                                            | 1.00199200  | 3.86539200 | 3.68708100   |
| H | -2.45564200 | 1.73719100  | -0.47435700 | H                                            | -0.62887800 | 3.15383100 | 5.42349900   |
| C | -3.21710100 | 3.79953700  | -2.14644900 | H                                            | -0.75710500 | 1.55867200 | 4.68304500   |
| H | -1.06906200 | 3.98323700  | -2.04609200 |                                              |             |            |              |
| H | -1.86817700 | 4.19052800  | -0.48854600 |                                              |             |            |              |
| C | -3.02085300 | 1.47452300  | -3.14375600 | <b>dist-6</b>                                |             |            |              |
| H | -0.86207800 | 1.54998400  | -3.06984600 | Sum of electronic and thermal Free Energies= |             |            | -3696.924475 |

|    |             |             |             |   |             |             |             |
|----|-------------|-------------|-------------|---|-------------|-------------|-------------|
| Ni | -0.35330600 | 0.17290400  | -0.94931600 | C | -3.29934300 | 1.16721200  | 3.87470700  |
| C  | 0.26256600  | -0.16615800 | -3.01415400 | H | -1.29467300 | 1.94661700  | 3.69426300  |
| C  | -0.89611900 | 0.59432900  | -2.95154300 | H | -1.35316300 | 0.20336500  | 3.94938900  |
| H  | -1.79463900 | -0.01199900 | -3.03548000 | C | -3.92262900 | 2.11902400  | 1.60704000  |
| C  | 5.97686400  | -3.16907100 | -0.48805300 | H | -1.93769500 | 2.92152600  | 1.31988000  |
| C  | 5.31483500  | -2.58226700 | -1.57460300 | H | -2.43024100 | 1.78535900  | 0.06348500  |
| C  | 4.92378300  | -1.23471100 | -1.53733800 | C | -4.01529400 | 2.30465500  | 3.12953200  |
| C  | 5.20820300  | -0.48790000 | -0.38076800 | H | -3.33600700 | 1.33782200  | 4.95756600  |
| C  | 5.86733200  | -1.06835600 | 0.70738500  | H | -3.82289800 | 0.22026000  | 3.68328600  |
| C  | 6.25520500  | -2.41392000 | 0.65766800  | H | -4.39499300 | 2.96255400  | 1.08897200  |
| H  | 6.27225900  | -4.21462800 | -0.53561600 | H | -4.47960100 | 1.21715200  | 1.31794500  |
| H  | 5.09793100  | -3.17808500 | -2.45933600 | H | -5.06500100 | 2.36077600  | 3.44251700  |
| H  | 4.90428100  | 0.55643600  | -0.33138700 | H | -3.55064200 | 3.26216600  | 3.40476600  |
| H  | 6.07346300  | -0.47423600 | 1.59463400  | C | 0.96384100  | 1.98885400  | 1.77107400  |
| H  | 6.76444300  | -2.86899400 | 1.50360400  | C | 1.65702600  | 1.77798400  | 3.13681200  |
| C  | 4.13367800  | -0.61208600 | -2.67031900 | C | 1.98319600  | 2.49562200  | 0.73022100  |
| C  | 2.62897300  | -0.67458600 | -2.35705400 | H | 0.21684200  | 2.78376400  | 1.89963400  |
| H  | 4.34505700  | -1.12481800 | -3.61587300 | C | 2.34769000  | 3.06710200  | 3.61347600  |
| H  | 4.44206200  | 0.43327500  | -2.78828100 | H | 2.41468600  | 0.99001400  | 3.04471700  |
| C  | 1.72162500  | 0.08005300  | -3.34438800 | H | 0.94244300  | 1.44398000  | 3.89462000  |
| H  | 2.31552500  | -1.72442900 | -2.30985200 | C | 2.69306100  | 3.77102100  | 1.21240400  |
| H  | 2.45253800  | -0.24569400 | -1.36893900 | H | 2.72822200  | 1.71339800  | 0.53279200  |
| H  | 1.85912600  | -0.35242500 | -4.34974600 | H | 1.47809000  | 2.69009300  | -0.21900100 |
| O  | 2.04536600  | 1.47253800  | -3.39601200 | C | 3.36252000  | 3.57281900  | 2.57922500  |
| C  | -5.38089400 | -4.49963800 | -0.76986000 | H | 2.83996800  | 2.88241200  | 4.57594700  |
| C  | -4.07761700 | -4.02532400 | -0.97088700 | H | 1.58754700  | 3.84112200  | 3.78866500  |
| C  | -3.74157600 | -2.67604800 | -0.74174200 | H | 3.43215400  | 4.08243000  | 0.46423100  |
| C  | -4.76785800 | -1.81645700 | -0.29927100 | H | 1.95556000  | 4.58277400  | 1.28537000  |
| C  | -6.07308700 | -2.27835200 | -0.09255600 | H | 3.82073300  | 4.50926100  | 2.91961100  |
| C  | -6.38376100 | -3.62539000 | -0.32903500 | H | 4.17435500  | 2.83803300  | 2.48167400  |
| H  | -5.61642900 | -5.54605100 | -0.95386400 | C | 0.62757800  | -0.98711600 | 2.03111800  |
| H  | -3.30528100 | -4.71278700 | -1.30965600 | C | -0.37394100 | -2.15807300 | 2.07638000  |
| H  | -4.52516500 | -0.77224900 | -0.11415900 | C | 1.92134300  | -1.41315500 | 1.30430600  |
| H  | -6.84753300 | -1.59535000 | 0.25129000  | H | 0.87429600  | -0.71408900 | 3.06318000  |
| H  | -7.39650100 | -3.98984100 | -0.17041000 | C | 0.26212400  | -3.40141900 | 2.72095700  |
| B  | -2.27308700 | -2.10444700 | -0.94418800 | H | -0.69495500 | -2.40000700 | 1.05958300  |
| O  | -1.30691300 | -3.05868300 | -1.34799000 | H | -1.27281900 | -1.87636100 | 2.63436600  |
| H  | -0.44619900 | -2.60943100 | -1.38072800 | C | 2.55453900  | -2.65376800 | 1.94872900  |
| O  | -1.99696400 | -0.82724100 | -0.72231400 | H | 1.67260800  | -1.63780000 | 0.25976300  |
| H  | 2.87900200  | 1.56972700  | -3.88254000 | H | 2.64844600  | -0.59463800 | 1.27801000  |
| H  | 0.83124600  | 0.97504700  | -0.98955600 | C | 1.55398900  | -3.81738200 | 2.00134300  |
| P  | -0.07010100 | 0.52435800  | 1.19067800  | H | -0.46185500 | -4.22527200 | 2.71292700  |
| C  | -1.76325700 | 0.82398700  | 1.89515800  | H | 0.48778300  | -3.18780100 | 3.77531100  |
| C  | -1.83547600 | 1.03222500  | 3.41858100  | H | 3.45227100  | -2.93608500 | 1.38755200  |
| C  | -2.46490000 | 1.97453300  | 1.14088600  | H | 2.88261000  | -2.40611800 | 2.96822700  |
| H  | -2.29481300 | -0.09522600 | 1.62540100  | H | 2.00337900  | -4.68611300 | 2.49761800  |

|                                              |              |             |             |   |             |             |             |
|----------------------------------------------|--------------|-------------|-------------|---|-------------|-------------|-------------|
| H                                            | 1.31025400   | -4.12795700 | 0.97534900  | C | -0.16556400 | -5.76300900 | -0.78857700 |
| H                                            | 0.05114000   | -1.22941900 | -3.13972300 | H | -1.69074700 | -6.28782200 | 0.66997600  |
| C                                            | -1.22868500  | 2.03168600  | -2.85382000 | H | -0.34198100 | -5.36889800 | 1.33371400  |
| C                                            | -0.31657900  | 3.08114400  | -2.60988800 | H | 1.28439500  | -4.77686600 | -2.07986300 |
| C                                            | -2.60368300  | 2.35339800  | -2.91275600 | H | 1.50335000  | -4.46137900 | -0.36389800 |
| C                                            | -0.76738700  | 4.39163000  | -2.44155000 | H | 0.43335900  | -6.66853500 | -0.63398300 |
| H                                            | 0.73803800   | 2.85582100  | -2.54609400 | H | -0.83962700 | -5.96781600 | -1.63201700 |
| C                                            | -3.05309200  | 3.66529000  | -2.74817200 | C | -3.18985600 | -1.46172200 | -1.10103700 |
| H                                            | -3.32880700  | 1.55897700  | -3.07425000 | C | -4.24593600 | -0.36712100 | -0.82751900 |
| C                                            | -2.13448100  | 4.69456200  | -2.50890000 | C | -2.85685500 | -1.50055200 | -2.61030000 |
| H                                            | -0.04664600  | 5.18256200  | -2.24653500 | H | -3.62519300 | -2.42579100 | -0.81275900 |
| H                                            | -4.11755400  | 3.88155500  | -2.79510000 | C | -5.49811000 | -0.54927800 | -1.70281800 |
| H                                            | -2.47853900  | 5.71655300  | -2.36992400 | H | -3.80553800 | 0.61835700  | -1.02774400 |
|                                              |              |             |             | H | -4.55240400 | -0.37037600 | 0.22178400  |
|                                              |              |             |             | C | -4.11273200 | -1.67592800 | -3.47921400 |
| <b>dist-7</b>                                |              |             |             | H | -2.35052500 | -0.56348300 | -2.87647700 |
| Sum of electronic and thermal Free Energies= | -4010.068658 |             |             | H | -2.15589300 | -2.30731200 | -2.83337400 |
| Ni                                           | -0.34920500  | 0.38502200  | -0.73697000 | C | -5.15067200 | -0.58318300 | -3.19616600 |
| P                                            | -1.61889400  | -1.24736700 | -0.08356300 | H | -6.20694800 | 0.26048200  | -1.49107700 |
| C                                            | -2.25679800  | -0.75986700 | 1.61056900  | H | -5.99811200 | -1.48809400 | -1.42571600 |
| C                                            | -3.23722300  | -1.70820100 | 2.32761300  | H | -3.82614400 | -1.66968600 | -4.53797700 |
| C                                            | -1.13550900  | -0.34102100 | 2.57980300  | H | -4.55796100 | -2.66046400 | -3.27745500 |
| H                                            | -2.80357600  | 0.15790500  | 1.36042200  | H | -6.05436100 | -0.74697400 | -3.79581100 |
| C                                            | -3.84651200  | -1.01119800 | 3.55748300  | H | -4.74095800 | 0.39182200  | -3.49509100 |
| H                                            | -2.69714100  | -2.60001900 | 2.66525700  | P | 1.90903100  | 0.10642900  | -0.06517600 |
| H                                            | -4.03035600  | -2.05132200 | 1.65536400  | C | 2.57587500  | -1.58173000 | 0.50825000  |
| C                                            | -1.71676100  | 0.34596500  | 3.82612100  | C | 4.04105300  | -1.94097100 | 0.16940600  |
| H                                            | -0.57395200  | -1.22963700 | 2.89157600  | C | 2.30496600  | -1.83881800 | 2.00673600  |
| H                                            | -0.43115800  | 0.32898300  | 2.07782700  | H | 1.95387000  | -2.28450500 | -0.04846400 |
| C                                            | -2.75333800  | -0.54231400 | 4.53107500  | C | 4.37617000  | -3.38483400 | 0.58832900  |
| H                                            | -4.53909100  | -1.69364700 | 4.06471500  | H | 4.72879100  | -1.25217200 | 0.67326800  |
| H                                            | -4.43823700  | -0.14672800 | 3.22534700  | H | 4.22769100  | -1.84537800 | -0.90354900 |
| H                                            | -0.90474600  | 0.60746700  | 4.51543700  | C | 2.62492700  | -3.28783900 | 2.40780700  |
| H                                            | -2.18878800  | 1.29033900  | 3.52329000  | H | 2.92499000  | -1.17094700 | 2.61635400  |
| H                                            | -3.20120800  | -0.00575500 | 5.37610800  | H | 1.26625500  | -1.60936000 | 2.25250100  |
| H                                            | -2.24572300  | -1.42340700 | 4.94816600  | C | 4.07857200  | -3.64546600 | 2.07087400  |
| C                                            | -0.86567600  | -2.96735700 | 0.00251700  | H | 5.43147900  | -3.58889100 | 0.36947600  |
| C                                            | -1.80732500  | -4.15361800 | 0.30348800  | H | 3.78957800  | -4.08025800 | -0.02671200 |
| C                                            | -0.06405900  | -3.27855200 | -1.28414000 | H | 2.43587600  | -3.41984400 | 3.48014300  |
| H                                            | -0.15273500  | -2.88129800 | 0.83390900  | H | 1.94650700  | -3.97366700 | 1.88319000  |
| C                                            | -1.00429300  | -5.45834100 | 0.46123100  | H | 4.28356600  | -4.69327300 | 2.32162500  |
| H                                            | -2.51622400  | -4.27611000 | -0.52482700 | H | 4.75100600  | -3.03312500 | 2.68811700  |
| H                                            | -2.39948700  | -3.97776200 | 1.20253500  | C | 2.33159100  | 1.25814600  | 1.35287300  |
| C                                            | 0.74432900   | -4.57835800 | -1.14624800 | C | 3.83263200  | 1.45005400  | 1.65388100  |
| H                                            | -0.76042000  | -3.40609400 | -2.11879500 | C | 1.60088100  | 2.61272100  | 1.25045100  |
| H                                            | 0.57842600   | -2.43445000 | -1.55258400 | H | 1.89114700  | 0.74530700  | 2.21794600  |

|   |             |             |             |                                              |              |             |             |
|---|-------------|-------------|-------------|----------------------------------------------|--------------|-------------|-------------|
| C | 4.03791200  | 2.30757000  | 2.91575900  |                                              |              |             |             |
| H | 4.32477500  | 1.93678100  | 0.80423400  |                                              |              |             |             |
| H | 4.32747700  | 0.48445400  | 1.78932800  | <b>dist-TS4</b>                              |              |             |             |
| C | 1.81551900  | 3.45150800  | 2.51896100  | Sum of electronic and thermal Free Energies= | -4010.043924 |             |             |
| H | 1.95510400  | 3.17182200  | 0.37906800  | Ni                                           | 0.04092200   | 0.16765200  | 0.47835300  |
| H | 0.53565400  | 2.44527400  | 1.08464400  | P                                            | 2.08602300   | -0.17058900 | 0.03068000  |
| C | 3.30912600  | 3.65565900  | 2.81280400  | C                                            | 2.55913700   | 0.55472800  | -1.63389800 |
| H | 5.11055100  | 2.46334300  | 3.08501300  | C                                            | 3.99376500   | 0.29640200  | -2.12926100 |
| H | 3.65663300  | 1.75663400  | 3.78728400  | C                                            | 1.53305400   | 0.17622500  | -2.72082900 |
| H | 1.30949500  | 4.41877700  | 2.40992600  | H                                            | 2.45641000   | 1.63442300  | -1.46804400 |
| H | 1.34412700  | 2.94253200  | 3.37237300  | C                                            | 4.26792100   | 1.06538500  | -3.43414200 |
| H | 3.44365200  | 4.23111800  | 3.73702200  | H                                            | 4.12675800   | -0.77606500 | -2.31801500 |
| H | 3.75780600  | 4.24718300  | 2.00204600  | H                                            | 4.72745800   | 0.58195300  | -1.36713200 |
| C | 3.04321700  | 0.51065100  | -1.50441300 | C                                            | 1.80717800   | 0.92890200  | -4.03259800 |
| C | 2.55980700  | -0.32343700 | -2.71307800 | H                                            | 1.58399100   | -0.90283100 | -2.91517100 |
| C | 3.16067700  | 1.99958300  | -1.88723400 | H                                            | 0.51900300   | 0.38244700  | -2.35893500 |
| H | 4.04812600  | 0.17605200  | -1.22615000 | C                                            | 3.24579900   | 0.70352500  | -4.52285300 |
| C | 3.45654300  | -0.12488300 | -3.94469400 | H                                            | 5.28645400   | 0.85467200  | -3.78269900 |
| H | 1.53105800  | -0.02003900 | -2.94882300 | H                                            | 4.21835400   | 2.14463800  | -3.23210000 |
| H | 2.52051400  | -1.38939100 | -2.45705900 | H                                            | 1.08841000   | 0.61351900  | -4.79894700 |
| C | 4.07324500  | 2.18062100  | -3.11232400 | H                                            | 1.64416300   | 2.00315200  | -3.87088600 |
| H | 2.16491300  | 2.38957600  | -2.09866400 | H                                            | 3.43444700   | 1.28836100  | -5.43140900 |
| H | 3.56246400  | 2.57843400  | -1.05112000 | H                                            | 3.37118200   | -0.35418300 | -4.79479600 |
| C | 3.57748500  | 1.36089800  | -4.31246300 | C                                            | 2.58522100   | -1.99166300 | -0.05694400 |
| H | 3.05706700  | -0.69917600 | -4.78975000 | C                                            | 4.06878000   | -2.33796200 | 0.19131100  |
| H | 4.45682700  | -0.52802000 | -3.73164900 | C                                            | 1.69385600   | -2.85513000 | 0.86059800  |
| H | 4.12566100  | 3.24502300  | -3.37376300 | H                                            | 2.34679900   | -2.26591300 | -1.09492600 |
| H | 5.09636100  | 1.86661200  | -2.85905700 | C                                            | 4.32655100   | -3.83757300 | -0.04612100 |
| H | 4.25116800  | 1.48830000  | -5.16887000 | H                                            | 4.33105500   | -2.09839400 | 1.22931800  |
| H | 2.59208000  | 1.73673900  | -4.62290600 | H                                            | 4.73120000   | -1.74526400 | -0.44447900 |
| C | -2.75935900 | 5.82697600  | 0.35403200  | C                                            | 1.94214200   | -4.35411000 | 0.63662700  |
| C | -1.85183400 | 5.26629500  | -0.55411800 | H                                            | 1.90119800   | -2.60947900 | 1.90996600  |
| C | -1.46319300 | 3.91135000  | -0.47887200 | H                                            | 0.64457000   | -2.60537600 | 0.69539800  |
| C | -2.03285700 | 3.14328700  | 0.55661000  | C                                            | 3.42249700   | -4.71306000 | 0.83514200  |
| C | -2.94363900 | 3.68823100  | 1.46849100  | H                                            | 5.38211800   | -4.06549000 | 0.14729800  |
| C | -3.31117100 | 5.03685400  | 1.37123500  | H                                            | 4.14072200   | -4.07097900 | -1.10403100 |
| H | -3.03745400 | 6.87579500  | 0.27038200  | H                                            | 1.30987000   | -4.94224200 | 1.31350000  |
| H | -1.43308200 | 5.89147300  | -1.33907800 | H                                            | 1.64070800   | -4.61757000 | -0.38623300 |
| H | -1.76062200 | 2.09603000  | 0.64366700  | H                                            | 3.59119800   | -5.77481100 | 0.61719500  |
| H | -3.36739900 | 3.06481800  | 2.25345200  | H                                            | 3.69175000   | -4.55872400 | 1.88963500  |
| H | -4.01750300 | 5.46644700  | 2.07844600  | C                                            | 3.32213100   | 0.58835800  | 1.22245800  |
| B | -0.42327000 | 3.29854500  | -1.52328800 | C                                            | 3.37943900   | 2.12548300  | 1.10156500  |
| O | 0.01408500  | 4.23531200  | -2.49591400 | C                                            | 2.94242800   | 0.17295300  | 2.66117600  |
| H | 0.62754500  | 3.76888800  | -3.08702300 | H                                            | 4.32009100   | 0.19552300  | 0.99493700  |
| O | 0.06313900  | 2.06388200  | -1.54776200 | C                                            | 4.30716000   | 2.74759100  | 2.15906500  |
| H | -1.71134900 | 0.70956700  | -1.09986500 | H                                            | 2.37114500   | 2.54153600  | 1.22484400  |

|   |             |             |             |                                              |              |             |             |
|---|-------------|-------------|-------------|----------------------------------------------|--------------|-------------|-------------|
| H | 3.72409700  | 2.41985100  | 0.10474900  | C                                            | -2.78675700  | -1.34236800 | 1.63309900  |
| C | 3.86633900  | 0.80724800  | 3.71273400  | C                                            | -1.97981300  | -2.33123800 | 2.50329300  |
| H | 1.90394400  | 0.47819000  | 2.84806400  | C                                            | -2.99758900  | -0.02335300 | 2.40778800  |
| H | 2.96969300  | -0.91675200 | 2.76309100  | H                                            | -3.76431600  | -1.78707600 | 1.40688200  |
| C | 3.89939300  | 2.33595100  | 3.58028000  | C                                            | -2.64652400  | -2.56513400 | 3.86923300  |
| H | 4.29610200  | 3.83984700  | 2.05796000  | H                                            | -0.96912600  | -1.92368700 | 2.65099300  |
| H | 5.33999500  | 2.42203800  | 1.97061400  | H                                            | -1.86149200  | -3.29300800 | 1.99287400  |
| H | 3.53526900  | 0.51618300  | 4.71735800  | C                                            | -3.68148800  | -0.26151100 | 3.76277500  |
| H | 4.88403900  | 0.41110500  | 3.58720600  | H                                            | -2.02100000  | 0.44795300  | 2.56507500  |
| H | 4.58783400  | 2.76955100  | 4.31601800  | H                                            | -3.58584900  | 0.68596200  | 1.81744500  |
| H | 2.90094400  | 2.73955400  | 3.80040400  | C                                            | -2.87782600  | -1.24752000 | 4.62260000  |
| P | -1.86514400 | -0.99767500 | 0.04136800  | H                                            | -2.02864400  | -3.24557400 | 4.46823500  |
| C | -1.73833600 | -2.67583500 | -0.78521300 | H                                            | -3.61197700  | -3.06742200 | 3.71501800  |
| C | -3.06493300 | -3.38164500 | -1.12255500 | H                                            | -3.80139500  | 0.69399100  | 4.28890900  |
| C | -0.83140000 | -2.58955100 | -2.02742700 | H                                            | -4.69231800  | -0.66154100 | 3.59860800  |
| H | -1.21054500 | -3.29855200 | -0.05251700 | H                                            | -3.39202200  | -1.43736000 | 5.57281100  |
| C | -2.81100300 | -4.77398600 | -1.72749900 | H                                            | -1.90564100  | -0.79823900 | 4.87026200  |
| H | -3.62430800 | -2.78287600 | -1.85155000 | C                                            | -1.16624400  | 5.98104100  | -1.01493700 |
| H | -3.69464700 | -3.47220100 | -0.23037700 | C                                            | -1.35833900  | 5.19291900  | 0.12657600  |
| C | -0.59406700 | -3.97347100 | -2.65233900 | C                                            | -0.70527200  | 3.95358000  | 0.28717300  |
| H | -1.28753500 | -1.93049300 | -2.77885300 | C                                            | 0.15349100   | 3.53825300  | -0.74888800 |
| H | 0.11832000  | -2.12889700 | -1.74713800 | C                                            | 0.35653700   | 4.31673200  | -1.89259000 |
| C | -1.91655600 | -4.68566400 | -2.97343900 | C                                            | -0.30501200  | 5.54428600  | -2.03007300 |
| H | -3.76745000 | -5.24971000 | -1.97698000 | H                                            | -1.68612500  | 6.93149500  | -1.11578600 |
| H | -2.32539900 | -5.41185600 | -0.97557200 | H                                            | -2.03203900  | 5.54053400  | 0.90613100  |
| H | 0.01782800  | -3.87184700 | -3.55723700 | H                                            | 0.65176300   | 2.57624900  | -0.66701100 |
| H | -0.01768900 | -4.58865200 | -1.94849500 | H                                            | 1.02326100   | 3.96748500  | -2.67778500 |
| H | -1.72135400 | -5.68776800 | -3.37442600 | H                                            | -0.15356600  | 6.15205800  | -2.91947300 |
| H | -2.44724800 | -4.12763700 | -3.75795600 | B                                            | -0.94981300  | 3.06805600  | 1.57767000  |
| C | -3.05141100 | -0.04859300 | -1.07359900 | O                                            | -1.88470800  | 3.58843800  | 2.48714900  |
| C | -4.56259100 | -0.21337100 | -0.80882100 | H                                            | -1.97289200  | 2.95634600  | 3.21991600  |
| C | -2.66715800 | 1.44386600  | -1.10302300 | O                                            | -0.34794000  | 1.89858100  | 1.87398200  |
| H | -2.84507000 | -0.45360400 | -2.07448700 | H                                            | 0.64849500   | 1.39250600  | 1.06149700  |
| C | -5.38930600 | 0.56666300  | -1.84744100 |                                              |              |             |             |
| H | -4.80783200 | 0.16800500  | 0.18884900  |                                              |              |             |             |
| H | -4.85297200 | -1.26738400 | -0.81872100 | <b>dist-5-toluene</b>                        |              |             |             |
| C | -3.50163900 | 2.23370900  | -2.12045000 | Sum of electronic and thermal Free Energies= | -3696.919325 |             |             |
| H | -2.80728100 | 1.87833200  | -0.10577200 | Ni                                           | -0.28128500  | -0.51710700 | 0.29252300  |
| H | -1.60164900 | 1.54651900  | -1.32938400 | C                                            | 1.32314800   | -1.95005500 | 0.37648100  |
| C | -5.00664000 | 2.05487600  | -1.87081100 | H                                            | 1.85906600   | -1.97076300 | 1.32792700  |
| H | -6.45834500 | 0.45127000  | -1.62947600 | C                                            | -0.07777900  | -2.41504600 | 0.59314600  |
| H | -5.22033500 | 0.13227800  | -2.84303100 | H                                            | -0.27801900  | -2.69518100 | 1.62836900  |
| H | -3.22518100 | 3.29441300  | -2.07682300 | C                                            | 8.15743800   | -1.50797400 | -0.35768100 |
| H | -3.25885600 | 1.88239300  | -3.13359600 | C                                            | 6.80565500   | -1.32947600 | -0.67456300 |
| H | -5.58740700 | 2.58508700  | -2.63567900 | C                                            | 5.81296000   | -1.43163800 | 0.31289900  |
| H | -5.26735900 | 2.50769100  | -0.90357400 | C                                            | 6.20859400   | -1.71703900 | 1.62996600  |

|   |             |             |             |   |             |            |             |
|---|-------------|-------------|-------------|---|-------------|------------|-------------|
| C | 7.55796500  | -1.89586400 | 1.95352100  | C | -1.98840000 | 3.59988500 | -1.41478900 |
| C | 8.53867300  | -1.79289100 | 0.95890500  | C | -1.85048400 | 1.23944400 | -2.35962400 |
| H | 8.91201500  | -1.42068000 | -1.13603100 | H | -2.54988400 | 1.76039500 | -0.42169300 |
| H | 6.51828000  | -1.10364100 | -1.70021900 | C | -3.34446100 | 3.79831400 | -2.11557500 |
| H | 5.45267700  | -1.79606400 | 2.40983900  | H | -1.19209100 | 3.96389100 | -2.07767600 |
| H | 7.84482100  | -2.11189800 | 2.98008800  | H | -1.94603600 | 4.20794300 | -0.50302800 |
| H | 9.58818000  | -1.92896800 | 1.20828400  | C | -3.20122500 | 1.44945700 | -3.06347700 |
| C | 4.34963600  | -1.28313700 | -0.04103100 | H | -1.03850300 | 1.49318800 | -3.05638700 |
| C | 3.68325600  | -2.64125100 | -0.33467500 | H | -1.73095000 | 0.18742700 | -2.08200700 |
| H | 4.23905600  | -0.64277000 | -0.91951000 | C | -3.45238400 | 2.93190800 | -3.38032100 |
| H | 3.82374500  | -0.78212600 | 0.77963400  | H | -3.48403400 | 4.85755400 | -2.36482800 |
| C | 2.20696100  | -2.54179100 | -0.74492300 | H | -4.15014100 | 3.52634000 | -1.41994100 |
| H | 4.23459800  | -3.14212300 | -1.14145600 | H | -3.23984500 | 0.85022400 | -3.98148200 |
| H | 3.76301600  | -3.29681300 | 0.54140500  | H | -4.00058700 | 1.07780000 | -2.40859900 |
| H | 1.83352400  | -3.55125500 | -0.96057200 | H | -4.43824800 | 3.06028300 | -3.84359400 |
| O | 2.05153300  | -1.72001900 | -1.91778000 | H | -2.71053700 | 3.27573700 | -4.11578700 |
| C | -6.75222500 | -1.63607900 | 1.86712800  | C | 1.18703700  | 2.48679900 | -1.12031900 |
| C | -5.39544600 | -1.42985300 | 2.14702500  | C | 1.52448000  | 3.94996600 | -0.76298500 |
| C | -4.46702400 | -1.17612000 | 1.11980800  | C | 2.45820300  | 1.61484000 | -1.09461300 |
| C | -4.94526600 | -1.14334400 | -0.20485800 | H | 0.81151100  | 2.47595400 | -2.15320400 |
| C | -6.29745600 | -1.35146200 | -0.49599200 | C | 2.60804100  | 4.51217200 | -1.69962000 |
| C | -7.20685200 | -1.59649900 | 0.54245100  | H | 1.89601500  | 3.99993800 | 0.26826400  |
| H | -7.45454000 | -1.82856400 | 2.67609700  | H | 0.63154100  | 4.58086900 | -0.80731200 |
| H | -5.04629200 | -1.46732500 | 3.17685700  | C | 3.55577600  | 2.18625500 | -2.00677300 |
| H | -4.23353600 | -0.96437400 | -1.00732600 | H | 2.84041800  | 1.55146000 | -0.06644300 |
| H | -6.64495100 | -1.32760800 | -1.52729000 | H | 2.21568200  | 0.59638200 | -1.40535300 |
| H | -8.25997000 | -1.75832200 | 0.32095100  | C | 3.87769400  | 3.64889900 | -1.66858200 |
| B | -2.92769700 | -0.94648100 | 1.39557600  | H | 2.84101800  | 5.54553700 | -1.41508200 |
| O | -2.47860800 | -1.22387100 | 2.69945000  | H | 2.21589800  | 4.54780600 | -2.72581400 |
| H | -1.52534600 | -1.03806700 | 2.72419000  | H | 4.46007600  | 1.56979200 | -1.92974900 |
| O | -2.13836600 | -0.49316100 | 0.41880000  | H | 3.21878500  | 2.12201800 | -3.05117900 |
| H | 2.48112400  | -2.17473500 | -2.66048300 | H | 4.62627800  | 4.04625300 | -2.36461400 |
| C | -0.90694400 | -3.17569900 | -0.36231100 | H | 4.32214600  | 3.69811100 | -0.66440600 |
| C | -1.90856700 | -4.02893800 | 0.14622400  | C | -0.31272700 | 2.63451400 | 1.47363400  |
| C | -0.83504200 | -3.00747100 | -1.76285500 | C | -1.67297000 | 2.43772900 | 2.17451100  |
| C | -2.79714000 | -4.69134200 | -0.70216900 | C | 0.83664100  | 2.15509600 | 2.38855200  |
| H | -2.00707400 | -4.14942700 | 1.22291400  | H | -0.18274300 | 3.70526400 | 1.27574800  |
| C | -1.71933400 | -3.67673400 | -2.61097200 | C | -1.70074000 | 3.13290800 | 3.54528200  |
| H | -0.10428900 | -2.32100300 | -2.17743000 | H | -1.86559000 | 1.36793700 | 2.30131000  |
| C | -2.70570100 | -4.52374600 | -2.08938500 | H | -2.48474400 | 2.82734200 | 1.55198700  |
| H | -3.57041000 | -5.32847200 | -0.27951500 | C | 0.80375400  | 2.84725500 | 3.75980500  |
| H | -1.64984900 | -3.52329700 | -3.68609400 | H | 0.73822800  | 1.06747200 | 2.52456300  |
| H | -3.40072800 | -5.03382100 | -2.75201800 | H | 1.80889900  | 2.32079400 | 1.91045100  |
| H | 1.35397300  | -0.78890400 | 0.13709600  | C | -0.55512600 | 2.65337600 | 4.44808400  |
| P | -0.21459000 | 1.70362200  | -0.14214200 | H | -2.66811300 | 2.94825900 | 4.02696500  |
| C | -1.75796700 | 2.11375100  | -1.09070400 | H | -1.61897000 | 4.22024100 | 3.40411500  |

|                                              |              |             |             |   |             |             |             |
|----------------------------------------------|--------------|-------------|-------------|---|-------------|-------------|-------------|
| H                                            | 1.61341600   | 2.45940500  | 4.39012000  | H | 2.44419900  | 6.58336000  | 0.37452700  |
| H                                            | 0.99456400   | 3.92144700  | 3.62612500  | H | 1.46713100  | 4.49187000  | -3.26177200 |
| H                                            | -0.57583400  | 3.18475900  | 5.40715900  | H | 2.51922900  | 6.44037500  | -2.11512500 |
| H                                            | -0.69774900  | 1.58712500  | 4.67376500  | H | -0.88812700 | 0.72879400  | 0.14155700  |
|                                              |              |             |             | P | 1.14413000  | -1.35413900 | -0.11191800 |
|                                              |              |             |             | C | 2.82238200  | -1.48311300 | -0.89366300 |
| <b>dist-5<sup>B</sup>-toluene</b>            |              |             |             | C | 3.34784900  | -2.90520900 | -1.15478200 |
| Sum of electronic and thermal Free Energies= | -3541.191504 |             |             | C | 2.87985700  | -0.61765400 | -2.17067600 |
| Ni                                           | 0.75676500   | 0.83374100  | 0.36495500  | H | 3.46620600  | -0.98391400 | -0.16173100 |
| C                                            | -1.13918200  | 1.83913600  | 0.46875800  | C | 4.78038400  | -2.85922700 | -1.71580900 |
| H                                            | -1.70502600  | 1.64939600  | 1.38370000  | H | 2.70108400  | -3.41300300 | -1.88266300 |
| C                                            | 0.10487900   | 2.59725200  | 0.80348600  | H | 3.32463600  | -3.50392600 | -0.23608900 |
| H                                            | 0.17879000   | 2.82618600  | 1.86851400  | C | 4.30863000  | -0.58460900 | -2.73768600 |
| C                                            | -7.64007800  | -0.09337400 | -0.75640600 | H | 2.19969900  | -1.02174200 | -2.93454900 |
| C                                            | -6.26987500  | 0.07437500  | -0.98892800 | H | 2.54754300  | 0.39716300  | -1.93118300 |
| C                                            | -5.38359700  | 0.32835000  | 0.06976800  | C | 4.85442500  | -1.99928300 | -2.98747900 |
| C                                            | -5.90488500  | 0.41032600  | 1.37142300  | H | 5.13321100  | -3.87760700 | -1.92144400 |
| C                                            | -7.27317400  | 0.24317300  | 1.61080000  | H | 5.45009300  | -2.43812500 | -0.95348300 |
| C                                            | -8.14716600  | -0.00895500 | 0.54575700  | H | 4.32630100  | -0.00020700 | -3.66579600 |
| H                                            | -8.30993600  | -0.29403100 | -1.58940600 | H | 4.95737100  | -0.06234600 | -2.02268300 |
| H                                            | -5.88299000  | 0.00216500  | -2.00409800 | H | 5.88832100  | -1.94963300 | -3.35049700 |
| H                                            | -5.23177100  | 0.60251700  | 2.20563300  | H | 4.26421800  | -2.48096100 | -3.78081200 |
| H                                            | -7.65707200  | 0.30571500  | 2.62645100  | C | 0.00882000  | -2.36767400 | -1.21581800 |
| H                                            | -9.21051300  | -0.14211700 | 0.72947700  | C | -0.09590600 | -3.87083700 | -0.88000600 |
| C                                            | -3.90977700  | 0.54953200  | -0.18960500 | C | -1.39379400 | -1.73754300 | -1.32214800 |
| C                                            | -3.56120400  | 2.04257800  | -0.33859500 | H | 0.47587400  | -2.28174700 | -2.20682000 |
| H                                            | -3.60696600  | 0.02913400  | -1.10123600 | C | -0.96499400 | -4.60880300 | -1.91334600 |
| H                                            | -3.32560100  | 0.11370500  | 0.62886200  | H | -0.55111500 | -3.99591100 | 0.11043200  |
| C                                            | -2.08396700  | 2.31399300  | -0.65792000 | H | 0.89491200  | -4.33236600 | -0.83114400 |
| H                                            | -4.17353900  | 2.47356200  | -1.14147400 | C | -2.27603600 | -2.48563400 | -2.33453100 |
| H                                            | -3.83062600  | 2.58540400  | 0.57606100  | H | -1.88032600 | -1.75915100 | -0.33754000 |
| H                                            | -1.94352200  | 3.39665200  | -0.77014600 | H | -1.31119800 | -0.68642200 | -1.60859300 |
| O                                            | -1.68903000  | 1.65799900  | -1.87758000 | C | -2.36459400 | -3.98506900 | -2.01639900 |
| B                                            | 3.23303300   | 1.66132500  | 1.62024400  | H | -1.03797500 | -5.66936200 | -1.64307900 |
| O                                            | 2.66356400   | 1.90188300  | 2.89105000  | H | -0.47332700 | -4.56626400 | -2.89545700 |
| H                                            | 1.72543600   | 1.66563100  | 2.84340000  | H | -3.27876000 | -2.04063400 | -2.35328700 |
| O                                            | 2.57625700   | 1.16876100  | 0.56820900  | H | -1.85398700 | -2.35291600 | -3.34081800 |
| H                                            | -2.14296300  | 2.09816100  | -2.61440800 | H | -2.95785100 | -4.50343500 | -2.77934600 |
| C                                            | 0.71532600   | 3.65339900  | -0.02922000 | H | -2.89067200 | -4.12078500 | -1.06079300 |
| C                                            | 1.33168100   | 4.75284700  | 0.60216100  | C | 1.23743000  | -2.26576800 | 1.51621200  |
| C                                            | 0.78365300   | 3.57917100  | -1.43716100 | C | 2.44769100  | -1.81174200 | 2.35813300  |
| C                                            | 1.97351800   | 5.74790100  | -0.13886700 | C | -0.07542700 | -2.03067300 | 2.29695800  |
| H                                            | 1.31594400   | 4.81944900  | 1.68814600  | H | 1.34129100  | -3.33932500 | 1.31784100  |
| C                                            | 1.42051200   | 4.57565100  | -2.17792300 | C | 2.46475600  | -2.50154700 | 3.73181700  |
| H                                            | 0.35331900   | 2.71965400  | -1.94078000 | H | 2.40727600  | -0.72604300 | 2.49410100  |
| C                                            | 2.01715200   | 5.66899900  | -1.53609100 | H | 3.38307500  | -2.02416100 | 1.83097100  |

|   |             |             |            |   |            |             |             |
|---|-------------|-------------|------------|---|------------|-------------|-------------|
| C | -0.05496400 | -2.71831400 | 3.67092800 | C | 3.95542700 | 2.25524300  | 3.44389900  |
| H | -0.20730600 | -0.94680500 | 2.43411400 | H | 4.40373700 | 1.99899300  | 1.35423500  |
| H | -0.93967200 | -2.37775200 | 1.71943900 | C | 1.63863100 | 1.95303100  | 4.08374600  |
| C | 1.15617600  | -2.26729800 | 4.50006700 | H | 0.28609100 | 1.43212300  | 2.48180800  |
| H | 3.31869600  | -2.13414400 | 4.31311100 | C | 2.96480800 | 2.23807800  | 4.43405700  |
| H | 2.61536100  | -3.58204100 | 3.59520500 | H | 4.98741600 | 2.47239300  | 3.70926400  |
| H | -0.98865500 | -2.50524400 | 4.20588600 | H | 0.86430400 | 1.92812200  | 4.84678900  |
| H | -0.01403700 | -3.80738900 | 3.52863100 | H | 3.22544200 | 2.43909500  | 5.47033700  |
| H | 1.17734500  | -2.79386000 | 5.46181100 | C | 3.28382700 | 0.64416700  | -0.76506500 |
| H | 1.05991100  | -1.19613800 | 4.72743800 | C | 3.69502700 | 1.05345500  | -2.04532400 |
| O | 4.60195700  | 1.93681900  | 1.52949200 | C | 3.95788100 | -0.43281100 | -0.15716400 |
| H | 4.91953500  | 2.27151600  | 2.38110300 | C | 4.74747900 | 0.40251400  | -2.70243200 |

### COD

Sum of electronic and thermal Free Energies= -311.929253

|   |             |             |             |   |             |             |             |
|---|-------------|-------------|-------------|---|-------------|-------------|-------------|
| C | 1.74200400  | 0.67127000  | -0.11956100 | H | 5.04631600  | 0.73219700  | -3.69496800 |
| C | 1.74175500  | -0.67186700 | -0.11956200 | H | 5.51622300  | -1.90537100 | -0.31685300 |
| H | 2.58725800  | 1.17387300  | -0.59071000 | H | 6.22569400  | -1.17215100 | -2.59865900 |
| C | 0.65433900  | 1.57217100  | 0.42936100  | C | 1.60149000  | 2.96147400  | -0.78817600 |
| H | 1.04380900  | 2.59366800  | 0.48406900  | C | 2.33025500  | 4.10199600  | -0.41560400 |
| H | 0.40115600  | 1.27973600  | 1.45582000  | C | 0.69329900  | 3.05511400  | -1.85539000 |
| C | 0.65377900  | -1.57237600 | 0.42937300  | C | 2.15338700  | 5.31075900  | -1.09983000 |
| H | 1.04289600  | -2.59400400 | 0.48412200  | H | 3.03294000  | 4.05622700  | 0.41208700  |
| H | 0.40067000  | -1.27981900 | 1.45581500  | C | 0.52841700  | 4.25448700  | -2.55323000 |
| H | 2.58682200  | -1.17478200 | -0.59071800 | H | 0.09987000  | 2.18252800  | -2.11968400 |
| C | -0.65407100 | -1.57284700 | -0.42848800 | C | 1.25708800  | 5.38843400  | -2.17391100 |
| H | -0.40088700 | -1.28201000 | -1.45542500 | H | 2.71584100  | 6.19045900  | -0.79527900 |
| H | -1.04348200 | -2.59444400 | -0.48166700 | H | -0.18357100 | 4.31050300  | -3.37292300 |
| C | -0.65351300 | 1.57305500  | -0.42849200 | H | 1.11981900  | 6.32857400  | -2.70276000 |
| H | -1.04257500 | 2.59478400  | -0.48170300 | C | -3.05173100 | 0.57108700  | 1.50035400  |
| H | -0.40041800 | 1.28209800  | -1.45541600 | C | -2.66418200 | -0.48714800 | 2.33976000  |
| C | -1.74214900 | -0.67127900 | 0.11865500  | C | -4.19068400 | 1.32269900  | 1.83775200  |
| C | -1.74190100 | 0.67187300  | 0.11866500  | C | -3.40919700 | -0.80557200 | 3.47955000  |
| H | -2.58857000 | -1.17357400 | 0.58804200  | H | -1.77639100 | -1.05968500 | 2.08988000  |
| H | -2.58813700 | 1.17447400  | 0.58806300  | C | -4.93363300 | 1.01085500  | 2.98203100  |

### IMI-PPh<sub>3</sub>

Sum of electronic and thermal Free Energies= -4616.585383

|    |             |            |             |   |             |             |             |
|----|-------------|------------|-------------|---|-------------|-------------|-------------|
| Ni | -0.02236300 | 0.07834300 | 0.03519900  | H | -5.81353300 | 1.59942400  | 3.23124200  |
| P  | -2.01790100 | 0.88259400 | -0.00139800 | H | -5.12703500 | -0.29872000 | 4.69153200  |
| P  | 1.74663000  | 1.30834400 | 0.03011000  | C | -2.33040800 | 2.68477800  | -0.28257700 |
| C  | 2.29675000  | 1.70345400 | 1.74868000  | C | -3.19529300 | 3.19544600  | -1.26207400 |
| C  | 3.62304700  | 1.99158600 | 2.11026600  | C | -1.60891700 | 3.58689300  | 0.51987200  |
| C  | 1.31059400  | 1.68349200 | 2.75179000  | C | -3.33985200 | 4.57958100  | -1.43251300 |
|    |             |            |             | H | -3.75850400 | 2.51805100  | -1.89848000 |



|   |             |             |             |                                              |              |             |             |
|---|-------------|-------------|-------------|----------------------------------------------|--------------|-------------|-------------|
| C | -1.76529100 | 4.96490200  | 0.36548900  | H                                            | 1.45915300   | -0.81794500 | -2.25714500 |
| H | -0.90506800 | 3.20573500  | 1.25633400  | C                                            | 1.54032700   | -3.62992100 | -4.18360900 |
| C | -2.63051300 | 5.46759400  | -0.61695100 | H                                            | 0.77791500   | -5.55949800 | -3.57575900 |
| H | -4.00901700 | 4.96062600  | -2.20072300 | H                                            | 2.20146000   | -1.59394100 | -4.49603400 |
| H | -1.19624800 | 5.64717400  | 0.99255600  | H                                            | 1.85582200   | -3.97318400 | -5.16598700 |
| H | -2.74140900 | 6.54099100  | -0.75058200 |                                              |              |             |             |
| C | -2.96553700 | 0.08151900  | -1.37184200 |                                              |              |             |             |
| C | -4.30534300 | -0.32529100 | -1.28786900 | <b>1-PPh<sub>3</sub></b>                     |              |             |             |
| C | -2.23606000 | -0.22248200 | -2.53721100 | Sum of electronic and thermal Free Energies= | -3890.022877 |             |             |
| C | -4.90181300 | -1.02868000 | -2.34266500 | Ni                                           | 0.06848200   | -0.66819200 | -0.89260300 |
| H | -4.88383500 | -0.11851800 | -0.39192300 | C                                            | 2.37487000   | -2.46591600 | -1.31542800 |
| C | -2.83236800 | -0.91046500 | -3.59621600 | C                                            | 3.65997700   | -2.56335100 | -1.88388900 |
| H | -1.18271100 | 0.04647800  | -2.59179500 | C                                            | 2.19338600   | -3.00506500 | -0.02271300 |
| C | -4.16952800 | -1.32256400 | -3.49858800 | C                                            | 4.71770900   | -3.16846600 | -1.19687900 |
| H | -5.93610600 | -1.35342300 | -2.25619900 | H                                            | 3.83619800   | -2.13993500 | -2.87057600 |
| H | -2.25014700 | -1.14672400 | -4.48366200 | C                                            | 3.24679700   | -3.60500400 | 0.66901600  |
| H | -4.63182600 | -1.87567500 | -4.31250200 | H                                            | 1.22488100   | -2.90883800 | 0.45978100  |
| P | 0.23321200  | -2.06751800 | 0.00703400  | C                                            | 4.52088900   | -3.69176000 | 0.08653700  |
| C | 1.58898000  | -2.60357700 | 1.14255800  | H                                            | 5.70105100   | -3.21742300 | -1.65955400 |
| C | 2.54499400  | -3.58517100 | 0.84321100  | H                                            | 3.07961500   | -3.99168100 | 1.67213200  |
| C | 1.70662600  | -1.88562900 | 2.34703900  | H                                            | 5.34441700   | -4.15088000 | 0.62811000  |
| C | 3.60627600  | -3.83240400 | 1.72383700  | P                                            | 1.37656500   | 0.87373700  | -0.04132100 |
| H | 2.48473400  | -4.14134500 | -0.08801700 | P                                            | -2.00192500  | -0.47307100 | -0.20098600 |
| C | 2.75373600  | -2.14135200 | 3.23491100  | C                                            | 1.28187400   | -1.79070200 | -2.05404300 |
| H | 0.99308200  | -1.09494000 | 2.56621800  | C                                            | -0.06393500  | -2.25457100 | -2.06908800 |
| C | 3.71485400  | -3.11280400 | 2.91980600  | H                                            | -0.68387000  | -2.04954400 | -2.94188800 |
| H | 4.35324000  | -4.58088000 | 1.46968100  | H                                            | -0.31854700  | -3.18742800 | -1.56387500 |
| H | 2.83549200  | -1.56549300 | 4.15369600  | H                                            | 1.62407100   | -1.20639300 | -2.91113000 |
| H | 4.54518800  | -3.30010500 | 3.59627000  | C                                            | -3.22319500  | -0.86227400 | -1.52698100 |
| C | -1.16132400 | -3.18471600 | 0.49517300  | C                                            | -4.41816300  | -1.56607300 | -1.31401200 |
| C | -2.31538100 | -3.19299700 | -0.31261200 | C                                            | -2.92913500  | -0.39279000 | -2.81916400 |
| C | -1.18348500 | -3.89919000 | 1.70418800  | C                                            | -5.30485100  | -1.79304200 | -2.37436300 |
| C | -3.45555100 | -3.89761400 | 0.07694100  | H                                            | -4.66363100  | -1.94009500 | -0.32382000 |
| H | -2.32844400 | -2.63955200 | -1.24695500 | C                                            | -3.82052500  | -0.60341100 | -3.87478200 |
| C | -2.33154400 | -4.59878800 | 2.10080300  | H                                            | -1.99109800  | 0.13031900  | -2.99488500 |
| H | -0.30801300 | -3.91041400 | 2.34744000  | C                                            | -5.01207500  | -1.30792900 | -3.65459500 |
| C | -3.47194800 | -4.60025900 | 1.29080800  | H                                            | -6.22497500  | -2.34510300 | -2.19812800 |
| H | -4.33577300 | -3.88589400 | -0.56155600 | H                                            | -3.58205200  | -0.22934000 | -4.86749100 |
| H | -2.33102800 | -5.14159100 | 3.04338100  | H                                            | -5.70327100  | -1.48200400 | -4.47555000 |
| H | -4.36386800 | -5.13967300 | 1.60031100  | C                                            | -2.43618100  | -1.64526000 | 1.16362700  |
| C | 0.71991900  | -2.74497000 | -1.63904400 | C                                            | -3.42138500  | -1.37592500 | 2.12908300  |
| C | 0.52729500  | -4.08253000 | -2.02445800 | C                                            | -1.72923600  | -2.85744800 | 1.23965900  |
| C | 1.31975800  | -1.85557700 | -2.54694000 | C                                            | -3.69089000  | -2.29920100 | 3.14563400  |
| C | 0.93332200  | -4.52197800 | -3.28933800 | H                                            | -3.97826100  | -0.44395700 | 2.09495500  |
| H | 0.05523800  | -4.78298800 | -1.34026000 | C                                            | -1.99878200  | -3.78288600 | 2.25245900  |
| C | 1.73359000  | -2.29441500 | -3.80832500 | H                                            | -0.96236800  | -3.06937400 | 0.50236000  |

|   |             |             |             |                                              |              |             |             |
|---|-------------|-------------|-------------|----------------------------------------------|--------------|-------------|-------------|
| C | -2.98072200 | -3.50447500 | 3.21143000  | H                                            | 0.62628400   | -1.35008900 | 4.31457900  |
| H | -4.45490800 | -2.07573700 | 3.88633400  | H                                            | 2.41648700   | -0.10709400 | 5.53219800  |
| H | -1.43846100 | -4.71360600 | 2.29616600  |                                              |              |             |             |
| H | -3.18844800 | -4.21823800 | 4.00476100  |                                              |              |             |             |
| C | -2.67043200 | 1.11802400  | 0.46907300  | <b>H-TS1-PPh<sub>3</sub></b>                 |              |             |             |
| C | -3.79683500 | 1.76700900  | -0.05948000 | Sum of electronic and thermal Free Energies= | -3277.964795 |             |             |
| C | -2.00248900 | 1.70618900  | 1.55792100  | Ni                                           | 0.50054200   | -0.14944300 | -1.84925500 |
| C | -4.24872200 | 2.97363200  | 0.49182200  | C                                            | -1.15864300  | 0.74585800  | -2.02443500 |
| H | -4.33237600 | 1.33759700  | -0.90072300 | O                                            | -1.31048400  | 1.84905300  | -2.55041000 |
| C | -2.45643300 | 2.90263000  | 2.11451900  | C                                            | 2.14435900   | -2.49345800 | -1.17546800 |
| H | -1.12259400 | 1.22914900  | 1.97885400  | C                                            | 1.17809600   | -3.51982100 | -1.26324200 |
| C | -3.58361700 | 3.54334400  | 1.58214500  | C                                            | 1.14753400   | -4.56099400 | -0.33174400 |
| H | -5.12214400 | 3.46370700  | 0.06798800  | C                                            | 2.07892100   | -4.60796300 | 0.71411100  |
| H | -1.92253200 | 3.34195900  | 2.95349200  | C                                            | 3.04761000   | -3.59992700 | 0.80997900  |
| H | -3.93384400 | 4.47985600  | 2.00930200  | C                                            | 3.08050400   | -2.56047600 | -0.12182800 |
| C | 3.06763000  | 1.12204200  | -0.75154500 | H                                            | 0.42851500   | -3.49452200 | -2.04968600 |
| C | 4.11321500  | 0.25587400  | -0.38682400 | H                                            | 0.38667700   | -5.33370900 | -0.41612500 |
| C | 3.31446600  | 2.10252500  | -1.72892100 | H                                            | 2.04751100   | -5.41358700 | 1.44323500  |
| C | 5.37958400  | 0.38462400  | -0.96413500 | H                                            | 3.77563500   | -3.62010200 | 1.61785700  |
| H | 3.94394400  | -0.52741400 | 0.34652000  | H                                            | 3.82880800   | -1.77719500 | -0.02685700 |
| C | 4.58007200  | 2.22490000  | -2.31377100 | C                                            | -2.35045900  | 0.01027800  | -1.40494500 |
| H | 2.52418600  | 2.78395400  | -2.03157200 | H                                            | -2.51143500  | -0.89059700 | -2.01228400 |
| C | 5.62034000  | 1.36952700  | -1.92917200 | H                                            | -2.03929500  | -0.36337900 | -0.42168500 |
| H | 6.17216900  | -0.29802600 | -0.66825200 | C                                            | -3.64266000  | 0.83917800  | -1.29276100 |
| H | 4.75328100  | 2.99320500  | -3.06380700 | H                                            | -3.41135600  | 1.77829600  | -0.78069200 |
| H | 6.60538200  | 1.46776800  | -2.37905400 | H                                            | -3.98496200  | 1.10522900  | -2.29756000 |
| C | 0.68168500  | 2.58091300  | -0.16739000 | C                                            | -4.71851000  | 0.08427200  | -0.54572600 |
| C | 1.00720100  | 3.64705300  | 0.68489400  | C                                            | -5.64374700  | -0.72482100 | -1.22659900 |
| C | -0.21174900 | 2.80770900  | -1.22736600 | C                                            | -4.78256200  | 0.13195500  | 0.85812100  |
| C | 0.45193600  | 4.91405300  | 0.47815700  | C                                            | -6.60609200  | -1.46456300 | -0.52813100 |
| H | 1.68218200  | 3.49817100  | 1.52163100  | H                                            | -5.61087400  | -0.77400100 | -2.31359800 |
| C | -0.75561800 | 4.07677200  | -1.44665200 | C                                            | -5.74145500  | -0.60542000 | 1.56220600  |
| H | -0.48774000 | 1.97725900  | -1.87445000 | H                                            | -4.07668100  | 0.75470100  | 1.40513300  |
| C | -0.42596300 | 5.13439500  | -0.59098100 | C                                            | -6.65835100  | -1.40864000 | 0.87080900  |
| H | 0.70359400  | 5.72883600  | 1.15287400  | H                                            | -7.31578600  | -2.08148900 | -1.07467400 |
| H | -1.44750400 | 4.23389400  | -2.27048300 | H                                            | -5.77575700  | -0.55130600 | 2.64795400  |
| H | -0.85662700 | 6.12014300  | -0.74907600 | H                                            | -7.40602300  | -1.98043700 | 1.41511000  |
| C | 1.75717200  | 0.60607300  | 1.74812100  | C                                            | 1.44425400   | -1.27677300 | -3.30932700 |
| C | 2.77904800  | 1.28376400  | 2.43777500  | H                                            | 1.80572900   | -0.61148500 | -4.09102300 |
| C | 0.99617100  | -0.34984500 | 2.44179300  | H                                            | 0.93255600   | -2.15640700 | -3.69161100 |
| C | 3.01098000  | 1.03194500  | 3.79307000  | H                                            | -0.06332000  | -0.53141800 | -3.17405000 |
| H | 3.41426100  | 1.99314400  | 1.91438100  | P                                            | 1.01385300   | 0.75242400  | 0.10390200  |
| C | 1.22655800  | -0.60518900 | 3.79781900  | C                                            | 2.18039300   | -1.34722100 | -2.10242300 |
| H | 0.22729100  | -0.90751000 | 1.91497300  | H                                            | 3.04821300   | -0.70059600 | -2.00958900 |
| C | 2.23196600  | 0.08994400  | 4.47902200  | C                                            | 0.24911700   | 2.40471800  | 0.42009300  |
| H | 3.80330700  | 1.56594600  | 4.31199900  | C                                            | 0.90444800   | 3.60580000  | 0.11034700  |

|   |             |             |             |   |             |             |             |
|---|-------------|-------------|-------------|---|-------------|-------------|-------------|
| C | -1.07914600 | 2.45635100  | 0.88005000  | C | -5.08066300 | -2.39052000 | -0.95065600 |
| C | 0.24632900  | 4.83282400  | 0.26082800  | C | -5.90018100 | -3.14032600 | -1.80940100 |
| H | 1.93133900  | 3.59996100  | -0.24152800 | C | -5.58588500 | -1.18462300 | -0.43100400 |
| C | -1.73502200 | 3.67951600  | 1.03116900  | C | -7.18978200 | -2.70242800 | -2.14032300 |
| H | -1.60612900 | 1.54111000  | 1.13321800  | H | -5.52703400 | -4.07610600 | -2.22187100 |
| C | -1.07483300 | 4.87487100  | 0.71915100  | C | -6.87231600 | -0.74232700 | -0.75729100 |
| H | 0.77031600  | 5.75463700  | 0.02056800  | H | -4.96490800 | -0.58967300 | 0.23619100  |
| H | -2.76103900 | 3.69705600  | 1.39054300  | C | -7.68118000 | -1.50065900 | -1.61549800 |
| H | -1.58400100 | 5.82820800  | 0.83548800  | H | -7.81000900 | -3.29970000 | -2.80489100 |
| C | 2.81891900  | 1.04864700  | 0.30255500  | H | -7.24541600 | 0.19073300  | -0.34075500 |
| C | 3.54508100  | 0.73600400  | 1.46117500  | H | -8.68229200 | -1.16018200 | -1.86898500 |
| C | 3.50107800  | 1.57339100  | -0.81101600 | H | -0.46275800 | -1.87657500 | -2.99264000 |
| C | 4.92743700  | 0.95485900  | 1.50810200  | H | 0.86846300  | -2.01956800 | -1.83815100 |
| H | 3.04902400  | 0.30300700  | 2.32364100  | H | -0.90430200 | 0.43160300  | -2.49296600 |
| C | 4.87733500  | 1.80673100  | -0.75815200 | C | 1.21534100  | 0.66588500  | -2.27195700 |
| H | 2.95454200  | 1.78128600  | -1.72920300 | C | 1.19643200  | 1.87279900  | -2.99960200 |
| C | 5.59567800  | 1.49500600  | 0.40383400  | C | 2.45960700  | 0.20376800  | -1.79107600 |
| H | 5.48026300  | 0.69763700  | 2.40811000  | C | 2.37082300  | 2.59227200  | -3.23525900 |
| H | 5.38869400  | 2.21595300  | -1.62563700 | H | 0.24876800  | 2.25976200  | -3.36535500 |
| H | 6.66892100  | 1.66281000  | 0.44359700  | C | 3.63367400  | 0.92083700  | -2.02337000 |
| C | 0.47187200  | -0.20905100 | 1.57003200  | H | 2.50357900  | -0.71851100 | -1.22095000 |
| C | -0.01170600 | -1.51165200 | 1.38297900  | C | 3.59575900  | 2.12149800  | -2.74799400 |
| C | 0.49760500  | 0.33496200  | 2.86816300  | H | 2.32590900  | 3.52595100  | -3.79067800 |
| C | -0.45015700 | -2.26904700 | 2.47442800  | H | 4.57678800  | 0.54627300  | -1.63645800 |
| H | -0.04312700 | -1.93870400 | 0.38666100  | H | 4.51041400  | 2.68167900  | -2.92686800 |
| C | 0.06168400  | -0.42180800 | 3.95779200  | O | -1.04161900 | -2.15151200 | 0.37686600  |
| H | 0.84382000  | 1.35260500  | 3.02840900  | B | 3.70116300  | -2.39037900 | 0.43690900  |
| C | -0.41246100 | -1.72729100 | 3.76300100  | C | 5.03880000  | -1.78635600 | -0.11979200 |
| H | -0.81740200 | -3.27898400 | 2.31275600  | C | 5.52975000  | -2.15780300 | -1.38705000 |
| H | 0.08708500  | 0.00698100  | 4.95637100  | C | 5.75345700  | -0.81214500 | 0.60440200  |
| H | -0.75425100 | -2.31370600 | 4.61227600  | C | 6.68714500  | -1.57622400 | -1.91626000 |
|   |             |             |             | H | 4.98763800  | -2.89983600 | -1.96833800 |
|   |             |             |             | C | 6.91033500  | -0.22227200 | 0.08285000  |
|   |             |             |             | H | 5.38925600  | -0.50533500 | 1.58150700  |
|   |             |             |             | C | 7.37880100  | -0.60317300 | -1.18197400 |
|   |             |             |             | H | 7.04617400  | -1.87100200 | -2.89972200 |
|   |             |             |             | H | 7.44263900  | 0.53505300  | 0.65389800  |
|   |             |             |             | H | 8.27420400  | -0.14298500 | -1.59349200 |
|   |             |             |             | O | 2.98553600  | -3.26088100 | -0.35512300 |
|   |             |             |             | H | 2.15759800  | -3.52585300 | 0.11667900  |
|   |             |             |             | O | 3.26151600  | -1.99683200 | 1.68154000  |
|   |             |             |             | H | 2.38513300  | -2.40831700 | 1.87097800  |
|   |             |             |             | C | 0.45829100  | -4.55017100 | 2.12128700  |
|   |             |             |             | C | 1.66501600  | -5.31062300 | 2.65374800  |
|   |             |             |             | H | -0.13596900 | -5.19120700 | 1.45551100  |
|   |             |             |             | H | -0.19128000 | -4.23379500 | 2.94893700  |

**dist-TS1-PPh<sub>3</sub>**

Sum of electronic and thermal Free Energies= -3841.23614

|    |             |             |             |   |             |             |             |
|----|-------------|-------------|-------------|---|-------------|-------------|-------------|
| C  | -0.05731300 | -0.03155600 | -1.97761900 | H | 7.04617400  | -1.87100200 | -2.89972200 |
| C  | -0.11727200 | -1.57571300 | -1.99868400 | H | 7.44263900  | 0.53505300  | 0.65389800  |
| Ni | -0.46955300 | -0.37712200 | -0.19161000 | H | 8.27420400  | -0.14298500 | -1.59349200 |
| C  | -1.18479800 | -2.37165800 | -1.01804900 | O | 2.98553600  | -3.26088100 | -0.35512300 |
| H  | -0.92351800 | -3.41713700 | -1.24071700 | H | 2.15759800  | -3.52585300 | 0.11667900  |
| C  | -2.62697100 | -2.08753200 | -1.47632000 | O | 3.26151600  | -1.99683200 | 1.68154000  |
| H  | -2.74346300 | -2.36417100 | -2.53170200 | H | 2.38513300  | -2.40831700 | 1.87097800  |
| H  | -2.81964600 | -1.00940200 | -1.40850000 | C | 0.45829100  | -4.55017100 | 2.12128700  |
| C  | -3.66999100 | -2.82670800 | -0.62028200 | C | 1.66501600  | -5.31062300 | 2.65374800  |
| H  | -3.56087700 | -3.90800300 | -0.76684700 | H | -0.13596900 | -5.19120700 | 1.45551100  |
| H  | -3.44733200 | -2.61762500 | 0.43012200  | H | -0.19128000 | -4.23379500 | 2.94893700  |

|                                              |              |             |             |    |             |             |             |
|----------------------------------------------|--------------|-------------|-------------|----|-------------|-------------|-------------|
| H                                            | 1.34419800   | -6.19830600 | 3.20920400  | C  | 4.35908600  | -0.25479500 | 1.47668700  |
| H                                            | 2.31154100   | -5.63264100 | 1.83028200  | H  | 5.13717900  | -0.07157300 | 0.73056200  |
| H                                            | 2.25397300   | -4.67693700 | 3.32555700  | H  | 4.84568400  | -0.81371200 | 2.28492600  |
| O                                            | 0.91333200   | -3.39577000 | 1.39871100  | C  | 3.47907800  | -0.24410900 | -1.54757200 |
| H                                            | 0.10569200   | -2.88985900 | 0.99299300  | H  | 4.44497200  | -0.62767000 | -1.91091100 |
| P                                            | -0.65023200  | 1.52664200  | 0.70589200  | H  | 2.79848100  | -0.27585900 | -2.40563900 |
| C                                            | -2.24697100  | 1.62121900  | 1.61798000  | H  | 2.38135000  | -2.03394500 | -0.85205100 |
| C                                            | -2.83359500  | 0.41775300  | 2.04904000  | C  | 3.67004600  | 1.24648100  | -1.11617000 |
| C                                            | -2.88206500  | 2.84132600  | 1.90544000  | H  | 4.66434600  | 1.37859800  | -0.68126500 |
| C                                            | -4.03181600  | 0.43884400  | 2.77001400  | H  | 3.65050300  | 1.86506300  | -2.02014400 |
| H                                            | -2.36640300  | -0.53387900 | 1.80162300  | C  | 3.83906300  | 1.09167900  | 2.04939300  |
| C                                            | -4.08227800  | 2.85766500  | 2.62327800  | H  | 3.45713800  | 0.91606800  | 3.06206200  |
| H                                            | -2.45465600  | 3.77836400  | 1.55867600  | H  | 4.67923700  | 1.79598100  | 2.15954500  |
| C                                            | -4.65810100  | 1.65740800  | 3.05903300  | C  | 2.61424100  | 1.75798900  | -0.14294600 |
| H                                            | -4.48178800  | -0.49642600 | 3.09330100  | C  | 2.70911600  | 1.70528400  | 1.24055200  |
| H                                            | -4.56829100  | 3.80608800  | 2.83778700  | H  | 1.86235900  | 2.41897200  | -0.57284200 |
| H                                            | -5.59361200  | 1.67185700  | 3.61253500  | H  | 2.01257000  | 2.32357400  | 1.81076300  |
| C                                            | -0.66285500  | 2.99889500  | -0.38076300 | Ni | 1.55573100  | 0.06837700  | 0.50034100  |
| C                                            | -1.71992300  | 3.12655500  | -1.30052500 | P  | -0.56406600 | 0.00525200  | -0.05922100 |
| C                                            | 0.37878000   | 3.93607400  | -0.39514300 | C  | -1.20162100 | 1.56877700  | -0.89477900 |
| C                                            | -1.74149100  | 4.18835300  | -2.20619900 | C  | -1.63721300 | -0.18198100 | 1.48034500  |
| H                                            | -2.52702100  | 2.39730000  | -1.30914200 | C  | -1.11010600 | -1.35793700 | -1.22730200 |
| C                                            | 0.35706000   | 4.99827500  | -1.30711100 | C  | -2.62353000 | 1.57547100  | -1.48857600 |
| H                                            | 1.21359900   | 3.83998200  | 0.29275300  | C  | -1.01422700 | 2.79736100  | 0.02005900  |
| C                                            | -0.70083700  | 5.12858600  | -2.21137300 | H  | -0.49344900 | 1.68820200  | -1.72786900 |
| H                                            | -2.56424600  | 4.27972100  | -2.91071800 | C  | -3.04215200 | -0.79110800 | 1.29610800  |
| H                                            | 1.17277400   | 5.71656700  | -1.31323000 | C  | -0.86224400 | -0.91652600 | 2.59873800  |
| H                                            | -0.71447900  | 5.95213200  | -2.92075300 | H  | -1.77171000 | 0.85212300  | 1.82352300  |
| C                                            | 0.65268800   | 1.82660500  | 1.96064500  | C  | -0.44901100 | -1.15132400 | -2.60715700 |
| C                                            | 1.76768900   | 0.97369400  | 1.97193200  | C  | -0.72690900 | -2.73929200 | -0.65551300 |
| C                                            | 0.56167100   | 2.86143900  | 2.90797900  | H  | -2.20016700 | -1.32398900 | -1.35162300 |
| C                                            | 2.78329800   | 1.15252000  | 2.91682000  | C  | -2.88055700 | 2.87668900  | -2.27166500 |
| H                                            | 1.84460000   | 0.16327800  | 1.25273700  | H  | -3.35880500 | 1.49767300  | -0.67809900 |
| C                                            | 1.58112500   | 3.04317600  | 3.84626900  | H  | -2.78331000 | 0.71438100  | -2.14567800 |
| H                                            | -0.29974600  | 3.52380200  | 2.92022500  | C  | -1.25311200 | 4.10351100  | -0.75522100 |
| C                                            | 2.69337500   | 2.18878700  | 3.85231600  | H  | -1.73112400 | 2.74909200  | 0.85050500  |
| H                                            | 3.62855500   | 0.47096100  | 2.91982000  | H  | -0.01540100 | 2.78807100  | 0.46839500  |
| H                                            | 1.50579000   | 3.84596200  | 4.57536100  | C  | -3.82514900 | -0.79241700 | 2.62135500  |
| H                                            | 3.48099500   | 2.32911200  | 4.58850600  | H  | -2.95772100 | -1.82408500 | 0.93892400  |
|                                              |              |             |             | H  | -3.60430400 | -0.24365900 | 0.53411300  |
|                                              |              |             |             | C  | -1.65265200 | -0.92969100 | 3.91766200  |
| <b>IMI</b>                                   |              |             |             | H  | -0.65377300 | -1.94869900 | 2.29041400  |
| Sum of electronic and thermal Free Energies= | -2866.894916 |             |             | H  | 0.11286900  | -0.43356500 | 2.75056900  |
| C                                            | 3.24431000   | -1.10204900 | 0.87471300  | C  | -0.77692700 | -2.29463300 | -3.58132500 |
| C                                            | 2.90312400   | -1.15489000 | -0.47605800 | H  | 0.63848100  | -1.09192100 | -2.46847000 |
| H                                            | 2.87697700   | -1.91568800 | 1.50625600  | H  | -0.76186400 | -0.19832600 | -3.04735500 |

|   |             |             |             |    |            |             |             |
|---|-------------|-------------|-------------|----|------------|-------------|-------------|
| C | -1.05659800 | -3.87943700 | -1.63289200 | H  | 3.36618700 | 5.47157300  | -0.48677800 |
| H | 0.34755500  | -2.74268400 | -0.43412400 | H  | 1.98489300 | 5.89908200  | -2.31337700 |
| H | -1.23736800 | -2.91715300 | 0.29598300  | Ni | 0.27701400 | 0.74129100  | -0.33077000 |
| C | -2.64944200 | 4.11998600  | -1.39808100 | P  | 1.87256200 | -0.81778000 | -0.00219100 |
| H | -3.90317000 | 2.87762200  | -2.66938800 | C  | 3.59967600 | -0.19719300 | -0.48055500 |
| H | -2.20433100 | 2.91041100  | -3.13764600 | C  | 1.81482700 | -2.34873600 | -1.12114900 |
| H | -1.13346200 | 4.96438400  | -0.08564500 | C  | 2.18044700 | -1.40396600 | 1.76646200  |
| H | -0.48829800 | 4.20187800  | -1.53844600 | C  | 4.80721000 | -1.05173900 | -0.03988800 |
| C | -3.05476600 | -1.52856300 | 3.72799800  | C  | 3.70856200 | 0.08859800  | -1.99570700 |
| H | -4.80920400 | -1.25349900 | 2.47020700  | H  | 3.67823300 | 0.76826900  | 0.03117100  |
| H | -4.00613200 | 0.24555500  | 2.93466800  | C  | 1.31020600 | -3.66245600 | -0.50292300 |
| H | -1.09768800 | -1.49029800 | 4.68014300  | C  | 1.00297400 | -2.00212900 | -2.38830800 |
| H | -1.74796700 | 0.10078500  | 4.28843600  | H  | 2.85072600 | -2.53562600 | -1.42904000 |
| C | -0.38822100 | -3.66033500 | -2.99754500 | C  | 2.62759200 | -0.18647900 | 2.60924300  |
| H | -0.26298200 | -2.12606800 | -4.53596400 | C  | 0.92845400 | -2.02763000 | 2.41283600  |
| H | -1.85493200 | -2.28701600 | -3.79626800 | H  | 2.98133400 | -2.15439400 | 1.76526500  |
| H | -0.74145000 | -4.83805700 | -1.20208200 | C  | 6.13419300 | -0.34527300 | -0.37887900 |
| H | -2.14595500 | -3.93643600 | -1.76900700 | H  | 4.77907200 | -2.02824000 | -0.54199100 |
| H | -2.78533200 | 5.03223000  | -1.99208600 | H  | 4.78202100 | -1.25272900 | 1.03475200  |
| H | -3.40801500 | 4.14454800  | -0.60274400 | C  | 5.01458900 | 0.82859100  | -2.32570000 |
| H | -3.61467500 | -1.49255600 | 4.67067500  | H  | 3.69966400 | -0.85675300 | -2.55219000 |
| H | -2.96016400 | -2.58944900 | 3.45559400  | H  | 2.84510500 | 0.66315100  | -2.34393600 |
| H | -0.66178500 | -4.46468500 | -3.69156900 | C  | 1.34138000 | -4.81111300 | -1.52661700 |
| H | 0.70360300  | -3.70279800 | -2.87540300 | H  | 0.28397700 | -3.53402500 | -0.14886300 |

## IM2

Sum of electronic and thermal Free Energies= -3913.738665

|   |             |            |             |   |             |             |             |
|---|-------------|------------|-------------|---|-------------|-------------|-------------|
| C | 0.27103600  | 2.59651400 | -1.16188100 | H | 1.91900700  | -3.93362200 | 0.36630000  |
| C | 1.48327200  | 2.31890900 | -0.47419900 | C | 1.01815800  | -3.14919600 | -3.41110500 |
| H | 0.30725200  | 2.38142600 | -2.23900100 | H | -0.02524000 | -1.77083500 | -2.09038100 |
| C | -0.53402600 | 3.85667100 | -0.89029900 | H | 1.38420900  | -1.08726400 | -2.85149600 |
| H | -0.58247400 | 4.06664800 | 0.17899500  | C | 2.85208400  | -0.54572800 | 4.08649900  |
| H | -1.57041900 | 3.74665400 | -1.22348100 | H | 1.84963900  | 0.58421100  | 2.53970900  |
| C | 1.83046400  | 2.95335900 | 0.86781500  | H | 3.54089700  | 0.25950900  | 2.20523200  |
| H | 1.10028500  | 2.65382800 | 1.63008500  | C | 1.14280100  | -2.38549800 | 3.89247000  |
| H | 2.78943300  | 2.54226900 | 1.20039400  | H | 0.11095700  | -1.30724800 | 2.33450600  |
| H | 2.36039000  | 2.11080000 | -1.08138400 | H | 0.61159700  | -2.92297300 | 1.87744200  |
| C | 1.91621700  | 4.52002000 | 0.90466300  | C | 6.23507600  | 0.01560900  | -1.86821900 |
| H | 0.94776300  | 4.91919900 | 1.21824700  | H | 6.97830900  | -0.98114200 | -0.08356500 |
| H | 2.62601400  | 4.80904100 | 1.68890300  | H | 6.20677000  | 0.57350200  | 0.22025700  |
| C | 0.05222200  | 5.08242400 | -1.63902600 | H | 5.07063300  | 1.02573600  | -3.40357000 |
| H | -0.11345000 | 4.92753100 | -2.71393800 | H | 5.01344800  | 1.80628100  | -1.82330000 |
| H | -0.54248700 | 5.97478600 | -1.38410100 | C | 0.54003300  | -4.47099200 | -2.79182600 |
| C | 2.32021900  | 5.17417100 | -0.39611400 | H | 0.95126200  | -5.72660200 | -1.06422700 |
| C | 1.52454200  | 5.40490000 | -1.45547100 | H | 2.38520900  | -5.01626200 | -1.80351400 |
|   |             |            |             | H | 0.39487700  | -2.88557800 | -4.27481300 |
|   |             |            |             | H | 2.04286300  | -3.27733800 | -3.78836400 |
|   |             |            |             | C | 1.59570800  | -1.16862700 | 4.70890500  |
|   |             |            |             | H | 3.15010600  | 0.35314300  | 4.64077700  |

|   |             |             |             |                                              |             |             |             |
|---|-------------|-------------|-------------|----------------------------------------------|-------------|-------------|-------------|
| H | 3.68663400  | -1.25709300 | 4.16379600  | H                                            | -6.52611900 | 0.05569100  | -2.05205400 |
| H | 0.21316700  | -2.79967800 | 4.30320000  | H                                            | -5.26169700 | -0.80231000 | -2.93083400 |
| H | 1.90236300  | -3.17655700 | 3.96847900  | H                                            | -3.54291400 | 2.37431000  | -4.15830300 |
| H | 7.16136800  | 0.57040200  | -2.06266600 | H                                            | -3.43372500 | 0.61568600  | -4.21503200 |
| H | 6.28962500  | -0.90936600 | -2.45989000 | C                                            | -2.50479400 | 2.99944000  | 3.56985400  |
| H | 0.62219000  | -5.28523100 | -3.52255700 | H                                            | -1.42260400 | 1.47015900  | 4.68020000  |
| H | -0.52317300 | -4.38741700 | -2.53334500 | H                                            | -3.06409500 | 1.01595900  | 4.22497400  |
| H | 1.78215300  | -1.45198400 | 5.75218400  | H                                            | -3.67866500 | 4.14242600  | 2.13881900  |
| H | 0.78990200  | -0.42073900 | 4.72028300  | H                                            | -4.43525900 | 2.63821400  | 2.66145100  |
| P | -1.84702300 | -0.00767100 | -0.05344700 | H                                            | -3.44969100 | -5.58686000 | 1.03300000  |
| C | -2.16195700 | -1.85023100 | 0.42370900  | H                                            | -4.51475300 | -4.32326600 | 0.41630100  |
| C | -3.08802100 | 0.21302300  | -1.45950800 | H                                            | -5.82243600 | 1.30226100  | -4.12321800 |
| C | -2.59392500 | 0.90069300  | 1.42731300  | H                                            | -5.51904000 | 2.24067400  | -2.66187900 |
| C | -3.16022200 | -2.14333400 | 1.56843400  | H                                            | -2.93212900 | 3.48454100  | 4.45616100  |
| C | -2.49833600 | -2.75856600 | -0.78293000 | H                                            | -1.58108000 | 3.54232900  | 3.32286200  |
| H | -1.17783100 | -2.16047600 | 0.78160400  |                                              |             |             |             |
| C | -4.58075700 | 0.09789600  | -1.08553300 |                                              |             |             |             |
| C | -2.83732900 | 1.46784500  | -2.31616200 |                                              |             |             |             |
| H | -2.84995300 | -0.63515800 | -2.11343300 |                                              |             |             |             |
| C | -1.62341300 | 0.81482800  | 2.62558200  |                                              |             |             |             |
| C | -2.90962100 | 2.37851400  | 1.14292400  |                                              |             |             |             |
| H | -3.53350000 | 0.40385300  | 1.69380100  |                                              |             |             |             |
| C | -3.15788400 | -3.63467000 | 1.95001200  |                                              |             |             |             |
| H | -4.17548500 | -1.85620000 | 1.26818200  |                                              |             |             |             |
| H | -2.92180600 | -1.56130300 | 2.46100300  |                                              |             |             |             |
| C | -2.51562000 | -4.25107100 | -0.40591700 |                                              |             |             |             |
| H | -3.48827600 | -2.50372100 | -1.17736800 |                                              |             |             |             |
| H | -1.78774800 | -2.59876300 | -1.59865900 |                                              |             |             |             |
| C | -5.46913700 | 0.10327400  | -2.34296100 |                                              |             |             |             |
| H | -4.86861300 | 0.93806200  | -0.44263600 |                                              |             |             |             |
| H | -4.77115400 | -0.81105100 | -0.50830500 |                                              |             |             |             |
| C | -3.72069300 | 1.46219300  | -3.57454000 |                                              |             |             |             |
| H | -3.05780000 | 2.36916100  | -1.73630600 |                                              |             |             |             |
| H | -1.77881700 | 1.52219600  | -2.58377600 |                                              |             |             |             |
| C | -2.16156400 | 1.53463700  | 3.87138600  |                                              |             |             |             |
| H | -0.66437600 | 1.25948900  | 2.32495200  |                                              |             |             |             |
| H | -1.40818600 | -0.22522000 | 2.88069300  |                                              |             |             |             |
| C | -3.47347600 | 3.09235800  | 2.38277300  |                                              |             |             |             |
| H | -1.99000400 | 2.87383800  | 0.83419700  |                                              |             |             |             |
| H | -3.61672000 | 2.47796000  | 0.31612900  |                                              |             |             |             |
| C | -3.48694300 | -4.52818000 | 0.74808100  |                                              |             |             |             |
| H | -3.87412600 | -3.80576500 | 2.76341300  |                                              |             |             |             |
| H | -2.16550900 | -3.90162300 | 2.34102300  |                                              |             |             |             |
| H | -2.78599900 | -4.84493400 | -1.28801800 |                                              |             |             |             |
| H | -1.50979000 | -4.57295800 | -0.10978900 |                                              |             |             |             |
| C | -5.20953600 | 1.34168400  | -3.21408000 |                                              |             |             |             |
|   |             |             |             | <b>IM3</b>                                   |             |             |             |
|   |             |             |             | Sum of electronic and thermal Free Energies= |             |             |             |
|   |             |             |             |                                              |             |             |             |
|   |             |             |             | C                                            | -1.41700000 | 0.47612400  | 1.61451100  |
|   |             |             |             | C                                            | -0.50739100 | 1.21673500  | 0.89396000  |
|   |             |             |             | H                                            | -1.03004600 | -0.09895100 | 2.45619300  |
|   |             |             |             | C                                            | -2.93129400 | 0.56314300  | 1.50681100  |
|   |             |             |             | H                                            | -3.22859200 | 1.58062000  | 1.24529100  |
|   |             |             |             | H                                            | -3.36798300 | 0.36096100  | 2.49022000  |
|   |             |             |             | C                                            | -0.79908900 | 2.20713800  | -0.21691200 |
|   |             |             |             | H                                            | -0.97651800 | 3.20988800  | 0.19796200  |
|   |             |             |             | H                                            | 0.11158400  | 2.28108700  | -0.82151100 |
|   |             |             |             | H                                            | 0.52778800  | 1.20078600  | 1.23306100  |
|   |             |             |             | C                                            | -1.97969100 | 1.81332600  | -1.14607400 |
|   |             |             |             | H                                            | -2.92947100 | 2.12324900  | -0.70549600 |
|   |             |             |             | H                                            | -1.87965600 | 2.37308600  | -2.08164700 |
|   |             |             |             | C                                            | -3.52939800 | -0.45000400 | 0.49234900  |
|   |             |             |             | H                                            | -3.60555000 | -1.42879000 | 0.97842100  |
|   |             |             |             | H                                            | -4.55753000 | -0.15160000 | 0.24122700  |
|   |             |             |             | C                                            | -2.01258100 | 0.32603300  | -1.46420900 |
|   |             |             |             | C                                            | -2.71076300 | -0.64108100 | -0.77019600 |
|   |             |             |             | H                                            | -1.59317400 | 0.03648300  | -2.42804500 |
|   |             |             |             | H                                            | -2.82591000 | -1.61280500 | -1.25051500 |
|   |             |             |             | Ni                                           | -0.71378000 | -0.66565300 | -0.08677100 |
|   |             |             |             | C                                            | 3.99626400  | 0.35413900  | 1.14206600  |
|   |             |             |             | C                                            | 2.93053400  | -0.54861400 | 1.21014300  |
|   |             |             |             | C                                            | 2.10347500  | -0.79877000 | 0.09334400  |
|   |             |             |             | C                                            | 2.39456200  | -0.09779400 | -1.10036200 |
|   |             |             |             | C                                            | 3.46032700  | 0.80228300  | -1.16996800 |
|   |             |             |             | C                                            | 4.27158600  | 1.03781800  | -0.05003300 |

|   |             |             |             |   |             |             |             |
|---|-------------|-------------|-------------|---|-------------|-------------|-------------|
| H | 4.61437100  | 0.52402400  | 2.02116900  | C | -1.74183500 | -0.61477500 | 0.42275900  |
| H | 2.72687200  | -1.06785700 | 2.14509300  | C | -1.26178500 | -1.39179800 | -0.81734600 |
| H | 1.76454900  | -0.24352200 | -1.97382700 | H | -1.67090200 | -1.26927000 | 1.29700100  |
| H | 3.65611800  | 1.32977600  | -2.10126800 | H | -1.05652100 | 0.22153800  | 0.60204400  |
| H | 5.09877700  | 1.74113500  | -0.10542600 | C | 0.17774900  | -1.87922000 | -0.72301800 |
| C | 0.95221700  | -1.71599600 | 0.22199500  | H | -1.92371200 | -2.25675300 | -0.97891100 |
| H | 0.90077500  | -2.24759600 | 1.17430800  | H | -1.35616900 | -0.76510900 | -1.71290000 |
| C | 0.18776800  | -2.22237800 | -0.86825000 | H | 0.53478200  | -2.38921300 | -1.63545100 |
| H | -0.37998600 | -3.14229800 | -0.72000600 | O | 0.68281900  | -2.28760000 | 0.43467600  |
| H | 0.50225500  | -2.06200000 | -1.90066600 |   |             |             |             |

#### IM4

Sum of electronic and thermal Free Energies= -2244.190722

|    |             |             |             |
|----|-------------|-------------|-------------|
| C  | 2.33018800  | 0.53500500  | -1.49754400 |
| C  | 1.26614700  | 1.20013900  | -0.90025500 |
| H  | 2.12004000  | -0.00158800 | -2.42324100 |
| C  | 3.80412700  | 0.75242300  | -1.17603800 |
| H  | 3.97337600  | 1.79572800  | -0.90059400 |
| H  | 4.39303300  | 0.57672600  | -2.08155600 |
| C  | 1.34274900  | 2.22278500  | 0.21940700  |
| H  | 1.53091600  | 3.22415500  | -0.19354600 |
| H  | 0.35366900  | 2.26756500  | 0.68780800  |
| H  | 0.30662900  | 1.16488600  | -1.41744100 |
| C  | 2.39930600  | 1.90996600  | 1.31471400  |
| H  | 3.37889100  | 2.28672800  | 1.01455000  |
| H  | 2.12549500  | 2.45536800  | 2.22330900  |
| C  | 4.33629600  | -0.19306400 | -0.06294200 |
| H  | 4.58578400  | -1.15890500 | -0.51370500 |
| H  | 5.27528900  | 0.21014100  | 0.34105500  |
| C  | 2.49456900  | 0.43030600  | 1.64011100  |
| C  | 3.35473200  | -0.46526000 | 1.06190800  |
| H  | 1.90839700  | 0.08192600  | 2.49058700  |
| H  | 3.42366400  | -1.45470300 | 1.51413200  |
| Ni | 1.48004900  | -0.64678100 | -0.03960300 |
| C  | -5.56691300 | -0.42828500 | 0.40429200  |
| C  | -4.25989900 | -0.89275600 | 0.59531700  |
| C  | -3.15246600 | -0.09471300 | 0.26136000  |
| C  | -3.38924600 | 1.18473300  | -0.26968200 |
| C  | -4.69387800 | 1.65573000  | -0.46207900 |
| C  | -5.78936800 | 0.84944400  | -0.12617900 |
| H  | -6.41055700 | -1.06026200 | 0.67237100  |
| H  | -4.09611800 | -1.88546000 | 1.01104100  |
| H  | -2.54367100 | 1.81864900  | -0.53161700 |
| H  | -4.85562800 | 2.65092200  | -0.87006100 |
| H  | -6.80346100 | 1.21362400  | -0.27210200 |

#### IM5

Sum of electronic and thermal Free Energies= -2244.158697

|    |             |             |             |
|----|-------------|-------------|-------------|
| C  | 2.90607400  | -0.36564000 | 1.43929600  |
| C  | 1.55451200  | -0.70658100 | 1.53568300  |
| H  | 3.28765100  | 0.35744400  | 2.16462900  |
| C  | 3.96142200  | -1.17914400 | 0.69755200  |
| H  | 3.67424400  | -2.23415500 | 0.67982400  |
| H  | 4.90958800  | -1.13400100 | 1.24512900  |
| C  | 0.90163500  | -1.87065600 | 0.80576500  |
| H  | 1.09244300  | -2.81819900 | 1.33138000  |
| H  | -0.18138900 | -1.71601800 | 0.84244400  |
| H  | 0.97116400  | -0.28427400 | 2.35623800  |
| C  | 1.33740100  | -2.03009400 | -0.68837700 |
| H  | 2.19346400  | -2.70739200 | -0.75196000 |
| H  | 0.52185000  | -2.51897600 | -1.23175900 |
| C  | 4.19775800  | -0.66478300 | -0.75036200 |
| H  | 4.92287300  | 0.15637900  | -0.71800100 |
| H  | 4.66299300  | -1.46053100 | -1.35225100 |
| C  | 1.67887100  | -0.71403100 | -1.37997600 |
| C  | 2.94273500  | -0.13475300 | -1.42347300 |
| H  | 0.93951800  | -0.34297400 | -2.09234900 |
| H  | 3.10868500  | 0.64588400  | -2.16871800 |
| Ni | 1.78775400  | 0.73136500  | 0.10506900  |
| C  | -4.62863000 | -1.21861800 | -1.17828500 |
| C  | -3.36219900 | -0.62406500 | -1.11539100 |
| C  | -2.93599600 | 0.04492400  | 0.04377000  |
| C  | -3.81003200 | 0.10367700  | 1.14223100  |
| C  | -5.07706600 | -0.48884400 | 1.08544000  |
| C  | -5.49181800 | -1.15239300 | -0.07705000 |
| H  | -4.93921900 | -1.73605800 | -2.08301300 |
| H  | -2.69498100 | -0.68415600 | -1.97343600 |
| H  | -3.49338300 | 0.61359300  | 2.05038700  |
| H  | -5.73803100 | -0.43679100 | 1.94750800  |
| H  | -6.47419600 | -1.61616200 | -0.12217200 |
| C  | -1.58094800 | 0.71380200  | 0.09587200  |

|   |             |            |             |   |             |             |             |
|---|-------------|------------|-------------|---|-------------|-------------|-------------|
| C | -1.64515800 | 2.19737100 | -0.30142000 | H | 1.70598800  | -0.45454100 | 0.62440200  |
| H | -0.88502600 | 0.19975400 | -0.57187200 | H | 2.71927400  | -1.88208900 | 0.67062500  |
| H | -1.15476800 | 0.63571100 | 1.10101700  | C | 1.07629100  | -2.04230200 | -1.57284400 |
| C | -0.31973700 | 2.90432100 | -0.23881600 | H | 2.19779200  | -0.23087600 | -1.86392400 |
| H | -2.04166000 | 2.30627500 | -1.32278500 | H | 3.16629000  | -1.68696800 | -1.76793100 |
| H | -2.35167900 | 2.74437800 | 0.33833200  | H | 0.89789500  | -2.27740400 | -2.63722300 |
| H | -0.32485600 | 3.99662100 | -0.37649500 | O | 0.66603800  | -2.89535100 | -0.68076400 |
| O | 0.77058100  | 2.33355800 | -0.04859400 | C | -1.35020400 | 1.16288500  | 3.05211600  |

**IM6**

Sum of electronic and thermal Free Energies= -2553.761673

|    |             |             |             |
|----|-------------|-------------|-------------|
| C  | -1.97408900 | -0.21869300 | -1.71476000 |
| C  | -0.67156700 | 0.24561200  | -1.89512100 |
| H  | -2.35936200 | -0.84939900 | -2.52339900 |
| C  | -3.07124700 | 0.44243300  | -0.90819300 |
| H  | -2.69541100 | 0.83191600  | 0.03350900  |
| H  | -3.82248200 | -0.30715500 | -0.63938100 |
| C  | 0.00748100  | 1.40823300  | -1.17126200 |
| H  | 0.52203500  | 1.04658500  | -0.27676200 |
| H  | 0.79304100  | 1.79026200  | -1.83223300 |
| H  | -0.19564800 | -0.02313100 | -2.83621900 |
| C  | -0.88227600 | 2.59952700  | -0.73366500 |
| H  | -1.47338000 | 2.31629300  | 0.13804500  |
| H  | -0.20727600 | 3.39172500  | -0.38874400 |
| C  | -3.79289800 | 1.54896500  | -1.70908200 |
| H  | -4.28570200 | 1.08431500  | -2.57400700 |
| H  | -4.61357900 | 1.94660800  | -1.09291400 |
| C  | -1.76269400 | 3.15337900  | -1.83206900 |
| C  | -2.96797100 | 2.70800100  | -2.22668700 |
| H  | -1.35261900 | 4.00462500  | -2.37730200 |
| H  | -3.44516200 | 3.25471400  | -3.04205200 |
| Ni | -0.70096400 | -1.52441500 | -0.79545800 |
| C  | 4.81101700  | 2.16850000  | 0.60177500  |
| C  | 3.68049600  | 1.35439900  | 0.46062900  |
| C  | 3.80168700  | -0.04278500 | 0.37098200  |
| C  | 5.08881600  | -0.60435100 | 0.42666400  |
| C  | 6.22316500  | 0.20420800  | 0.56645500  |
| C  | 6.08856500  | 1.59616500  | 0.65378500  |
| H  | 4.69489100  | 3.24754100  | 0.67336600  |
| H  | 2.69334500  | 1.81020100  | 0.42191300  |
| H  | 5.20239200  | -1.68514600 | 0.36264400  |
| H  | 7.21006200  | -0.25072100 | 0.61083600  |
| H  | 6.96772600  | 2.22618300  | 0.76508200  |
| C  | 2.58529300  | -0.91912400 | 0.16897100  |
| C  | 2.30009400  | -1.17572700 | -1.32071700 |

|   |             |             |             |
|---|-------------|-------------|-------------|
| H | 1.70598800  | -0.45454100 | 0.62440200  |
| H | 2.71927400  | -1.88208900 | 0.67062500  |
| C | 1.07629100  | -2.04230200 | -1.57284400 |
| H | 2.19779200  | -0.23087600 | -1.86392400 |
| H | 3.16629000  | -1.68696800 | -1.76793100 |
| H | 0.89789500  | -2.27740400 | -2.63722300 |
| O | 0.66603800  | -2.89535100 | -0.68076400 |
| C | -1.35020400 | 1.16288500  | 3.05211600  |
| C | -0.96307700 | 0.00564900  | 2.37334100  |
| C | -1.92061300 | -0.92357300 | 1.92299500  |
| C | -3.27555300 | -0.68764300 | 2.21832200  |
| C | -3.66479600 | 0.46451400  | 2.90766600  |
| C | -2.70619400 | 1.40010200  | 3.31779600  |
| H | -0.59796000 | 1.87977000  | 3.37169500  |
| H | 0.08843600  | -0.17341700 | 2.16368400  |
| H | -4.02686100 | -1.40754500 | 1.90525800  |
| H | -4.71682200 | 0.63366900  | 3.12389500  |
| H | -3.01072800 | 2.29995400  | 3.84623700  |
| C | -1.47590800 | -2.10312900 | 1.14861700  |
| H | -0.54994400 | -2.56515600 | 1.48882700  |
| C | -2.20291600 | -2.74384400 | 0.17239800  |
| H | -1.89429600 | -3.72038600 | -0.19145100 |
| H | -3.19865700 | -2.41241100 | -0.10621000 |

**IM7**

Sum of electronic and thermal Free Energies= -2553.761231

|   |             |            |             |
|---|-------------|------------|-------------|
| C | 1.48664700  | 0.94231200 | 0.24245000  |
| C | 0.49851800  | 1.09725100 | 1.21597600  |
| H | 2.48483600  | 0.67441200 | 0.59746800  |
| C | 1.48654400  | 1.66904700 | -1.08419800 |
| H | 0.46685600  | 1.80347000 | -1.45009900 |
| H | 2.00719900  | 1.07392000 | -1.83995300 |
| C | -0.75388400 | 1.95996100 | 1.07366200  |
| H | -1.50312000 | 1.46577800 | 0.45186400  |
| H | -1.20285200 | 2.05546600 | 2.06691500  |
| H | 0.80426300  | 0.92039000 | 2.24722900  |
| C | -0.55093300 | 3.38706900 | 0.47098900  |
| H | -0.63366000 | 3.32878800 | -0.61695600 |
| H | -1.39367800 | 4.00492600 | 0.80128000  |
| C | 2.23958000  | 3.02327900 | -0.98218300 |
| H | 3.31326200  | 2.80160200 | -0.94160200 |
| H | 2.09247300  | 3.58008700 | -1.91942100 |
| C | 0.74431800  | 4.07272200 | 0.83509100  |
| C | 1.91892900  | 3.91918400 | 0.20083000  |
| H | 0.71793100  | 4.74368500 | 1.69449900  |



|                                              |             |             |             |   |            |             |             |
|----------------------------------------------|-------------|-------------|-------------|---|------------|-------------|-------------|
| H                                            | 2.76465900  | 4.49762500  | 0.57509600  | C | 2.66096900 | 1.20121300  | -1.33108700 |
| Ni                                           | 0.51717700  | -0.82315000 | 0.41562700  | C | 4.37317000 | -1.70411200 | -0.56919000 |
| C                                            | -5.78911200 | 1.09418200  | -0.91499900 | C | 2.34169200 | -2.68486300 | 0.59599400  |
| C                                            | -4.46364800 | 0.69743300  | -0.69895600 | H | 2.37687100 | -1.83272600 | -1.35804500 |
| C                                            | -4.14917400 | -0.63637400 | -0.38829500 | C | 4.45509400 | 1.33240900  | 1.32410400  |
| C                                            | -5.19987700 | -1.56542600 | -0.29930100 | C | 2.23112400 | 1.40352400  | 2.53968200  |
| C                                            | -6.52716400 | -1.17505600 | -0.51354300 | H | 3.36074600 | -0.35498300 | 2.07383200  |
| C                                            | -6.82746400 | 0.15846400  | -0.82182500 | C | 2.21051700 | 0.63264500  | -2.69338100 |
| H                                            | -6.01077200 | 2.13075200  | -1.15846000 | C | 2.02841500 | 2.59214900  | -1.10030600 |
| H                                            | -3.66419400 | 1.43215500  | -0.77671900 | H | 3.75360200 | 1.30217700  | -1.33880500 |
| H                                            | -4.97511600 | -2.60407200 | -0.06313000 | C | 4.79039100 | -3.11429100 | -1.02431100 |
| H                                            | -7.32558500 | -1.91025700 | -0.44363300 | H | 4.86707800 | -1.48087200 | 0.38523800  |
| H                                            | -7.85724400 | 0.46349700  | -0.99137900 | H | 4.72425700 | -0.95832100 | -1.29209600 |
| C                                            | -2.72245100 | -1.05258300 | -0.10818400 | C | 2.76315400 | -4.09397600 | 0.14772700  |
| C                                            | -2.37789600 | -0.97432100 | 1.39112700  | H | 2.74890900 | -2.49173200 | 1.59826800  |
| H                                            | -2.02600500 | -0.41604600 | -0.66692900 | H | 1.24939600 | -2.61177900 | 0.68017900  |
| H                                            | -2.54573400 | -2.07635100 | -0.45158900 | C | 5.18334000 | 1.61854400  | 2.64988300  |
| C                                            | -0.95191400 | -1.38701000 | 1.71128200  | H | 4.25937100 | 2.28617400  | 0.81869000  |
| H                                            | -2.56816000 | 0.02824400  | 1.78270200  | H | 5.10562100 | 0.75489600  | 0.66052700  |
| H                                            | -3.04450200 | -1.64868500 | 1.95018600  | C | 2.95713700 | 1.69978300  | 3.86150900  |
| H                                            | -0.61707600 | -1.16874100 | 2.73818400  | H | 1.94237400 | 2.35024000  | 2.06344600  |
| O                                            | -0.40589400 | -2.38248100 | 1.08499000  | H | 1.29710300 | 0.85599200  | 2.71845500  |
| C                                            | 5.30832500  | -1.33495700 | 0.81214000  | C | 2.48961500 | 1.60910500  | -3.84797600 |
| C                                            | 4.01985100  | -1.85069300 | 0.65255100  | H | 1.13320900 | 0.41713100  | -2.64291300 |
| C                                            | 3.29568300  | -1.63687600 | -0.53727000 | H | 2.71400500 | -0.31834100 | -2.89771100 |
| C                                            | 3.91374000  | -0.91572100 | -1.57655200 | C | 2.32077700 | 3.56262500  | -2.25496200 |
| C                                            | 5.20179300  | -0.39774400 | -1.41792500 | H | 0.94130700 | 2.45992600  | -0.99534300 |
| C                                            | 5.90350200  | -0.59876600 | -0.22151000 | H | 2.37837400 | 3.02255300  | -0.15584100 |
| H                                            | 5.84703200  | -1.50244100 | 1.74164700  | C | 4.28444300 | -4.19050600 | -0.05060500 |
| H                                            | 3.55499100  | -2.40898800 | 1.46255100  | H | 5.88216900 | -3.16924400 | -1.11843200 |
| H                                            | 3.39341900  | -0.77421300 | -2.51968900 | H | 4.37585100 | -3.30593800 | -2.02413700 |
| H                                            | 5.66288000  | 0.15702900  | -2.23154200 | H | 2.42709300 | -4.83691800 | 0.88179000  |
| H                                            | 6.90563100  | -0.19530600 | -0.10022700 | H | 2.25854200 | -4.33309200 | -0.79913200 |
| C                                            | 1.91565600  | -2.15134900 | -0.63110500 | C | 4.29601700 | 2.41456800  | 3.61944300  |
| H                                            | 1.71369100  | -3.04695400 | -0.04651200 | H | 6.11489100 | 2.16347300  | 2.45177700  |
| C                                            | 0.92695200  | -1.69660700 | -1.47613900 | H | 5.46740200 | 0.66500500  | 3.11725900  |
| H                                            | 0.02024700  | -2.28004900 | -1.61489900 | H | 2.31528400 | 2.30389000  | 4.51497200  |
| H                                            | 1.10540200  | -0.90621100 | -2.19905400 | H | 3.14339600 | 0.75277700  | 4.38793400  |
|                                              |             |             |             | C | 1.85270000 | 2.98320600  | -3.59756200 |
|                                              |             |             |             | H | 2.12027600 | 1.18150200  | -4.78853600 |
|                                              |             |             |             | H | 3.57622800 | 1.73132200  | -3.96142800 |
| <b>IM8</b>                                   |             |             |             | H | 1.83125000 | 4.52535000  | -2.06165100 |
| Sum of electronic and thermal Free Energies= |             |             |             | H | 3.40131700 | 3.75983300  | -2.30147900 |
| Ni                                           | 0.00004800  | -0.00065000 | 0.24975700  | H | 4.55852000 | -5.18922700 | -0.41249300 |
| P                                            | 2.13004700  | 0.06056700  | 0.06068200  | H | 4.78246600 | -4.05807600 | 0.92055300  |
| C                                            | 2.84757200  | -1.61128800 | -0.39077800 | H | 4.82003400 | 2.57568300  | 4.56972600  |
| C                                            | 3.12382700  | 0.59445100  | 1.57263300  |   |            |             |             |

|   |             |             |             |                                              |             |              |             |
|---|-------------|-------------|-------------|----------------------------------------------|-------------|--------------|-------------|
| H | 4.10082400  | 3.40876200  | 3.19264100  | H                                            | -3.57675900 | -1.73281100  | -3.96069700 |
| H | 2.09360200  | 3.67092000  | -4.41757500 | H                                            | -1.83393200 | -4.52709600  | -2.05932100 |
| H | 0.75859700  | 2.87671000  | -3.58152700 | H                                            | -3.40344600 | -3.76063500  | -2.29974500 |
| P | -2.12997800 | -0.06110000 | 0.06078800  | H                                            | -4.55465100 | 5.19017600   | -0.41573500 |
| C | -2.84624100 | 1.61105300  | -0.39161500 | H                                            | -4.77970300 | 4.05996400   | 0.91791900  |
| C | -3.12431700 | -0.59351800 | 1.57286000  | H                                            | -4.82224000 | -2.57216700  | 4.57067000  |
| C | -2.66152500 | -1.20205700 | -1.33047500 | H                                            | -4.10348700 | -3.40638700  | 3.19403800  |
| C | -4.37174000 | 1.70483700  | -0.57039200 | H                                            | -2.09537200 | -3.67361800  | -4.41569100 |
| C | -2.33984800 | 2.68480700  | 0.59470100  | H                                            | -0.75995100 | -2.87990200  | -3.57983900 |
| H | -2.37515500 | 1.83165700  | -1.35888600 |                                              |             |              |             |
| C | -4.45608400 | -1.33062800 | 1.32452000  |                                              |             |              |             |
| C | -2.23228700 | -1.40277500 | 2.54036600  | <b>IM9</b>                                   |             |              |             |
| H | -3.36061800 | 0.35632000  | 2.07358100  | Sum of electronic and thermal Free Energies= |             | -4025.964266 |             |
| C | -2.21050800 | -0.63443600 | -2.69297700 | Ni                                           | -0.10060600 | 0.06049500   | -0.73911700 |
| C | -2.02994000 | -2.59330000 | -1.09892700 | P                                            | 0.00914300  | 2.06540400   | 0.12782800  |
| H | -3.75422300 | -1.30229500 | -1.33828100 | C                                            | -0.99243700 | 3.30863700   | -0.86295600 |
| C | -4.78787800 | 3.11505100  | -1.02639500 | C                                            | 1.69530600  | 2.93728100   | 0.12149300  |
| H | -4.86599300 | 1.48247200  | 0.38406300  | C                                            | -0.68391300 | 2.23127300   | 1.86478600  |
| H | -4.72320800 | 0.95888500  | -1.29294600 | C                                            | -1.15788800 | 4.71823200   | -0.25836300 |
| C | -2.76019700 | 4.09396400  | 0.14553000  | C                                            | -0.45650900 | 3.41949900   | -2.30671500 |
| H | -2.74746700 | 2.49253000  | 1.59697500  | H                                            | -1.98589000 | 2.84800000   | -0.92370700 |
| H | -1.24762800 | 2.61102700  | 0.67921700  | C                                            | 2.40925600  | 3.12769900   | 1.47420200  |
| C | -5.18466700 | -1.61564100 | 2.65035600  | C                                            | 2.61566500  | 2.24076100   | -0.90232000 |
| H | -4.26099600 | -2.28475700 | 0.81954700  | H                                            | 1.49421000  | 3.94663200   | -0.25609000 |
| H | -5.10611600 | -0.75292700 | 0.66061700  | C                                            | -2.22339900 | 2.11594600   | 1.89785400  |
| C | -2.95864100 | -1.69792600 | 3.86225100  | C                                            | -0.09066900 | 1.13258200   | 2.76884700  |
| H | -1.94416600 | -2.34990700 | 2.06457200  | H                                            | -0.40235100 | 3.21493100   | 2.26180700  |
| H | -1.29789600 | -0.85581900 | 2.71897200  | C                                            | -2.10058800 | 5.57391600   | -1.12534300 |
| C | -2.49008100 | -1.61126400 | -3.84714200 | H                                            | -0.18143900 | 5.21609900   | -0.19739500 |
| H | -1.13306800 | -0.41959400 | -2.64243600 | H                                            | -1.54604400 | 4.66957900   | 0.76370200  |
| H | -2.71334200 | 0.31678200  | -2.89783500 | C                                            | -1.40486500 | 4.25575300   | -3.18063500 |
| C | -2.32278000 | -3.56413200 | -2.25316400 | H                                            | 0.52841600  | 3.90415000   | -2.29874900 |
| H | -0.94276000 | -2.46175100 | -0.99384600 | H                                            | -0.31205200 | 2.42178500   | -2.73419900 |
| H | -2.38034800 | -3.02300700 | -0.15430900 | C                                            | 3.74679600  | 3.86742800   | 1.29387700  |
| C | -4.28137000 | 4.19147000  | -0.05320500 | H                                            | 2.61100200  | 2.16160200   | 1.94413500  |
| H | -5.87959800 | 3.17072100  | -1.12076800 | H                                            | 1.77135700  | 3.68563200   | 2.16781800  |
| H | -4.37300300 | 3.30583300  | -2.02624700 | C                                            | 3.96129100  | 2.96348300   | -1.05941000 |
| H | -2.42377300 | 4.83708400  | 0.87924700  | H                                            | 2.78736000  | 1.21113400   | -0.57881000 |
| H | -2.25518800 | 4.33217600  | -0.80134600 | H                                            | 2.11223200  | 2.16346100   | -1.87190600 |
| C | -4.29801000 | -2.41185900 | 3.62036800  | C                                            | -2.75913100 | 2.23385100   | 3.33515700  |
| H | -6.11658700 | -2.15999500 | 2.45240700  | H                                            | -2.51428100 | 1.14269700   | 1.48861300  |
| H | -5.46809000 | -0.66168600 | 3.11726900  | H                                            | -2.69782200 | 2.87557200   | 1.27038500  |
| H | -2.31729000 | -2.30220200 | 4.51605000  | C                                            | -0.60931700 | 1.22764100   | 4.21098900  |
| H | -3.14427300 | -0.75055300 | 4.38823600  | H                                            | -0.37121800 | 0.16166900   | 2.33973900  |
| C | -1.85412300 | -2.98567000 | -3.59597600 | H                                            | 1.00025800  | 1.16841800   | 2.76710300  |
| H | -2.12031900 | -1.18435900 | -4.78785300 | C                                            | -1.61834900 | 5.65528700   | -2.58214100 |

|   |             |             |             |   |             |             |             |
|---|-------------|-------------|-------------|---|-------------|-------------|-------------|
| H | -2.18813700 | 6.58032800  | -0.69746200 | H | -1.34219500 | -2.36872600 | 0.13506300  |
| H | -3.10622600 | 5.13102900  | -1.10046500 | H | -0.51172100 | -2.85375100 | 1.61003400  |
| H | -1.00428300 | 4.33476400  | -4.19885200 | C | -0.47242100 | -5.04195800 | -1.67772000 |
| H | -2.37174300 | 3.73891300  | -3.25839800 | H | -0.28204400 | -2.94823400 | -2.20358600 |
| C | 4.66195500  | 3.14222800  | 0.29557500  | H | 1.23529500  | -3.84396100 | -2.23336100 |
| H | 4.24463200  | 3.96720700  | 2.26631400  | C | 3.97284900  | -1.76583500 | 3.96844300  |
| H | 3.55139300  | 4.88635200  | 0.93094600  | H | 3.06198900  | -3.72336700 | 4.23224000  |
| H | 4.60164900  | 2.40281800  | -1.75199300 | H | 1.93099800  | -2.37594900 | 4.33139800  |
| H | 3.79241900  | 3.95093600  | -1.51190100 | H | 4.52245100  | 0.25462100  | 3.36756100  |
| C | -2.14294900 | 1.17054500  | 4.25628900  | H | 2.82724700  | 0.06356900  | 3.81066100  |
| H | -3.85241900 | 2.14324700  | 3.32788500  | C | 4.73046200  | -2.29001200 | -3.48125500 |
| H | -2.52645400 | 3.23445500  | 3.72605400  | H | 5.66247400  | -3.62146700 | -2.03305900 |
| H | -0.17736900 | 0.41722800  | 4.81163600  | H | 5.71525700  | -1.91548400 | -1.59326600 |
| H | -0.26464700 | 2.17112600  | 4.65708400  | H | 3.59763500  | -0.76342900 | -4.54183800 |
| H | -2.33460600 | 6.22442900  | -3.18741800 | H | 4.44785400  | -0.17539400 | -3.11335200 |
| H | -0.66775500 | 6.20648800  | -2.61483800 | C | -1.77561000 | -4.94138500 | -0.87143600 |
| H | 5.60146200  | 3.69424700  | 0.17021300  | H | -2.42495700 | -4.37166400 | 1.12814400  |
| H | 4.92606400  | 2.15459400  | 0.69974200  | H | -0.89998400 | -5.25378100 | 1.08191000  |
| H | -2.50199100 | 1.30032200  | 5.28457400  | H | -0.68631400 | -5.34464600 | -2.71060800 |
| H | -2.47448000 | 0.17572800  | 3.92648300  | H | 0.15855200  | -5.83042800 | -1.24190200 |
| P | 1.42302700  | -1.55252500 | -0.12220800 | H | 4.18438700  | -1.61719700 | 5.03438700  |
| C | 2.09981300  | -1.58703100 | 1.64941100  | H | 4.88128100  | -2.19305000 | 3.52068400  |
| C | 2.94376100  | -1.59436800 | -1.21613900 | H | 5.64739500  | -2.14059200 | -4.06467300 |
| C | 0.59072900  | -3.23125300 | -0.24515100 | H | 4.17902900  | -3.11077800 | -3.96173600 |
| C | 2.43225800  | -2.94457100 | 2.30697900  | H | -2.30108200 | -5.90451100 | -0.86892300 |
| C | 3.29623100  | -0.62915300 | 1.81299000  | H | -2.44317700 | -4.21435600 | -1.35548300 |
| H | 1.27030400  | -1.16109200 | 2.22319200  | C | -1.74940700 | 0.15069700  | -1.74019700 |
| C | 3.81720700  | -2.86321000 | -1.17392400 | O | -1.06691100 | -0.94407100 | -2.05641600 |
| C | 2.59285400  | -1.19227800 | -2.66564900 | H | -1.81602200 | 0.93777500  | -2.50996400 |
| H | 3.55407600  | -0.77365100 | -0.81824100 | C | -3.02833300 | -0.04526600 | -0.93674800 |
| C | -0.71808800 | -3.15444100 | 0.57560200  | H | -3.46786700 | 0.92321500  | -0.67138800 |
| C | 0.29978400  | -3.71012300 | -1.68264400 | H | -2.78775200 | -0.56101600 | -0.00015300 |
| H | 1.25568200  | -3.97102200 | 0.21641700  | C | -4.06439300 | -0.89834800 | -1.70777900 |
| C | 2.80983000  | -2.75225600 | 3.78857300  | H | -4.40326600 | -0.34664000 | -2.59276000 |
| H | 3.26364000  | -3.42925700 | 1.78131100  | H | -3.55173900 | -1.79921100 | -2.06190300 |
| H | 1.58166400  | -3.62935600 | 2.25198300  | C | -5.24074300 | -1.27925800 | -0.83897300 |
| C | 3.66344600  | -0.42345200 | 3.29026200  | C | -6.43128600 | -0.53403900 | -0.84589100 |
| H | 4.17046800  | -1.04052700 | 1.29236600  | C | -5.14074400 | -2.36548000 | 0.04958400  |
| H | 3.08005600  | 0.33237000  | 1.34397200  | C | -7.49366500 | -0.86333800 | 0.00631000  |
| C | 5.07875200  | -2.69256100 | -2.04000600 | H | -6.52782800 | 0.31109000  | -1.52531800 |
| H | 3.24478600  | -3.72548100 | -1.53505800 | C | -6.19755900 | -2.69954400 | 0.90330100  |
| H | 4.11002600  | -3.09100000 | -0.14444700 | H | -4.22483400 | -2.95357600 | 0.06956200  |
| C | 3.86542900  | -1.02002500 | -3.50931800 | C | -7.38098800 | -1.94798800 | 0.88538400  |
| H | 1.95482600  | -1.95450300 | -3.12548800 | H | -8.40862400 | -0.27559300 | -0.01753400 |
| H | 2.00827500  | -0.26541400 | -2.65482900 | H | -6.10066700 | -3.54593800 | 1.57966500  |
| C | -1.48911800 | -4.48258900 | 0.56521000  | H | -8.20497900 | -2.20648600 | 1.54612900  |

**H-3**

Sum of electronic and thermal Free Energies= -3288.70192

|    |             |             |             |   |             |             |             |
|----|-------------|-------------|-------------|---|-------------|-------------|-------------|
|    |             |             |             | C | 1.86658200  | 4.34797700  | -2.01199500 |
|    |             |             |             | H | 0.02189800  | 5.05610700  | -2.92158200 |
|    |             |             |             | H | 0.56677500  | 3.48822600  | -3.51428900 |
|    |             |             |             | H | 3.45048600  | 3.23954700  | -1.01052000 |
| Ni | -0.19827900 | -1.22075800 | -0.13947900 | H | 2.67808000  | 2.36574700  | -2.33285300 |
| C  | 1.32766400  | -1.05880400 | -1.14000400 | H | 2.52511100  | 4.80790700  | -2.75869400 |
| O  | 1.35086600  | -0.84537600 | -2.35270600 | H | 1.78207200  | 5.06195300  | -1.18060700 |
| C  | -1.31844600 | -3.17718100 | 0.33379900  | C | -1.00563700 | 1.75025500  | 1.58556500  |
| C  | -2.46857600 | -3.54327600 | -0.42285800 | C | -2.02859700 | 2.90005600  | 1.70027700  |
| C  | -3.74440600 | -3.48189900 | 0.12899000  | C | -1.20635900 | 0.71003700  | 2.70795400  |
| C  | -3.93897600 | -3.02666300 | 1.44628000  | H | -0.00683600 | 2.18022700  | 1.73425600  |
| C  | -2.83256500 | -2.62651200 | 2.19757000  | C | -1.97412300 | 3.54930500  | 3.09454100  |
| C  | -1.54305700 | -2.69562400 | 1.65238300  | H | -3.04108900 | 2.51643000  | 1.53020000  |
| H  | -2.34591200 | -3.89548900 | -1.44257100 | H | -1.84830800 | 3.65762600  | 0.93231800  |
| H  | -4.60213100 | -3.78046800 | -0.46948800 | C | -1.16597200 | 1.36843400  | 4.09579300  |
| H  | -4.94012200 | -2.97292800 | 1.86574400  | H | -2.16554600 | 0.19707900  | 2.57617300  |
| H  | -2.96399800 | -2.26110000 | 3.21322300  | H | -0.43251400 | -0.06194700 | 2.63005800  |
| H  | -0.68612100 | -2.43514300 | 2.27027700  | C | -2.18603500 | 2.51176200  | 4.20697900  |
| C  | 2.63558300  | -1.18506700 | -0.34712000 | H | -2.73000400 | 4.34133000  | 3.16117900  |
| H  | 2.50190700  | -0.68569900 | 0.61927400  | H | -0.99603200 | 4.03186600  | 3.22985700  |
| H  | 2.74893100  | -2.25012700 | -0.11021100 | H | -1.35192000 | 0.61275600  | 4.86887200  |
| C  | 3.88703200  | -0.66431700 | -1.07906400 | H | -0.15720400 | 1.76579500  | 4.27650400  |
| H  | 4.03988700  | -1.26136800 | -1.98317200 | H | -2.11591200 | 2.99018700  | 5.19140700  |
| H  | 3.70882800  | 0.36347800  | -1.40841700 | H | -3.20158900 | 2.09884800  | 4.12597800  |
| C  | 5.10759500  | -0.72172100 | -0.18919900 | C | -2.56618300 | 0.98324800  | -0.88558700 |
| C  | 5.90705800  | -1.87600100 | -0.13003300 | C | -2.47002900 | 0.43423700  | -2.32733200 |
| C  | 5.43917700  | 0.36211100  | 0.64244000  | C | -3.57169500 | 0.14757300  | -0.07102200 |
| C  | 7.00668200  | -1.94731300 | 0.73384000  | H | -2.90925300 | 2.02460800  | -0.91898100 |
| H  | 5.66663900  | -2.72490000 | -0.76779000 | C | -3.84827700 | 0.37937000  | -3.00504900 |
| C  | 6.53741600  | 0.29689700  | 1.50822800  | H | -2.04409200 | -0.57844500 | -2.28728300 |
| H  | 4.83265300  | 1.26557800  | 0.60927000  | H | -1.78556400 | 1.03866400  | -2.93136400 |
| C  | 7.32618800  | -0.86016600 | 1.55813500  | C | -4.94853500 | 0.08000700  | -0.74882800 |
| H  | 7.61523300  | -2.84833000 | 0.76186700  | H | -3.17509800 | -0.86522700 | 0.03600700  |
| H  | 6.77955500  | 1.14808200  | 2.14056300  | H | -3.68293500 | 0.54670300  | 0.94107500  |
| H  | 8.18107700  | -0.91259100 | 2.22795900  | C | -4.84236700 | -0.45427800 | -2.18397400 |
| P  | -0.87775400 | 0.92299600  | -0.09221800 | H | -3.74407000 | -0.03436700 | -4.01555300 |
| C  | 0.16995900  | 2.06516700  | -1.14377200 | H | -4.23604300 | 1.40152600  | -3.11900800 |
| C  | -0.46098900 | 3.39135200  | -1.61451100 | H | -5.61359800 | -0.55686300 | -0.15302900 |
| C  | 1.54095600  | 2.34603800  | -0.49358800 | H | -5.39726500 | 1.08342300  | -0.76572200 |
| H  | 0.36066300  | 1.44857900  | -2.03093800 | H | -5.82810200 | -0.45698700 | -2.66515700 |
| C  | 0.47208500  | 4.10559900  | -2.61017600 | H | -4.49812000 | -1.49707100 | -2.15247200 |
| H  | -0.63202100 | 4.04815400  | -0.75326500 | C | 0.04785600  | -3.17259700 | -0.20924600 |
| H  | -1.43407400 | 3.22456100  | -2.08612500 | H | 0.79156200  | -3.42700500 | 0.55449400  |
| C  | 2.48347700  | 3.04156700  | -1.48909100 | C | 0.30941200  | -3.88407500 | -1.52846600 |
| H  | 1.40954700  | 3.00100200  | 0.37731300  | H | 1.37028800  | -3.82268300 | -1.79002000 |
| H  | 1.99222100  | 1.42252600  | -0.12243800 | H | 0.03593200  | -4.94911000 | -1.49032500 |

|                                              |              |             |             |   |             |             |             |
|----------------------------------------------|--------------|-------------|-------------|---|-------------|-------------|-------------|
| H                                            | -0.24605900  | -3.42435400 | -2.35284400 | H | 0.71770400  | -0.02184800 | -2.10481900 |
|                                              |              |             |             | C | 0.97583800  | -3.20634900 | -3.51774500 |
|                                              |              |             |             | H | 0.23551400  | -4.98232800 | -2.50119700 |
| <b>H-TS2</b>                                 |              |             |             | H | 1.49710800  | -4.11796100 | -1.62432100 |
| Sum of electronic and thermal Free Energies= | -3288.682353 |             |             | H | 1.63945300  | -1.22082400 | -4.11275500 |
| Ni                                           | -0.41930400  | 1.23143500  | 0.28670500  | H | 2.36196600  | -1.80787300 | -2.61587700 |
| C                                            | 1.14287400   | 1.21234100  | 1.34070500  | H | 1.76523900  | -3.73631100 | -4.06445800 |
| O                                            | 1.11400400   | 0.98605700  | 2.57055200  | H | 0.10202500  | -3.16519000 | -4.18340700 |
| C                                            | -0.37118600  | 3.26994100  | -0.10481100 | C | -2.79148300 | -0.86698100 | -0.85442400 |
| C                                            | -1.64634200  | 3.73171100  | 0.32622300  | C | -3.72316200 | -2.03215200 | -0.46386300 |
| C                                            | -2.65601100  | 4.02446800  | -0.59409000 | C | -3.52524800 | 0.48421500  | -0.72556100 |
| C                                            | -2.44757000  | 3.84950200  | -1.96920900 | H | -2.53027900 | -0.99020000 | -1.91454900 |
| C                                            | -1.20975700  | 3.36918000  | -2.41718500 | C | -5.01278100 | -2.01051000 | -1.30388500 |
| C                                            | -0.18703200  | 3.08394100  | -1.50645000 | H | -3.99454000 | -1.94744100 | 0.59579100  |
| H                                            | -1.83535200  | 3.87680900  | 1.38473300  | H | -3.21847400 | -2.99565600 | -0.58469900 |
| H                                            | -3.61806100  | 4.38137400  | -0.23380000 | C | -4.82478400 | 0.50275000  | -1.54475200 |
| H                                            | -3.24031500  | 4.07307200  | -2.67820000 | H | -3.75427700 | 0.67925600  | 0.33072900  |
| H                                            | -1.03513500  | 3.21853000  | -3.47993600 | H | -2.86995600 | 1.29621000  | -1.05339600 |
| H                                            | 0.78143000   | 2.74953600  | -1.87120800 | C | -5.74683600 | -0.66758900 | -1.17225400 |
| C                                            | 2.33364300   | 0.67570700  | 0.52915300  | H | -5.66669700 | -2.83526000 | -0.99497500 |
| H                                            | 2.26984400   | -0.41691200 | 0.56558500  | H | -4.75894900 | -2.18493400 | -2.35894700 |
| H                                            | 2.25427200   | 0.97072100  | -0.52245900 | H | -5.33961600 | 1.46026300  | -1.39860900 |
| C                                            | 3.69960400   | 1.11409000  | 1.10103000  | H | -4.57302600 | 0.43935500  | -2.61296800 |
| H                                            | 3.77564800   | 2.20676200  | 1.06668100  | H | -6.64495200 | -0.66164300 | -1.80193900 |
| H                                            | 3.73925900   | 0.81861300  | 2.15396600  | H | -6.08599800 | -0.54392500 | -0.13398300 |
| C                                            | 4.83866200   | 0.48894600  | 0.32816700  | C | -1.30405300 | -1.78078300 | 1.58833100  |
| C                                            | 5.42601200   | 1.15405200  | -0.76114200 | C | 0.05090900  | -2.26416400 | 2.14733100  |
| C                                            | 5.29066900   | -0.80477200 | 0.64204800  | C | -2.03168300 | -0.89362400 | 2.62309200  |
| C                                            | 6.43800300   | 0.54720400  | -1.51561600 | H | -1.91960300 | -2.66445800 | 1.38228700  |
| H                                            | 5.08793500   | 2.15592500  | -1.02035700 | C | -0.13388200 | -2.98817900 | 3.49263200  |
| C                                            | 6.30153900   | -1.41653900 | -0.10792900 | H | 0.71290300  | -1.40337000 | 2.28745400  |
| H                                            | 4.84555800   | -1.33584500 | 1.48177600  | H | 0.53794500  | -2.94322600 | 1.43920200  |
| C                                            | 6.87970800   | -0.74221100 | -1.19214200 | C | -2.20761300 | -1.61748800 | 3.96719600  |
| H                                            | 6.88234600   | 1.08034700  | -2.35303600 | H | -1.43946200 | 0.02010600  | 2.76526800  |
| H                                            | 6.63985000   | -2.41662300 | 0.15356200  | H | -3.01009600 | -0.58144900 | 2.23996800  |
| H                                            | 7.66642100   | -1.21480400 | -1.77523900 | C | -0.86045000 | -2.10647200 | 4.51916300  |
| P                                            | -1.11739000  | -0.80179700 | 0.00969400  | H | 0.84510100  | -3.29650400 | 3.88001900  |
| C                                            | 0.01025000   | -1.80693000 | -1.08462400 | H | -0.71438900 | -3.90785200 | 3.33147600  |
| C                                            | -0.46597700  | -3.23158900 | -1.42480300 | H | -2.69547700 | -0.94818300 | 4.68654100  |
| C                                            | 0.36409400   | -1.02523200 | -2.36723400 | H | -2.87768800 | -2.47814200 | 3.82997200  |
| H                                            | 0.93439000   | -1.89049700 | -0.49927900 | H | -1.01041400 | -2.65849400 | 5.45523600  |
| C                                            | 0.60023200   | -3.98030100 | -2.24433800 | H | -0.23197400 | -1.23789700 | 4.75852000  |
| H                                            | -1.39191300  | -3.17822800 | -2.01129600 | C | 0.75054900  | 2.97460600  | 0.85735600  |
| H                                            | -0.69874600  | -3.79192300 | -0.51227100 | H | 1.69428300  | 3.16463700  | 0.34324600  |
| C                                            | 1.42542400   | -1.77363300 | -3.18994300 | C | 0.67243600  | 3.70979400  | 2.18863500  |
| H                                            | -0.53673900  | -0.88924600 | -2.98102800 | H | -0.13211900 | 3.31062100  | 2.81173300  |

|                                              |              |             |             |   |             |             |             |
|----------------------------------------------|--------------|-------------|-------------|---|-------------|-------------|-------------|
| H                                            | 1.60166300   | 3.57792100  | 2.74782400  | H | 1.08752800  | -0.11811100 | -3.06951300 |
| H                                            | 0.49817000   | 4.78159000  | 2.03549100  | H | -0.20131800 | 0.82579100  | -2.33297300 |
|                                              |              |             |             | C | -0.55431200 | -2.12476600 | -4.17335000 |
|                                              |              |             |             | H | -0.26108600 | -4.08217000 | -3.27270500 |
| <b>H-4</b>                                   |              |             |             | H | -1.57659700 | -3.15497700 | -2.56744900 |
| Sum of electronic and thermal Free Energies= | -3288.698098 |             |             | H | -0.83198100 | -0.01355800 | -4.62192900 |
| Ni                                           | 0.89908900   | 1.71084400  | 0.27555700  | H | -1.91381500 | -0.63660300 | -3.38238600 |
| C                                            | -2.54478000  | 2.63322200  | -0.72034400 | H | -1.26707800 | -2.47343000 | -4.93093400 |
| O                                            | -2.81982100  | 2.85485700  | -1.89521600 | H | 0.44031000  | -2.14400700 | -4.64145800 |
| C                                            | -0.44809400  | 3.46459300  | 0.37686300  | C | 2.88517300  | -0.90121000 | -0.60393000 |
| C                                            | 0.07252000   | 3.17414600  | 1.66479000  | C | 3.37542600  | -2.29627600 | -0.15912100 |
| C                                            | 1.47132000   | 3.06811300  | 1.87340400  | C | 3.93996000  | 0.16540200  | -0.24598400 |
| C                                            | 2.36426500   | 3.25137400  | 0.79205600  | H | 2.81461100  | -0.91219100 | -1.70123200 |
| C                                            | 1.85290600   | 3.48526300  | -0.50751200 | C | 4.74139100  | -2.63167800 | -0.78468300 |
| C                                            | 0.45377300   | 3.58259500  | -0.71512300 | H | 3.47803900  | -2.32007400 | 0.93245500  |
| H                                            | -0.60717200  | 3.04919000  | 2.50273600  | H | 2.65353500  | -3.07408300 | -0.41960000 |
| H                                            | 1.85369300   | 2.83984600  | 2.86327800  | C | 5.31308700  | -0.16773500 | -0.85220900 |
| H                                            | 3.43359100   | 3.15356300  | 0.94741800  | H | 4.03109300  | 0.24149700  | 0.84616500  |
| H                                            | 2.53042300   | 3.57643400  | -1.35077800 | H | 3.59815200  | 1.14424600  | -0.59340600 |
| H                                            | 0.07036200   | 3.76230400  | -1.71463100 | C | 5.79313600  | -1.56715400 | -0.43984400 |
| C                                            | -2.74731000  | 1.26750100  | -0.09315100 | H | 5.07262900  | -3.62031000 | -0.44245300 |
| H                                            | -2.94520200  | 1.37960500  | 0.97711000  | H | 4.63200600  | -2.69498100 | -1.87679000 |
| H                                            | -1.77140700  | 0.76877900  | -0.15239600 | H | 6.04701400  | 0.59143200  | -0.55311700 |
| C                                            | -3.84529800  | 0.43267800  | -0.77091000 | H | 5.23954500  | -0.12116400 | -1.94831900 |
| H                                            | -3.62549300  | 0.34978100  | -1.83814000 | H | 6.74899900  | -1.80250400 | -0.92434500 |
| H                                            | -4.79649700  | 0.97223700  | -0.68667500 | H | 5.97505100  | -1.58110100 | 0.64436000  |
| C                                            | -3.97488300  | -0.94370900 | -0.15257400 | C | 0.76944800  | -1.44735000 | 1.43289300  |
| C                                            | -3.64330800  | -2.09406500 | -0.88173000 | C | -0.73111400 | -1.42409100 | 1.78848300  |
| C                                            | -4.39991700  | -1.09918400 | 1.17841400  | C | 1.59680500  | -0.93035300 | 2.62984600  |
| C                                            | -3.70595100  | -3.36530100 | -0.29747100 | H | 1.05733100  | -2.48487900 | 1.22316400  |
| H                                            | -3.33000600  | -1.99316600 | -1.91688800 | C | -1.02342700 | -2.20987900 | 3.07747300  |
| C                                            | -4.47394000  | -2.36545000 | 1.76570700  | H | -1.04748500 | -0.38017100 | 1.91929700  |
| H                                            | -4.66926800  | -0.22147000 | 1.76289200  | H | -1.33672900 | -1.83555000 | 0.97548100  |
| C                                            | -4.11902600  | -3.50560400 | 1.03182900  | C | 1.31165100  | -1.72209500 | 3.91554700  |
| H                                            | -3.43013800  | -4.24140700 | -0.87988600 | H | 1.34734500  | 0.12868900  | 2.78399700  |
| H                                            | -4.80065700  | -2.46409600 | 2.79816800  | H | 2.66815600  | -0.96250900 | 2.40542000  |
| H                                            | -4.16433300  | -4.48945200 | 1.49226900  | C | -0.18469700 | -1.70206000 | 4.25836700  |
| P                                            | 1.13671800   | -0.37775800 | -0.06695400 | H | -2.09269200 | -2.14564200 | 3.30744900  |
| C                                            | 0.07228900   | -1.12632300 | -1.43215500 | H | -0.80291000 | -3.27343200 | 2.90685200  |
| C                                            | 0.38428100   | -2.57609200 | -1.85198200 | H | 1.90044000  | -1.30921000 | 4.74451900  |
| C                                            | 0.07114000   | -0.18620800 | -2.65537600 | H | 1.63959400  | -2.76287100 | 3.78175900  |
| H                                            | -0.94367200  | -1.11405200 | -1.01899400 | H | -0.38149500 | -2.30390700 | 5.15447400  |
| C                                            | -0.55796300  | -3.07189800 | -2.96385000 | H | -0.48460900 | -0.67117000 | 4.49590300  |
| H                                            | 1.41266900   | -2.63695400 | -2.22725700 | C | -1.94159000 | 3.71555000  | 0.18061000  |
| H                                            | 0.31859700   | -3.24668900 | -0.98720400 | C | -2.21721300 | 5.12882000  | -0.35502200 |
| C                                            | -0.88111200  | -0.68317300 | -3.75422700 | H | -3.29456600 | 5.31071000  | -0.42182600 |

|                                                           |             |             |             |   |             |             |             |
|-----------------------------------------------------------|-------------|-------------|-------------|---|-------------|-------------|-------------|
| H                                                         | -1.79128200 | 5.26431000  | -1.35177200 | C | 1.81016400  | 1.89852400  | 1.98274400  |
| H                                                         | -1.77913100 | 5.87474000  | 0.31514800  | C | 2.88326800  | -1.22866700 | 2.86405400  |
| H                                                         | -2.41862900 | 3.61099500  | 1.16079600  | C | 2.04805700  | -2.27227900 | 0.71114800  |
|                                                           |             |             |             | H | 3.32538000  | -0.56429100 | 0.85883900  |
|                                                           |             |             |             | C | -0.35057100 | 0.14922400  | 3.60668200  |
| <b>dist-TS1-2</b>                                         |             |             |             | C | -1.65439900 | 0.43917700  | 1.46261200  |
| Sum of electronic and thermal Free Energies= -3851.947089 |             |             |             | H | -0.40538800 | -1.23107800 | 1.94773300  |
| C                                                         | 2.16044100  | 1.36156100  | -1.79018700 | C | 3.27344900  | 2.22295100  | 1.62730200  |
| C                                                         | 1.12977900  | 1.30441000  | -2.94094500 | C | 0.89751900  | 3.09907000  | 1.65043200  |
| Ni                                                        | 0.71617000  | 0.53429700  | -0.94502400 | H | 1.75939900  | 1.70894400  | 3.06185200  |
| C                                                         | -0.52460200 | 1.06181600  | -2.70688300 | C | 4.04036100  | -2.24227300 | 2.90620100  |
| H                                                         | -0.80799000 | 0.88208100  | -3.75196900 | H | 2.03339900  | -1.64330100 | 3.41915900  |
| C                                                         | -1.21693000 | 2.34137600  | -2.20605200 | H | 3.17587300  | -0.30249600 | 3.37038800  |
| H                                                         | -0.97549600 | 3.16979000  | -2.88269800 | C | 3.19006000  | -3.29889200 | 0.76278500  |
| H                                                         | -0.83028600 | 2.61879200  | -1.21760600 | H | 1.15738500  | -2.69152200 | 1.19470800  |
| C                                                         | -2.74504500 | 2.17926600  | -2.11112300 | H | 1.77787600  | -2.06885400 | -0.32940700 |
| H                                                         | -3.14644500 | 1.96215400  | -3.10857900 | C | -1.60044700 | -0.43982500 | 4.28541200  |
| H                                                         | -2.96773600 | 1.31680200  | -1.47828800 | H | -0.34242300 | 1.23414600  | 3.77009700  |
| C                                                         | -3.40216300 | 3.41572800  | -1.53758100 | H | 0.55006200  | -0.24840400 | 4.08156600  |
| C                                                         | -3.74960300 | 4.50041300  | -2.36018700 | C | -2.90776500 | -0.13609100 | 2.13915200  |
| C                                                         | -3.63140600 | 3.52663100  | -0.15559600 | H | -1.65395100 | 1.52956200  | 1.57822600  |
| C                                                         | -4.30959000 | 5.66419800  | -1.81916000 | H | -1.68485100 | 0.24532900  | 0.38893800  |
| H                                                         | -3.58220300 | 4.43143700  | -3.43369400 | C | 3.74780300  | 3.50092800  | 2.33826100  |
| C                                                         | -4.18950800 | 4.68799700  | 0.39192700  | H | 3.35463200  | 2.36864400  | 0.54767900  |
| H                                                         | -3.37413200 | 2.69457700  | 0.49605900  | H | 3.93579300  | 1.39115600  | 1.88533700  |
| C                                                         | -4.53037700 | 5.76325600  | -0.43891900 | C | 1.37864800  | 4.38484700  | 2.34191800  |
| H                                                         | -4.57581500 | 6.49148400  | -2.47309700 | H | 0.88972300  | 3.24218400  | 0.56135200  |
| H                                                         | -4.36184700 | 4.75202100  | 1.46392400  | H | -0.13538100 | 2.89369600  | 1.94545800  |
| H                                                         | -4.96677900 | 6.66539700  | -0.01705700 | C | 3.65767300  | -3.55439700 | 2.20384700  |
| H                                                         | 1.11639200  | 2.27881100  | -3.43233000 | H | 4.32410200  | -2.43554500 | 3.94772800  |
| H                                                         | 1.40763700  | 0.53950500  | -3.66519400 | H | 4.91913100  | -1.80507300 | 2.41207800  |
| H                                                         | 2.39248800  | 2.38170000  | -1.47798200 | H | 2.86367700  | -4.23535100 | 0.29411000  |
| C                                                         | 3.36268600  | 0.49296500  | -1.88451600 | H | 4.03048200  | -2.92110900 | 0.16653600  |
| C                                                         | 4.62321200  | 0.96032300  | -1.46117000 | C | -2.89172900 | 0.10326100  | 3.65548000  |
| C                                                         | 3.27707500  | -0.83826200 | -2.35222700 | H | -1.57453500 | -0.21416200 | 5.35837200  |
| C                                                         | 5.74647500  | 0.12760500  | -1.47295600 | H | -1.57952600 | -1.53427200 | 4.18991500  |
| H                                                         | 4.72857000  | 1.98791900  | -1.12291700 | H | -3.80451600 | 0.30704700  | 1.68888200  |
| C                                                         | 4.39804900  | -1.66867000 | -2.36593300 | H | -2.95747900 | -1.21465800 | 1.94229600  |
| H                                                         | 2.32173400  | -1.22672300 | -2.69689600 | C | 2.84335800  | 4.69568500  | 2.00393400  |
| C                                                         | 5.63998100  | -1.19517500 | -1.92004000 | H | 4.78482500  | 3.71355500  | 2.05191800  |
| H                                                         | 6.70591700  | 0.51384500  | -1.13674800 | H | 3.74600400  | 3.33360900  | 3.42432900  |
| H                                                         | 4.30140100  | -2.69349400 | -2.71694300 | H | 0.73140700  | 5.22061800  | 2.05045500  |
| H                                                         | 6.51076300  | -1.84597500 | -1.92515800 | H | 1.27407300  | 4.26692700  | 3.42939300  |
| P                                                         | 1.17573500  | 0.36089900  | 1.14062800  | H | 4.50652600  | -4.24878500 | 2.20912000  |
| C                                                         | 2.45908800  | -0.95864300 | 1.40775100  | H | 2.84772600  | -4.03904700 | 2.76703500  |
| C                                                         | -0.36661900 | -0.14367800 | 2.09043700  | H | -3.76760700 | -0.36158900 | 4.12388400  |

|                                              |              |             |             |   |             |             |             |
|----------------------------------------------|--------------|-------------|-------------|---|-------------|-------------|-------------|
| H                                            | -2.96108000  | 1.18255500  | 3.85201200  | C | 3.29833300  | -3.56574300 | -0.86024800 |
| H                                            | 3.17703900   | 5.58997200  | 2.54368100  | C | 5.70513900  | -3.74527200 | -2.26265400 |
| H                                            | 2.92682000   | 4.92137400  | 0.93145900  | H | 5.89956000  | -1.62843100 | -1.88599500 |
| O                                            | -0.87345900  | -0.07476400 | -1.93587400 | C | 3.71195800  | -4.79647500 | -1.37939700 |
| C                                            | -5.80323100  | -4.37717900 | 0.31169700  | H | 2.36031100  | -3.50035100 | -0.31254200 |
| C                                            | -4.93240900  | -3.45251200 | -0.27634700 | C | 4.92022500  | -4.89098400 | -2.08443800 |
| C                                            | -3.56320200  | -3.42491200 | 0.05508700  | H | 6.64523900  | -3.80914400 | -2.80572000 |
| C                                            | -3.09418200  | -4.35861200 | 1.00112000  | H | 3.09578700  | -5.68062400 | -1.23263600 |
| C                                            | -3.95761100  | -5.28592800 | 1.59551800  | H | 5.24621600  | -5.84678000 | -2.48740900 |
| C                                            | -5.31614000  | -5.29689800 | 1.25055900  | H | 1.15010200  | 1.06294200  | -2.91331100 |
| H                                            | -6.85724700  | -4.38269200 | 0.04282400  | H | 0.51897500  | 2.40071700  | -1.89622400 |
| H                                            | -5.31625900  | -2.73847100 | -1.00147200 | H | -0.89320900 | -0.11840900 | -2.86382500 |
| H                                            | -2.04160700  | -4.35247500 | 1.27466000  | C | -2.05076500 | 1.55293300  | -2.12907500 |
| H                                            | -3.57719200  | -5.99771700 | 2.32489000  | C | -3.20565000 | 1.14926800  | -2.82929300 |
| H                                            | -5.99022000  | -6.01605000 | 1.71050500  | C | -2.10900200 | 2.77070400  | -1.41806200 |
| B                                            | -2.59378300  | -2.37305300 | -0.59331400 | C | -4.37163000 | 1.92128100  | -2.81218800 |
| O                                            | -3.08775500  | -1.44387900 | -1.46855700 | H | -3.19111300 | 0.22316000  | -3.39801100 |
| H                                            | -2.36739000  | -0.81949300 | -1.76289900 | C | -3.26775200 | 3.54735000  | -1.40792000 |
| O                                            | -1.26025200  | -2.42753600 | -0.22946800 | H | -1.24397300 | 3.10448400  | -0.85546200 |
| H                                            | -0.74158800  | -1.72262000 | -0.65796300 | C | -4.41071700 | 3.12762300  | -2.10240900 |
| C                                            | 1.20789500   | -4.14239100 | -3.92490100 | H | -5.24839900 | 1.58194800  | -3.35901200 |
| C                                            | 0.36881500   | -3.26275800 | -3.00978700 | H | -3.28191200 | 4.47802900  | -0.84563600 |
| H                                            | 0.74616100   | -4.22152000 | -4.91508200 | H | -5.31600000 | 3.72923300  | -2.08771500 |
| H                                            | 2.21197900   | -3.72145400 | -4.04649800 | P | -1.60096400 | -1.12954500 | 0.48970100  |
| H                                            | 1.30347800   | -5.15013900 | -3.50626300 | C | -3.21189800 | -0.24621600 | 0.79843700  |
| H                                            | 0.83928600   | -3.20230600 | -2.01795900 | C | -1.01776100 | -1.78798200 | 2.15226200  |
| H                                            | -0.62980000  | -3.70119300 | -2.86623400 | C | -2.02650700 | -2.64227300 | -0.51720700 |
| O                                            | 0.26369500   | -1.96048600 | -3.59815400 | C | -4.35221800 | -1.07336300 | 1.42245000  |
| H                                            | -0.19603400  | -1.35801500 | -2.96154600 | C | -2.98123700 | 1.05194400  | 1.59996600  |
|                                              |              |             |             | H | -3.51798300 | 0.05710600  | -0.21129800 |
|                                              |              |             |             | C | -1.69365900 | -3.08625500 | 2.64645200  |
| <b>dist-TS1-3</b>                            |              |             |             | C | 0.51746500  | -1.94655700 | 2.22595600  |
| Sum of electronic and thermal Free Energies= | -3851.937118 |             |             | H | -1.28830400 | -0.97895600 | 2.84405100  |
| C                                            | -0.83185000  | 0.70411700  | -2.14992400 | C | -2.89284400 | -2.32607600 | -1.75079600 |
| C                                            | 0.52007700   | 1.32890800  | -2.06776800 | C | -0.73750800 | -3.37702700 | -0.94348800 |
| Ni                                           | -0.15268600  | 0.19080700  | -0.45033900 | H | -2.60346100 | -3.30545700 | 0.13837400  |
| C                                            | 1.84211600   | 0.77313000  | -0.83564600 | C | -5.64630600 | -0.24423800 | 1.49070000  |
| H                                            | 2.43167000   | 1.67547200  | -0.99985800 | H | -4.07479300 | -1.36887200 | 2.44106400  |
| C                                            | 2.48963100   | -0.49072600 | -1.41255900 | H | -4.52572100 | -1.99515500 | 0.85656600  |
| H                                            | 2.90826500   | -0.25683100 | -2.39699200 | C | -4.27483200 | 1.87570600  | 1.70227700  |
| H                                            | 1.72456200   | -1.25776600 | -1.57429800 | H | -2.61982400 | 0.81386700  | 2.60838400  |
| C                                            | 3.58450400   | -1.07887500 | -0.50188000 | H | -2.20518200 | 1.64658100  | 1.10791800  |
| H                                            | 4.41151200   | -0.36737900 | -0.41236900 | C | -1.25789400 | -3.40618100 | 4.08814600  |
| H                                            | 3.16258700   | -1.21085000 | 0.49814200  | H | -1.39892400 | -3.92014200 | 1.99705600  |
| C                                            | 4.07720900   | -2.40733500 | -1.03301300 | H | -2.78315300 | -3.02005500 | 2.59813200  |
| C                                            | 5.28375500   | -2.51421400 | -1.74159700 | C | 0.96470000  | -2.26537900 | 3.66102700  |



|   |             |             |             |                                              |             |             |             |
|---|-------------|-------------|-------------|----------------------------------------------|-------------|-------------|-------------|
| H | 0.83590900  | -2.76358400 | 1.56611000  | C                                            | 0.82234900  | 5.22778600  | -1.50171400 |
| H | 1.00656500  | -1.04262400 | 1.86885900  | C                                            | 1.09891700  | 6.63391200  | -2.01557200 |
| C | -3.21211300 | -3.60242900 | -2.54669800 | H                                            | 1.75641700  | 4.64737100  | -1.47159700 |
| H | -2.35101900 | -1.63160400 | -2.39869500 | H                                            | 0.13247600  | 4.70996800  | -2.18630400 |
| H | -3.82391000 | -1.82981200 | -1.46048300 | H                                            | 0.17447500  | 7.22124000  | -2.03995300 |
| C | -1.04719000 | -4.64486400 | -1.75459400 | H                                            | 1.81636200  | 7.14653800  | -1.36576800 |
| H | -0.12757300 | -2.69352700 | -1.54881600 | H                                            | 1.51099100  | 6.59815800  | -3.02999500 |
| H | -0.13728900 | -3.64282800 | -0.06884900 | O                                            | 0.24852100  | 5.31713200  | -0.19267800 |
| C | -5.43128100 | 1.05156000  | 2.28756900  | H                                            | 0.31981900  | 4.43216600  | 0.23404300  |
| H | -6.44534400 | -0.84356200 | 1.94354900  |                                              |             |             |             |
| H | -5.97136600 | 0.00264200  | 0.47041000  |                                              |             |             |             |
| H | -4.09404200 | 2.76948300  | 2.31164600  | <b>dist-TS1-4</b>                            |             |             |             |
| H | -4.54806100 | 2.22537500  | 0.69947700  | Sum of electronic and thermal Free Energies= |             |             |             |
| C | 0.26938600  | -3.52190900 | 4.20571200  | C                                            | 2.31841100  | -0.30064100 | -1.94727600 |
| H | -1.73686700 | -4.33621600 | 4.41776300  | C                                            | 1.50890700  | 0.40616200  | -3.06453200 |
| H | -1.61706500 | -2.61062000 | 4.75564400  | Ni                                           | 0.68331700  | -0.00538000 | -1.09099300 |
| H | 2.05437700  | -2.39005500 | 3.68829800  | C                                            | 0.22540200  | 1.43627300  | -2.74105000 |
| H | 0.72769200  | -1.40737100 | 4.30596900  | H                                            | -0.14026200 | 1.59117300  | -3.76565300 |
| C | -1.93006800 | -4.33365300 | -2.97128800 | C                                            | 0.76960200  | 2.76310900  | -2.16900400 |
| H | -3.81380800 | -3.34342200 | -3.42619700 | H                                            | 1.40557500  | 3.25127500  | -2.91799700 |
| H | -3.82601100 | -4.27119300 | -1.92753100 | H                                            | 1.41317500  | 2.54919700  | -1.30677200 |
| H | -0.10763400 | -5.11409500 | -2.07073800 | C                                            | -0.34179000 | 3.72474600  | -1.71422000 |
| H | -1.56173200 | -5.36830700 | -1.10709400 | H                                            | -0.92114600 | 4.05884900  | -2.58286700 |
| H | -6.35154400 | 1.64801000  | 2.29896400  | H                                            | -1.02269000 | 3.16976100  | -1.06261300 |
| H | -5.20544100 | 0.79648700  | 3.33259000  | C                                            | 0.22780500  | 4.91089900  | -0.96699200 |
| H | 0.55742100  | -3.69795000 | 5.24927700  | C                                            | 0.43047100  | 6.15106700  | -1.59225800 |
| H | 0.60748700  | -4.39597500 | 3.63133000  | C                                            | 0.61928200  | 4.76993100  | 0.37690300  |
| H | -2.17765800 | -5.25713300 | -3.50821100 | C                                            | 1.00738900  | 7.22265000  | -0.89677900 |
| H | -1.36880300 | -3.69910000 | -3.67157800 | H                                            | 0.13441900  | 6.28031500  | -2.63174100 |
| O | 1.52215500  | 0.62676700  | 0.50840000  | C                                            | 1.19768400  | 5.83394200  | 1.07597900  |
| B | 1.49123500  | 1.91995100  | 1.46487600  | H                                            | 0.46811100  | 3.81548100  | 0.87678500  |
| C | 2.97292600  | 2.56663100  | 1.41179000  | C                                            | 1.39496700  | 7.06785100  | 0.43994800  |
| C | 4.10358400  | 1.76624900  | 1.67534600  | H                                            | 1.15311800  | 8.17682200  | -1.39809000 |
| C | 3.20442500  | 3.92902400  | 1.14566200  | H                                            | 1.49202400  | 5.70274800  | 2.11488500  |
| C | 5.40146400  | 2.29059700  | 1.67050100  | H                                            | 1.84234200  | 7.89828100  | 0.98081800  |
| H | 3.97085200  | 0.70491600  | 1.87883200  | H                                            | 2.18614400  | 1.09421500  | -3.57595100 |
| C | 4.49943900  | 4.46831000  | 1.13424700  | H                                            | 1.13186700  | -0.31315500 | -3.79245600 |
| H | 2.36207000  | 4.58740500  | 0.94937700  | H                                            | 3.13613500  | 0.32148800  | -1.57504800 |
| C | 5.60555400  | 3.65034500  | 1.39529500  | C                                            | 2.74016000  | -1.70553300 | -2.17378200 |
| H | 6.25201700  | 1.64342400  | 1.87637600  | C                                            | 4.01314100  | -2.14414600 | -1.75512800 |
| H | 4.64476800  | 5.52588200  | 0.92122900  | C                                            | 1.88548100  | -2.65715800 | -2.77229800 |
| H | 6.61146200  | 4.06450600  | 1.38560000  | C                                            | 4.41136100  | -3.47514700 | -1.91301300 |
| O | 1.07518400  | 1.40052300  | 2.75474200  | H                                            | 4.70096600  | -1.43404200 | -1.30276800 |
| H | 1.77119500  | 0.85315600  | 3.14556400  | C                                            | 2.28428000  | -3.98332800 | -2.94108200 |
| O | 0.45621900  | 2.82475300  | 0.96487800  | H                                            | 0.88950400  | -2.35712700 | -3.08830100 |
| H | -0.38800100 | 2.54123900  | 1.35019300  | C                                            | 3.54967700  | -4.40439800 | -2.50855000 |

|   |             |             |             |                                              |             |             |              |
|---|-------------|-------------|-------------|----------------------------------------------|-------------|-------------|--------------|
| H | 5.39805300  | -3.78475300 | -1.57622700 | H                                            | 4.58412800  | -0.27828400 | 3.38206100   |
| H | 1.60120000  | -4.69557000 | -3.39757000 | H                                            | 3.23100300  | 3.20684700  | 2.61785000   |
| H | 3.85653100  | -5.43982800 | -2.63271700 | H                                            | 3.10767600  | 1.88344200  | 3.77600800   |
| P | 0.80576200  | -0.76238300 | 0.90402300  | H                                            | 0.63206200  | -6.54220700 | 1.12564900   |
| C | 1.02600400  | -2.61000200 | 0.89459700  | H                                            | -0.54318600 | -5.45296300 | 1.86011600   |
| C | -0.77567900 | -0.41326500 | 1.85794400  | H                                            | -3.78896000 | 0.99223400  | 4.01245300   |
| C | 2.19164900  | -0.05706500 | 1.92957200  | H                                            | -2.24705000 | 1.84342200  | 3.93901400   |
| C | 1.20742000  | -3.29361100 | 2.26362600  | H                                            | 5.43507200  | 2.01544300  | 2.92685400   |
| C | -0.10778300 | -3.28809400 | 0.09527700  | H                                            | 4.86231400  | 1.92080500  | 1.26206600   |
| H | 1.95025000  | -2.74096300 | 0.31595000  | O                                            | -0.81038500 | 0.90285600  | -1.95358600  |
| C | -0.65409900 | -0.42436800 | 3.39747900  | C                                            | -7.32414100 | -0.02108300 | -0.09813900  |
| C | -1.47646800 | 0.88441600  | 1.39767900  | C                                            | -6.07678000 | 0.38587000  | -0.58564100  |
| H | -1.42751700 | -1.24667300 | 1.56470500  | C                                            | -5.06601800 | -0.55017300 | -0.88245100  |
| C | 3.57684800  | -0.56549100 | 1.48729200  | C                                            | -5.34959500 | -1.91453800 | -0.67226600  |
| C | 2.14669100  | 1.48541800  | 1.88141000  | C                                            | -6.59390200 | -2.33163200 | -0.18477600  |
| H | 2.02173900  | -0.38116200 | 2.96369700  | C                                            | -7.58510200 | -1.38352100 | 0.10357000   |
| C | 1.50261600  | -4.79251100 | 2.07982800  | H                                            | -8.09079900 | 0.71731500  | 0.12646900   |
| H | 0.28723700  | -3.18854000 | 2.85034000  | H                                            | -5.87650500 | 1.44461100  | -0.73355100  |
| H | 2.01025200  | -2.82061400 | 2.83920200  | H                                            | -4.58241500 | -2.65426900 | -0.88988400  |
| C | 0.16628500  | -4.79091700 | -0.07506000 | H                                            | -6.79295800 | -3.38955600 | -0.02773000  |
| H | -1.06197800 | -3.15880400 | 0.62195800  | H                                            | -8.55273400 | -1.70363400 | 0.48360700   |
| H | -0.21787500 | -2.80387200 | -0.88069900 | B                                            | -3.65684800 | -0.08372000 | -1.40088500  |
| C | -2.04460800 | -0.30495100 | 4.04774300  | O                                            | -3.41615800 | 1.25838100  | -1.57851100  |
| H | -0.03860500 | 0.42392300  | 3.72201900  | H                                            | -2.45521200 | 1.38483000  | -1.80415600  |
| H | -0.15666300 | -1.32949400 | 3.75533800  | O                                            | -2.69402100 | -1.04065200 | -1.64631100  |
| C | -2.86517500 | 1.01199000  | 2.04243600  | H                                            | -1.85248100 | -0.59601600 | -1.91012000  |
| H | -0.86947800 | 1.75324200  | 1.68251400  |                                              |             |             |              |
| H | -1.55957100 | 0.91068100  | 0.31134600  |                                              |             |             |              |
| C | 4.69469000  | 0.05539700  | 2.34094900  | <b>dist-TS1-5</b>                            |             |             |              |
| H | 3.73740100  | -0.29233100 | 0.44084200  | Sum of electronic and thermal Free Energies= |             |             | -3443.687157 |
| H | 3.63142400  | -1.65718500 | 1.54133900  | C                                            | 0.40843200  | -2.29792400 | -0.27518400  |
| C | 3.27340700  | 2.11521400  | 2.71480400  | C                                            | -0.37374300 | -2.90398200 | 0.92082500   |
| H | 2.23860300  | 1.80513200  | 0.83488400  | Ni                                           | 0.06698000  | -0.75062200 | 0.72033400   |
| H | 1.18094800  | 1.85441100  | 2.23850000  | C                                            | -1.53763700 | -2.03680400 | 1.70790500   |
| C | 0.38881200  | -5.48368800 | 1.27813900  | H                                            | -1.78919900 | -2.74308300 | 2.51588100   |
| H | 1.61954000  | -5.26887100 | 3.06074900  | C                                            | -2.76653300 | -1.86455800 | 0.79556900   |
| H | 2.45959400  | -4.90867800 | 1.55226600  | H                                            | -3.09669400 | -2.84362500 | 0.42547000   |
| H | -0.66854500 | -5.25875300 | -0.61108500 | H                                            | -2.48137900 | -1.27497100 | -0.08497400  |
| H | 1.05815200  | -4.91978900 | -0.69999200 | C                                            | -3.93320000 | -1.16106600 | 1.51054500   |
| C | -2.78385200 | 0.95589700  | 3.57491300  | H                                            | -4.28442500 | -1.79870300 | 2.33171900   |
| H | -1.93915700 | -0.29884000 | 5.13946200  | H                                            | -3.55280300 | -0.23772000 | 1.95632000   |
| H | -2.63722400 | -1.19396700 | 3.79093500  | C                                            | -5.06877700 | -0.86001300 | 0.55735300   |
| H | -3.33641800 | 1.94696800  | 1.71718600  | C                                            | -6.00142600 | -1.85150900 | 0.20634400   |
| H | -3.50484700 | 0.19741500  | 1.67636600  | C                                            | -5.17821300 | 0.40016400  | -0.05302000  |
| C | 4.65152800  | 1.58972500  | 2.28871000  | C                                            | -7.01038900 | -1.59367900 | -0.72908900  |
| H | 5.66729000  | -0.31183500 | 1.99186900  | H                                            | -5.93487200 | -2.83422800 | 0.67026300   |

|   |             |             |             |                                              |              |             |             |
|---|-------------|-------------|-------------|----------------------------------------------|--------------|-------------|-------------|
| C | -6.18183700 | 0.66399200  | -0.99255400 | H                                            | -0.99855500  | -0.57964900 | -2.16092600 |
| H | -4.46962400 | 1.18179900  | 0.21083400  | H                                            | 0.32976700   | -0.01027000 | -3.16234200 |
| C | -7.10255800 | -0.33349500 | -1.33617100 | C                                            | -2.75650400  | 2.25361900  | -2.15369200 |
| H | -7.72400200 | -2.37374300 | -0.98473600 | H                                            | -2.13870000  | 1.03184800  | -0.46920900 |
| H | -6.24353800 | 1.64579100  | -1.45661800 | H                                            | -1.60572200  | 2.70386100  | -0.38262700 |
| H | -7.88413800 | -0.13169800 | -2.06470800 | C                                            | 5.24411500   | 0.89413700  | -2.21131600 |
| H | -0.94125800 | -3.75740300 | 0.53764500  | H                                            | 4.32174200   | 1.77514200  | -3.97535100 |
| H | 0.31081900  | -3.27481600 | 1.68692000  | H                                            | 3.83816600   | 0.10963200  | -3.65825800 |
| H | -0.17461300 | -2.33135900 | -1.19956400 | H                                            | 5.70636700   | -0.11661400 | -0.33956700 |
| C | 1.78989000  | -2.78944300 | -0.49740700 | H                                            | 4.69824500   | -1.05259800 | -1.43676000 |
| C | 2.21811800  | -3.13024300 | -1.79658800 | C                                            | 0.64946600   | 4.86154600  | 2.29523400  |
| C | 2.71559600  | -2.93317800 | 0.55877000  | H                                            | 1.62729800   | 5.80946200  | 0.59778300  |
| C | 3.50862200  | -3.61592400 | -2.03132100 | H                                            | 2.62739100   | 4.63362400  | 1.44815900  |
| H | 1.52619600  | -3.01937500 | -2.62934800 | H                                            | -0.17487100  | 3.50311500  | 3.78301200  |
| C | 4.00349500  | -3.41700100 | 0.32754300  | H                                            | 1.51901000   | 3.21031900  | 3.39556100  |
| H | 2.42384700  | -2.64556400 | 1.56547600  | C                                            | -2.96466200  | 1.12269800  | -3.16896100 |
| C | 4.40705700  | -3.76949300 | -0.96882300 | H                                            | -1.77388500  | -0.14840600 | -4.47441400 |
| H | 3.81202000  | -3.87419400 | -3.04319500 | H                                            | -1.21435800  | 1.52077800  | -4.38079000 |
| H | 4.69964700  | -3.51187400 | 1.15762800  | H                                            | -3.70906200  | 2.52713200  | -1.68586200 |
| H | 5.41134300  | -4.14498100 | -1.14795400 | H                                            | -2.39327000  | 3.15004400  | -2.67546400 |
| P | 0.83461100  | 0.90623200  | -0.38337500 | H                                            | 6.11723600   | 0.50593500  | -2.74981500 |
| C | 2.43212600  | 0.59851700  | -1.29959300 | H                                            | 5.53006900   | 1.87654300  | -1.80936600 |
| C | 1.12799000  | 2.36459300  | 0.75747000  | H                                            | 0.98089200   | 5.61115300  | 3.02395400  |
| C | -0.39432000 | 1.43485100  | -1.68329300 | H                                            | -0.34851700  | 5.17040900  | 1.95358900  |
| C | 2.80297900  | 1.56804100  | -2.44141600 | H                                            | -3.66383600  | 1.43868800  | -3.95247300 |
| C | 3.61339100  | 0.44009400  | -0.31885500 | H                                            | -3.42505300  | 0.26500200  | -2.65991100 |
| H | 2.25750200  | -0.38727900 | -1.74740400 | O                                            | -1.12193900  | -0.81346500 | 2.27526400  |
| C | 1.21207400  | 3.74625700  | 0.07536800  | C                                            | 1.39919200   | -0.24819100 | 4.51090800  |
| C | 0.13706800  | 2.40070800  | 1.94376300  | C                                            | 2.48801100   | -0.14560600 | 3.44165800  |
| H | 2.11397600  | 2.14341700  | 1.18498600  | H                                            | 1.85794200   | -0.36847500 | 5.49966500  |
| C | -0.61522200 | 0.29448900  | -2.70013100 | H                                            | 0.81795600   | 0.68647000  | 4.53893900  |
| C | -1.74232200 | 1.86241700  | -1.06621700 | H                                            | 3.12677700   | 0.72990500  | 3.61103500  |
| H | 0.03722400  | 2.29906100  | -2.20416100 | H                                            | 3.11714700   | -1.04244500 | 3.44277600  |
| C | 4.06157100  | 1.07126400  | -3.17551200 | H                                            | 2.03784400   | -0.05307100 | 2.44848600  |
| H | 3.00144000  | 2.56700700  | -2.03730900 | O                                            | 0.53798400   | -1.36994000 | 4.31334600  |
| H | 1.98121500  | 1.67096800  | -3.15673800 | H                                            | -0.06200600  | -1.16009900 | 3.53884100  |
| C | 4.87515600  | -0.04245000 | -1.05145100 |                                              |              |             |             |
| H | 3.83025000  | 1.40537500  | 0.15629100  |                                              |              |             |             |
| H | 3.35169400  | -0.26291700 | 0.47737000  | <b>dist-TS1-6</b>                            |              |             |             |
| C | 1.60616900  | 4.83159500  | 1.09393200  | Sum of electronic and thermal Free Energies= | -3696.920783 |             |             |
| H | 0.24057700  | 4.00209300  | -0.36438600 | C                                            | 0.97376700   | -0.59140300 | -2.39841100 |
| H | 1.93536300  | 3.73595800  | -0.74404800 | C                                            | -0.32470400  | -1.34253000 | -2.46865400 |
| C | 0.54726600  | 3.47934400  | 2.95797700  | Ni                                           | 0.24041800   | -0.44926700 | -0.65895200 |
| H | -0.87455300 | 2.61658500  | 1.58267600  | C                                            | -1.68467500  | -1.16415100 | -1.22320800 |
| H | 0.08357200  | 1.42228900  | 2.42695400  | H                                            | -2.18281300  | -2.07881800 | -1.54699700 |
| C | -1.62620300 | 0.69305400  | -3.78683100 | C                                            | -2.48781900  | 0.09605000  | -1.55262500 |

|   |             |             |             |   |             |             |             |
|---|-------------|-------------|-------------|---|-------------|-------------|-------------|
| H | -2.78438100 | 0.07496800  | -2.60643300 | C | 4.36688700  | -2.16045900 | 1.40646200  |
| H | -1.85637100 | 0.98151400  | -1.41843900 | H | 2.59751800  | -1.38549200 | 2.38253200  |
| C | -3.73522700 | 0.23813500  | -0.65844800 | H | 2.30792400  | -1.98039000 | 0.74826300  |
| H | -4.41910800 | -0.59611600 | -0.84749600 | C | 0.79917900  | 2.39662100  | 4.45174400  |
| H | -3.41850900 | 0.15918300  | 0.38467600  | H | 1.00904400  | 3.27103600  | 2.48963200  |
| C | -4.42655900 | 1.56254000  | -0.89365500 | H | 2.42859100  | 2.38289400  | 3.02293300  |
| C | -5.53281300 | 1.67036200  | -1.75098700 | C | -1.29579900 | 1.18697700  | 3.69324700  |
| C | -3.93273300 | 2.73232000  | -0.28894700 | H | -1.09411300 | 2.05324400  | 1.72878300  |
| C | -6.13301900 | 2.91215800  | -1.99855400 | H | -1.14766500 | 0.30236700  | 1.71291200  |
| H | -5.92852900 | 0.77542100  | -2.22772600 | C | 3.05202200  | 3.86509000  | -1.93684400 |
| C | -4.52690700 | 3.97507800  | -0.53256900 | H | 2.36580700  | 1.83305200  | -2.15595900 |
| H | -3.07601000 | 2.66540500  | 0.37950800  | H | 3.76722900  | 1.99480900  | -1.10783800 |
| C | -5.63132500 | 4.06985500  | -1.39090900 | C | 0.76272700  | 4.58136300  | -1.13365800 |
| H | -6.99151700 | 2.97516700  | -2.66328300 | H | 0.01801200  | 2.55072500  | -1.29785100 |
| H | -4.13221400 | 4.86774300  | -0.05267000 | H | -0.13899900 | 3.24641200  | 0.30892400  |
| H | -6.09654200 | 5.03409000  | -1.58079800 | C | 5.42613800  | -1.36808400 | 2.18753600  |
| H | -0.94582100 | -0.98956100 | -3.28888600 | H | 6.29898400  | 0.62551900  | 2.22758500  |
| H | -0.21287600 | -2.42328100 | -2.49728400 | H | 5.96329000  | 0.01392800  | 0.60766600  |
| H | 0.97438900  | 0.33978000  | -2.96697700 | H | 4.23128100  | -3.15570300 | 1.84698700  |
| C | 2.26193000  | -1.32656200 | -2.47355500 | H | 4.71200100  | -2.31323700 | 0.37666200  |
| C | 3.39808400  | -0.71031700 | -3.03699200 | C | -0.73662000 | 2.37809100  | 4.48569300  |
| C | 2.41097500  | -2.63871600 | -1.97355000 | H | 1.18022000  | 3.28896200  | 4.96309100  |
| C | 4.63328600  | -1.36393400 | -3.08028600 | H | 1.18770600  | 1.52696200  | 4.99956800  |
| H | 3.31437400  | 0.29161300  | -3.44950000 | H | -2.39188000 | 1.22480300  | 3.66902000  |
| C | 3.64150800  | -3.29548300 | -2.02266400 | H | -1.02200400 | 0.25118600  | 4.20170900  |
| H | 1.55599800  | -3.14419200 | -1.53429000 | C | 1.73180600  | 4.54707700  | -2.32382600 |
| C | 4.76484600  | -2.66168200 | -2.57129500 | H | 3.71924300  | 3.80257900  | -2.80497500 |
| H | 5.49255600  | -0.85983800 | -3.51666000 | H | 3.56951700  | 4.47267400  | -1.18149000 |
| H | 3.72791000  | -4.30209600 | -1.62027400 | H | -0.19780800 | 5.01782700  | -1.43291400 |
| H | 5.72462500  | -3.17118100 | -2.60109600 | H | 1.17491900  | 5.22944900  | -0.34780200 |
| P | 1.52098200  | 0.80570700  | 0.55452600  | H | 6.39003900  | -1.89009700 | 2.15267100  |
| C | 3.18151500  | 0.00318700  | 0.80885900  | H | 5.13314600  | -1.31317300 | 3.24551800  |
| C | 0.79736200  | 1.12225000  | 2.26078800  | H | -1.09310700 | 2.35016700  | 5.52248600  |
| C | 1.85781300  | 2.49356400  | -0.16457400 | H | -1.11606000 | 3.31054900  | 4.04446300  |
| C | 4.22048800  | 0.79169000  | 1.62853100  | H | 1.92031800  | 5.56304000  | -2.69092500 |
| C | 3.01784400  | -1.42506000 | 1.36963800  | H | 1.26831200  | 3.99077600  | -3.15075200 |
| H | 3.55739100  | -0.10136400 | -0.21767400 | O | -1.38184300 | -1.22239200 | 0.13600500  |
| C | 1.33620300  | 2.36153600  | 3.00916200  | B | -1.28709600 | -2.67085200 | 0.86172700  |
| C | -0.74815000 | 1.15635500  | 2.25769200  | C | -2.78468300 | -3.27861600 | 0.76057900  |
| H | 1.09625200  | 0.22706800  | 2.82249200  | C | -3.85776700 | -2.67868100 | 1.44959900  |
| C | 2.81057800  | 2.45467500  | -1.37418700 | C | -3.08604500 | -4.40013900 | -0.03398300 |
| C | 0.52914300  | 3.17707800  | -0.55414700 | C | -5.16552000 | -3.16952300 | 1.35730300  |
| H | 2.33701300  | 3.08562000  | 0.62450000  | H | -3.67961100 | -1.79506900 | 2.06249300  |
| C | 5.57255100  | 0.05764600  | 1.63381300  | C | -4.39104800 | -4.90452100 | -0.13865400 |
| H | 3.87243300  | 0.88730000  | 2.66373500  | H | -2.28103700 | -4.88658900 | -0.58122200 |
| H | 4.34447700  | 1.80694700  | 1.23636600  | C | -5.43848600 | -4.28951800 | 0.55849000  |

|   |             |             |             |
|---|-------------|-------------|-------------|
| H | -5.97176100 | -2.68011900 | 1.90068500  |
| H | -4.59159300 | -5.77332400 | -0.76317900 |
| H | -6.45297400 | -4.67466700 | 0.48048100  |
| O | -0.80608600 | -2.35466500 | 2.19774600  |
| H | -1.43543500 | -1.79036000 | 2.66889400  |
| O | -0.31379800 | -3.48296100 | 0.16146300  |
| H | 0.56054200  | -3.20375600 | 0.47486400  |

|    |             |            |             |
|----|-------------|------------|-------------|
| H  | -3.13167600 | 2.38860600 | -0.30556600 |
| C  | -1.50793900 | 0.46293000 | 1.47936000  |
| C  | -1.36552000 | 1.53436500 | 0.61220800  |
| H  | -0.97801400 | 0.53273900 | 2.42652200  |
| H  | -0.75916600 | 2.36907700 | 0.96109200  |
| Ni | 0.00000000  | 0.00001700 | -0.00003100 |

**cat-toluene**

Sum of electronic and thermal Free Energies= -2131.990027

|   |             |             |             |
|---|-------------|-------------|-------------|
| C | 1.50791900  | 0.46265500  | -1.47943400 |
| C | 1.36548800  | 1.53425500  | -0.61247600 |
| H | 0.97802200  | 0.53230600  | -2.42662500 |
| C | 2.61397500  | -0.58565400 | -1.42400000 |
| H | 3.52770600  | -0.13790500 | -1.02402700 |
| H | 2.85884200  | -0.89831500 | -2.44521600 |
| C | 2.22526000  | 1.83721400  | 0.60103400  |
| H | 3.13163500  | 2.38869700  | 0.30513600  |
| H | 1.65476700  | 2.51551900  | 1.24583600  |
| H | 0.75915000  | 2.36890800  | -0.96153000 |
| C | 2.61394200  | 0.58565900  | 1.42409900  |
| H | 3.52767700  | 0.13792200  | 1.02412400  |
| H | 2.85880000  | 0.89830900  | 2.44532100  |
| C | 2.22530300  | -1.83720500 | -0.60092300 |
| H | 1.65484300  | -2.51553600 | -1.24572700 |
| H | 3.13168300  | -2.38866000 | -0.30499000 |
| C | 1.50789500  | -0.46265700 | 1.47951300  |
| C | 1.36549400  | -1.53425200 | 0.61256100  |
| H | 0.97792400  | -0.53226800 | 2.42666400  |
| H | 0.75910800  | -2.36888500 | 0.96157500  |
| C | -1.50788100 | -0.46293900 | -1.47941100 |
| C | -1.36546100 | -1.53437300 | -0.61225300 |
| H | -0.97794400 | -0.53274500 | -2.42656700 |
| C | -2.61394700 | 0.58537200  | -1.42419700 |
| H | -3.52767900 | 0.13769400  | -1.02414600 |
| H | -2.85880400 | 0.89782900  | -2.44547700 |
| C | -2.22526400 | -1.83711300 | 0.60128900  |
| H | -3.13162800 | -2.38865400 | 0.30546600  |
| H | -1.65478600 | -2.51529900 | 1.24623100  |
| H | -0.75908900 | -2.36907600 | -0.96112700 |
| C | -2.61397400 | -0.58541000 | 1.42411500  |
| H | -3.52770600 | -0.13775600 | 1.02404000  |
| H | -2.85885000 | -0.89787300 | 2.44538900  |
| C | -2.22529200 | 1.83708400  | -0.60136100 |
| H | -1.65480600 | 2.51528100  | -1.24628400 |

**COD-toluene**

Sum of electronic and thermal Free Energies= -311.927869

|   |             |             |             |
|---|-------------|-------------|-------------|
| C | 1.74173800  | 0.67097200  | -0.12003300 |
| C | 1.74162100  | -0.67125300 | -0.12003100 |
| H | 2.58770400  | 1.17325200  | -0.58994200 |
| C | 0.65437500  | 1.57158200  | 0.42915400  |
| H | 1.04423400  | 2.59313300  | 0.48485000  |
| H | 0.40161700  | 1.27896700  | 1.45560100  |
| C | 0.65411200  | -1.57167500 | 0.42917000  |
| H | 1.04380700  | -2.59328700 | 0.48489200  |
| H | 0.40139200  | -1.27899400 | 1.45560600  |
| H | 2.58749800  | -1.17368100 | -0.58994200 |
| C | -0.65417100 | -1.57210400 | -0.42848300 |
| H | -0.40141400 | -1.28071400 | -1.45529700 |
| H | -1.04398000 | -2.59373700 | -0.48299700 |
| C | -0.65390900 | 1.57219800  | -0.42849600 |
| H | -1.04355500 | 2.59389100  | -0.48303300 |
| H | -0.40119400 | 1.28074300  | -1.45530200 |
| C | -1.74185100 | -0.67097800 | 0.11933500  |
| C | -1.74173500 | 0.67125900  | 0.11933500  |
| H | -2.58869300 | -1.17302000 | 0.58792500  |
| H | -2.58848800 | 1.17344700  | 0.58792900  |

**PCy<sub>3</sub>-toluene**

Sum of electronic and thermal Free Energies= -1046.840306

|   |             |             |             |
|---|-------------|-------------|-------------|
| P | 0.01756900  | -0.12631400 | -1.07963900 |
| C | -1.50015700 | -1.05884500 | -0.46021800 |
| C | -1.76944300 | -1.07188500 | 1.05669800  |
| C | -2.76238000 | -0.60129100 | -1.22456500 |
| H | -1.30509400 | -2.09392500 | -0.77570600 |
| C | -2.98106500 | -1.95513200 | 1.40525200  |
| H | -1.97230500 | -0.04848400 | 1.39706000  |
| H | -0.88590300 | -1.41880200 | 1.60453100  |
| C | -3.98077100 | -1.47381300 | -0.87390900 |
| H | -2.99204400 | 0.44311400  | -0.97074000 |
| H | -2.57871100 | -0.62824300 | -2.30520200 |
| C | -4.23627600 | -1.50756200 | 0.64076200  |

|   |             |             |             |   |             |             |             |
|---|-------------|-------------|-------------|---|-------------|-------------|-------------|
| H | -3.16416500 | -1.93015100 | 2.48689600  | C | 0.51636300  | -0.22162400 | -0.00004500 |
| H | -2.75190400 | -2.99902800 | 1.14782100  | C | 0.01034300  | 1.09502600  | -0.00006000 |
| H | -4.86882100 | -1.10474500 | -1.40204000 | C | -1.36432500 | 1.33313800  | -0.00001800 |
| H | -3.80276900 | -2.49725800 | -1.23313100 | C | -2.27118100 | 0.26308000  | 0.00003600  |
| H | -5.07985900 | -2.17025800 | 0.87006000  | H | -2.47807500 | -1.88685000 | 0.00007800  |
| H | -4.52366600 | -0.50202700 | 0.98023500  | H | -0.03967200 | -2.30956800 | 0.00000200  |
| C | -0.20864200 | 1.59314300  | -0.30574900 | H | 0.69270000  | 1.94060600  | -0.00012000 |
| C | 0.30248300  | 1.82007300  | 1.13298700  | H | -1.73354000 | 2.35603400  | -0.00003500 |
| C | 0.35392400  | 2.68322800  | -1.24697300 | H | -3.34172900 | 0.45254500  | 0.00006600  |
| H | -1.30033300 | 1.72457100  | -0.28761100 | C | 1.95899600  | -0.53233100 | -0.00007500 |
| C | -0.04535000 | 3.23317600  | 1.63551800  | H | 2.19749400  | -1.59631700 | -0.00025000 |
| H | 1.39261800  | 1.70057300  | 1.16163400  | C | 2.98383900  | 0.33712500  | 0.00010400  |
| H | -0.10994800 | 1.07352800  | 1.81767600  | H | 4.01131400  | -0.01659300 | 0.00005900  |
| C | 0.02454500  | 4.09881200  | -0.74277500 | H | 2.84371100  | 1.41541800  | 0.00030700  |
| H | 1.44460100  | 2.57250500  | -1.32424400 |   |             |             |             |
| H | -0.04232000 | 2.54306800  | -2.25918000 |   |             |             |             |
| C | 0.51089900  | 4.31504500  | 0.69798500  |   |             |             |             |
| H | 0.34395000  | 3.37227300  | 2.65204400  |   |             |             |             |
| H | -1.13820200 | 3.33502400  | 1.69967800  |   |             |             |             |
| H | 0.46763300  | 4.84697200  | -1.41197100 |   |             |             |             |
| H | -1.06422900 | 4.24731900  | -0.78131300 |   |             |             |             |
| H | 0.22389900  | 5.31274600  | 1.05255800  |   |             |             |             |
| H | 1.60953200  | 4.27685400  | 0.71757300  |   |             |             |             |
| C | 1.41650800  | -0.89216800 | -0.07613000 |   |             |             |             |
| C | 1.47559100  | -2.42489600 | -0.24965000 |   |             |             |             |
| C | 2.76173700  | -0.26330700 | -0.50381500 |   |             |             |             |
| H | 1.26435800  | -0.68350600 | 0.99036300  |   |             |             |             |
| C | 2.66586400  | -3.03628200 | 0.51130800  |   |             |             |             |
| H | 1.56255000  | -2.66901900 | -1.31810400 |   |             |             |             |
| H | 0.54933800  | -2.88917900 | 0.10549300  |   |             |             |             |
| C | 3.94661900  | -0.86768300 | 0.26771500  |   |             |             |             |
| H | 2.90781000  | -0.43082900 | -1.57994600 |   |             |             |             |
| H | 2.74453800  | 0.82257500  | -0.36061300 |   |             |             |             |
| C | 3.99860500  | -2.39335900 | 0.10078700  |   |             |             |             |
| H | 2.69652700  | -4.11985600 | 0.34182600  |   |             |             |             |
| H | 2.51265000  | -2.89056000 | 1.59013100  |   |             |             |             |
| H | 4.88495200  | -0.41371500 | -0.07455900 |   |             |             |             |
| H | 3.84714600  | -0.62176300 | 1.33460000  |   |             |             |             |
| H | 4.82253500  | -2.81562700 | 0.68919800  |   |             |             |             |
| H | 4.20594300  | -2.63296800 | -0.95180000 |   |             |             |             |

### R2-toluene

Sum of electronic and thermal Free Energies= -424.132666

|   |             |             |             |
|---|-------------|-------------|-------------|
| C | -2.53444900 | 1.20941300  | 0.08430500  |
| C | -1.16268300 | 1.20617000  | -0.19309600 |
| C | -0.45772000 | -0.00003600 | -0.33530200 |
| C | -1.16266200 | -1.20622500 | -0.19285500 |
| C | -2.53442900 | -1.20943500 | 0.08454800  |
| C | -3.22581500 | -0.00000300 | 0.22546800  |
| H | -3.06384000 | 2.15401400  | 0.18570900  |
| H | -0.63411200 | 2.15129400  | -0.30636200 |
| H | -0.63407500 | -2.15136300 | -0.30592800 |
| H | -3.06380300 | -2.15402500 | 0.18614200  |
| H | -4.29221700 | 0.00000900  | 0.43766200  |
| C | 1.03529700  | -0.00004400 | -0.58744300 |
| C | 1.83225400  | 0.00021100  | 0.72580200  |
| H | 1.32428600  | 0.87609400  | -1.17654400 |
| H | 1.32433100  | -0.87637700 | -1.17623000 |
| C | 3.33050300  | 0.00023000  | 0.54957400  |
| H | 1.57561800  | 0.87095100  | 1.34679400  |
| H | 1.57565800  | -0.87032100 | 1.34710400  |
| H | 3.91294900  | 0.00010800  | 1.49716200  |
| O | 3.90667800  | -0.00025800 | -0.52519000 |

### PhB(OH)<sub>2</sub>-toluene

Sum of electronic and thermal Free Energies= -408.249158

|   |             |             |             |
|---|-------------|-------------|-------------|
| C | -1.93270200 | -1.22247400 | 0.00000100  |
| C | -0.53495800 | -1.20118200 | 0.00000700  |
| C | 0.17938700  | 0.01451400  | 0.00000500  |
| C | -0.56591400 | 1.21078600  | -0.00000600 |

### R1-toluene

Sum of electronic and thermal Free Energies= -309.586462

|   |             |             |             |
|---|-------------|-------------|-------------|
| C | -1.78560200 | -1.04849200 | 0.00004200  |
| C | -0.40713400 | -1.28513400 | -0.00000200 |

|   |             |             |             |   |            |             |             |
|---|-------------|-------------|-------------|---|------------|-------------|-------------|
| C | -1.96470800 | 1.19936300  | -0.00001300 | H | 4.69719000 | -0.99670500 | -0.66821400 |
| C | -2.65150400 | -0.02037700 | -0.00001000 | C | 3.08639300 | 1.87743400  | -2.90113100 |
| H | -2.46272600 | -2.17211300 | 0.00000400  | H | 1.85522000 | 0.09098300  | -2.95915900 |
| H | 0.01710300  | -2.13745900 | 0.00001500  | H | 1.25525500 | 1.34700600  | -1.87085900 |
| H | -0.06320600 | 2.17774300  | -0.00001000 | C | 4.45141200 | 1.28535900  | -3.28187600 |
| H | -2.51780000 | 2.13568200  | -0.00002100 | H | 6.07852500 | 0.16982900  | -2.36207500 |
| H | -3.73898700 | -0.03343600 | -0.00001500 | H | 5.33095300 | 1.36877900  | -1.30297400 |
| B | 1.74822300  | -0.00116500 | 0.00001400  | H | 2.58879900 | 2.29075300  | -3.78803200 |
| O | 2.54090500  | 1.12888600  | 0.00001300  | H | 3.24110100 | 2.71053300  | -2.20799100 |
| H | 2.03722600  | 1.95536400  | 0.00002600  | H | 5.10046000 | 2.07028500  | -3.68969500 |
| O | 2.39095000  | -1.21693800 | -0.00001000 | H | 4.32149700 | 0.53747500  | -4.07788700 |
| H | 3.35483600  | -1.09932500 | -0.00001000 | C | 1.05696600 | -2.28496100 | -1.10311900 |

### B(OH)<sub>3</sub>-toluene

Sum of electronic and thermal Free Energies= -252.526964

|   |             |             |             |   |             |             |             |
|---|-------------|-------------|-------------|---|-------------|-------------|-------------|
| B | -0.00001400 | 0.00003300  | 0.00014700  | H | 2.90630700  | -3.42601000 | -1.27183300 |
| O | 1.01636000  | 0.92859100  | -0.00001000 | H | 2.61118900  | -2.33382400 | -2.61947700 |
| H | 0.66749700  | 1.83301800  | 0.00030500  | C | -0.37478300 | -4.40629100 | -1.12357000 |
| O | -1.31242100 | 0.41585900  | -0.00004100 | H | 0.93209700  | -3.78475200 | 0.45803300  |
| H | -1.92112200 | -0.33859700 | -0.00000700 | H | -0.50853000 | -2.79194300 | 0.31752600  |
| O | 0.29605300  | -1.34445900 | -0.00007400 | C | 0.69795400  | -5.15274700 | -1.92675000 |
| H | 1.25376700  | -1.49451600 | -0.00003200 | H | 2.31686700  | -4.69316500 | -3.30535200 |
|   |             |             |             | H | 0.86380500  | -3.72926600 | -3.53856900 |
|   |             |             |             | H | -0.93112400 | -5.10111500 | -0.48204300 |
|   |             |             |             | H | -1.10439300 | -3.96250500 | -1.81436600 |

### 1-toluene

Sum of electronic and thermal Free Energies= -3911.411866

|    |            |             |             |   |             |             |             |
|----|------------|-------------|-------------|---|-------------|-------------|-------------|
| Ni | 0.01790900 | 0.66503300  | 0.71019100  | H | 0.24060400  | -5.91619300 | -2.56796800 |
| C  | 2.07239500 | 2.82836600  | 1.11165600  | H | 1.36584100  | -5.68087900 | -1.23138100 |
| C  | 3.44396000 | 2.94278000  | 1.42586500  | C | 2.49613800  | -1.61407500 | 1.39291100  |
| C  | 1.57709400 | 3.67256600  | 0.09177000  | C | 3.68347600  | -0.80359900 | 1.95722900  |
| C  | 4.27516600 | 3.85288500  | 0.76523000  | C | 1.50280300  | -1.89762300 | 2.54765500  |
| H  | 3.86408200 | 2.31622000  | 2.20940100  | H | 2.89061000  | -2.57223400 | 1.02495500  |
| C  | 2.39948200 | 4.59367900  | -0.55684900 | C | 4.37173700  | -1.54539200 | 3.11604000  |
| H  | 0.53465000 | 3.58916400  | -0.19973500 | H | 3.31934600  | 0.15925300  | 2.32178300  |
| C  | 3.75941200 | 4.69288000  | -0.22856800 | H | 4.42101800  | -0.57959400 | 1.18580400  |
| H  | 5.32792600 | 3.91160400  | 1.03457100  | C | 2.17304400  | -2.63147500 | 3.71992300  |
| H  | 1.98328300 | 5.22682400  | -1.33796800 | H | 1.09273000  | -0.93900900 | 2.89071900  |
| H  | 4.40236900 | 5.40312000  | -0.74263900 | H | 0.64729300  | -2.47914200 | 2.20062000  |
| P  | 1.57281500 | -0.79594600 | -0.04287300 | C | 3.38692800  | -1.85739400 | 4.25126400  |
| C  | 2.86076800 | 0.15521600  | -1.03135700 | H | 5.20839400  | -0.94295000 | 3.49158200  |
| C  | 4.19701800 | -0.47351400 | -1.48719700 | H | 4.80337200  | -2.48407600 | 2.73989000  |
| C  | 2.16553400 | 0.84801800  | -2.22403500 | H | 1.44121300  | -2.79260400 | 4.52146200  |
| H  | 3.11312900 | 0.94884200  | -0.31920800 | H | 2.49623400  | -3.62737800 | 3.38378600  |
| C  | 5.11749500 | 0.61282300  | -2.07123500 | H | 3.88546400  | -2.42320800 | 5.04796800  |
| H  | 4.03084400 | -1.21878400 | -2.26688000 | H | 3.04411900  | -0.91375300 | 4.69876000  |
|    |            |             |             | P | -2.08337600 | 0.30275100  | 0.06357200  |

|   |             |             |             |    |             |             |             |
|---|-------------|-------------|-------------|----|-------------|-------------|-------------|
| C | -2.32062300 | -0.82683500 | -1.42803900 | H  | -4.60408600 | -2.73065600 | 2.34036700  |
| C | -3.76094100 | -1.22873700 | -1.80222800 | H  | -3.88200400 | 0.17467400  | 4.72385800  |
| C | -1.59583600 | -0.24658600 | -2.66145100 | H  | -4.99889000 | -0.33755000 | 3.46006800  |
| H | -1.78804900 | -1.73979500 | -1.14430200 | H  | -4.25122600 | -2.32354600 | 4.75871700  |
| C | -3.77030500 | -2.22652800 | -2.97479600 | H  | -2.56383300 | -1.90268500 | 4.47220200  |
| H | -4.32900200 | -0.33817300 | -2.09846700 | C  | 1.20443300  | 1.88137400  | 1.84299100  |
| H | -4.28155500 | -1.66625900 | -0.94340400 | C  | -0.18911100 | 2.11520500  | 2.03115500  |
| C | -1.60786600 | -1.22980500 | -3.84376500 | H  | -0.64426300 | 1.74460500  | 2.94912800  |
| H | -2.08960600 | 0.68017600  | -2.98170200 | H  | -0.62068300 | 3.05340300  | 1.69410700  |
| H | -0.57167900 | 0.02997600  | -2.39594300 | H  | 1.72132900  | 1.32103300  | 2.62039700  |
| C | -3.03864600 | -1.65983400 | -4.20107800 |    |             |             |             |
| H | -4.80411600 | -2.48592400 | -3.23490500 |    |             |             |             |
| H | -3.28227700 | -3.15898600 | -2.65829500 |    |             |             |             |
| H | -1.11721400 | -0.77305500 | -4.71216800 |    |             |             |             |
| H | -1.02043800 | -2.12057000 | -3.58504800 | Ni | 0.02095600  | -0.64252300 | -0.29425400 |
| H | -3.02334500 | -2.39913600 | -5.01119200 | C  | 1.20978700  | -3.09886600 | 0.28004400  |
| H | -3.59318800 | -0.78890200 | -4.57857300 | H  | 1.22730300  | -4.19772100 | 0.31914800  |
| C | -3.17493900 | 1.76976900  | -0.48624400 | C  | -0.22329400 | -2.56354600 | 0.03585700  |
| C | -4.66479500 | 1.73657800  | -0.08028900 | H  | -0.80010600 | -2.82830900 | 0.91769600  |
| C | -2.57094700 | 3.14025100  | -0.13867800 | C  | 7.28856600  | -0.02370800 | 0.39607600  |
| H | -3.14921300 | 1.69458800  | -1.58043500 | C  | 5.93786900  | -0.38759500 | 0.43522400  |
| C | -5.44579000 | 2.87993700  | -0.75444800 | C  | 5.55243800  | -1.66981600 | 0.86183500  |
| H | -4.75615400 | 1.83927800  | 1.00785400  | C  | 6.55047900  | -2.57793900 | 1.24856700  |
| H | -5.12795600 | 0.78218300  | -0.34508300 | C  | 7.90272700  | -2.21809500 | 1.20979600  |
| C | -3.34208900 | 4.28512700  | -0.81412000 | C  | 8.27656400  | -0.93839700 | 0.78178900  |
| H | -2.59328400 | 3.28327500  | 0.94783300  | H  | 7.56890900  | 0.97497900  | 0.06920000  |
| H | -1.51834700 | 3.16041600  | -0.43488000 | H  | 5.17688700  | 0.33300700  | 0.13912100  |
| C | -4.83140600 | 4.25184000  | -0.44099100 | H  | 6.26692800  | -3.57338700 | 1.58673000  |
| H | -6.49471900 | 2.84894200  | -0.43397200 | H  | 8.66262100  | -2.93317700 | 1.51675100  |
| H | -5.44423200 | 2.72175500  | -1.84248700 | H  | 9.32606500  | -0.65517300 | 0.75415500  |
| H | -2.89896400 | 5.24866400  | -0.53353800 | C  | 4.09324700  | -2.07055100 | 0.85275100  |
| H | -3.23902700 | 4.19601500  | -1.90527000 | C  | 3.67395500  | -2.72663400 | -0.48310300 |
| H | -5.37782500 | 5.04378600  | -0.96781000 | H  | 3.47538400  | -1.18374500 | 1.02529100  |
| H | -4.93713400 | 4.45602600  | 0.63395600  | H  | 3.88744700  | -2.75736600 | 1.68024600  |
| C | -3.11284100 | -0.54118100 | 1.39455200  | C  | 2.18046600  | -2.62649800 | -0.79130500 |
| C | -2.69071200 | -2.00097400 | 1.64601700  | H  | 4.21732700  | -2.24773600 | -1.30707600 |
| C | -3.04329800 | 0.23664800  | 2.72327600  | H  | 3.97000200  | -3.78212300 | -0.49637700 |
| H | -4.15515200 | -0.55154300 | 1.05701400  | H  | 1.96596100  | -3.13478200 | -1.73716600 |
| C | -3.57443500 | -2.66107600 | 2.71911700  | O  | 1.82215700  | -1.21221200 | -0.95065000 |
| H | -1.64512600 | -2.01288500 | 1.97797500  | C  | 2.45624600  | 5.60271600  | -1.58653200 |
| H | -2.74429100 | -2.59150200 | 0.72558600  | C  | 2.51991000  | 4.26805000  | -1.16835400 |
| C | -3.95150700 | -0.39544900 | 3.78921500  | C  | 1.46434500  | 3.37003900  | -1.41821100 |
| H | -2.00697100 | 0.21673800  | 3.07603300  | C  | 0.34016400  | 3.85946900  | -2.11123100 |
| H | -3.29774600 | 1.29202200  | 2.57929400  | C  | 0.26496400  | 5.19116600  | -2.53444200 |
| C | -3.57032600 | -1.86381800 | 4.03196900  | C  | 1.32552500  | 6.06864900  | -2.27060200 |
| H | -3.23460800 | -3.68914900 | 2.89636500  | H  | 3.28178200  | 6.28089900  | -1.37885500 |

**dist-4-toluene**

Sum of electronic and thermal Free Energies= -3696.938084





|   |             |             |             |                                              |              |             |             |
|---|-------------|-------------|-------------|----------------------------------------------|--------------|-------------|-------------|
| H | 9.50204100  | 0.92183900  | -0.01940400 | C                                            | -4.47783400  | 1.40391400  | 3.35964400  |
| C | 4.42413200  | -0.62817500 | 1.08071700  | H                                            | -4.42873500  | 0.06220000  | 1.67248600  |
| C | 4.04562900  | -1.88746900 | 0.26828600  | H                                            | -4.35790600  | 1.76070200  | 1.23136700  |
| H | 3.72965900  | 0.18066400  | 0.83223600  | C                                            | -2.44587500  | 0.29673100  | 4.36850200  |
| H | 4.29724700  | -0.82844000 | 2.14958000  | H                                            | -2.27731600  | -1.08037700 | 2.70602300  |
| C | 2.54339600  | -2.07829500 | 0.06431900  | H                                            | -0.84685100  | -0.08127200 | 2.96251000  |
| H | 4.51191400  | -1.83161000 | -0.72302500 | C                                            | -3.91761400  | -0.31023400 | -3.28099400 |
| H | 4.45590000  | -2.78385500 | 0.74796300  | H                                            | -1.83972500  | -0.29466200 | -2.63104600 |
| H | 2.36441900  | -3.00546900 | -0.48974200 | H                                            | -2.58783800  | 1.28337900  | -2.66320300 |
| O | 2.02664800  | -0.96624200 | -0.74352200 | C                                            | -4.57065400  | -1.92318100 | -1.44342500 |
| B | 1.30466600  | 1.67260400  | -2.18910100 | H                                            | -2.52206400  | -1.98877900 | -0.79423100 |
| O | 2.52415000  | 1.81257200  | -1.48264400 | H                                            | -3.63382000  | -1.53029700 | 0.47696800  |
| H | 2.55786700  | 1.10546600  | -0.81927400 | C                                            | -1.15758900  | 5.43690900  | -0.12789600 |
| O | 0.37684600  | 0.75185000  | -1.92828900 | H                                            | -3.22931500  | 5.45748800  | -0.79551700 |
| H | 2.23438300  | -1.05277600 | -1.69090800 | H                                            | -2.10856000  | 4.69828700  | -1.92585400 |
| C | -0.48118700 | -3.02178100 | 0.26799300  | H                                            | 0.89244400   | 4.95046300  | 0.42079400  |
| C | -1.38762000 | -3.81923700 | 0.99491800  | H                                            | 0.41963000   | 4.39046300  | -1.18255700 |
| C | -0.27440400 | -3.36010100 | -1.08703000 | C                                            | -3.97541900  | 0.40950900  | 4.41486600  |
| C | -2.06893600 | -4.88680700 | 0.40217900  | H                                            | -5.57367800  | 1.44887100  | 3.36514400  |
| H | -1.57790100 | -3.58177100 | 2.04013400  | H                                            | -4.11927800  | 2.41256700  | 3.60898400  |
| C | -0.95017300 | -4.42656300 | -1.68608200 | H                                            | -2.09342100  | -0.45043100 | 5.09002400  |
| H | 0.37816400  | -2.74472700 | -1.69983500 | H                                            | -2.00378000  | 1.25719400  | 4.66914400  |
| C | -1.85595000 | -5.19654800 | -0.94637600 | C                                            | -4.25552800  | -1.76894800 | -2.93853000 |
| H | -2.77214100 | -5.47227700 | 0.99077100  | H                                            | -3.64460900  | -0.21980300 | -4.33938800 |
| H | -0.78358000 | -4.64483800 | -2.73865700 | H                                            | -4.81283900  | 0.31119800  | -3.13275300 |
| H | -2.39192600 | -6.01835400 | -1.41490700 | H                                            | -4.75205500  | -2.97644100 | -1.19780400 |
| H | 1.96129500  | -1.19665800 | 1.93309000  | H                                            | -5.49235000  | -1.37349800 | -1.20299900 |
| P | -1.71520500 | 0.71885300  | 0.16731600  | H                                            | -0.90933600  | 6.40580700  | -0.57811900 |
| C | -1.46058600 | 2.49506000  | -0.34818800 | H                                            | -1.44115900  | 5.63738800  | 0.91567900  |
| C | -2.44517600 | 0.92869500  | 1.90387400  | H                                            | -4.30635600  | 0.71284700  | 5.41538300  |
| C | -3.10167400 | 0.08258100  | -0.91083600 | H                                            | -4.41827600  | -0.57754600 | 4.22011200  |
| C | -2.69356800 | 3.41575300  | -0.28593200 | H                                            | -5.09887500  | -2.11857100 | -3.54691900 |
| C | -0.27279400 | 3.12027900  | 0.41490200  | H                                            | -3.39630000  | -2.40737200 | -3.18690700 |
| H | -1.15306100 | 2.39831200  | -1.39177700 | O                                            | 1.12510200   | 2.60494500  | -3.22158400 |
| C | -3.98796900 | 1.02614300  | 1.95094600  | H                                            | 1.90326100   | 3.17992300  | -3.27433500 |
| C | -1.94016200 | -0.06786500 | 2.96234000  |                                              |              |             |             |
| H | -2.05559900 | 1.91143400  | 2.19905400  |                                              |              |             |             |
| C | -2.77255900 | 0.23495500  | -2.41085100 | <b>dist-6-toluene</b>                        |              |             |             |
| C | -3.41217100 | -1.39218300 | -0.58666200 | Sum of electronic and thermal Free Energies= | -3696.912889 |             |             |
| H | -3.99074600 | 0.68612000  | -0.69257600 | Ni                                           | 0.28606500   | -0.17710000 | -0.93404100 |
| C | -2.35088800 | 4.80333400  | -0.85986200 | C                                            | -0.68929200  | -0.10266700 | -2.87375900 |
| H | -3.02766300 | 3.53798600  | 0.75258000  | C                                            | 0.62664500   | -0.51405800 | -2.99531700 |
| H | -3.53152200 | 2.98408700  | -0.84517300 | H                                            | 1.31143100   | 0.32222300  | -3.13023400 |
| C | 0.06677800  | 4.50911100  | -0.15052900 | C                                            | -6.30359900  | 1.92851000  | 0.26266700  |
| H | -0.51829500 | 3.22068900  | 1.48178100  | C                                            | -5.54668200  | 1.36754300  | -0.77035300 |
| H | 0.60143900  | 2.46454700  | 0.34841600  | C                                            | -5.26353600  | -0.00898800 | -0.79237400 |

|   |             |             |             |   |             |             |             |
|---|-------------|-------------|-------------|---|-------------|-------------|-------------|
| C | -5.75899200 | -0.80705500 | 0.24967500  | H | 3.90155900  | 1.59335000  | 4.51599000  |
| C | -6.52211800 | -0.25163000 | 1.28353500  | H | 3.12679900  | 2.62933600  | 3.31791900  |
| C | -6.79670700 | 1.11931000  | 1.29439800  | H | 5.32657300  | 1.45646300  | 0.43295400  |
| H | -6.50794900 | 2.99654400  | 0.26348600  | H | 3.99809600  | 2.54468400  | 0.82488800  |
| H | -5.17170900 | 2.00766200  | -1.56658000 | H | 5.53582000  | 2.37542800  | 2.76811200  |
| H | -5.54195900 | -1.87358400 | 0.25674800  | H | 5.37830000  | 0.61987600  | 2.77406300  |
| H | -6.89152600 | -0.88819000 | 2.08408500  | C | 1.53661800  | -2.30819300 | 1.48304200  |
| H | -7.38242700 | 1.55525800  | 2.09993000  | C | 1.31928800  | -2.81641900 | 2.92624500  |
| C | -4.42094900 | -0.61109400 | -1.89962200 | C | 1.09346400  | -3.37733300 | 0.46358300  |
| C | -2.98250900 | -0.06789900 | -1.90629500 | H | 2.61661100  | -2.16589100 | 1.34441700  |
| H | -4.88502700 | -0.41339900 | -2.87531800 | C | 2.06865300  | -4.14074100 | 3.15717700  |
| H | -4.40289400 | -1.69838000 | -1.76796300 | H | 0.24946800  | -2.98248700 | 3.10039300  |
| C | -2.04292400 | -0.77760900 | -2.90294000 | H | 1.64515300  | -2.07593200 | 3.66214300  |
| H | -3.00237200 | 1.00257000  | -2.14085900 | C | 1.83228600  | -4.70344800 | 0.69973100  |
| H | -2.54755700 | -0.17665100 | -0.90777900 | H | 0.01110600  | -3.53953100 | 0.54640700  |
| H | -2.43889600 | -0.62714200 | -3.92304100 | H | 1.27360700  | -3.02347300 | -0.55275400 |
| O | -1.96445100 | -2.17913100 | -2.62979300 | C | 1.65002700  | -5.21036000 | 2.13768300  |
| C | 1.44233900  | 6.56344900  | -0.92032100 | H | 1.88550200  | -4.49314400 | 4.17967400  |
| C | 0.68015100  | 5.38865500  | -0.89430900 | H | 3.14990400  | -3.96131100 | 3.07395200  |
| C | 1.27537600  | 4.12336000  | -1.06269100 | H | 1.47987200  | -5.45068400 | -0.02106100 |
| C | 2.66907700  | 4.08007900  | -1.26355600 | H | 2.90233800  | -4.55562500 | 0.49666300  |
| C | 3.44082700  | 5.24679800  | -1.29442900 | H | 2.22463200  | -6.13119600 | 2.29601300  |
| C | 2.82734100  | 6.49513900  | -1.12041800 | H | 0.59297700  | -5.46555400 | 2.29909200  |
| H | 0.96128900  | 7.53048700  | -0.78531000 | C | -0.58491800 | -0.31455700 | 2.29093600  |
| H | -0.39496200 | 5.44763300  | -0.73939400 | C | -0.99914700 | 1.17242300  | 2.27515900  |
| H | 3.14160700  | 3.10974900  | -1.39773800 | C | -1.78101200 | -1.21783700 | 1.91995100  |
| H | 4.51631900  | 5.18768300  | -1.45197400 | H | -0.25408700 | -0.57318000 | 3.30465500  |
| H | 3.42277700  | 7.40574600  | -1.14153000 | C | -2.21955500 | 1.42951300  | 3.17222600  |
| B | 0.44437800  | 2.77256300  | -1.01267000 | H | -1.23333600 | 1.47123700  | 1.24692900  |
| O | -0.95847800 | 2.93716800  | -0.92242300 | H | -0.16900000 | 1.80919100  | 2.59660000  |
| H | -1.36226900 | 2.05666700  | -0.87130300 | C | -2.99585800 | -0.94992300 | 2.82188100  |
| O | 1.05001400  | 1.59006100  | -1.04848200 | H | -2.05522800 | -1.02942800 | 0.87680500  |
| H | -2.80321000 | -2.58213200 | -2.90199200 | H | -1.49950300 | -2.27469300 | 1.97257600  |
| H | -0.33297400 | -1.46875800 | -0.76362400 | C | -3.40114600 | 0.52973000  | 2.78824400  |
| P | 0.84458400  | -0.59791500 | 1.13091300  | H | -2.50429600 | 2.48594900  | 3.10255400  |
| C | 2.18279700  | 0.58716400  | 1.65848800  | H | -1.94309400 | 1.24349200  | 4.22004200  |
| C | 2.58923400  | 0.54110700  | 3.14333200  | H | -3.83457800 | -1.57805300 | 2.49966900  |
| C | 3.41993300  | 0.46809600  | 0.74279900  | H | -2.75562300 | -1.24177000 | 3.85441400  |
| H | 1.73620500  | 1.56291400  | 1.43656100  | H | -4.25142500 | 0.70675700  | 3.45677900  |
| C | 3.60676700  | 1.65155600  | 3.46089600  | H | -3.74479500 | 0.78690100  | 1.77826500  |
| H | 3.04762800  | -0.42997600 | 3.37015700  | H | -0.80669900 | 0.97377900  | -2.99981800 |
| H | 1.71411000  | 0.64207400  | 3.79548800  | C | 1.32448800  | -1.81646500 | -3.04908400 |
| C | 4.44054200  | 1.57112900  | 1.06984900  | C | 0.75187500  | -3.04404700 | -3.42763100 |
| H | 3.89874200  | -0.51189400 | 0.87639400  | C | 2.68732000  | -1.80106900 | -2.67717100 |
| H | 3.09988100  | 0.54908400  | -0.29900000 | C | 1.51168900  | -4.21597700 | -3.40704000 |
| C | 4.84187600  | 1.55397200  | 2.55244400  | H | -0.29230000 | -3.07510100 | -3.70821600 |

|                                              |              |             |             |   |             |             |             |
|----------------------------------------------|--------------|-------------|-------------|---|-------------|-------------|-------------|
| C                                            | 3.44168300   | -2.97462400 | -2.64361100 | H | 1.65526700  | 3.54878000  | 2.05066800  |
| H                                            | 3.14344800   | -0.85748400 | -2.38629400 | H | 0.95944200  | 4.26311200  | 0.59698800  |
| C                                            | 2.85377000   | -4.19220200 | -3.00635800 | C | 4.40756300  | 2.29709900  | 0.60932800  |
| H                                            | 1.05199600   | -5.15730100 | -3.69952900 | H | 2.97591600  | 1.27372500  | 1.86923900  |
| H                                            | 4.48362900   | -2.93987100 | -2.33479900 | H | 3.17101800  | 0.54671600  | 0.27521200  |
| H                                            | 3.43442000   | -5.11105700 | -2.98027800 | C | 4.33363800  | 3.68412000  | 1.26595100  |
|                                              |              |             |             | H | 3.05096300  | 5.44342700  | 1.27274400  |
|                                              |              |             |             | H | 3.23775900  | 4.68765400  | -0.30915600 |
|                                              |              |             |             | H | 5.25009900  | 1.72592700  | 1.01728600  |
| <b>dist-6<sup>B</sup>-toluene</b>            |              |             |             | H | 4.59379700  | 2.41203300  | -0.46667800 |
| Sum of electronic and thermal Free Energies= | -3541.186411 |             |             | H | 5.25611400  | 4.24521000  | 1.07379900  |
| Ni                                           | 0.91518800   | -0.53758600 | -0.77971800 | H | 4.25774000  | 3.56503800  | 2.35644300  |
| C                                            | 0.66486800   | -2.48892700 | -1.62989300 | C | -0.15728700 | 1.14042800  | 2.12979600  |
| C                                            | 2.00210600   | -2.30582100 | -1.31515700 | C | -1.00865700 | 2.32437500  | 2.64476700  |
| H                                            | 2.58027100   | -1.87933300 | -2.13241500 | C | -0.85641600 | -0.18774500 | 2.48953500  |
| C                                            | -5.84735100  | -0.78250400 | -0.52757200 | H | 0.80469300  | 1.15930900  | 2.66151100  |
| C                                            | -4.93315900  | -1.77618100 | -0.89654600 | C | -1.25274000 | 2.21910800  | 4.16004300  |
| C                                            | -4.03200500  | -2.31065000 | 0.03750600  | H | -1.98230000 | 2.31557800  | 2.13890200  |
| C                                            | -4.07315400  | -1.82608500 | 1.35557900  | H | -0.53968300 | 3.28426400  | 2.41187900  |
| C                                            | -4.98088500  | -0.82987900 | 1.72962100  | C | -1.12954800 | -0.29779000 | 3.99777800  |
| C                                            | -5.87144100  | -0.30118900 | 0.78686800  | H | -1.80544600 | -0.26058500 | 1.94545100  |
| H                                            | -6.53690600  | -0.38059000 | -1.26638800 | H | -0.24757700 | -1.03397600 | 2.16265700  |
| H                                            | -4.91357100  | -2.13534700 | -1.92416200 | C | -1.94004800 | 0.89543200  | 4.52155400  |
| H                                            | -3.38062800  | -2.22869700 | 2.09240600  | H | -1.85987600 | 3.06987200  | 4.49232800  |
| H                                            | -4.99192600  | -0.46599000 | 2.75478500  | H | -0.29208400 | 2.28995300  | 4.68914700  |
| H                                            | -6.57679600  | 0.47525900  | 1.07292300  | H | -1.65440800 | -1.23858300 | 4.20480600  |
| C                                            | -2.95635800  | -3.29079700 | -0.38154000 | H | -0.17096300 | -0.34810700 | 4.53331400  |
| C                                            | -1.70953200  | -2.50732300 | -0.82818300 | H | -2.07826800 | 0.81871000  | 5.60671200  |
| H                                            | -3.31015700  | -3.93336100 | -1.19658900 | H | -2.94273100 | 0.87642900  | 4.07095500  |
| H                                            | -2.68591700  | -3.94103000 | 0.45555200  | C | -1.00519800 | 2.24668800  | -0.51608000 |
| C                                            | -0.44572000  | -3.34557700 | -1.04249200 | C | -0.54571400 | 2.92847000  | -1.82049100 |
| H                                            | -1.93181100  | -1.96369800 | -1.75409300 | C | -2.20831300 | 1.30947700  | -0.76592100 |
| H                                            | -1.47422800  | -1.75360800 | -0.07425600 | H | -1.31924900 | 3.03590800  | 0.17636800  |
| H                                            | -0.65888400  | -4.10779100 | -1.81343700 | C | -1.71579100 | 3.64361200  | -2.51591800 |
| O                                            | -0.15278300  | -4.00386200 | 0.18942300  | H | -0.11892100 | 2.18305700  | -2.49385400 |
| B                                            | 1.17077900   | 0.37388100  | -3.57461200 | H | 0.24997900  | 3.65080300  | -1.61148900 |
| O                                            | -0.14755900  | -0.00171100 | -3.95301600 | C | -3.36084200 | 2.02927400  | -1.47995600 |
| H                                            | -0.65717700  | -0.16438700 | -3.14554000 | H | -1.87293900 | 0.46227800  | -1.37814700 |
| O                                            | 1.61589300   | 0.38183200  | -2.32402600 | H | -2.57001300 | 0.87397200  | 0.17163900  |
| H                                            | 0.64146500   | -4.54784200 | 0.06448600  | C | -2.88599500 | 2.68625900  | -2.78319300 |
| H                                            | 0.47463200   | -1.14419500 | 0.43651600  | H | -1.36176400 | 4.08628000  | -3.45444200 |
| P                                            | 0.35161700   | 1.27254200  | 0.31958400  | H | -2.06461800 | 4.47404800  | -1.88500600 |
| C                                            | 1.89253900   | 2.31117000  | 0.28437100  | H | -4.16827700 | 1.31399400  | -1.67104800 |
| C                                            | 1.81225500   | 3.68589000  | 0.97277600  | H | -3.77367000 | 2.79866700  | -0.81200300 |
| C                                            | 3.10453100   | 1.50446900  | 0.80260400  | H | -3.71420000 | 3.22062500  | -3.26423800 |
| H                                            | 2.04505700   | 2.44793400  | -0.79323900 | H | -2.55827300 | 1.90751500  | -3.48574000 |
| C                                            | 3.11652100   | 4.47496900  | 0.76177500  |   |             |             |             |

|   |            |             |             |   |             |             |             |
|---|------------|-------------|-------------|---|-------------|-------------|-------------|
| H | 0.41269800 | -2.19050300 | -2.64883200 | C | 2.89654300  | -4.81449600 | -1.82673500 |
| C | 2.86863600 | -2.74659700 | -0.19454300 | H | 3.88441600  | -3.00423100 | -1.21912700 |
| C | 2.45830900 | -2.93749800 | 1.14146700  | C | 0.74414100  | -4.54201600 | -2.88990500 |
| C | 4.23485900 | -2.93141000 | -0.49609500 | H | 0.02183600  | -2.52785100 | -3.06670400 |
| C | 3.37184100 | -3.33344200 | 2.12038100  | C | 1.77017200  | -5.38114500 | -2.43456700 |
| H | 1.42618200 | -2.75391600 | 1.40832900  | H | 3.70424700  | -5.45199600 | -1.47444200 |
| C | 5.14809500 | -3.33152700 | 0.48218300  | H | -0.13975000 | -4.96836800 | -3.35805000 |
| H | 4.58302000 | -2.75855500 | -1.51214600 | H | 1.69176200  | -6.45889900 | -2.55297100 |
| C | 4.71941500 | -3.53891500 | 1.79835300  | P | 0.44474100  | -0.97804800 | 0.90036600  |
| H | 3.03098200 | -3.47058600 | 3.14408700  | C | -0.01504700 | -2.78136200 | 0.89674300  |
| H | 6.19357800 | -3.47207900 | 0.21881600  | C | -0.92723800 | -0.06892500 | 1.80713800  |
| H | 5.42785700 | -3.84210200 | 2.56542400  | C | 1.96718900  | -0.81036200 | 1.96189600  |
| O | 1.98394500 | 0.75677700  | -4.65075600 | C | -0.11501500 | -3.47210200 | 2.27081800  |
| H | 1.47123000 | 0.72347600  | -5.47199500 | C | -1.30458400 | -3.01215800 | 0.07896100  |

**dist-TS1-toluene**

Sum of electronic and thermal Free Energies= -3696.918791

|    |            |             |             |   |             |             |             |
|----|------------|-------------|-------------|---|-------------|-------------|-------------|
| C  | 2.06992600 | -1.10374400 | -1.91162800 | H | -1.82926400 | -0.60667900 | 1.48721300  |
| C  | 1.60963400 | -0.17295500 | -3.06744900 | C | 3.08973600  | -1.78041800 | 1.54731000  |
| Ni | 0.63813200 | -0.23073500 | -1.08726300 | C | 2.47738500  | 0.64634400  | 1.92425300  |
| C  | 0.80601200 | 1.25144000  | -2.78591000 | H | 1.66821400  | -1.05040400 | 2.99010000  |
| H  | 0.55009600 | 1.53601800  | -3.81707500 | C | -0.37762900 | -4.97829200 | 2.09704600  |
| C  | 1.78339900 | 2.28616400  | -2.18635600 | H | -0.94483800 | -3.03612700 | 2.83957300  |
| H  | 2.58451900 | 2.49785400  | -2.90624400 | H | 0.79458900  | -3.31534600 | 2.86100500  |
| H  | 2.26968100 | 1.85481100  | -1.30191100 | C | -1.58719300 | -4.51425200 | -0.08227500 |
| C  | 1.09291500 | 3.59432600  | -1.76407400 | H | -2.15681600 | -2.54192300 | 0.58518200  |
| H  | 0.71697800 | 4.11843300  | -2.65061800 | H | -1.22144900 | -2.52860900 | -0.89958400 |
| H  | 0.22508200 | 3.33520100  | -1.15125800 | C | -2.13161100 | 0.50954500  | 3.96042500  |
| C  | 2.03101400 | 4.48370700  | -0.97792000 | H | 0.01080600  | 0.45001600  | 3.69658500  |
| C  | 2.71666300 | 5.55015900  | -1.57867300 | H | -0.74256700 | -1.13787900 | 3.71754900  |
| C  | 2.27476900 | 4.21692700  | 0.38113200  | C | -2.35739600 | 2.02061900  | 1.93814600  |
| C  | 3.62071800 | 6.32989300  | -0.84551400 | H | -0.21861200 | 1.98230900  | 1.64034900  |
| H  | 2.53967100 | 5.77490900  | -2.62906300 | H | -1.13152100 | 1.44424000  | 0.24566000  |
| C  | 3.17711500 | 4.98916300  | 1.11813800  | C | 4.33655100  | -1.59809000 | 2.42828900  |
| H  | 1.74699400 | 3.39635600  | 0.86276200  | H | 3.35956700  | -1.58422800 | 0.50582500  |
| C  | 3.85623000 | 6.05127200  | 0.50583400  | H | 2.74962400  | -2.81970300 | 1.59338600  |
| H  | 4.13861200 | 7.15544200  | -1.32864300 | C | 3.73677900  | 0.83419100  | 2.78412100  |
| H  | 3.34756900 | 4.76751200  | 2.16955800  | H | 2.69893200  | 0.91424000  | 0.88263300  |
| H  | 4.55627500 | 6.65672700  | 1.07663700  | H | 1.69883100  | 1.33522400  | 2.26377600  |
| H  | 2.50968200 | 0.18059200  | -3.57840700 | C | -1.65223800 | -5.22852400 | 1.27638800  |
| H  | 1.00204200 | -0.72209100 | -3.78814700 | H | -0.45609800 | -5.45603200 | 3.08120300  |
| H  | 3.04709500 | -0.81211400 | -1.51699300 | H | 0.48135800  | -5.43680300 | 1.58761400  |
| C  | 1.96865500 | -2.56951200 | -2.12194600 | H | -2.52526400 | -4.65394600 | -0.63284500 |
| C  | 2.99512200 | -3.42801400 | -1.67936700 | H | -0.79128300 | -4.96206000 | -0.68937300 |
| C  | 0.84046800 | -3.15979100 | -2.73156300 | C | -2.34462700 | 1.95037100  | 3.47183100  |
|    |            |             |             | H | -2.06288200 | 0.48200500  | 5.05491700  |

|                                                           |             |             |             |   |             |             |             |
|-----------------------------------------------------------|-------------|-------------|-------------|---|-------------|-------------|-------------|
| H                                                         | -3.00129000 | -0.10156000 | 3.68202600  | C | -4.36075600 | 1.65751400  | -0.87782400 |
| H                                                         | -2.44832000 | 3.05831300  | 1.59826200  | C | -5.56387700 | 1.77343800  | -1.58946800 |
| H                                                         | -3.23845400 | 1.49245000  | 1.55155400  | C | -3.75119300 | 2.83190600  | -0.40124700 |
| C                                                         | 4.84532600  | -0.14966800 | 2.38464100  | C | -6.14610200 | 3.02688800  | -1.81929900 |
| H                                                         | 5.12186600  | -2.28946900 | 2.09954400  | H | -6.05123600 | 0.87527600  | -1.96451400 |
| H                                                         | 4.09163100  | -1.86832500 | 3.46501200  | C | -4.32604300 | 4.08553800  | -0.62835600 |
| H                                                         | 4.08979600  | 1.86825000  | 2.69133300  | H | -2.81798600 | 2.75832200  | 0.15469600  |
| H                                                         | 3.47752200  | 0.68029000  | 3.84094000  | C | -5.52863600 | 4.18800300  | -1.34077700 |
| H                                                         | -1.80462600 | -6.30489500 | 1.13174500  | H | -7.08165500 | 3.09586300  | -2.36970800 |
| H                                                         | -2.52035000 | -4.85943300 | 1.84071000  | H | -3.84062500 | 4.98164400  | -0.24789100 |
| H                                                         | -3.27912200 | 2.35341000  | 3.88013900  | H | -5.98009700 | 5.16140800  | -1.51693900 |
| H                                                         | -1.53200400 | 2.58340700  | 3.85663100  | H | -0.93527300 | -0.86632100 | -3.36955800 |
| H                                                         | 5.71517100  | -0.03049500 | 3.04133200  | H | -0.14579800 | -2.29346500 | -2.61573900 |
| H                                                         | 5.18391200  | 0.08319000  | 1.36523100  | H | 0.90217000  | 0.54919300  | -2.95378700 |
| O                                                         | -0.37624300 | 1.13931600  | -2.03138400 | C | 2.27208600  | -1.07537300 | -2.56788600 |
| C                                                         | -6.79478200 | 2.49795000  | -0.07490900 | C | 3.35989600  | -0.38373700 | -3.13757500 |
| C                                                         | -5.49277700 | 2.45777600  | -0.58574300 | C | 2.49534600  | -2.39419900 | -2.11634000 |
| C                                                         | -4.87609800 | 1.23576100  | -0.91868500 | C | 4.62249300  | -0.97493800 | -3.24073100 |
| C                                                         | -5.61085400 | 0.05038800  | -0.72144100 | H | 3.21501000  | 0.62714500  | -3.51136700 |
| C                                                         | -6.91368700 | 0.08051500  | -0.21073500 | C | 3.75259300  | -2.98838800 | -2.22997500 |
| C                                                         | -7.50878200 | 1.30696200  | 0.11382900  | H | 1.67789300  | -2.94177400 | -1.65584000 |
| H                                                         | -7.25419300 | 3.45175000  | 0.17682500  | C | 4.82783600  | -2.28337600 | -2.78790500 |
| H                                                         | -4.93757400 | 3.38237600  | -0.72560800 | H | 5.44383900  | -0.41605000 | -3.68384500 |
| H                                                         | -5.14969100 | -0.90258900 | -0.97155400 | H | 3.89870500  | -4.00427400 | -1.86978900 |
| H                                                         | -7.46610600 | -0.84570700 | -0.06556300 | H | 5.80777500  | -2.74724500 | -2.86904800 |
| H                                                         | -8.52145000 | 1.33456500  | 0.51095600  | P | 1.43050800  | 0.78393500  | 0.62711600  |
| B                                                         | -3.40247900 | 1.19635700  | -1.46375300 | C | 3.10749300  | 0.00009000  | 0.82458900  |
| O                                                         | -2.72185400 | 2.37714100  | -1.63815900 | C | 0.70792700  | 0.95237900  | 2.35461900  |
| H                                                         | -1.78282000 | 2.17974100  | -1.88602400 | C | 1.72552900  | 2.52911100  | 0.03688200  |
| O                                                         | -2.82771800 | -0.03097600 | -1.72293300 | C | 4.13491800  | 0.75151400  | 1.69146300  |
| H                                                         | -1.89518400 | 0.10484600  | -2.01189000 | C | 2.96355300  | -1.46347600 | 1.29457700  |
|                                                           |             |             |             | H | 3.48198500  | -0.03382100 | -0.20738200 |
|                                                           |             |             |             | C | 1.21113400  | 2.15501900  | 3.18278300  |
| <b>dist-TS1-2-toluene</b>                                 |             |             |             | C | -0.83676200 | 0.92010400  | 2.36468300  |
| Sum of electronic and thermal Free Energies= -3696.908678 |             |             |             | H | 1.04057600  | 0.02938500  | 2.84679600  |
| C                                                         | 0.95109300  | -0.41051800 | -2.43518300 | C | 2.66924700  | 2.59744900  | -1.17825300 |
| C                                                         | -0.31224900 | -1.22146400 | -2.55085000 | C | 0.37576400  | 3.20150400  | -0.29649900 |
| Ni                                                        | 0.20989200  | -0.40570400 | -0.69541500 | H | 2.19502400  | 3.07764900  | 0.86274800  |
| C                                                         | -1.69164100 | -1.13554000 | -1.32550600 | C | 5.49786400  | 0.03858900  | 1.65217000  |
| H                                                         | -2.16397500 | -2.05250400 | -1.68249100 | H | 3.78551600  | 0.77856500  | 2.73060300  |
| C                                                         | -2.51146400 | 0.12343900  | -1.63040500 | H | 4.24399800  | 1.79157800  | 1.36335200  |
| H                                                         | -2.87904300 | 0.07512200  | -2.66146000 | C | 4.32404400  | -2.17787200 | 1.28372500  |
| H                                                         | -1.86366200 | 1.00546300  | -1.57106100 | H | 2.54526400  | -1.49303200 | 2.30851100  |
| C                                                         | -3.69149200 | 0.31860700  | -0.65894100 | H | 2.25244900  | -1.98622000 | 0.64808700  |
| H                                                         | -4.40777200 | -0.50133300 | -0.77652200 | C | 0.68593300  | 2.07650000  | 4.62784200  |
| H                                                         | -3.30394000 | 0.25703500  | 0.36112900  | H | 0.84968300  | 3.08706500  | 2.72927500  |

|   |             |             |             |                                              |             |             |             |
|---|-------------|-------------|-------------|----------------------------------------------|-------------|-------------|-------------|
| H | 2.30283300  | 2.21327200  | 3.19086300  | O                                            | -0.11924800 | -3.32383300 | -0.12344200 |
| C | -1.37040800 | 0.84758000  | 3.80339600  | H                                            | 0.59754000  | -3.54377800 | 0.48842100  |
| H | -1.23023700 | 1.82508100  | 1.88253800  |                                              |             |             |             |
| H | -1.19310900 | 0.06643900  | 1.79263800  |                                              |             |             |             |
| C | 2.86292600  | 4.04625600  | -1.65483300 | <b>dist-TS3-toluene</b>                      |             |             |             |
| H | 2.23959500  | 2.00853100  | -1.99308500 | Sum of electronic and thermal Free Energies= |             |             |             |
| H | 3.64095800  | 2.15072000  | -0.94589500 | Ni                                           | -0.12145300 | -0.48530300 | 0.28264000  |
| C | 0.56141500  | 4.64436100  | -0.79116800 | C                                            | 1.18310600  | -2.12844600 | 0.34962200  |
| H | -0.12767200 | 2.60735200  | -1.07135700 | H                                            | 1.75643700  | -2.04109600 | 1.27097000  |
| H | -0.28366400 | 3.19641200  | 0.57652600  | C                                            | -0.15211400 | -2.52272800 | 0.54535400  |
| C | 5.37222200  | -1.42157600 | 2.11409200  | H                                            | -0.45841400 | -2.65470500 | 1.58225000  |
| H | 6.21727000  | 0.57812500  | 2.28030700  | C                                            | 8.02775000  | -1.70394100 | -0.27619000 |
| H | 5.88848400  | 0.06450600  | 0.62536900  | C                                            | 6.69428800  | -1.46274200 | -0.62788600 |
| H | 4.20566300  | -3.20147100 | 1.65997800  | C                                            | 5.66353800  | -1.59158200 | 0.31649500  |
| H | 4.67152600  | -2.25869000 | 0.24678100  | C                                            | 6.00257000  | -1.96882500 | 1.62640200  |
| C | -0.84796200 | 2.00439400  | 4.66764900  | C                                            | 7.33311100  | -2.21057700 | 1.98480700  |
| H | 1.04261000  | 2.94392700  | 5.19690100  | C                                            | 8.35219300  | -2.07967800 | 1.03278700  |
| H | 1.10605700  | 1.18494200  | 5.11393100  | H                                            | 8.81251700  | -1.59459700 | -1.02123000 |
| H | -2.46746200 | 0.84721000  | 3.78986600  | H                                            | 6.45139200  | -1.16602700 | -1.64701700 |
| H | -1.05962600 | -0.10967000 | 4.24454200  | H                                            | 5.21642000  | -2.06977900 | 2.37318400  |
| C | 1.51935900  | 4.71080500  | -1.98895700 | H                                            | 7.57569900  | -2.49724400 | 3.00551500  |
| H | 3.52406800  | 4.05951500  | -2.52986200 | H                                            | 9.38735900  | -2.26447000 | 1.30938400  |
| H | 3.36925600  | 4.62301100  | -0.86808200 | C                                            | 4.21887400  | -1.37233600 | -0.07533100 |
| H | -0.41444100 | 5.06901600  | -1.05617300 | C                                            | 3.52118000  | -2.68918200 | -0.46867000 |
| H | 0.96184800  | 5.25731700  | 0.02849100  | H                                            | 4.16031400  | -0.67881100 | -0.91749000 |
| H | 6.34416300  | -1.92532100 | 2.04733900  | H                                            | 3.68012600  | -0.89999100 | 0.75306300  |
| H | 5.07965100  | -1.43848000 | 3.17365600  | C                                            | 2.04178100  | -2.53265300 | -0.85407000 |
| H | -1.19606000 | 1.89941900  | 5.70245600  | H                                            | 4.05861800  | -3.13685100 | -1.31499800 |
| H | -1.26098400 | 2.95080600  | 4.29008300  | H                                            | 3.59446900  | -3.41187900 | 0.35347800  |
| H | 1.67377800  | 5.75192600  | -2.29633700 | H                                            | 1.66873200  | -3.51238900 | -1.18527900 |
| H | 1.06353500  | 4.19238100  | -2.84435100 | O                                            | 1.88421800  | -1.59691400 | -1.94012800 |
| O | -1.40345300 | -1.23105200 | 0.03304100  | C                                            | -6.62777900 | -1.55662500 | 1.98833300  |
| B | -1.16325900 | -2.69222900 | 0.67729200  | C                                            | -5.27136400 | -1.32343800 | 2.24969200  |
| C | -2.60511700 | -3.42353800 | 0.59264900  | C                                            | -4.34829100 | -1.12523100 | 1.20574700  |
| C | -3.75019800 | -2.84630800 | 1.17840500  | C                                            | -4.83193300 | -1.17675100 | -0.11634500 |
| C | -2.77268800 | -4.65631500 | -0.06176900 | C                                            | -6.18293300 | -1.41311900 | -0.38942800 |
| C | -5.00258500 | -3.46877000 | 1.12172800  | C                                            | -7.08721400 | -1.60135000 | 0.66551100  |
| H | -3.66558400 | -1.88066800 | 1.67653200  | H                                            | -7.32582500 | -1.70499700 | 2.81023000  |
| C | -4.02121200 | -5.29082800 | -0.13035700 | H                                            | -4.91840200 | -1.29649900 | 3.27867300  |
| H | -1.90324700 | -5.11897600 | -0.52448500 | H                                            | -4.12340100 | -1.04472000 | -0.93052500 |
| C | -5.14261900 | -4.69844300 | 0.46315800  | H                                            | -6.53338800 | -1.45608200 | -1.41915100 |
| H | -5.86872200 | -2.99763500 | 1.58338700  | H                                            | -8.13976000 | -1.78466500 | 0.45830900  |
| H | -4.12112700 | -6.24475100 | -0.64551200 | B                                            | -2.80691400 | -0.87093300 | 1.45527200  |
| H | -6.11385600 | -5.18643300 | 0.41273300  | O                                            | -2.34944900 | -1.09655500 | 2.77219400  |
| O | -0.68030500 | -2.41984600 | 2.01846500  | H                                            | -1.40223500 | -0.88265000 | 2.79351900  |
| H | -1.39212800 | -2.53700800 | 2.66162900  | O                                            | -2.01943100 | -0.46859300 | 0.46194000  |

|   |             |             |             |                                              |             |             |             |
|---|-------------|-------------|-------------|----------------------------------------------|-------------|-------------|-------------|
| H | 2.32889200  | -1.97734700 | -2.71584600 | H                                            | 4.58379300  | 4.14566000  | -2.51878800 |
| C | -1.08569700 | -3.12411900 | -0.42836000 | H                                            | 4.35868400  | 3.80197000  | -0.80516500 |
| C | -2.14257600 | -3.91313200 | 0.06438000  | C                                            | -0.20072400 | 2.62720700  | 1.48139200  |
| C | -1.02185900 | -2.88773700 | -1.81710400 | C                                            | -1.55504500 | 2.46348000  | 2.20022400  |
| C | -3.09260000 | -4.46604600 | -0.79618100 | C                                            | 0.95790500  | 2.16150400  | 2.39111900  |
| H | -2.23441700 | -4.07245000 | 1.13636100  | H                                            | -0.06445800 | 3.69164700  | 1.25743200  |
| C | -1.97103100 | -3.44333900 | -2.67713500 | C                                            | -1.55786600 | 3.19492000  | 3.55238800  |
| H | -0.25258900 | -2.23114700 | -2.20946700 | H                                            | -1.75963200 | 1.40134500  | 2.35895500  |
| C | -3.00943900 | -4.23818400 | -2.17455600 | H                                            | -2.36915700 | 2.84616000  | 1.57647500  |
| H | -3.90976700 | -5.05558800 | -0.38823300 | C                                            | 0.94644100  | 2.88918500  | 3.74403800  |
| H | -1.91217700 | -3.23873400 | -3.74414700 | H                                            | 0.85663200  | 1.07864200  | 2.55242500  |
| H | -3.75514300 | -4.65729800 | -2.84582500 | H                                            | 1.92376500  | 2.30892600  | 1.89442400  |
| H | 1.31433300  | -0.34007800 | 0.13364400  | C                                            | -0.40596400 | 2.72577700  | 4.45272100  |
| P | -0.12364700 | 1.68238100  | -0.12495200 | H                                            | -2.52108300 | 3.03338100  | 4.05034100  |
| C | -1.68325300 | 2.06171300  | -1.06019300 | H                                            | -1.46621900 | 4.27731000  | 3.38216500  |
| C | -1.93104900 | 3.54255700  | -1.39781000 | H                                            | 1.75976800  | 2.50984100  | 4.37465700  |
| C | -1.78307600 | 1.17375400  | -2.31920300 | H                                            | 1.14536800  | 3.95786700  | 3.58104300  |
| H | -2.46174500 | 1.70829700  | -0.37690100 | H                                            | -0.40992900 | 3.28046100  | 5.39870100  |
| C | -3.30188700 | 3.71729600  | -2.07613600 | H                                            | -0.55619200 | 1.66681900  | 4.70604800  |
| H | -1.15186400 | 3.90653100  | -2.08039400 |                                              |             |             |             |
| H | -1.87959300 | 4.16300200  | -0.49499500 |                                              |             |             |             |
| C | -3.14745700 | 1.36081800  | -3.00253600 | <b>dist-TS1<sup>B</sup>-toluene</b>          |             |             |             |
| H | -0.98515100 | 1.43078200  | -3.03065800 | Sum of electronic and thermal Free Energies= |             |             |             |
| H | -1.64728800 | 0.12635400  | -2.03406400 | C                                            | -0.57184600 | -1.98830500 | -1.49498500 |
| C | -3.42187300 | 2.83675200  | -3.32993100 | C                                            | 0.24178000  | -1.61433700 | -2.76383700 |
| H | -3.45748000 | 4.77228400  | -2.33364400 | Ni                                           | -0.05337900 | -0.26194500 | -1.01510100 |
| H | -4.09174800 | 3.44360600  | -1.36338100 | C                                            | 1.37307300  | -0.40109100 | -2.77319700 |
| H | -3.19338700 | 0.75186500  | -3.91383200 | H                                            | 1.57111500  | -0.34267400 | -3.85441100 |
| H | -3.93093000 | 0.98580900  | -2.33086700 | C                                            | 2.66530500  | -0.83073500 | -2.05243000 |
| H | -4.41731300 | 2.94893400  | -3.77657700 | H                                            | 3.02588600  | -1.78084700 | -2.46704000 |
| H | -2.69734700 | 3.18187900  | -4.08184700 | H                                            | 2.45391400  | -1.01112500 | -0.99005200 |
| C | 1.24791300  | 2.47728000  | -1.13998200 | C                                            | 3.76577800  | 0.24016800  | -2.16177000 |
| C | 1.55013000  | 3.95333900  | -0.79848500 | H                                            | 4.06084900  | 0.34491000  | -3.21328500 |
| C | 2.54881600  | 1.65326600  | -1.14801400 | H                                            | 3.33823300  | 1.19818700  | -1.85356400 |
| H | 0.84547700  | 2.45023200  | -2.16215200 | C                                            | 4.96924300  | -0.09944900 | -1.31081000 |
| C | 2.57814300  | 4.54611000  | -1.77810500 | C                                            | 5.99447900  | -0.92553500 | -1.79961500 |
| H | 1.96035800  | 4.01677800  | 0.21728700  | C                                            | 5.06226500  | 0.36262000  | 0.01270200  |
| H | 0.63899400  | 4.55861300  | -0.81002500 | C                                            | 7.08068700  | -1.28183300 | -0.99200000 |
| C | 3.59242500  | 2.25283100  | -2.10393300 | H                                            | 5.94287600  | -1.28932400 | -2.82461500 |
| H | 2.96683400  | 1.61556900  | -0.13290300 | C                                            | 6.14483300  | 0.00963700  | 0.82601600  |
| H | 2.32894800  | 0.62444700  | -1.43562500 | H                                            | 4.28131900  | 1.00955800  | 0.40565200  |
| C | 3.87765200  | 3.72832800  | -1.79074900 | C                                            | 7.15939500  | -0.81641800 | 0.32657400  |
| H | 2.78448500  | 5.58872200  | -1.50715300 | H                                            | 7.86702300  | -1.91834900 | -1.39163900 |
| H | 2.14635400  | 4.56194900  | -2.78878400 | H                                            | 6.20024700  | 0.38343800  | 1.84613500  |
| H | 4.51786800  | 1.66526600  | -2.05218400 | H                                            | 8.00402700  | -1.08914300 | 0.95481200  |
| H | 3.22190000  | 2.16693700  | -3.13551700 | H                                            | 0.83152600  | -2.48867000 | -3.05307400 |
|   |             |             |             | H                                            | -0.43928000 | -1.37352300 | -3.58177800 |



|   |             |             |             |                                              |              |             |             |
|---|-------------|-------------|-------------|----------------------------------------------|--------------|-------------|-------------|
| H | -0.11036600 | -2.79919200 | -0.92521500 | H                                            | -4.77198300  | 2.30296100  | -0.81948500 |
| C | -2.03921500 | -2.16723000 | -1.65447000 | H                                            | -4.87104100  | 0.56409500  | -0.54221000 |
| C | -2.70251000 | -3.26090100 | -1.06472700 | C                                            | 2.06642700   | 3.52828200  | 2.84356500  |
| C | -2.82049200 | -1.23004500 | -2.36640500 | H                                            | 0.64454600   | 3.49288000  | 4.49041500  |
| C | -4.08982500 | -3.40523300 | -1.16011400 | H                                            | -0.02186200  | 4.08396100  | 2.96958000  |
| H | -2.12473300 | -4.01253400 | -0.53158800 | H                                            | 3.14733300   | 3.29749100  | 0.96995100  |
| C | -4.20410800 | -1.37423500 | -2.46533300 | H                                            | 1.52357600   | 3.95523600  | 0.78531100  |
| H | -2.34295400 | -0.36526400 | -2.82175800 | C                                            | 0.58274100   | -3.92474800 | 3.09900100  |
| C | -4.85010200 | -2.46032100 | -1.85884800 | H                                            | -1.54436300  | -4.38385400 | 3.04935800  |
| H | -4.57588700 | -4.25964700 | -0.69460200 | H                                            | -1.10348500  | -3.11184100 | 4.18542300  |
| H | -4.78226600 | -0.63129700 | -3.00946100 | H                                            | 2.55064700   | -2.99443900 | 3.11061600  |
| H | -5.92923700 | -2.56915000 | -1.93366000 | H                                            | 1.39932700   | -2.27502300 | 4.23302300  |
| P | -0.70653500 | 0.09217300  | 0.98031500  | H                                            | -6.25354900  | 1.74190900  | 1.14678300  |
| C | -2.54890900 | 0.35580400  | 1.02247000  | H                                            | -4.88121100  | 2.74250300  | 1.61584300  |
| C | 0.11892800  | 1.67257000  | 1.56633500  | H                                            | 2.41053900   | 4.55177700  | 3.03427600  |
| C | -0.33138000 | -1.20854300 | 2.26216600  | H                                            | 2.75847400   | 2.85807400  | 3.37375100  |
| C | -3.18660700 | 0.64076200  | 2.39603700  | H                                            | 0.81910400   | -4.66036000 | 3.87696800  |
| C | -2.96983300 | 1.42864000  | -0.00290300 | H                                            | 0.76546400   | -4.41604700 | 2.13270400  |
| H | -2.93281700 | -0.60610100 | 0.65458300  | O                                            | 0.91135900   | 0.85100700  | -2.32139100 |
| C | 0.10166400  | 1.92839700  | 3.08874700  | B                                            | -1.21088200  | 3.10715400  | -2.33106700 |
| C | 1.56715300  | 1.81569600  | 1.03980000  | O                                            | -0.15582400  | 3.28982300  | -1.46172000 |
| H | -0.47285900 | 2.45234500  | 1.07016200  | H                                            | 0.50038300   | 2.57923400  | -1.59950600 |
| C | -1.23896800 | -2.44718500 | 2.12941800  | O                                            | -1.28511800  | 2.06078700  | -3.22200900 |
| C | 1.15446300  | -1.62181400 | 2.18647300  | H                                            | -0.47843700  | 1.48642900  | -3.08685700 |
| H | -0.51815200 | -0.75061000 | 3.24229300  | O                                            | -2.23629400  | 4.03350500  | -2.26553800 |
| C | -4.71994100 | 0.68998400  | 2.27370400  | H                                            | -2.91969600  | 3.80151800  | -2.91156000 |
| H | -2.83550900 | 1.61105000  | 2.76616100  |                                              |              |             |             |
| H | -2.89135400 | -0.11018200 | 3.13725700  |                                              |              |             |             |
| C | -4.49969100 | 1.50565500  | -0.11770000 | <b>dist-TS1<sup>B</sup>-2-toluene</b>        |              |             |             |
| H | -2.58075400 | 2.40931000  | 0.29550400  | Sum of electronic and thermal Free Energies= | -3541.181699 |             |             |
| H | -2.53275700 | 1.20112500  | -0.97878000 | C                                            | -0.75332500  | -1.76142200 | 1.73246100  |
| C | 0.65011800  | 3.33226200  | 3.40532000  | C                                            | 0.14685900   | -2.81816500 | 1.14784600  |
| H | 0.72922500  | 1.18033000  | 3.59105000  | Ni                                           | -0.09622700  | -1.01108100 | 0.12799800  |
| H | -0.90431500 | 1.82434200  | 3.50319000  | C                                            | 1.43860200   | -2.47575200 | -0.12754700 |
| C | 2.11749800  | 3.21805700  | 1.34010900  | H                                            | 1.56040200   | -3.52494400 | -0.39961200 |
| H | 2.20725500  | 1.06873200  | 1.52448600  | C                                            | 2.67137300   | -1.88068300 | 0.55522500  |
| H | 1.61852400  | 1.61093400  | -0.03227200 | H                                            | 2.95574400   | -2.49698500 | 1.41488700  |
| C | -0.89336300 | -3.51145600 | 3.18338000  | H                                            | 2.42796300   | -0.88538400 | 0.94535100  |
| H | -1.10818300 | -2.87724200 | 1.13319300  | C                                            | 3.86131400   | -1.75194800 | -0.41777800 |
| H | -2.29489600 | -2.17381700 | 2.21467300  | H                                            | 4.19410600   | -2.75022200 | -0.72217600 |
| C | 1.50043900  | -2.70104600 | 3.22493800  | H                                            | 3.51027300   | -1.24430400 | -1.32038000 |
| H | 1.36361500  | -1.99704500 | 1.17539300  | C                                            | 4.99772500   | -0.97587900 | 0.21012800  |
| H | 1.80395700  | -0.75516400 | 2.33538900  | C                                            | 6.08730500   | -1.62424100 | 0.81101900  |
| C | -5.16148200 | 1.74558800  | 1.24774200  | C                                            | 4.95341700   | 0.42886800  | 0.24790300  |
| H | -5.16276300 | 0.90146200  | 3.25463200  | C                                            | 7.10738600   | -0.89244100 | 1.43216400  |
| H | -5.08819000 | -0.29819400 | 1.96439100  | H                                            | 6.14023800   | -2.71135900 | 0.78910000  |

|   |             |             |             |                                              |              |             |             |
|---|-------------|-------------|-------------|----------------------------------------------|--------------|-------------|-------------|
| C | 5.96805400  | 1.16527100  | 0.86690400  | H                                            | -1.23567400  | 0.72974600  | 2.84378600  |
| H | 4.11558300  | 0.94620800  | -0.21684300 | H                                            | -2.50344800  | 1.81324900  | 2.29953500  |
| C | 7.05097700  | 0.50575000  | 1.46352700  | C                                            | 1.22834300   | 2.99563900  | 2.92626800  |
| H | 7.94633900  | -1.41329100 | 1.88813000  | H                                            | 1.20336200   | 1.04886300  | 1.96764600  |
| H | 5.91828800  | 2.25184600  | 0.88070600  | H                                            | 1.55633500   | 2.38029500  | 0.87773400  |
| H | 7.84334200  | 1.07568800  | 1.94284100  | C                                            | -5.31758000  | 1.17041500  | -1.77566400 |
| H | 0.87174500  | -3.16978700 | 1.87936700  | H                                            | -5.44999200  | 3.06437200  | -0.71017900 |
| H | -0.38881200 | -3.64768700 | 0.69284300  | H                                            | -5.30553700  | 1.65203100  | 0.33619200  |
| H | -0.36059200 | -1.30933800 | 2.64586600  | H                                            | -4.80737500  | -0.79905700 | -2.54769200 |
| C | -2.22082300 | -1.98704800 | 1.77798400  | H                                            | -4.92903900  | -0.71629200 | -0.79192200 |
| C | -2.98466400 | -1.48804900 | 2.85172900  | C                                            | 1.70228900   | 3.54804000  | -3.26257100 |
| C | -2.90076400 | -2.67899300 | 0.75226600  | H                                            | 0.22240200   | 5.09857500  | -2.88349300 |
| C | -4.37208900 | -1.65517100 | 2.89499200  | H                                            | -0.40964500  | 3.68267600  | -3.72088100 |
| H | -2.48705400 | -0.96887900 | 3.66758500  | H                                            | 2.85178300   | 1.70741000  | -3.41776400 |
| C | -4.28386600 | -2.85570300 | 0.80123800  | H                                            | 1.21214900   | 1.59050300  | -4.05061600 |
| H | -2.33640000 | -3.05689800 | -0.09601100 | C                                            | 0.34036700   | 2.65078700  | 4.13008900  |
| C | -5.03216700 | -2.34090000 | 1.86876800  | H                                            | -1.76995500  | 2.39741600  | 4.59748200  |
| H | -4.93608500 | -1.25749300 | 3.73586500  | H                                            | -1.42803600  | 3.71830300  | 3.48340100  |
| H | -4.78393400 | -3.38822700 | -0.00466900 | H                                            | 2.28828200   | 2.91285500  | 3.19482500  |
| H | -6.11069100 | -2.47466600 | 1.90037200  | H                                            | 1.05599400   | 4.04175700  | 2.63648500  |
| P | -0.86228500 | 0.99116700  | -0.11960000 | H                                            | -6.40146600  | 1.00500300  | -1.80159700 |
| C | -2.70508600 | 0.94741500  | -0.38308100 | H                                            | -5.05070900  | 1.66525400  | -2.72036200 |
| C | -0.12282900 | 1.87193700  | -1.60631200 | H                                            | 2.00309400   | 3.93957700  | -4.24196300 |
| C | -0.56437700 | 2.11896300  | 1.33598000  | H                                            | 2.39839900   | 3.97316300  | -2.52521300 |
| C | -3.42661000 | 2.30117400  | -0.51941800 | H                                            | 0.53762800   | 3.34034400  | 4.95951900  |
| C | -3.05718400 | 0.02128700  | -1.56651800 | H                                            | 0.59420200   | 1.64322700  | 4.48888700  |
| H | -3.06708800 | 0.45014000  | 0.52708500  | O                                            | 1.09748300   | -1.72577600 | -1.24926400 |
| C | -0.20233000 | 3.41418100  | -1.58382600 | B                                            | 0.37694900   | -2.46061800 | -2.45977200 |
| C | 1.32679800  | 1.42750800  | -1.90470000 | O                                            | 0.10433400   | -1.41151600 | -3.42217100 |
| H | -0.73839300 | 1.50305900  | -2.43715300 | H                                            | 0.86457700   | -1.34849300 | -4.01723200 |
| C | -1.43987300 | 1.76324700  | 2.55233800  | O                                            | -0.87222400  | -3.03441400 | -1.96132200 |
| C | 0.92991100  | 2.08506100  | 1.72470000  | H                                            | -1.58830000  | -2.63316300 | -2.47344500 |
| H | -0.82088700 | 3.13711400  | 1.01786900  | O                                            | 1.34188200   | -3.46516900 | -2.87090200 |
| C | -4.94897400 | 2.09433600  | -0.60446400 | H                                            | 0.84381700   | -4.23999800 | -3.16618100 |
| H | -3.09139000 | 2.80282300  | -1.43511800 |                                              |              |             |             |
| H | -3.18240800 | 2.96579200  | 0.31693900  |                                              |              |             |             |
| C | -4.57772900 | -0.17237300 | -1.67712600 |                                              |              |             |             |
| H | -2.67655400 | 0.44819700  | -2.50306800 |                                              |              |             |             |
| H | -2.55782900 | -0.94286100 | -1.43394400 |                                              |              |             |             |
| C | 0.27509400  | 4.00353000  | -2.92352800 |                                              |              |             |             |
| H | 0.44189600  | 3.79980100  | -0.78295500 |                                              |              |             |             |
| H | -1.21503500 | 3.76457500  | -1.36728300 |                                              |              |             |             |
| C | 1.81493900  | 2.01686800  | -3.23693000 |                                              |              |             |             |
| H | 1.98992500  | 1.76799800  | -1.09809300 |                                              |              |             |             |
| H | 1.38594600  | 0.34132700  | -1.93565000 |                                              |              |             |             |
| C | -1.14538400 | 2.68865300  | 3.74416500  |                                              |              |             |             |
|   |             |             |             | <b>dist-TS3<sup>B</sup>-toluene</b>          |              |             |             |
|   |             |             |             | Sum of electronic and thermal Free Energies= | -3541.179828 |             |             |
|   |             |             |             | Ni                                           | 0.53896800   | 0.72946400  | 0.42902800  |
|   |             |             |             | C                                            | -1.11155400  | 2.03020200  | 0.53490100  |
|   |             |             |             | H                                            | -1.69865200  | 1.71320800  | 1.39497600  |
|   |             |             |             | C                                            | 0.07801900   | 2.69707900  | 0.86073600  |
|   |             |             |             | H                                            | 0.29256800   | 2.79124800  | 1.92422500  |
|   |             |             |             | C                                            | -7.61119600  | 0.11584300  | -0.72981500 |
|   |             |             |             | C                                            | -6.23394600  | 0.20741100  | -0.96372800 |
|   |             |             |             | C                                            | -5.34197600  | 0.50331100  | 0.07922700  |

|   |             |             |             |                                              |             |              |             |
|---|-------------|-------------|-------------|----------------------------------------------|-------------|--------------|-------------|
| C | -5.86541900 | 0.70486100  | 1.36705800  | H                                            | 5.14605800  | -3.48358000  | -2.15604100 |
| C | -7.24054500 | 0.61418900  | 1.60799500  | H                                            | 5.39251400  | -2.10525100  | -1.08393100 |
| C | -8.12005300 | 0.31990100  | 0.55829100  | H                                            | 4.08175500  | 0.45915500   | -3.58784300 |
| H | -8.28539500 | -0.11831100 | -1.55052900 | H                                            | 4.74243000  | 0.31138500   | -1.96180900 |
| H | -5.84604800 | 0.04255300  | -1.96771100 | H                                            | 5.76282700  | -1.41087800  | -3.44116200 |
| H | -5.18816700 | 0.93132400  | 2.18921600  | H                                            | 4.16627700  | -2.00482600  | -3.89239400 |
| H | -7.62588200 | 0.76947200  | 2.61313100  | C                                            | -0.03142800 | -2.34950200  | -1.26700100 |
| H | -9.18899600 | 0.24662900  | 0.74331500  | C                                            | -0.02081500 | -3.87599000  | -1.02779400 |
| C | -3.85934000 | 0.64683900  | -0.18496600 | C                                            | -1.47918600 | -1.83112100  | -1.34655500 |
| C | -3.45812800 | 2.11358300  | -0.43525400 | H                                            | 0.42806000  | -2.16633900  | -2.24806100 |
| H | -3.57493700 | 0.05183600  | -1.05589100 | C                                            | -0.81559600 | -4.61037200  | -2.12183200 |
| H | -3.29182700 | 0.24718100  | 0.66238900  | H                                            | -0.47965800 | -4.09714900  | -0.05591800 |
| C | -1.96029100 | 2.32502500  | -0.70501700 | H                                            | 1.00061600  | -4.26575800  | -0.99103000 |
| H | -4.02517300 | 2.49547700  | -1.29456000 | C                                            | -2.28842800 | -2.57667000  | -2.41982600 |
| H | -3.75141100 | 2.73357600  | 0.42108700  | H                                            | -1.96936700 | -1.95760900  | -0.37176200 |
| H | -1.80394100 | 3.38703400  | -0.94299700 | H                                            | -1.47454800 | -0.76109800  | -1.55847300 |
| O | -1.51996400 | 1.53961800  | -1.83178400 | C                                            | -2.26007300 | -4.09680200  | -2.20714000 |
| B | 2.99666100  | 1.54709500  | 1.84083600  | H                                            | -0.80379400 | -5.68893400  | -1.92268000 |
| O | 2.38161100  | 1.64308500  | 3.11784500  | H                                            | -0.31763800 | -4.46259800  | -3.09048800 |
| H | 1.47843100  | 1.30170100  | 3.04017700  | H                                            | -3.32282600 | -2.21003000  | -2.42024200 |
| O | 2.38805300  | 1.12408200  | 0.73891300  | H                                            | -1.87053600 | -2.34178700  | -3.40928500 |
| H | -1.98334200 | 1.87617900  | -2.61675600 | H                                            | -2.79926400 | -4.60743500  | -3.01423900 |
| C | 0.87472400  | 3.60777100  | 0.01486700  | H                                            | -2.78451500 | -4.34055300  | -1.27237800 |
| C | 1.63243700  | 4.61146200  | 0.64728400  | C                                            | 1.21556100  | -2.36022300  | 1.45786700  |
| C | 0.94720100  | 3.50151600  | -1.38894400 | C                                            | 2.43196600  | -1.94404600  | 2.30871000  |
| C | 2.41328100  | 5.50040400  | -0.09453700 | C                                            | -0.08736900 | -2.23601000  | 2.27867300  |
| H | 1.61653400  | 4.68708700  | 1.73246500  | H                                            | 1.34858700  | -3.40938500  | 1.16894800  |
| C | 1.72822300  | 4.39010600  | -2.12950800 | C                                            | 2.50039300  | -2.75654300  | 3.61195900  |
| H | 0.42156800  | 2.69411900  | -1.88775800 | H                                            | 2.36323400  | -0.87885400  | 2.54626200  |
| C | 2.46089200  | 5.39814800  | -1.48977100 | H                                            | 3.35994100  | -2.07751700  | 1.74380300  |
| H | 2.99327900  | 6.26514200  | 0.41665800  | C                                            | -0.01409900 | -3.04226300  | 3.58431300  |
| H | 1.78108900  | 4.28488700  | -3.21107100 | H                                            | -0.25119400 | -1.17345500  | 2.50829200  |
| H | 3.07498100  | 6.08307400  | -2.06959100 | H                                            | -0.95139000 | -2.55920200  | 1.68705200  |
| H | -0.79461500 | 0.22021400  | 0.18901700  | C                                            | 1.20374500  | -2.63211500  | 4.42513400  |
| P | 1.05403900  | -1.34759600 | -0.09990600 | H                                            | 3.35702600  | -2.41842100  | 4.20685100  |
| C | 2.71978400  | -1.31694700 | -0.91815500 | H                                            | 2.67796800  | -3.81506200  | 3.37339800  |
| C | 3.31895500  | -2.68308400 | -1.29645900 | H                                            | -0.94005400 | -2.90501700  | 4.15611800  |
| C | 2.70089700  | -0.35631000 | -2.12682700 | H                                            | 0.05292600  | -4.11287200  | 3.34446300  |
| H | 3.34719500  | -0.83776200 | -0.16034700 | H                                            | 1.26221800  | -3.24281200  | 5.33413700  |
| C | 4.73714000  | -2.50681100 | -1.86878600 | H                                            | 1.08335500  | -1.58937800  | 4.75130500  |
| H | 2.69229000  | -3.17046800 | -2.05490600 | O                                            | 4.34892200  | 1.91448600   | 1.82846000  |
| H | 3.34761700  | -3.35223800 | -0.42797100 | H                                            | 4.62180600  | 2.16780900   | 2.72252400  |
| C | 4.11497300  | -0.19400400 | -2.70720300 |                                              |             |              |             |
| H | 2.03145500  | -0.74224200 | -2.90916300 |                                              |             |              |             |
| H | 2.31468200  | 0.61628000  | -1.80799800 | <b>prox-3</b>                                |             |              |             |
| C | 4.73956900  | -1.54991300 | -3.07133900 | Sum of electronic and thermal Free Energies= |             | -3696.953192 |             |

|    |             |             |             |   |             |             |             |
|----|-------------|-------------|-------------|---|-------------|-------------|-------------|
| Ni | -0.29463300 | -0.61828600 | -0.87565500 | H | -2.01012300 | 6.49311800  | -0.99613000 |
| C  | 4.33816200  | -2.81768400 | 2.15723300  | H | -2.43548500 | 6.73172900  | 1.44597400  |
| C  | 3.67497900  | -2.97675900 | 0.93506000  | B | 0.74601500  | 2.66392500  | -0.39678300 |
| C  | 2.49770300  | -2.26617800 | 0.64333700  | O | 1.32403500  | 1.81385900  | 0.52180700  |
| C  | 1.98938200  | -1.40669700 | 1.63269600  | H | 1.65366200  | 1.00531500  | 0.05770100  |
| C  | 2.64811800  | -1.23925100 | 2.85445200  | O | 0.82348800  | 2.43451400  | -1.75279000 |
| C  | 3.83043800  | -1.94015400 | 3.12318200  | H | 1.20289700  | 1.53055300  | -1.91260000 |
| H  | 5.25139100  | -3.37514700 | 2.35306100  | P | -2.37237500 | -0.87351200 | -0.18915800 |
| H  | 4.08784200  | -3.65456500 | 0.19038000  | C | -3.15778800 | -2.50665600 | -0.59434000 |
| H  | 1.07943100  | -0.85023700 | 1.44006000  | C | -4.58467400 | -2.70922100 | -0.04887800 |
| H  | 2.24074100  | -0.55613700 | 3.59620800  | C | -3.11260700 | -2.77673900 | -2.11439800 |
| H  | 4.34507700  | -1.80872400 | 4.07191300  | H | -2.49830100 | -3.24177700 | -0.11495400 |
| C  | 1.86235000  | -2.40107100 | -0.72757900 | C | -5.08865500 | -4.12887200 | -0.36340000 |
| H  | 2.22254300  | -3.34794300 | -1.15552800 | H | -5.25980600 | -1.98077300 | -0.51504700 |
| C  | 0.31785700  | -2.41826800 | -0.72063200 | H | -4.61980700 | -2.53200000 | 1.03146500  |
| H  | -0.05810200 | -2.88483700 | -1.64181700 | C | -3.61349500 | -4.19640100 | -2.42823700 |
| H  | -0.09565100 | -2.95386800 | 0.14027700  | H | -3.75088700 | -2.05368700 | -2.63852300 |
| C  | 7.70743000  | 1.33570200  | -1.87939000 | H | -2.09619800 | -2.63360000 | -2.49573600 |
| C  | 6.31573200  | 1.20713500  | -1.78967100 | C | -5.02614200 | -4.42801900 | -1.86933700 |
| C  | 5.72808100  | 0.32700700  | -0.86515500 | H | -6.11426500 | -4.24672500 | 0.00632200  |
| C  | 6.57349800  | -0.42360800 | -0.02970700 | H | -4.46959800 | -4.85671000 | 0.17916200  |
| C  | 7.96558800  | -0.29931300 | -0.11423000 | H | -3.60070600 | -4.36157200 | -3.51218300 |
| C  | 8.53915400  | 0.58130500  | -1.04120300 | H | -2.92131400 | -4.92663900 | -1.98689900 |
| H  | 8.14240900  | 2.02607600  | -2.59866000 | H | -5.34684800 | -5.45835300 | -2.06430300 |
| H  | 5.67654200  | 1.79979000  | -2.44207700 | H | -5.73273500 | -3.77106300 | -2.39579300 |
| H  | 6.13289900  | -1.10748100 | 0.69318800  | C | -3.49248100 | 0.43832600  | -0.94175500 |
| H  | 8.60236700  | -0.88569300 | 0.54463900  | C | -4.62059500 | 0.96133100  | -0.02682700 |
| H  | 9.61994800  | 0.68179400  | -1.10660500 | C | -2.64990100 | 1.60167000  | -1.50983600 |
| C  | 4.22681300  | 0.15250300  | -0.79842500 | H | -3.96445900 | -0.06940000 | -1.79254500 |
| C  | 3.73264900  | -0.89879700 | -1.81531700 | C | -5.48430500 | 2.00566200  | -0.75561400 |
| H  | 3.73085900  | 1.10418900  | -1.01252300 | H | -4.19255500 | 1.43285000  | 0.86444900  |
| H  | 3.93726500  | -0.13754600 | 0.21332000  | H | -5.24905400 | 0.13671200  | 0.32358700  |
| C  | 2.23885100  | -1.26214800 | -1.71384400 | C | -3.51788700 | 2.66403600  | -2.19989300 |
| H  | 3.93567100  | -0.51340700 | -2.82212800 | H | -2.08031000 | 2.07482600  | -0.70214200 |
| H  | 4.32640300  | -1.81506500 | -1.71104100 | H | -1.91346400 | 1.21362600  | -2.22469000 |
| H  | 1.92719400  | -1.63439900 | -2.70472300 | C | -4.63039700 | 3.17254600  | -1.27339600 |
| O  | 1.44008200  | -0.13495000 | -1.37636100 | H | -6.26268700 | 2.37178500  | -0.07535900 |
| C  | -1.18189600 | 5.05302200  | 1.98317900  | H | -5.99922300 | 1.52733800  | -1.60040500 |
| C  | -0.34758900 | 4.03512800  | 1.50802900  | H | -2.88112000 | 3.49422400  | -2.52641000 |
| C  | -0.09509200 | 3.88037500  | 0.13050700  | H | -3.96867000 | 2.22977300  | -3.10327500 |
| C  | -0.70653800 | 4.78624800  | -0.75841600 | H | -5.25928900 | 3.90116400  | -1.79904100 |
| C  | -1.54043800 | 5.80875800  | -0.29307600 | H | -4.17741900 | 3.69883400  | -0.42143400 |
| C  | -1.78142900 | 5.94285700  | 1.08121800  | C | -2.47081500 | -0.66306400 | 1.66057400  |
| H  | -1.37160900 | 5.15003200  | 3.04996800  | C | -1.88140100 | -1.87728300 | 2.40829600  |
| H  | 0.10147500  | 3.33591700  | 2.20914800  | C | -1.73373000 | 0.63311300  | 2.06922300  |
| H  | -0.53906200 | 4.67373900  | -1.82701500 | H | -3.52753600 | -0.57044900 | 1.93852100  |

|   |             |             |            |   |             |             |             |
|---|-------------|-------------|------------|---|-------------|-------------|-------------|
| C | -1.91749300 | -1.66042200 | 3.93069000 | C | -3.98994900 | 0.03673900  | 1.60428400  |
| H | -0.84334700 | -2.03147800 | 2.09250300 | H | -3.89712600 | 1.56574800  | 0.08484700  |
| H | -2.43038900 | -2.79109900 | 2.15720400 | H | -4.19708900 | -0.03971300 | -0.55868000 |
| C | -1.76712600 | 0.84381000  | 3.59016600 | C | -2.52091700 | -0.41779000 | 1.64064100  |
| H | -0.69221600 | 0.58253100  | 1.72889900 | H | -4.15245500 | 0.78761900  | 2.38659600  |
| H | -2.16572700 | 1.50575600  | 1.57029900 | H | -4.62625600 | -0.81825600 | 1.86050200  |
| C | -1.19294500 | -0.36859500 | 4.33654500 | H | -2.15462800 | -0.33910000 | 2.67368800  |
| H | -1.46723000 | -2.52478800 | 4.43329100 | O | -1.69868100 | 0.41067600  | 0.79990400  |
| H | -2.96405200 | -1.60957000 | 4.26190900 | C | 1.93418700  | 5.78821400  | -1.53740300 |
| H | -1.20732300 | 1.75179900  | 3.84460200 | C | 0.96400000  | 4.79856600  | -1.34198000 |
| H | -2.80527600 | 1.01075200  | 3.90967500 | C | 1.05199600  | 3.88848500  | -0.27020800 |
| H | -1.26341700 | -0.21821800 | 5.42051500 | C | 2.14172500  | 4.01779800  | 0.61297300  |
| H | -0.12511900 | -0.46558600 | 4.09874500 | C | 3.12140700  | 4.99874000  | 0.42351300  |

**prox-TS2**

Sum of electronic and thermal Free Energies= -3696.936068

|    |             |             |             |   |             |             |             |
|----|-------------|-------------|-------------|---|-------------|-------------|-------------|
| Ni | 0.07449100  | -0.34201400 | 0.60271800  | H | 2.22101300  | 3.32766300  | 1.44854600  |
| C  | -4.72249000 | -3.20012900 | -1.37615300 | H | 3.96164000  | 5.07207300  | 1.11068200  |
| C  | -4.07699000 | -2.90588100 | -0.16929700 | H | 3.78134600  | 6.64804900  | -0.81074100 |
| C  | -2.84341100 | -2.23372500 | -0.14523600 | B | 0.01189600  | 2.72143400  | -0.06670100 |
| C  | -2.25783300 | -1.88758500 | -1.37624700 | O | -1.00957900 | 2.60434400  | -1.01131500 |
| C  | -2.89719900 | -2.17822900 | -2.58552600 | H | -1.55428500 | 1.82092400  | -0.80432300 |
| C  | -4.13723400 | -2.83067500 | -2.59298000 | O | 0.12073600  | 1.85828100  | 0.98090200  |
| H  | -5.68057200 | -3.71494400 | -1.36522300 | H | -1.01889200 | 1.28067300  | 1.14414100  |
| H  | -4.54737100 | -3.19300000 | 0.76916900  | P | 2.15440000  | -0.86901800 | 0.14705000  |
| H  | -1.29720400 | -1.38092400 | -1.38863400 | C | 2.72588700  | 0.53014300  | -0.95238600 |
| H  | -2.42780300 | -1.89301900 | -3.52454000 | C | 4.23562800  | 0.55225200  | -1.25963200 |
| H  | -4.63573000 | -3.05413600 | -3.53313500 | C | 1.88986300  | 0.57394600  | -2.25291900 |
| C  | -2.21193700 | -1.86574100 | 1.18715500  | H | 2.48012800  | 1.42910100  | -0.37848900 |
| H  | -2.63836900 | -2.53833400 | 1.94542800  | C | 4.59706100  | 1.78082800  | -2.11268000 |
| C  | -0.67310400 | -2.00464400 | 1.20953300  | H | 4.51778600  | -0.35327300 | -1.81135300 |
| H  | -0.32749500 | -2.02901700 | 2.25368700  | H | 4.81927300  | 0.55681200  | -0.33255800 |
| H  | -0.34933300 | -2.92242500 | 0.72121300  | C | 2.28375100  | 1.76886100  | -3.13794400 |
| C  | -7.83374500 | 2.35207200  | 0.80237000  | H | 2.03623000  | -0.35164800 | -2.82446000 |
| C  | -6.45375100 | 2.11672500  | 0.76489800  | H | 0.82201300  | 0.62816100  | -2.01042100 |
| C  | -5.93865300 | 0.91209400  | 0.25693600  | C | 3.79255300  | 1.80005400  | -3.42075100 |
| C  | -6.84409900 | -0.05458800 | -0.21371500 | H | 5.67331200  | 1.77887000  | -2.32393500 |
| C  | -8.22493500 | 0.17497200  | -0.17936100 | H | 4.38327100  | 2.69340100  | -1.53937700 |
| C  | -8.72605600 | 1.38021800  | 0.33046800  | H | 1.71837900  | 1.72733500  | -4.07697900 |
| H  | -8.21230100 | 3.29303100  | 1.19531700  | H | 1.99510300  | 2.69702700  | -2.63418500 |
| H  | -5.76690000 | 2.87835800  | 1.13035200  | H | 4.04649800  | 2.68944600  | -4.01009600 |
| H  | -6.45969000 | -0.99147200 | -0.61237000 | H | 4.07101300  | 0.92635100  | -4.02725600 |
| H  | -8.90928500 | -0.58366600 | -0.55277700 | C | 2.69419700  | -2.40299000 | -0.80401400 |
| H  | -9.79790300 | 1.56176000  | 0.35562800  | C | 4.08197100  | -2.95738800 | -0.41207400 |
| C  | -4.45078200 | 0.63775400  | 0.25877600  | C | 1.64530600  | -3.53010200 | -0.82889100 |
|    |             |             |             | H | 2.77649400  | -2.03214300 | -1.83307600 |

|   |            |             |             |   |             |             |             |
|---|------------|-------------|-------------|---|-------------|-------------|-------------|
| C | 4.50439500 | -4.09320000 | -1.36062000 | C | -1.98750500 | -1.95526300 | 1.34994900  |
| H | 4.05158400 | -3.34476500 | 0.61315600  | H | -2.39333200 | -2.77778400 | 1.95592800  |
| H | 4.83912800 | -2.16819900 | -0.43057500 | C | -0.44983200 | -1.92909500 | 1.50891400  |
| C | 2.07519900 | -4.66680300 | -1.77037800 | H | -0.22165600 | -1.90940800 | 2.58872500  |
| H | 1.51288700 | -3.93124700 | 0.18385600  | H | -0.01605200 | -2.84366600 | 1.11112200  |
| H | 0.67779800 | -3.12909400 | -1.14507100 | C | -7.94154900 | 1.75181000  | 0.80134600  |
| C | 3.45920100 | -5.21711000 | -1.39780600 | C | -6.55218600 | 1.66010600  | 0.95219700  |
| H | 5.47894500 | -4.48618200 | -1.04686600 | C | -5.82790300 | 0.61779900  | 0.35043000  |
| H | 4.63766600 | -3.68549400 | -2.37235100 | C | -6.53038000 | -0.33417300 | -0.40830800 |
| H | 1.32493800 | -5.46627600 | -1.74648400 | C | -7.91908400 | -0.24735500 | -0.56266800 |
| H | 2.10099700 | -4.28739700 | -2.80159900 | C | -8.63104100 | 0.79667000  | 0.04297100  |
| H | 3.76366500 | -5.99614400 | -2.10702400 | H | -8.48448000 | 2.56881100  | 1.27109400  |
| H | 3.40488400 | -5.69176300 | -0.40800300 | H | -6.02344300 | 2.40861600  | 1.53988100  |
| C | 3.19005500 | -0.77415800 | 1.69381800  | H | -5.98161900 | -1.14588600 | -0.88204800 |
| C | 3.15371600 | 0.64660900  | 2.29471500  | H | -8.44493900 | -0.99075400 | -1.15764400 |
| C | 2.68986100 | -1.80377600 | 2.72923100  | H | -9.70930900 | 0.86763700  | -0.07816500 |
| H | 4.22687600 | -1.01321500 | 1.43162200  | C | -4.33295800 | 0.48951200  | 0.54794200  |
| C | 3.95413900 | 0.71722600  | 3.60591600  | C | -4.00260800 | -0.31563800 | 1.82429600  |
| H | 2.10976100 | 0.93740300  | 2.46748800  | H | -3.88052500 | 1.48311900  | 0.62742700  |
| H | 3.56564300 | 1.37125500  | 1.58599100  | H | -3.88796400 | 0.00715300  | -0.32390900 |
| C | 3.51678000 | -1.74068700 | 4.02255600  | C | -2.52083000 | -0.67082300 | 2.01420000  |
| H | 1.64293900 | -1.57984300 | 2.96427800  | H | -4.34945000 | 0.25709700  | 2.69229200  |
| H | 2.70856200 | -2.81852000 | 2.31647900  | H | -4.57279900 | -1.25110900 | 1.82477500  |
| C | 3.48260900 | -0.32883300 | 4.62633400  | H | -2.30747900 | -0.76529200 | 3.08467500  |
| H | 3.87374200 | 1.72647000  | 4.02777900  | O | -1.65312200 | 0.39242700  | 1.49524600  |
| H | 5.01775700 | 0.55089100  | 3.38468400  | C | 0.75281800  | 6.27744400  | -1.15175700 |
| H | 3.13241900 | -2.47400800 | 4.74169800  | C | 0.10148000  | 5.06138900  | -0.90686400 |
| H | 4.55655900 | -2.02230100 | 3.80534300  | C | 0.70482600  | 4.04382100  | -0.14178200 |
| H | 4.10261000 | -0.28422800 | 5.52981400  | C | 1.99098500  | 4.29636300  | 0.37590800  |
| H | 2.45370200 | -0.09554800 | 4.93438300  | C | 2.65358700  | 5.50604100  | 0.13774400  |

**prox-4**

Sum of electronic and thermal Free Energies= -3696.948911

|    |             |             |             |   |             |             |             |
|----|-------------|-------------|-------------|---|-------------|-------------|-------------|
| Ni | 0.19225400  | -0.19156100 | 0.95644000  | H | 2.47485900  | 3.51968900  | 0.96376800  |
| C  | -4.11935700 | -3.21293600 | -1.57189100 | H | 3.64932300  | 5.67412000  | 0.54354300  |
| C  | -3.58799000 | -3.02305900 | -0.29036300 | H | 2.54566800  | 7.44345000  | -0.82198700 |
| C  | -2.48481300 | -2.18106900 | -0.07236800 | B | 0.02184600  | 2.62882500  | 0.09961100  |
| C  | -1.91503700 | -1.54768400 | -1.19123700 | O | -1.21330000 | 2.44210900  | -0.56002100 |
| C  | -2.44016100 | -1.72993900 | -2.47346000 | H | -1.56597800 | 1.57193400  | -0.30447900 |
| C  | -3.55042100 | -2.56081400 | -2.67172200 | O | 0.61473800  | 1.70422600  | 0.85378800  |
| H  | -4.97784500 | -3.86637500 | -1.70882700 | H | -1.64646100 | 1.16825200  | 2.08384400  |
| H  | -4.04654400 | -3.53292200 | 0.55469600  | P | 2.12350300  | -0.79624600 | 0.10964600  |
| H  | -1.04931800 | -0.90452700 | -1.06331200 | C | 2.69736400  | 0.59251200  | -0.99835000 |
| H  | -1.98133100 | -1.22109700 | -3.31816700 | C | 4.15409600  | 0.52304300  | -1.49292400 |
| H  | -3.96173900 | -2.70200400 | -3.66819800 | C | 1.72552700  | 0.78228800  | -2.18380700 |
|    |             |             |             | H | 2.58570400  | 1.46998200  | -0.35742900 |

|   |            |             |             |                                                         |             |             |             |
|---|------------|-------------|-------------|---------------------------------------------------------|-------------|-------------|-------------|
| C | 4.50827200 | 1.79461500  | -2.28584900 | H                                                       | 3.13786900  | -0.45455000 | 4.86965800  |
| H | 4.29149800 | -0.34667500 | -2.14746800 |                                                         |             |             |             |
| H | 4.84757800 | 0.40625400  | -0.65251300 |                                                         |             |             |             |
| C | 2.08687100 | 2.03753900  | -2.99589000 | <b>prox-5</b>                                           |             |             |             |
| H | 1.76368900 | -0.09066700 | -2.84926800 | Sum of electronic and thermal Free Energies=-3696.93931 |             |             |             |
| H | 0.69802300 | 0.85738700  | -1.81459400 | Ni                                                      | -0.33185200 | -0.48065900 | -0.07945400 |
| C | 3.54841500 | 2.00230200  | -3.46739400 | C                                                       | 1.28798500  | -1.99990700 | -0.54261600 |
| H | 5.54411300 | 1.73227500  | -2.64153100 | C                                                       | -0.19844900 | -2.22452900 | -0.79704300 |
| H | 4.45217900 | 2.66296900  | -1.61487600 | H                                                       | -0.62248100 | -3.05653800 | -0.23022000 |
| H | 1.41047400 | 2.12777200  | -3.85487500 | C                                                       | 7.54712500  | 0.77968700  | -1.33241400 |
| H | 1.92677000 | 2.92378000  | -2.37051500 | C                                                       | 6.15725400  | 0.63485000  | -1.43016200 |
| H | 3.79741100 | 2.92848300  | -3.99972700 | C                                                       | 5.46179300  | -0.24038500 | -0.58036100 |
| H | 3.67949400 | 1.17910300  | -4.18437900 | C                                                       | 6.19344300  | -0.97067200 | 0.37201000  |
| C | 2.42787900 | -2.31347300 | -0.97712000 | C                                                       | 7.58222600  | -0.83031300 | 0.47454800  |
| C | 3.83960900 | -2.93045600 | -0.83818400 | C                                                       | 8.26534900  | 0.04652800  | -0.37922800 |
| C | 1.36230200 | -3.42358900 | -0.92078600 | H                                                       | 8.06775700  | 1.46604700  | -1.99630800 |
| H | 2.36636600 | -1.88327600 | -1.98433000 | H                                                       | 5.60566600  | 1.21031800  | -2.17140800 |
| C | 4.08545100 | -3.98353700 | -1.93343400 | H                                                       | 5.66822600  | -1.65162400 | 1.03988800  |
| H | 3.93817900 | -3.40855400 | 0.14355500  | H                                                       | 8.13073000  | -1.40041900 | 1.22089700  |
| H | 4.61701800 | -2.16464500 | -0.89523300 | H                                                       | 9.34384600  | 0.15964200  | -0.29958500 |
| C | 1.60535800 | -4.47356500 | -2.01775900 | C                                                       | 3.96703100  | -0.43324600 | -0.71196500 |
| H | 1.39660900 | -3.91841700 | 0.05763600  | C                                                       | 3.63305700  | -1.65565700 | -1.59086600 |
| H | 0.36323000 | -2.99669600 | -1.03213000 | H                                                       | 3.50582500  | 0.46244900  | -1.13682900 |
| C | 3.01177800 | -5.08069000 | -1.91765500 | H                                                       | 3.53807400  | -0.57163000 | 0.28585000  |
| H | 5.08231000 | -4.42134200 | -1.80096500 | C                                                       | 2.13644900  | -1.89559500 | -1.83067500 |
| H | 4.08529200 | -3.48688100 | -2.91379000 | H                                                       | 4.11851900  | -1.54025100 | -2.56869700 |
| H | 0.84300000 | -5.25898400 | -1.94793600 | H                                                       | 4.06386500  | -2.55633200 | -1.14120100 |
| H | 1.48175300 | -3.99969700 | -3.00182700 | H                                                       | 2.01668700  | -2.82345700 | -2.40449500 |
| H | 3.18155100 | -5.79113500 | -2.73576000 | O                                                       | 1.54293300  | -0.81015200 | -2.58032700 |
| H | 3.09246900 | -5.64972600 | -0.98075500 | C                                                       | 1.97361700  | 5.89929100  | 0.12234800  |
| C | 3.35267300 | -0.87839200 | 1.50927800  | C                                                       | 1.78002800  | 4.61058800  | -0.39271200 |
| C | 3.47126900 | 0.48331800  | 2.22511700  | C                                                       | 1.19077800  | 3.58852900  | 0.37879700  |
| C | 2.94984500 | -1.97324500 | 2.51930400  | C                                                       | 0.80813400  | 3.91151400  | 1.69596100  |
| H | 4.33181500 | -1.13369400 | 1.08838500  | C                                                       | 0.99678600  | 5.19413100  | 2.22392500  |
| C | 4.46489200 | 0.40662200  | 3.39619100  | C                                                       | 1.58070100  | 6.19539800  | 1.43493700  |
| H | 2.47946000 | 0.78125700  | 2.58659600  | H                                                       | 2.42847400  | 6.67204300  | -0.49446000 |
| H | 3.79155300 | 1.26133800  | 1.52489100  | H                                                       | 2.08848100  | 4.39047000  | -1.41247900 |
| C | 3.95697800 | -2.05892800 | 3.67681200  | H                                                       | 0.35559600  | 3.13576900  | 2.30787200  |
| H | 1.95976600 | -1.72855400 | 2.92016000  | H                                                       | 0.69047100  | 5.41593900  | 3.24450100  |
| H | 2.85605200 | -2.94770300 | 2.02768700  | H                                                       | 1.72852100  | 7.19489700  | 1.83847300  |
| C | 4.09424500 | -0.70493000 | 4.38921500  | B                                                       | 0.93534800  | 2.12386100  | -0.19085000 |
| H | 4.50477000 | 1.37649800  | 3.90701000  | O                                                       | 1.40919700  | 1.91764500  | -1.49829200 |
| H | 5.47247600 | 0.21637400  | 3.00030800  | H                                                       | 1.29721900  | 0.98813100  | -1.77959000 |
| H | 3.63960100 | -2.83325400 | 4.38581800  | O                                                       | 0.31266900  | 1.20731500  | 0.55647100  |
| H | 4.93633200 | -2.36817800 | 3.28558300  | H                                                       | 2.00711300  | -0.73407400 | -3.43054300 |
| H | 4.84371200 | -0.76735100 | 5.18755600  | H                                                       | 1.42215000  | -0.95751400 | -0.10579800 |

|   |             |             |             |                                                          |             |             |             |
|---|-------------|-------------|-------------|----------------------------------------------------------|-------------|-------------|-------------|
| H | -0.45532200 | -2.29591800 | -1.85777500 | H                                                        | -4.13663700 | 3.27145300  | -3.05140300 |
| C | 1.85048000  | -2.91982100 | 0.52479900  | C                                                        | -3.01876300 | 0.84773300  | 1.30685600  |
| C | 2.21846100  | -4.24131500 | 0.22426300  | C                                                        | -2.38074100 | 0.34703700  | 2.62390800  |
| C | 1.96561400  | -2.47070200 | 1.84830100  | C                                                        | -2.69201400 | 2.33928000  | 1.09288900  |
| C | 2.70906100  | -5.08745400 | 1.22399500  | H                                                        | -4.10913700 | 0.74931500  | 1.37680500  |
| H | 2.12338000  | -4.61403500 | -0.79274800 | C                                                        | -2.85715700 | 1.17851300  | 3.82484000  |
| C | 2.45140600  | -3.31616600 | 2.85254700  | H                                                        | -1.29134800 | 0.42775600  | 2.52277600  |
| H | 1.66825900  | -1.45193600 | 2.09176300  | H                                                        | -2.60649300 | -0.71202600 | 2.79359000  |
| C | 2.82934600  | -4.62774600 | 2.54265200  | C                                                        | -3.15403100 | 3.17813600  | 2.29800000  |
| H | 2.99566100  | -6.10632700 | 0.97473700  | H                                                        | -1.61498700 | 2.44893600  | 0.94901800  |
| H | 2.53543500  | -2.95011200 | 3.87292500  | H                                                        | -3.18504300 | 2.71611800  | 0.19258400  |
| H | 3.21098800  | -5.28619200 | 3.31895100  | C                                                        | -2.56024900 | 2.67093000  | 3.62030600  |
| P | -2.46836200 | -0.28365700 | -0.06975400 | H                                                        | -2.37478400 | 0.81499500  | 4.74039600  |
| C | -3.39117400 | -1.89618000 | 0.24991400  | H                                                        | -3.93892200 | 1.03537200  | 3.95759700  |
| C | -4.73712600 | -1.80643900 | 1.00365200  | H                                                        | -2.87594500 | 4.22678700  | 2.13590100  |
| C | -3.57085400 | -2.72798500 | -1.03983600 | H                                                        | -4.25129600 | 3.14740500  | 2.36132800  |
| H | -2.68995800 | -2.43978600 | 0.89537300  | H                                                        | -2.95205500 | 3.25632200  | 4.46124000  |
| C | -5.27855400 | -3.21381200 | 1.31678400  | H                                                        | -1.47289200 | 2.82107600  | 3.61033900  |
| H | -5.47175300 | -1.26144300 | 0.39876800  |                                                          |             |             |             |
| H | -4.63005000 | -1.25706900 | 1.94234000  |                                                          |             |             |             |
| C | -4.09444000 | -4.13742100 | -0.71913000 | <b>prox-TS3</b>                                          |             |             |             |
| H | -4.29398500 | -2.22823800 | -1.69661000 | Sum of electronic and thermal Free Energies=-3696.920667 |             |             |             |
| H | -2.63327700 | -2.79756900 | -1.59603300 | Ni                                                       | -0.47662000 | -0.59368400 | -0.74955200 |
| C | -5.41973300 | -4.07331000 | 0.05302400  | C                                                        | 1.11232500  | -1.94460200 | -1.28119700 |
| H | -6.24396200 | -3.12633300 | 1.82964500  | C                                                        | -0.10782700 | -2.16191800 | -1.93861100 |
| H | -4.59196400 | -3.70921000 | 2.01736700  | H                                                        | -0.76801200 | -2.96500700 | -1.62547900 |
| H | -4.22081300 | -4.70276600 | -1.65027300 | C                                                        | 7.84050500  | -0.80052800 | -0.13137700 |
| H | -3.34498600 | -4.67333400 | -0.12044800 | C                                                        | 6.71450200  | -1.12100900 | -0.89714200 |
| H | -5.75831700 | -5.08263100 | 0.31625300  | C                                                        | 5.90635400  | -0.11326700 | -1.45251500 |
| H | -6.19270000 | -3.63786600 | -0.59572200 | C                                                        | 6.25945200  | 1.22567600  | -1.22273500 |
| C | -3.08391900 | 0.37626800  | -1.70120700 | C                                                        | 7.38497100  | 1.55351900  | -0.45530500 |
| C | -4.55603200 | 0.83743000  | -1.70227900 | C                                                        | 8.17936500  | 0.54093300  | 0.09529300  |
| C | -2.13918700 | 1.45275100  | -2.28213400 | H                                                        | 8.45460800  | -1.59474100 | 0.28684600  |
| H | -3.00356500 | -0.49312800 | -2.36610000 | H                                                        | 6.45977600  | -2.16548400 | -1.06819800 |
| C | -4.99159600 | 1.28556300  | -3.10859000 | H                                                        | 5.65301100  | 2.01986700  | -1.65299100 |
| H | -4.68688200 | 1.67161200  | -1.00334600 | H                                                        | 7.64058700  | 2.59763400  | -0.29013500 |
| H | -5.21078200 | 0.03172500  | -1.35573500 | H                                                        | 9.05416400  | 0.79208300  | 0.69014300  |
| C | -2.59984900 | 1.88651300  | -3.68252700 | C                                                        | 4.66413000  | -0.47071800 | -2.24201600 |
| H | -2.10638000 | 2.32841800  | -1.62656500 | C                                                        | 3.53485900  | -0.98827800 | -1.33150000 |
| H | -1.11726000 | 1.06307900  | -2.32197700 | H                                                        | 4.90561500  | -1.24206900 | -2.98522700 |
| C | -4.05868300 | 2.36763500  | -3.67208400 | H                                                        | 4.31783100  | 0.41070600  | -2.79118200 |
| H | -6.02530700 | 1.65010000  | -3.07340800 | C                                                        | 2.28479200  | -1.39211800 | -2.12009300 |
| H | -4.98430700 | 0.41570600  | -3.78017500 | H                                                        | 3.89735700  | -1.85829800 | -0.77583900 |
| H | -1.93840500 | 2.67674500  | -4.05764800 | H                                                        | 3.28242800  | -0.22092000 | -0.59652400 |
| H | -2.50408700 | 1.03727400  | -4.37380400 | H                                                        | 2.56374500  | -2.22107100 | -2.78872900 |
| H | -4.37414500 | 2.64948600  | -4.68391400 | O                                                        | 1.77707400  | -0.30213700 | -2.90692300 |



|   |             |             |             |                                                          |             |             |             |
|---|-------------|-------------|-------------|----------------------------------------------------------|-------------|-------------|-------------|
| C | -7.00990000 | -2.49137200 | -0.60621100 | H                                                        | 1.66539500  | 5.02228900  | 2.74721200  |
| C | -5.63327000 | -2.58442000 | -0.36160300 | H                                                        | 1.31496000  | 5.22344000  | 1.03142100  |
| C | -4.72760600 | -1.63959400 | -0.88441600 | H                                                        | 3.95445500  | 2.72219200  | -0.10908100 |
| C | -5.25863700 | -0.59293700 | -1.66464100 | H                                                        | 2.72955500  | 3.83478700  | -0.71599200 |
| C | -6.63181000 | -0.48726300 | -1.91456800 | H                                                        | 3.74195600  | 4.77314900  | 1.34392900  |
| C | -7.51366900 | -1.44002600 | -1.38435800 | H                                                        | 3.37549000  | 3.29497900  | 2.23193900  |
| H | -7.68998400 | -3.23286800 | -0.19155000 | C                                                        | -1.28454200 | 0.84720900  | 2.19660100  |
| H | -5.25277900 | -3.40142800 | 0.24785900  | C                                                        | -2.67877300 | 0.19772000  | 2.30427700  |
| H | -4.57331600 | 0.14538600  | -2.07305900 | C                                                        | -0.21572400 | -0.08701500 | 2.80133000  |
| H | -7.01669900 | 0.33225900  | -2.51846300 | H                                                        | -1.30229700 | 1.78154100  | 2.76863700  |
| H | -8.58207100 | -1.36331300 | -1.57470300 | C                                                        | -3.00534900 | -0.16595500 | 3.76251100  |
| B | -3.16585800 | -1.69848800 | -0.60269100 | H                                                        | -2.70399600 | -0.70959100 | 1.69423200  |
| O | -2.75400900 | -2.76375200 | 0.23107300  | H                                                        | -3.45109700 | 0.86712100  | 1.91246900  |
| H | -1.79884500 | -2.68645700 | 0.39225000  | C                                                        | -0.53944500 | -0.45499000 | 4.25666600  |
| O | -2.34951700 | -0.77878200 | -1.10828200 | H                                                        | -0.17506900 | -1.00201000 | 2.19742100  |
| H | 2.29189600  | -0.25588200 | -3.72761500 | H                                                        | 0.77981500  | 0.36804200  | 2.74259000  |
| H | 0.93890500  | -0.41786400 | -0.42532200 | C                                                        | -1.93524800 | -1.08558300 | 4.36941800  |
| P | -0.81477700 | 1.25709200  | 0.43732100  | H                                                        | -3.99027500 | -0.64644900 | 3.80639100  |
| C | -2.26726000 | 2.15428700  | -0.30133500 | H                                                        | -3.07416500 | 0.75445100  | 4.35940800  |
| C | -2.71463500 | 3.42702800  | 0.44130300  | H                                                        | 0.22416700  | -1.14301000 | 4.63970600  |
| C | -2.01469400 | 2.43807700  | -1.79765300 | H                                                        | -0.49479400 | 0.44957900  | 4.87917700  |
| H | -3.06734900 | 1.40805000  | -0.25736800 | H                                                        | -2.17122000 | -1.30567700 | 5.41758300  |
| C | -3.96450900 | 4.03131600  | -0.22257900 | H                                                        | -1.93994100 | -2.04510000 | 3.83332300  |
| H | -1.91100800 | 4.17413200  | 0.41911800  | H                                                        | -0.24321300 | -1.79608200 | -2.95372800 |
| H | -2.91982100 | 3.21138500  | 1.49611000  | C                                                        | 1.47278900  | -2.86466400 | -0.13996100 |
| C | -3.25406200 | 3.06689200  | -2.45631600 | C                                                        | 1.93905000  | -2.39177900 | 1.09793400  |
| H | -1.16577600 | 3.12528400  | -1.91513600 | C                                                        | 1.36709700  | -4.25354300 | -0.32761800 |
| H | -1.74966100 | 1.50278900  | -2.30113800 | C                                                        | 2.27858200  | -3.27683400 | 2.12335200  |
| C | -3.71750500 | 4.32718900  | -1.70984400 | H                                                        | 2.02560700  | -1.32346000 | 1.26256600  |
| H | -4.25892200 | 4.94662500  | 0.30534600  | C                                                        | 1.70931700  | -5.14453800 | 0.69673500  |
| H | -4.80037000 | 3.32449700  | -0.12566400 | H                                                        | 1.01784300  | -4.63899300 | -1.28195500 |
| H | -3.03715000 | 3.30203200  | -3.50551700 | C                                                        | 2.16400900  | -4.65952500 | 1.92808000  |
| H | -4.07007100 | 2.33217700  | -2.45930400 | H                                                        | 2.62469800  | -2.88609500 | 3.07714200  |
| H | -4.62642900 | 4.72999200  | -2.17316100 | H                                                        | 1.61864700  | -6.21528600 | 0.53138500  |
| H | -2.94515700 | 5.10457500  | -1.79788700 | H                                                        | 2.42422000  | -5.34961200 | 2.72678800  |
| C | 0.52866300  | 2.57484200  | 0.53631300  |                                                          |             |             |             |
| C | 0.58987000  | 3.36161600  | 1.86394200  |                                                          |             |             |             |
| C | 1.92117400  | 2.03474700  | 0.16298800  |                                                          |             |             |             |
| H | 0.24271700  | 3.28532400  | -0.25030700 |                                                          |             |             |             |
| C | 1.63127600  | 4.49170100  | 1.78793300  | <b>prox-6</b>                                            |             |             |             |
| H | 0.86621500  | 2.68533900  | 2.68211600  | Sum of electronic and thermal Free Energies=-3696.923988 |             |             |             |
| H | -0.38805500 | 3.78207700  | 2.11665600  | Ni                                                       | -0.38391300 | -0.40795900 | -0.99577700 |
| C | 2.97212800  | 3.15447700  | 0.11251500  | C                                                        | 0.88235900  | -2.03499200 | -1.89692500 |
| H | 2.22935600  | 1.28328400  | 0.90283100  | C                                                        | -0.23418600 | -1.73328300 | -2.64006800 |
| H | 1.86999500  | 1.52437000  | -0.80275700 | H                                                        | -1.14953600 | -2.30289100 | -2.52624200 |
| C | 3.02099500  | 3.95056500  | 1.42399600  | C                                                        | 7.22907600  | -1.22565500 | 1.02831000  |
|   |             |             |             | C                                                        | 6.41144400  | -1.47931800 | -0.07987300 |
|   |             |             |             | C                                                        | 5.57626500  | -0.47927800 | -0.60455200 |

|   |             |             |             |   |             |             |             |
|---|-------------|-------------|-------------|---|-------------|-------------|-------------|
| C | 5.57962200  | 0.78414400  | 0.01066200  | H | -4.24311100 | 4.82188000  | 0.88998700  |
| C | 6.39298900  | 1.04343900  | 1.11990000  | H | -4.73287500 | 3.14878000  | 0.62096000  |
| C | 7.22168000  | 0.03766000  | 1.63419900  | H | -3.91171700 | 3.17340600  | -3.09630900 |
| H | 7.87175100  | -2.01183600 | 1.41778500  | H | -4.56327500 | 2.16336100  | -1.81038900 |
| H | 6.42157000  | -2.46433100 | -0.54320200 | H | -5.21409700 | 4.51452000  | -1.40879400 |
| H | 4.94164100  | 1.57230800  | -0.38270300 | H | -3.52878700 | 5.02700000  | -1.48420500 |
| H | 6.38182100  | 2.02899700  | 1.57973000  | C | 0.65056500  | 2.84352900  | -0.22911000 |
| H | 7.85631800  | 0.23657900  | 2.49435700  | C | 0.95237100  | 3.78056000  | 0.96354500  |
| C | 4.63948700  | -0.77144900 | -1.75789200 | C | 1.96476300  | 2.36837300  | -0.88145300 |
| C | 3.28905300  | -1.30278700 | -1.24288700 | H | 0.11834100  | 3.43862500  | -0.98224400 |
| H | 5.09129500  | -1.50575000 | -2.43638900 | C | 1.81912600  | 4.97230600  | 0.52018000  |
| H | 4.47392400  | 0.14692200  | -2.33048700 | H | 1.49108400  | 3.22814000  | 1.74172300  |
| C | 2.27440400  | -1.58581300 | -2.36113600 | H | 0.03055000  | 4.14935800  | 1.42141600  |
| H | 3.46585500  | -2.22291800 | -0.67782600 | C | 2.83465000  | 3.55950000  | -1.31347200 |
| H | 2.86099300  | -0.57134600 | -0.55256000 | H | 2.52396900  | 1.75546700  | -0.16283900 |
| H | 2.65381800  | -2.43732700 | -2.95022700 | H | 1.75419400  | 1.72085800  | -1.73693200 |
| O | 2.11570000  | -0.45277700 | -3.22743100 | C | 3.12462400  | 4.50551400  | -0.13987700 |
| C | -6.62406800 | -2.38690100 | 0.91940100  | H | 2.03460800  | 5.60888200  | 1.38686800  |
| C | -5.23581800 | -2.49643300 | 0.76159900  | H | 1.25061400  | 5.58698400  | -0.19157700 |
| C | -4.51671700 | -1.61001400 | -0.06521000 | H | 3.77065700  | 3.19229200  | -1.75258600 |
| C | -5.24864100 | -0.60829500 | -0.73232800 | H | 2.31416900  | 4.11413500  | -2.10691200 |
| C | -6.63531000 | -0.48749100 | -0.58476700 | H | 3.70986700  | 5.36867500  | -0.47922700 |
| C | -7.32879800 | -1.37966400 | 0.24570100  | H | 3.73784000  | 3.97912600  | 0.60566600  |
| H | -7.15733100 | -3.08170600 | 1.56541300  | C | -0.47168200 | 1.12842300  | 1.97447700  |
| H | -4.69763700 | -3.27991000 | 1.29086200  | C | -1.63772800 | 0.23017900  | 2.43585000  |
| H | -4.70625400 | 0.08181200  | -1.37237400 | C | 0.87940400  | 0.47479800  | 2.33291700  |
| H | -7.17577700 | 0.29712700  | -1.11103000 | H | -0.54561500 | 2.09284800  | 2.49117300  |
| H | -8.40635400 | -1.29086000 | 0.36679700  | C | -1.53915900 | -0.08709200 | 3.93670400  |
| B | -2.93665800 | -1.68012100 | -0.23971200 | H | -1.61465500 | -0.70497500 | 1.86616800  |
| O | -2.32452800 | -2.74681900 | 0.45595300  | H | -2.60060500 | 0.70600300  | 2.22292400  |
| H | -1.36479500 | -2.72673300 | 0.30426800  | C | 0.97658000  | 0.15852200  | 3.83290900  |
| O | -2.28984600 | -0.77836100 | -0.97043900 | H | 0.96904600  | -0.45461100 | 1.76182800  |
| H | 2.86369600  | -0.44101300 | -3.84424000 | H | 1.71863700  | 1.10766600  | 2.02811800  |
| H | 0.98200300  | -0.01225300 | -0.80425500 | C | -0.18980500 | -0.72977200 | 4.28959600  |
| P | -0.56041200 | 1.44875100  | 0.14272400  | H | -2.36458000 | -0.74981500 | 4.22336500  |
| C | -2.23791200 | 2.18822100  | -0.19405500 | H | -1.66142300 | 0.84050900  | 4.51336800  |
| C | -2.58820500 | 3.44422100  | 0.62502800  | H | 1.93585400  | -0.33001300 | 4.04241800  |
| C | -2.41879000 | 2.43575400  | -1.70784000 | H | 0.96650600  | 1.09764700  | 4.40340500  |
| H | -2.92244900 | 1.37644800  | 0.07317000  | H | -0.12677300 | -0.91777000 | 5.36817700  |
| C | -4.01639000 | 3.92065700  | 0.30735000  | H | -0.11452200 | -1.70648200 | 3.79080300  |
| H | -1.89057200 | 4.25466700  | 0.38056700  | H | -0.15794900 | -1.07151000 | -3.49840600 |
| H | -2.49047800 | 3.24886300  | 1.69890200  | C | 0.81334900  | -3.17136800 | -0.91838100 |
| C | -3.83274300 | 2.95303600  | -2.02471800 | C | 1.16270600  | -3.01902900 | 0.43564600  |
| H | -1.69058900 | 3.17840600  | -2.05992800 | C | 0.35451600  | -4.42832100 | -1.35238400 |
| H | -2.22386500 | 1.50355000  | -2.24754700 | C | 1.03919600  | -4.08192800 | 1.33413800  |
| C | -4.18689300 | 4.19552600  | -1.19417300 | H | 1.50365700  | -2.05405300 | 0.78841900  |

|   |             |             |             |   |             |             |             |
|---|-------------|-------------|-------------|---|-------------|-------------|-------------|
| C | 0.23970700  | -5.49737300 | -0.45708600 | H | -3.81762500 | 2.10123000  | 0.03580900  |
| H | 0.08239900  | -4.56463400 | -2.39567400 | C | -6.08426700 | -1.86427300 | 0.95311000  |
| C | 0.57747900  | -5.32747400 | 0.89080500  | H | -5.16022800 | -1.06604800 | -0.82350300 |
| H | 1.29404500  | -3.93236200 | 2.38028100  | H | -5.45835200 | 0.14787700  | 0.41990100  |
| H | -0.12009000 | -6.45983600 | -0.81204200 | C | -4.18775600 | -3.51963600 | 1.24461900  |
| H | 0.47800300  | -6.15485000 | 1.58863300  | H | -3.14526100 | -2.77170100 | -0.50068200 |

**prox-TS1-2**

Sum of electronic and thermal Free Energies=-3696.907014

|    |             |             |             |   |             |             |             |
|----|-------------|-------------|-------------|---|-------------|-------------|-------------|
| C  | -0.37866300 | -0.18106000 | 2.47644500  | C | -1.40029200 | 0.11078300  | -4.02879600 |
| C  | 0.99944800  | -0.76448700 | 2.23689000  | H | -0.94535800 | 1.36928400  | -2.33114000 |
| Ni | -0.44211000 | -0.43022700 | 0.64078100  | H | -0.48208600 | -0.30737200 | -2.10793300 |
| C  | 1.72137000  | -0.65663500 | 0.55953200  | C | -3.69611800 | 3.31082800  | 2.54546200  |
| H  | 2.56426900  | -1.31020300 | 0.79067000  | H | -2.53294400 | 1.49812200  | 2.74322000  |
| C  | 2.17999100  | 0.75880000  | 0.19629900  | H | -4.21483000 | 1.22719100  | 2.30207400  |
| H  | 2.85635900  | 1.13795300  | 0.96413200  | C | -2.15414500 | 4.24069100  | 0.77176500  |
| H  | 1.32165300  | 1.44148300  | 0.16670800  | H | -0.89684700 | 2.47938500  | 0.86165700  |
| C  | 2.88472500  | 0.79429000  | -1.17446400 | H | -1.55331100 | 2.80504200  | -0.73606300 |
| H  | 3.78834500  | 0.17645800  | -1.13464800 | C | -5.63063400 | -3.31880500 | 0.75745700  |
| H  | 2.22284200  | 0.34003600  | -1.91596900 | H | -7.09945100 | -1.72442800 | 0.56306200  |
| C  | 3.22256900  | 2.21256500  | -1.57436900 | H | -6.12087000 | -1.63352200 | 2.02674800  |
| C  | 4.49142000  | 2.76066200  | -1.32798700 | H | -3.85925600 | -4.54846600 | 1.05594300  |
| C  | 2.24216000  | 3.03363300  | -2.15946600 | H | -4.14832800 | -3.36738800 | 2.33197600  |
| C  | 4.77731400  | 4.09176200  | -1.65890600 | C | -2.51529500 | 0.97665400  | -4.63307400 |
| H  | 5.26207500  | 2.13986300  | -0.87459900 | H | -4.61789200 | 1.42587300  | -4.29992300 |
| C  | 2.52089600  | 4.36392800  | -2.49144100 | H | -4.19515500 | -0.26983900 | -4.07104000 |
| H  | 1.25280200  | 2.62368400  | -2.35672700 | H | -0.44223300 | 0.32389900  | -4.51848800 |
| C  | 3.79230200  | 4.89909200  | -2.24169300 | H | -1.62151400 | -0.95003200 | -4.21338000 |
| H  | 5.76752000  | 4.49719700  | -1.46389200 | C | -2.54471300 | 4.28400400  | 2.25557400  |
| H  | 1.75025300  | 4.98177200  | -2.94684400 | H | -3.94840200 | 3.32183600  | 3.61249500  |
| H  | 4.01276500  | 5.93179400  | -2.50092300 | H | -4.59353000 | 3.64076700  | 2.00394400  |
| H  | 0.96886800  | -1.85025000 | 2.33397200  | H | -1.30372000 | 4.90520400  | 0.57788700  |
| H  | -0.40974100 | 0.83632700  | 2.86596500  | H | -2.99155200 | 4.60977700  | 0.16362000  |
| P  | -2.42791000 | 0.11371800  | 0.07755000  | H | -6.30658700 | -4.00178600 | 1.28556700  |
| C  | -3.68206500 | -1.07764800 | 0.76188000  | H | -5.69106600 | -3.57414200 | -0.30978500 |
| C  | -2.60808600 | 0.07599800  | -1.79393400 | H | -2.63113000 | 0.75953000  | -5.70174600 |
| C  | -2.94207000 | 1.81766200  | 0.63150800  | H | -2.23109200 | 2.03536700  | -4.55296400 |
| C  | -5.12491300 | -0.88332600 | 0.25731600  | H | -2.82653200 | 5.30302800  | 2.54626100  |
| C  | -3.21785300 | -2.53671800 | 0.56882400  | H | -1.67393500 | 4.00758000  | 2.86678100  |
| H  | -3.66174800 | -0.87665200 | 1.84076900  | O | 0.96981700  | -1.20171800 | -0.49857500 |
| C  | -3.70204900 | 0.99213200  | -2.38409600 | B | 1.04738100  | -2.78320600 | -0.77222800 |
| C  | -1.26457000 | 0.33492900  | -2.51462600 | C | 2.59184200  | -3.06331900 | -1.18373900 |
| H  | -2.88837900 | -0.96743300 | -1.99478900 | C | 3.11705500  | -2.59058100 | -2.40291200 |
| C  | -3.35064900 | 1.87355600  | 2.11840200  | C | 3.48399800  | -3.73603000 | -0.32738900 |
| C  | -1.79871100 | 2.81269800  | 0.33119500  | C | 4.45912500  | -2.77707300 | -2.75581400 |

|   |             |             |             |   |             |             |             |
|---|-------------|-------------|-------------|---|-------------|-------------|-------------|
| H | 2.47327600  | -2.04587500 | -3.09353200 | C | 8.44250700  | -1.37533700 | -0.31996200 |
| C | 4.83178000  | -3.93107200 | -0.66433100 | H | 8.70078600  | -1.75996200 | 1.79070400  |
| H | 3.11433100  | -4.11159600 | 0.62466000  | H | 7.85737500  | -1.04453300 | -2.37422000 |
| C | 5.32626500  | -3.45046500 | -1.88325300 | H | 9.50266200  | -1.22429800 | -0.50878700 |
| H | 4.83200300  | -2.39508300 | -3.70449400 | H | -0.35859200 | 0.60216500  | 2.76193300  |
| H | 5.49567200  | -4.45309800 | 0.02266000  | H | -0.39587500 | 1.99029800  | 1.61616000  |
| H | 6.37094200  | -3.59594400 | -2.15003000 | H | 1.97669300  | 0.72402200  | 2.54017400  |
| O | 0.04987400  | -2.99681500 | -1.81581900 | C | 2.09755100  | 1.96781800  | 0.79418300  |
| H | 0.25415800  | -2.46147200 | -2.59596500 | C | 3.11430400  | 2.75137000  | 1.36527700  |
| O | 0.68017700  | -3.50463700 | 0.43066800  | C | 1.67425100  | 2.28533600  | -0.50923900 |
| H | -0.27995100 | -3.41992800 | 0.53891500  | C | 3.68504500  | 3.82055000  | 0.66424200  |
| H | -1.06171900 | -0.83741800 | 3.02232500  | H | 3.46543200  | 2.52262400  | 2.36959700  |
| C | 2.12351000  | -0.21265400 | 3.08815600  | C | 2.24041600  | 3.35046000  | -1.21531700 |
| C | 2.19629900  | 1.13144000  | 3.49230100  | H | 0.89846600  | 1.68785100  | -0.97880000 |
| C | 3.15807100  | -1.08137200 | 3.47489300  | C | 3.25029400  | 4.12652700  | -0.63145400 |
| C | 3.27155200  | 1.59185800  | 4.25771100  | H | 4.46886100  | 4.41365000  | 1.12996000  |
| H | 1.42272900  | 1.83360800  | 3.19531300  | H | 1.89478000  | 3.57333700  | -2.22239700 |
| C | 4.23483900  | -0.62498600 | 4.24389000  | H | 3.69180100  | 4.95644300  | -1.17781100 |
| H | 3.12014400  | -2.12609800 | 3.17227800  | P | -2.26421200 | -0.20148400 | 0.02409700  |
| C | 4.29689000  | 0.71610700  | 4.63919300  | C | -3.28694700 | 0.15317200  | 1.53833200  |
| H | 3.30991900  | 2.63704600  | 4.55517600  | C | -4.79884900 | 0.35335000  | 1.32047800  |
| H | 5.02155000  | -1.31722600 | 4.53406800  | C | -3.03468500 | -0.90330400 | 2.63572300  |
| H | 5.13100000  | 1.07481500  | 5.23700500  | H | -2.86548700 | 1.09961600  | 1.90070200  |

**prox-TS1-3**

Sum of electronic and thermal Free Energies=-3288.653145

|    |             |             |             |   |             |             |             |
|----|-------------|-------------|-------------|---|-------------|-------------|-------------|
| C  | -0.01493800 | 0.98240900  | 1.79334000  | C | -3.71047300 | -0.48771600 | 3.95288800  |
| C  | 1.49088600  | 0.82125400  | 1.56538300  | H | -3.44414400 | -1.87126200 | 2.31914100  |
| Ni | -0.18295600 | -0.28122000 | 0.43843200  | H | -1.95866700 | -1.04776400 | 2.78149000  |
| C  | 2.01968000  | -0.74659600 | 0.93252200  | C | -5.21572100 | -0.24659500 | 3.75690700  |
| O  | 1.39488500  | -1.27723600 | -0.18088800 | H | -6.55813300 | 0.88677300  | 2.47341100  |
| H  | 1.86880700  | -1.37715800 | 1.83196300  | H | -5.09725400 | 1.75561200  | 2.93988400  |
| C  | 3.52743000  | -0.57491500 | 0.70486800  | H | -3.54446800 | -1.25935700 | 4.71413100  |
| H  | 3.99772900  | -0.09931800 | 1.57458400  | H | -3.23763700 | 0.43214100  | 4.32385100  |
| H  | 3.68744700  | 0.08469000  | -0.15403700 | H | -5.67050500 | 0.09578100  | 4.69419600  |
| C  | 4.20385500  | -1.93319700 | 0.43497200  | H | -5.70059700 | -1.19852900 | 3.49861900  |
| H  | 4.04530000  | -2.59216100 | 1.29756900  | C | -2.92155900 | -1.81483900 | -0.67721900 |
| H  | 3.71047200  | -2.39845100 | -0.42376600 | C | -4.15315800 | -1.69481900 | -1.60087900 |
| C  | 5.68517700  | -1.77579000 | 0.16955000  | C | -1.80697600 | -2.64265500 | -1.35624100 |
| C  | 6.62422200  | -1.87284400 | 1.21030500  | H | -3.23099700 | -2.36982900 | 0.21818300  |
| C  | 6.15285100  | -1.47261100 | -1.12127500 | C | -4.66794300 | -3.08832200 | -2.00311000 |
| C  | 7.99034400  | -1.67616600 | 0.97132500  | H | -3.88383000 | -1.14524400 | -2.51030800 |
| H  | 6.28224800  | -2.10649100 | 2.21715200  | H | -4.95506800 | -1.12933500 | -1.11791400 |
| C  | 7.51655600  | -1.27450000 | -1.36719500 | C | -2.32635400 | -4.02841800 | -1.77202300 |
| H  | 5.44018600  | -1.39248700 | -1.94036000 | H | -1.44124800 | -2.11112500 | -2.24404300 |
|    |             |             |             | H | -0.94850200 | -2.74140300 | -0.68314300 |

|                                                          |             |             |             |   |             |             |             |
|----------------------------------------------------------|-------------|-------------|-------------|---|-------------|-------------|-------------|
| C                                                        | -3.56597100 | -3.92261000 | -2.67306600 | H | -3.92536900 | -0.60859200 | 0.20675400  |
| H                                                        | -5.52808100 | -2.98104600 | -2.67502600 | H | -3.80250000 | -0.94016500 | -1.51673900 |
| H                                                        | -5.02835300 | -3.61196200 | -1.10677600 | C | -2.09557700 | -2.67983800 | 0.04332600  |
| H                                                        | -1.52958400 | -4.58328600 | -2.28191500 | H | -4.11450400 | -3.12903900 | 0.61080500  |
| H                                                        | -2.58293000 | -4.60009500 | -0.86902400 | H | -3.78057100 | -3.38491000 | -1.09381100 |
| H                                                        | -3.94379900 | -4.92223800 | -2.91960000 | H | -1.75927100 | -3.71128400 | 0.20422300  |
| H                                                        | -3.28240100 | -3.44720400 | -3.62264700 | O | -1.81674600 | -1.91279800 | 1.24087400  |
| C                                                        | -2.66550800 | 1.13577300  | -1.21175800 | C | -3.43596900 | 5.07618000  | 1.47096300  |
| C                                                        | -2.42084600 | 2.54014700  | -0.62074000 | C | -3.06860900 | 3.72414000  | 1.44742200  |
| C                                                        | -1.83263100 | 0.94113400  | -2.49852800 | C | -2.12993100 | 3.23142500  | 0.51863000  |
| H                                                        | -3.72877400 | 1.04496600  | -1.46649000 | C | -1.57336100 | 4.15302900  | -0.39040900 |
| C                                                        | -2.71010000 | 3.64084700  | -1.65458900 | C | -1.93003900 | 5.50670000  | -0.37748500 |
| H                                                        | -1.37496900 | 2.61573800  | -0.30114700 | C | -2.86554000 | 5.97316800  | 0.55711600  |
| H                                                        | -3.03970400 | 2.70045500  | 0.26839400  | H | -4.16292900 | 5.43281400  | 2.19814000  |
| C                                                        | -2.11357400 | 2.04874500  | -3.52642600 | H | -3.51478100 | 3.03571000  | 2.16200500  |
| H                                                        | -0.76679800 | 0.94484800  | -2.23673700 | H | -0.84866100 | 3.79110700  | -1.11489700 |
| H                                                        | -2.03424700 | -0.03545000 | -2.94801800 | H | -1.48312700 | 6.19740400  | -1.09006400 |
| C                                                        | -1.87935000 | 3.44412900  | -2.93072600 | H | -3.14705700 | 7.02395600  | 0.57313200  |
| H                                                        | -2.50281100 | 4.62177600  | -1.21041700 | B | -1.67416100 | 1.70704600  | 0.48909000  |
| H                                                        | -3.77883100 | 3.62662800  | -1.90976000 | O | -2.24257900 | 0.89985600  | 1.48535100  |
| H                                                        | -1.48071600 | 1.89709900  | -4.40895500 | H | -1.96647200 | -0.03242600 | 1.36756300  |
| H                                                        | -3.15581600 | 1.96854800  | -3.86536200 | O | -0.79532400 | 1.28437200  | -0.42353000 |
| H                                                        | -2.12365400 | 4.21849300  | -3.66772000 | H | -2.25246200 | -2.34549700 | 1.99427600  |
| H                                                        | -0.81361800 | 3.56050800  | -2.68868700 | C | 0.89241100  | -3.38037000 | -0.38767100 |
|                                                          |             |             |             | C | 1.61519800  | -4.34324600 | -1.12196000 |
|                                                          |             |             |             | C | 0.82907200  | -3.54427900 | 1.01014500  |
| <b>dist-5'</b>                                           |             |             |             | C | 2.26484300  | -5.40854900 | -0.49200200 |
| Sum of electronic and thermal Free Energies=-3696.938226 |             |             |             | H | 1.68450700  | -4.24369000 | -2.20344700 |
| Ni                                                       | 0.13412200  | -0.39353700 | -0.58810500 | C | 1.47379800  | -4.60854400 | 1.64541800  |
| C                                                        | -1.26539100 | -2.06002900 | -1.08275200 | H | 0.27650500  | -2.81976200 | 1.59492600  |
| H                                                        | -1.67810800 | -2.35670800 | -2.05194700 | C | 2.20200400  | -5.54613800 | 0.90069800  |
| C                                                        | 0.26401500  | -2.23410600 | -1.10737000 | H | 2.82309800  | -6.12769300 | -1.08731700 |
| H                                                        | 0.59107500  | -2.24430600 | -2.15399700 | H | 1.41549600  | -4.70136100 | 2.72789800  |
| C                                                        | -7.92005100 | -1.30524900 | 0.38115800  | H | 2.71076300  | -6.36938400 | 1.39654000  |
| C                                                        | -6.52601200 | -1.20182300 | 0.46016600  | H | -1.53869400 | -0.96105700 | -1.07876500 |
| C                                                        | -5.72183000 | -1.38695500 | -0.67715600 | P | 2.10144000  | 0.47397600  | -0.18609700 |
| C                                                        | -6.35066000 | -1.68018900 | -1.89873600 | C | 2.06076800  | 2.16418000  | -0.96801500 |
| C                                                        | -7.74449600 | -1.78483200 | -1.98440000 | C | 3.73904900  | -0.24511000 | -0.78022500 |
| C                                                        | -8.53534100 | -1.59809400 | -0.84313900 | C | 2.29025000  | 0.75663700  | 1.64981800  |
| H                                                        | -8.52545500 | -1.15343300 | 1.27185200  | C | 3.27762800  | 3.06239600  | -0.67850300 |
| H                                                        | -6.05575600 | -0.97035600 | 1.41428200  | C | 1.79457000  | 2.05399700  | -2.48464200 |
| H                                                        | -5.74383300 | -1.82389100 | -2.79109200 | H | 1.16674000  | 2.61190300  | -0.52450800 |
| H                                                        | -8.21275600 | -2.00798000 | -2.94034000 | C | 4.94706700  | 0.01808500  | 0.14688700  |
| H                                                        | -9.61796100 | -1.67568300 | -0.90778200 | C | 3.65128400  | -1.73735800 | -1.13495100 |
| C                                                        | -4.21353700 | -1.31807900 | -0.57437700 | H | 3.92124200  | 0.29848900  | -1.71661500 |
| C                                                        | -3.60038300 | -2.69803900 | -0.25779000 | C | 1.28593900  | 1.78087400  | 2.21289600  |

|                                                          |             |             |             |   |             |             |             |
|----------------------------------------------------------|-------------|-------------|-------------|---|-------------|-------------|-------------|
| C                                                        | 2.13872400  | -0.58492000 | 2.39430600  | C | 0.22897200  | -2.69379200 | 0.13514300  |
| H                                                        | 3.30050100  | 1.14552100  | 1.81839600  | H | 0.44516700  | -2.55926500 | 1.19835200  |
| C                                                        | 3.08046600  | 4.45466200  | -1.30390700 | C | -1.14532200 | -2.54775200 | -0.14899700 |
| H                                                        | 4.18534000  | 2.61426800  | -1.10194900 | H | -1.78295300 | -2.48296500 | 0.72272700  |
| H                                                        | 3.44205400  | 3.15926500  | 0.40056400  | C | 6.92474800  | -2.28686500 | 1.23457600  |
| C                                                        | 1.63131100  | 3.44451700  | -3.12158800 | C | 5.75137700  | -2.35284800 | 0.47395800  |
| H                                                        | 2.62652900  | 1.53474800  | -2.97944900 | C | 4.52078000  | -1.93203600 | 1.00597000  |
| H                                                        | 0.89385200  | 1.45295800  | -2.65140500 | C | 4.49533300  | -1.44150000 | 2.32216000  |
| C                                                        | 6.25134100  | -0.48613100 | -0.49563300 | C | 5.66569800  | -1.37257400 | 3.08827900  |
| H                                                        | 4.80134200  | -0.50480800 | 1.09981200  | C | 6.88610500  | -1.79653700 | 2.54687600  |
| H                                                        | 5.04345100  | 1.08242100  | 0.37932000  | H | 7.86854100  | -2.61285400 | 0.80338900  |
| C                                                        | 4.95807600  | -2.25286400 | -1.75610100 | H | 5.79076700  | -2.73026300 | -0.54644100 |
| H                                                        | 3.42206700  | -2.31743600 | -0.23454000 | H | 3.55141000  | -1.10508600 | 2.74799100  |
| H                                                        | 2.82450300  | -1.90019600 | -1.82799300 | H | 5.62605900  | -0.98481800 | 4.10366400  |
| C                                                        | 1.48524200  | 1.96410700  | 3.72681800  | H | 7.79694900  | -1.74107800 | 3.13811200  |
| H                                                        | 0.26927400  | 1.42621400  | 2.02133900  | C | 3.24743800  | -2.03641600 | 0.19680900  |
| H                                                        | 1.38619100  | 2.74721600  | 1.70920000  | C | 2.63261400  | -3.44940500 | 0.27042800  |
| C                                                        | 2.34022700  | -0.41392800 | 3.90711200  | H | 3.44567000  | -1.78552900 | -0.84962200 |
| H                                                        | 1.12768800  | -0.96295200 | 2.20400000  | H | 2.52383400  | -1.30054400 | 0.55937900  |
| H                                                        | 2.82870600  | -1.33958600 | 2.00181900  | C | 1.29516800  | -3.60265400 | -0.47641500 |
| C                                                        | 2.83032500  | 4.35505200  | -2.81630100 | H | 3.34506600  | -4.17773400 | -0.13748200 |
| H                                                        | 3.95940800  | 5.07902200  | -1.10225500 | H | 2.47700500  | -3.72885600 | 1.31960400  |
| H                                                        | 2.22279600  | 4.94622100  | -0.82395200 | H | 0.93602900  | -4.63283400 | -0.32793400 |
| H                                                        | 1.49619400  | 3.34126100  | -4.20517800 | O | 1.45304400  | -3.37026300 | -1.88562300 |
| H                                                        | 0.71700500  | 3.91243600  | -2.73365300 | C | 3.73348700  | 3.70523700  | -3.75685100 |
| C                                                        | 6.16487500  | -1.97772400 | -0.84860300 | C | 3.23411300  | 2.44513900  | -3.40208800 |
| H                                                        | 7.08874300  | -0.30138400 | 0.18814000  | C | 2.19483000  | 2.30134900  | -2.46033300 |
| H                                                        | 6.45209000  | 0.09398700  | -1.40720300 | C | 1.67115100  | 3.47957200  | -1.89122100 |
| H                                                        | 4.86509700  | -3.32695200 | -1.95815700 | C | 2.15896600  | 4.74467300  | -2.23842000 |
| H                                                        | 5.11511500  | -1.75932800 | -2.72577900 | C | 3.19649400  | 4.86124500  | -3.17402500 |
| C                                                        | 1.36839700  | 0.62949100  | 4.47856200  | H | 4.53854500  | 3.78872200  | -4.48427200 |
| H                                                        | 0.74733000  | 2.68088200  | 4.10720300  | H | 3.65814700  | 1.55451600  | -3.86058700 |
| H                                                        | 2.47678300  | 2.40066200  | 3.91252000  | H | 0.86739000  | 3.39733700  | -1.16570400 |
| H                                                        | 2.20341200  | -1.37992500 | 4.40850500  | H | 1.73542200  | 5.63725500  | -1.78205300 |
| H                                                        | 3.37454700  | -0.09796100 | 4.10250500  | H | 3.58157000  | 5.84157100  | -3.44648300 |
| H                                                        | 2.66617200  | 5.35280500  | -3.24111600 | B | 1.63109100  | 0.87507200  | -2.03354300 |
| H                                                        | 3.72785500  | 3.94687500  | -3.30245600 | O | 2.16251300  | -0.20533600 | -2.75317500 |
| H                                                        | 7.09170200  | -2.30954400 | -1.33211100 | H | 1.78760600  | -1.03692200 | -2.40403300 |
| H                                                        | 6.06196600  | -2.56152800 | 0.07700800  | O | 0.72380400  | 0.78615300  | -1.05234600 |
| H                                                        | 1.55270100  | 0.77740400  | 5.54956000  | H | 2.11196600  | -4.00226700 | -2.21986300 |
| H                                                        | 0.34050500  | 0.25254800  | 4.38125100  | C | -1.89857500 | -2.86664600 | -1.38195600 |
|                                                          |             |             |             | C | -3.23105500 | -3.30821700 | -1.23810000 |
|                                                          |             |             |             | C | -1.40412100 | -2.66795400 | -2.68726500 |
| <b>dist-TS3'</b>                                         |             |             |             | C | -4.03629600 | -3.55839500 | -2.35097700 |
| Sum of electronic and thermal Free Energies=-3696.907038 |             |             |             | H | -3.64249300 | -3.44293200 | -0.23999000 |
| Ni                                                       | -0.14822200 | -0.74658300 | -0.34598400 | C | -2.21392600 | -2.90520800 | -3.80098600 |

|   |             |             |             |                                                          |             |             |             |
|---|-------------|-------------|-------------|----------------------------------------------------------|-------------|-------------|-------------|
| H | -0.39178000 | -2.31172100 | -2.82364200 | H                                                        | -2.12720300 | -1.21752500 | 4.99109400  |
| C | -3.53130400 | -3.35416700 | -3.64199600 | C                                                        | -4.29653800 | 1.43480200  | -2.77390500 |
| H | -5.05947900 | -3.89899000 | -2.21197600 | H                                                        | -2.98081200 | 3.12648100  | -3.15072200 |
| H | -1.81628200 | -2.73231400 | -4.79831400 | H                                                        | -4.05026600 | 3.33088200  | -1.76507000 |
| H | -4.15881900 | -3.53447800 | -4.51131800 | H                                                        | -5.44587800 | -0.21130200 | -1.93326500 |
| H | 0.82228500  | -1.47659200 | -1.09935300 | H                                                        | -5.55845600 | 1.29367500  | -1.01853300 |
| P | -1.50640400 | 0.66367700  | 0.92485500  | H                                                        | 1.91476000  | 4.83727800  | 3.01054300  |
| C | -0.41438600 | 2.11109300  | 1.34263100  | H                                                        | 0.93435100  | 3.73743300  | 3.97820800  |
| C | -2.28992000 | 0.24183900  | 2.58993500  | H                                                        | -4.51003900 | -0.98917900 | 5.64875800  |
| C | -2.87011000 | 1.34186500  | -0.15410400 | H                                                        | -5.02069100 | -1.21862800 | 3.97712700  |
| C | -1.07551000 | 3.30490500  | 2.05256100  | H                                                        | -5.10736400 | 1.80498800  | -3.41317600 |
| C | 0.84741800  | 1.63922700  | 2.09612900  | H                                                        | -3.68941600 | 0.75599300  | -3.38950300 |
| H | -0.07180300 | 2.42930900  | 0.35630400  |                                                          |             |             |             |
| C | -3.61657800 | 0.97049000  | 2.89787100  |                                                          |             |             |             |
| C | -2.43557400 | -1.26950300 | 2.85259000  | <b>dist-6'</b>                                           |             |             |             |
| H | -1.54337900 | 0.61016800  | 3.30621600  | Sum of electronic and thermal Free Energies=-3696.908107 |             |             |             |
| C | -2.29940700 | 2.12752600  | -1.35389500 | Ni                                                       | -0.94116700 | 0.11922800  | -0.95016200 |
| C | -3.74099800 | 0.17111100  | -0.65557800 | C                                                        | -1.20074400 | -1.84476600 | -1.38196800 |
| H | -3.49242700 | 2.02195100  | 0.43905600  | H                                                        | -0.62628900 | -2.28442400 | -0.57123400 |
| C | -0.07070900 | 4.46143900  | 2.20677000  | C                                                        | -2.44490300 | -1.35836700 | -0.97118100 |
| H | -1.42467000 | 3.00550300  | 3.04912900  | H                                                        | -2.65899900 | -1.48168400 | 0.08679900  |
| H | -1.95484800 | 3.64928900  | 1.49567800  | C                                                        | 4.95310600  | -4.16725400 | -1.09064700 |
| C | 1.84564000  | 2.79765700  | 2.25668700  | C                                                        | 4.00127300  | -3.48055200 | -1.85751600 |
| H | 0.57870000  | 1.25619300  | 3.09070300  | C                                                        | 2.77855100  | -3.08095800 | -1.29824700 |
| H | 1.31476900  | 0.81748000  | 1.54343800  | C                                                        | 2.53074600  | -3.38577300 | 0.05249200  |
| C | -4.07939200 | 0.69321900  | 4.33890900  | C                                                        | 3.47557500  | -4.06795700 | 0.82349700  |
| H | -4.39464800 | 0.62811700  | 2.20477200  | C                                                        | 4.69418700  | -4.46294800 | 0.25288600  |
| H | -3.51398000 | 2.04886600  | 2.74867800  | H                                                        | 5.89641300  | -4.46660300 | -1.54159300 |
| C | -2.90668400 | -1.54724000 | 4.29002900  | H                                                        | 4.21413700  | -3.24914900 | -2.89945200 |
| H | -3.16395800 | -1.69726300 | 2.15111100  | H                                                        | 1.59119300  | -3.07673300 | 0.50673800  |
| H | -1.47823800 | -1.77284600 | 2.67961500  | H                                                        | 3.26598200  | -4.28592700 | 1.86824700  |
| C | -3.42042500 | 2.60130600  | -2.29379600 | H                                                        | 5.43325400  | -4.99131900 | 0.85022700  |
| H | -1.59300100 | 1.48983300  | -1.89826000 | C                                                        | 1.73544700  | -2.34313300 | -2.10713200 |
| H | -1.72814100 | 2.99458100  | -1.00662000 | C                                                        | 0.53790500  | -3.22978000 | -2.52217000 |
| C | -4.86693600 | 0.65177100  | -1.58236900 | H                                                        | 2.18628800  | -1.89697300 | -2.99719400 |
| H | -3.10085900 | -0.52361700 | -1.20911900 | H                                                        | 1.36248100  | -1.50390700 | -1.51205300 |
| H | -4.16035300 | -0.39605100 | 0.18353500  | C                                                        | -0.74679200 | -2.41330400 | -2.72921000 |
| C | 1.19855000  | 4.00894700  | 2.94609500  | H                                                        | 0.77774000  | -3.77853100 | -3.44075600 |
| H | -0.54351300 | 5.29701400  | 2.73754600  | H                                                        | 0.33971400  | -3.98830600 | -1.75649400 |
| H | 0.20337500  | 4.83335700  | 1.20946700  | H                                                        | -1.54635500 | -3.07899000 | -3.08692100 |
| H | 2.72216800  | 2.45921600  | 2.82307900  | O                                                        | -0.53663300 | -1.38464600 | -3.72237000 |
| H | 2.20471600  | 3.09337600  | 1.26151200  | C                                                        | 4.17634000  | 4.13748500  | -2.53951700 |
| C | -4.21673600 | -0.81225700 | 4.60695500  | C                                                        | 3.24427200  | 3.10976400  | -2.73480900 |
| H | -5.03311400 | 1.20301200  | 4.52183500  | C                                                        | 2.08601200  | 3.00652600  | -1.93971500 |
| H | -3.35031800 | 1.12323300  | 5.03983000  | C                                                        | 1.89040400  | 3.98506200  | -0.94433300 |
| H | -3.02743100 | -2.62747900 | 4.43597100  | C                                                        | 2.81135200  | 5.01901100  | -0.74228200 |

|   |             |             |             |   |             |             |            |
|---|-------------|-------------|-------------|---|-------------|-------------|------------|
| C | 3.96238800  | 5.09577000  | -1.53939400 | H | -2.24875200 | -2.14392400 | 2.24446900 |
| H | 5.06822700  | 4.19200500  | -3.16064200 | H | -0.87629300 | -2.68902400 | 1.28519700 |
| H | 3.42114800  | 2.36635600  | -3.50917400 | C | -2.51482200 | 3.92462600  | 1.91856000 |
| H | 1.00381200  | 3.92225400  | -0.31805400 | H | -1.49585400 | 2.83738200  | 0.33425500 |
| H | 2.63914500  | 5.76045300  | 0.03546400  | H | -0.45514700 | 3.31801600  | 1.66269900 |
| H | 4.68509200  | 5.89367600  | -1.38253000 | C | -4.14603300 | 2.02578100  | 2.29032200 |
| B | 1.05966400  | 1.80419500  | -2.09349700 | H | -3.20743200 | 0.90257000  | 0.70660200 |
| O | 1.26667600  | 0.96032100  | -3.18705200 | H | -3.24790100 | 0.05116100  | 2.24786400 |
| H | 0.60966000  | 0.23483900  | -3.19990000 | C | 4.11775400  | 1.37141100  | 2.27046800 |
| O | 0.10225100  | 1.65355400  | -1.16414800 | H | 3.34210000  | 2.55854900  | 3.92218100 |
| H | -0.26986000 | -1.82878400 | -4.54607000 | H | 2.91723300  | 3.17149100  | 2.32315900 |
| C | -3.63932600 | -0.99888800 | -1.75758600 | H | 4.44060700  | 0.21624400  | 0.45344000 |
| C | -4.84767700 | -0.80264200 | -1.05634600 | H | 3.60783000  | 1.75044700  | 0.20160400 |
| C | -3.65014400 | -0.85129300 | -3.16128600 | C | -1.30517500 | -3.12599400 | 4.70916500 |
| C | -6.02943600 | -0.47894300 | -1.72782700 | H | -0.86813100 | -1.54438000 | 6.13745300 |
| H | -4.86030900 | -0.90777100 | 0.02617600  | H | 0.51989300  | -2.06183500 | 5.18233800 |
| C | -4.83354500 | -0.53460900 | -3.83123400 | H | -1.52371200 | -4.40047600 | 2.95825000 |
| H | -2.72812100 | -0.96000400 | -3.72084800 | H | 0.11701500  | -3.81728400 | 3.23144200 |
| C | -6.02825300 | -0.34562600 | -3.12169000 | C | -3.94002000 | 3.41223300  | 1.66310500 |
| H | -6.94785800 | -0.33108000 | -1.16515200 | H | -2.36494500 | 4.89392300  | 1.42727100 |
| H | -4.82396900 | -0.42506400 | -4.91314900 | H | -2.37985700 | 4.09224000  | 2.99660300 |
| H | -6.94462000 | -0.09240400 | -3.64900200 | H | -5.14737100 | 1.64379800  | 2.05634300 |
| H | -1.26366500 | 0.32816400  | -2.32799400 | H | -4.08225800 | 2.10480100  | 3.38458700 |
| P | -0.43072800 | 0.27583000  | 1.42057900  | H | 5.06485800  | 1.92101500  | 2.20473600 |
| C | 1.24891700  | 1.06628300  | 1.57476300  | H | 4.30076300  | 0.49991000  | 2.91549900 |
| C | -0.39409800 | -1.10562200 | 2.70723900  | H | -1.08188500 | -3.94733400 | 5.40070300 |
| C | -1.65197600 | 1.53962200  | 2.06451300  | H | -2.38752200 | -2.94479900 | 4.77015700 |
| C | 1.68337100  | 1.51956600  | 2.97960000  | H | -4.67699700 | 4.12296500  | 2.05643100 |
| C | 2.32502100  | 0.17374800  | 0.92430600  | H | -4.11024000 | 3.34388800  | 0.57935200 |
| H | 1.15441700  | 1.94697900  | 0.93477800  |   |             |             |            |
| C | -0.80074200 | -0.70039000 | 4.14139400  |   |             |             |            |
| C | -1.17482800 | -2.36817200 | 2.28622300  |   |             |             |            |
| H | 0.66836800  | -1.38505800 | 2.73230800  |   |             |             |            |
| C | -1.45083800 | 2.92958300  | 1.42497800  |   |             |             |            |
| C | -3.08544600 | 1.03412500  | 1.78985800  |   |             |             |            |
| H | -1.51741600 | 1.64284200  | 3.14730600  |   |             |             |            |
| C | 3.03558900  | 2.25266900  | 2.91412300  |   |             |             |            |
| H | 1.78835300  | 0.64858300  | 3.63919300  |   |             |             |            |
| H | 0.92614500  | 2.17241500  | 3.42924400  |   |             |             |            |
| C | 3.68505000  | 0.88932400  | 0.87754900  |   |             |             |            |
| H | 2.43365800  | -0.76566200 | 1.48234900  |   |             |             |            |
| H | 2.01287300  | -0.09107200 | -0.08938200 |   |             |             |            |
| C | -0.55786600 | -1.85297400 | 5.13171800  |   |             |             |            |
| H | -1.86658700 | -0.43963100 | 4.15768800  |   |             |             |            |
| H | -0.25459700 | 0.18703900  | 4.47119400  |   |             |             |            |
| C | -0.94202100 | -3.52539500 | 3.27218800  |   |             |             |            |
